# Supplementary material for: Vitamin B12 alleviates spliceosomopathy via phospholipid remodeling
Source: Research Square preprint supplement (doi:10.21203/rs.3.rs-8077579/v1), 2025-11-17
Supplement: Supplementary file 1 [file 56a91a92de5d9951f6ab51c5.docx]

Figure S1


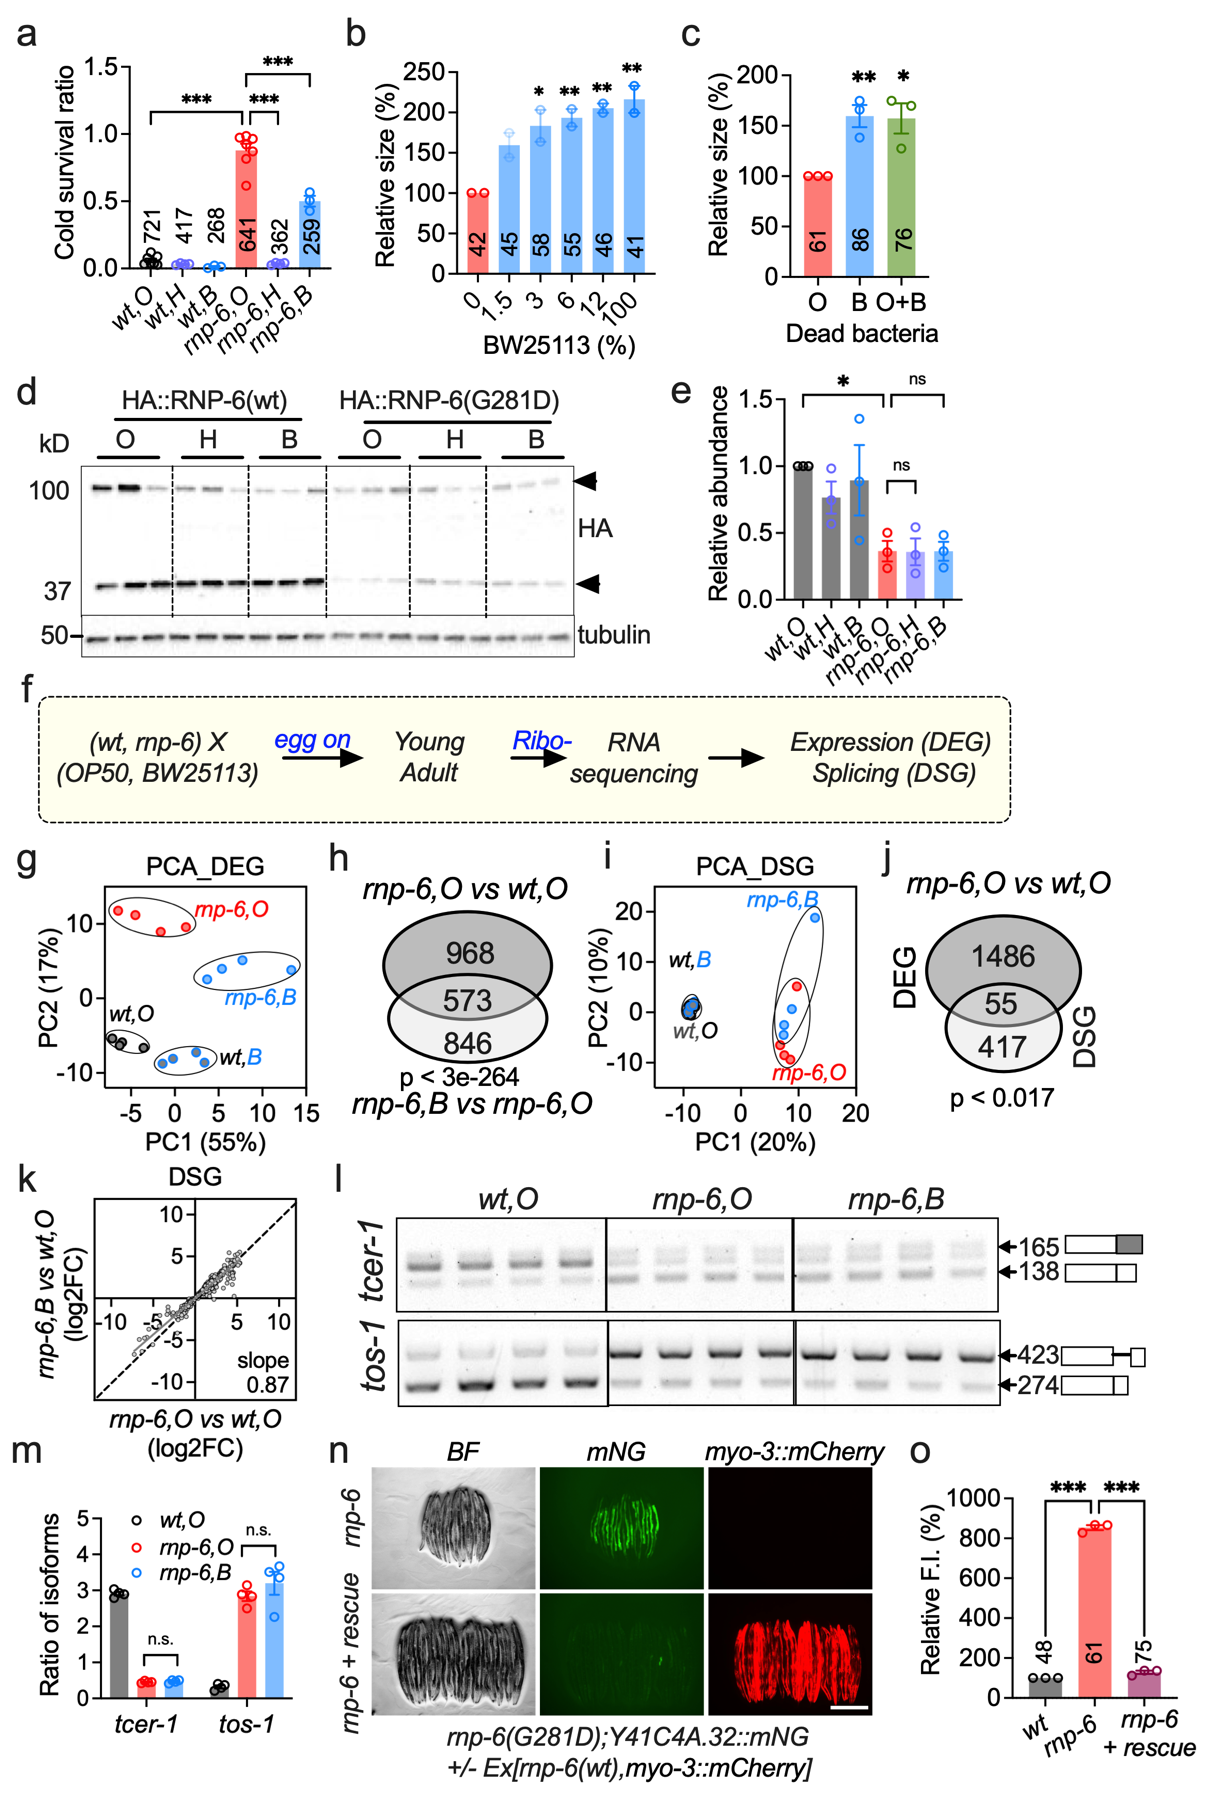


**Figure S1. A bacterial *E. coli* K12 diet mitigates developmental defects in an *rnp-6*/VRJS *C. elegans* model.** **a**, Assessment of cold tolerance in worms fed *E. coli* K12 strains; bars represent the ratio of alive to dead worms per genotype and diet after cold shock (*n* = 3–7). **b**, Evaluation of BW25113 dilution effects on worm body size (*n* = 2). **c**, Body size of *rnp-6* mutant worms fed UV-killed BW25113 and OP50-BW25113 (ratio 1:1) mixture (*n* = 3). **d–e**, Total RNP-6 protein abundance in response to K12 diets. The total amounts of two predominant RNP-6 isoforms (as denoted by arrowheads) were quantified (*n* = 3). **f**, Overview of RNA sequencing experimental design. Ribo-, ribosomal RNA depletion. **g**, Principal component analysis of differentially expressed genes (DEG), four biological replicates were analyzed for each condition. **h**, Venn diagram of DEGs changed by *rnp-6* mutation on OP50 and BW25113. **i**, Principal component analysis of differentially spliced genes (DSG). **j**, Overlap between DEGs and DSGs, shown by Venn diagram. **k**, Effect of BW25113 *E. coli* on alternative splicing; shown are 638 events significantly altered by *rnp-6(G281D)* on OP50. l**–m**, RT-PCR splicing analyses of *tos-1* and *tcer-1* (*n* = 4). **n–o**, Effect of *rnp-6(wt)* overexpression on Y41C4A.32::mNG reporter expression. *myo-3::mCherry* co-injection marker indicates transgenic animals (*n* = 3, scale bar: 500 μm). Data are presented as mean ± s.e.m. unless otherwise indicated; “*n*” denotes experimental replicates, with animal counts summarized in each respective bar. Statistical significance was determined using one-way ANOVA with Dunnett’s multiple comparisons (**a**, **b**, **c**, **e**, **m**, **o**). All the source data for figures are provided in supplementary tables.

Figure S2


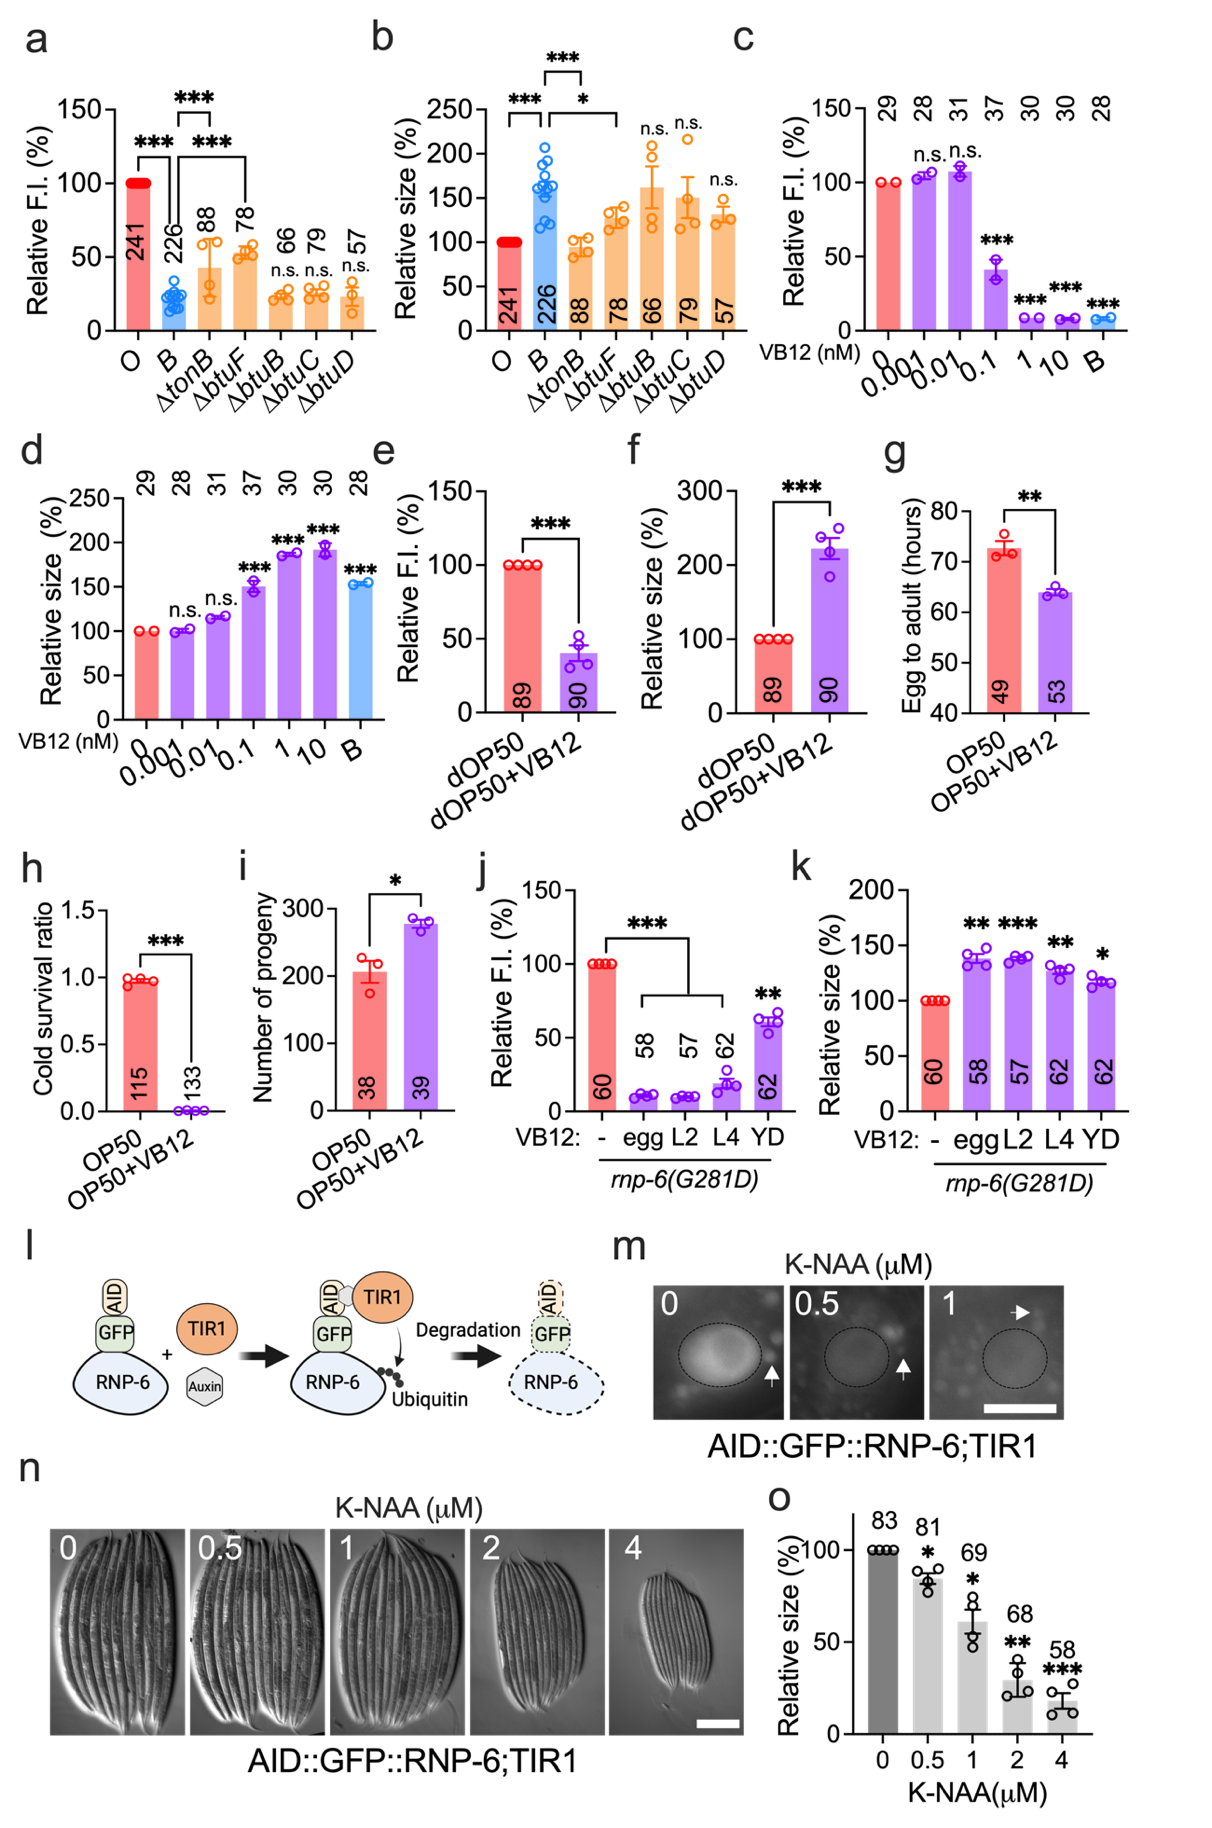


**Figure S2. A complementary two-way genetic screen identifies vitamin B12 as an alleviator of *rnp-6(G281D)* mutant defects.** **a–b**, Effects of alternative vitamin B12 transporters on Y41C4A.32 reporter expression (**a**) and body size (**b**) in *rnp-6(G281D)* mutants (*n* = 4–12). **c–d**, Dose-response effects of vitamin VB12 supplementation on *rnp-6(G281D)* phenotypes (*n* = 2). **e–f**, Impact of VB12 supplementation in *rnp-6(G281D)* mutants fed UV-killed OP50 (*n* = 4). **g–i**, Effects of VB12 supplementation on developmental rate (**g**, *n* = 3), cold tolerance (**h**, *n* = 4), and brood size (**i**, *n* = 3). **j–k**, Effects of VB12 supplementation administered from distinct developmental stages on Y41C4A.32 reporter expression (**j**) and body size (**k**) in *rnp-6(G281D)* mutants (*n* = 4). Worms were imaged on day 2 of adulthood. **l**, Schematic illustrating the RNP-6 inducible degradation system. The image was made in BioRender. **m**, Effects of K-NAA supplementation on GFP::RNP-6 fluorescence intensity on OP50 (scale bar: 10 μm). The nuclei of the intestine are indicated with circles. The arrows indicate gut autofluorescent granules. **n–o**, Impact of various K-NAA concentrations on worm body size on OP50 (*n* = 4, scale bar: 200 μm). The final concentration of VB12 is 1 nM unless otherwise noted. Statistical significance was determined using one-way ANOVA with Dunnett’s multiple comparisons. Significance is represented as *P < 0.05, **P < 0.01, ***P < 0.001, n.s.: not significant.

Figure S3


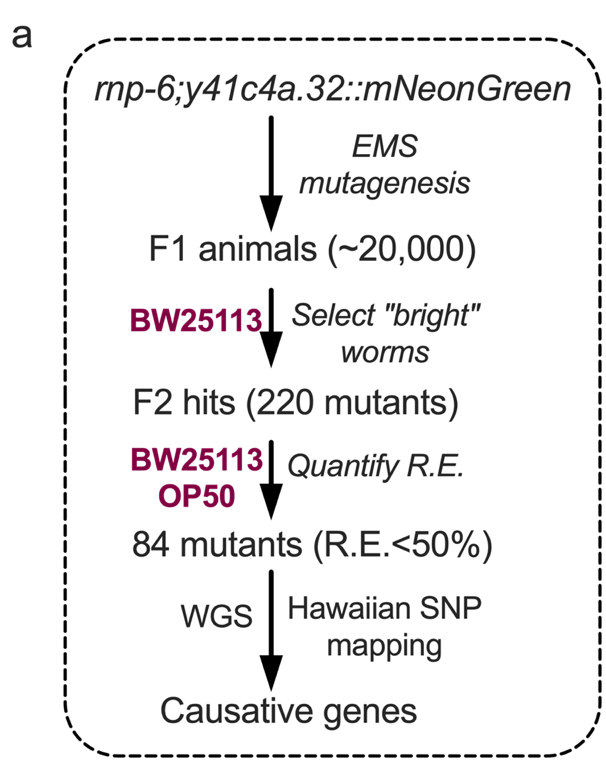


**Figure S3. Vitamin B12 alleviates *rnp-6(G281D)* mutant defects via methionine metabolism pathways. a**, Schematic of EMS mutagenesis screen for host factors. R.E. (rescue efficacy) = (Fluorescent intensity on OP50 - Fluorescent intensity on BW25113)/ Fluorescent intensity on OP50.

Figure S4


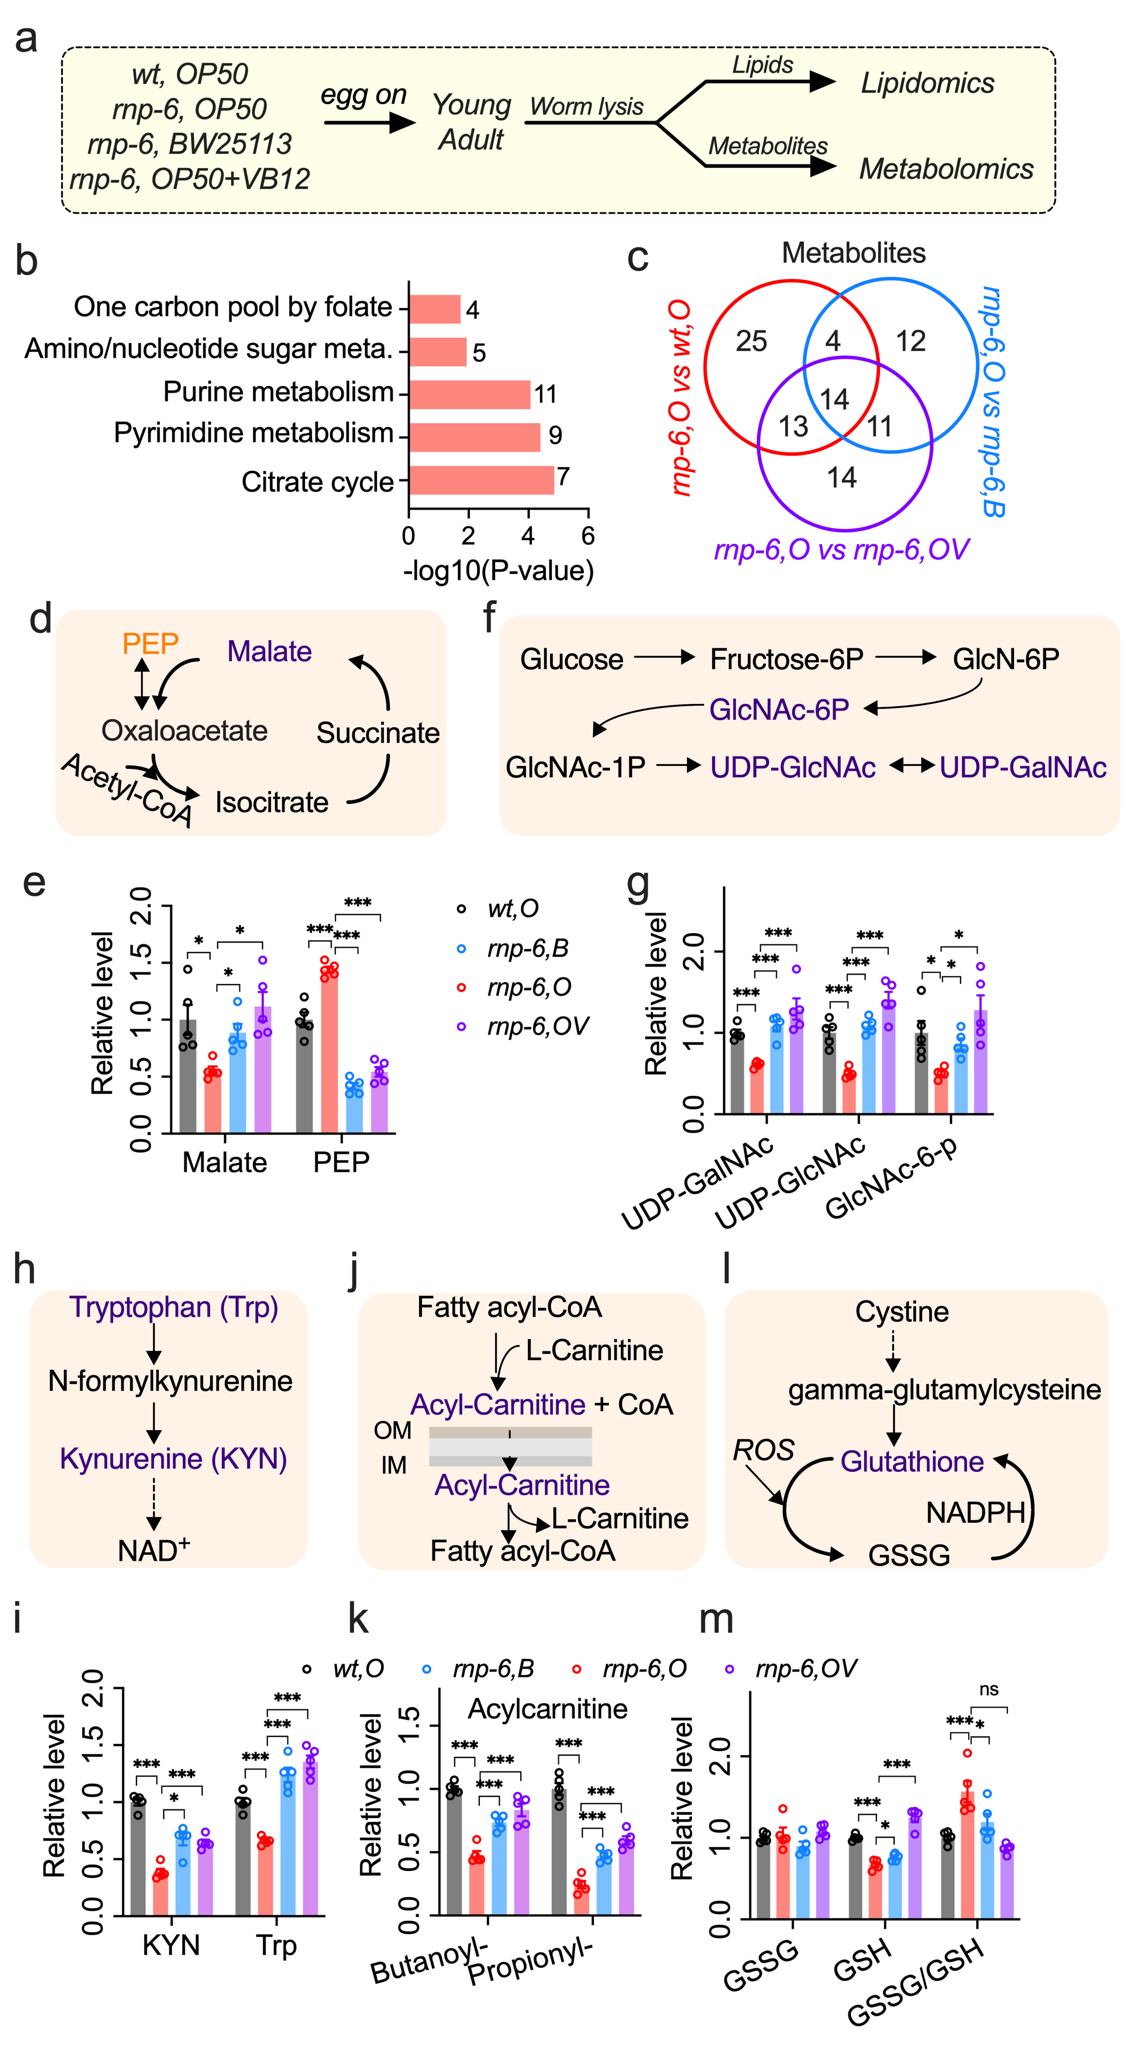


**Figure S4. Vitamin B12 restores methylation potential and phosphatidylcholine metabolism in *rnp-6* mutants.** **a**, Workflow for metabolomic and lipidomic analyses. Five replicates per condition. **b**, MetaboAnalyst-based pathway analysis of metabolites significantly altered in *rnp-6(G281D)* mutants. **c**, Venn diagram of significantly altered metabolites. Simplified schematics and abundance changes are shown for the following pathways: **d–e**, tricarboxylic acid (TCA) cycle; **f–g**, amino sugar and nucleotide sugar metabolism; **h–i**, kynurenine pathway; **j–k**, mitochondrial fatty acid metabolism; **l–m**, glutathione metabolism. Statistical significance was determined using one-way ANOVA with Dunnett’s multiple comparisons. Significance is represented as *P < 0.05, **P < 0.01, ***P < 0.001, n.s.: not significant.

Figure S5


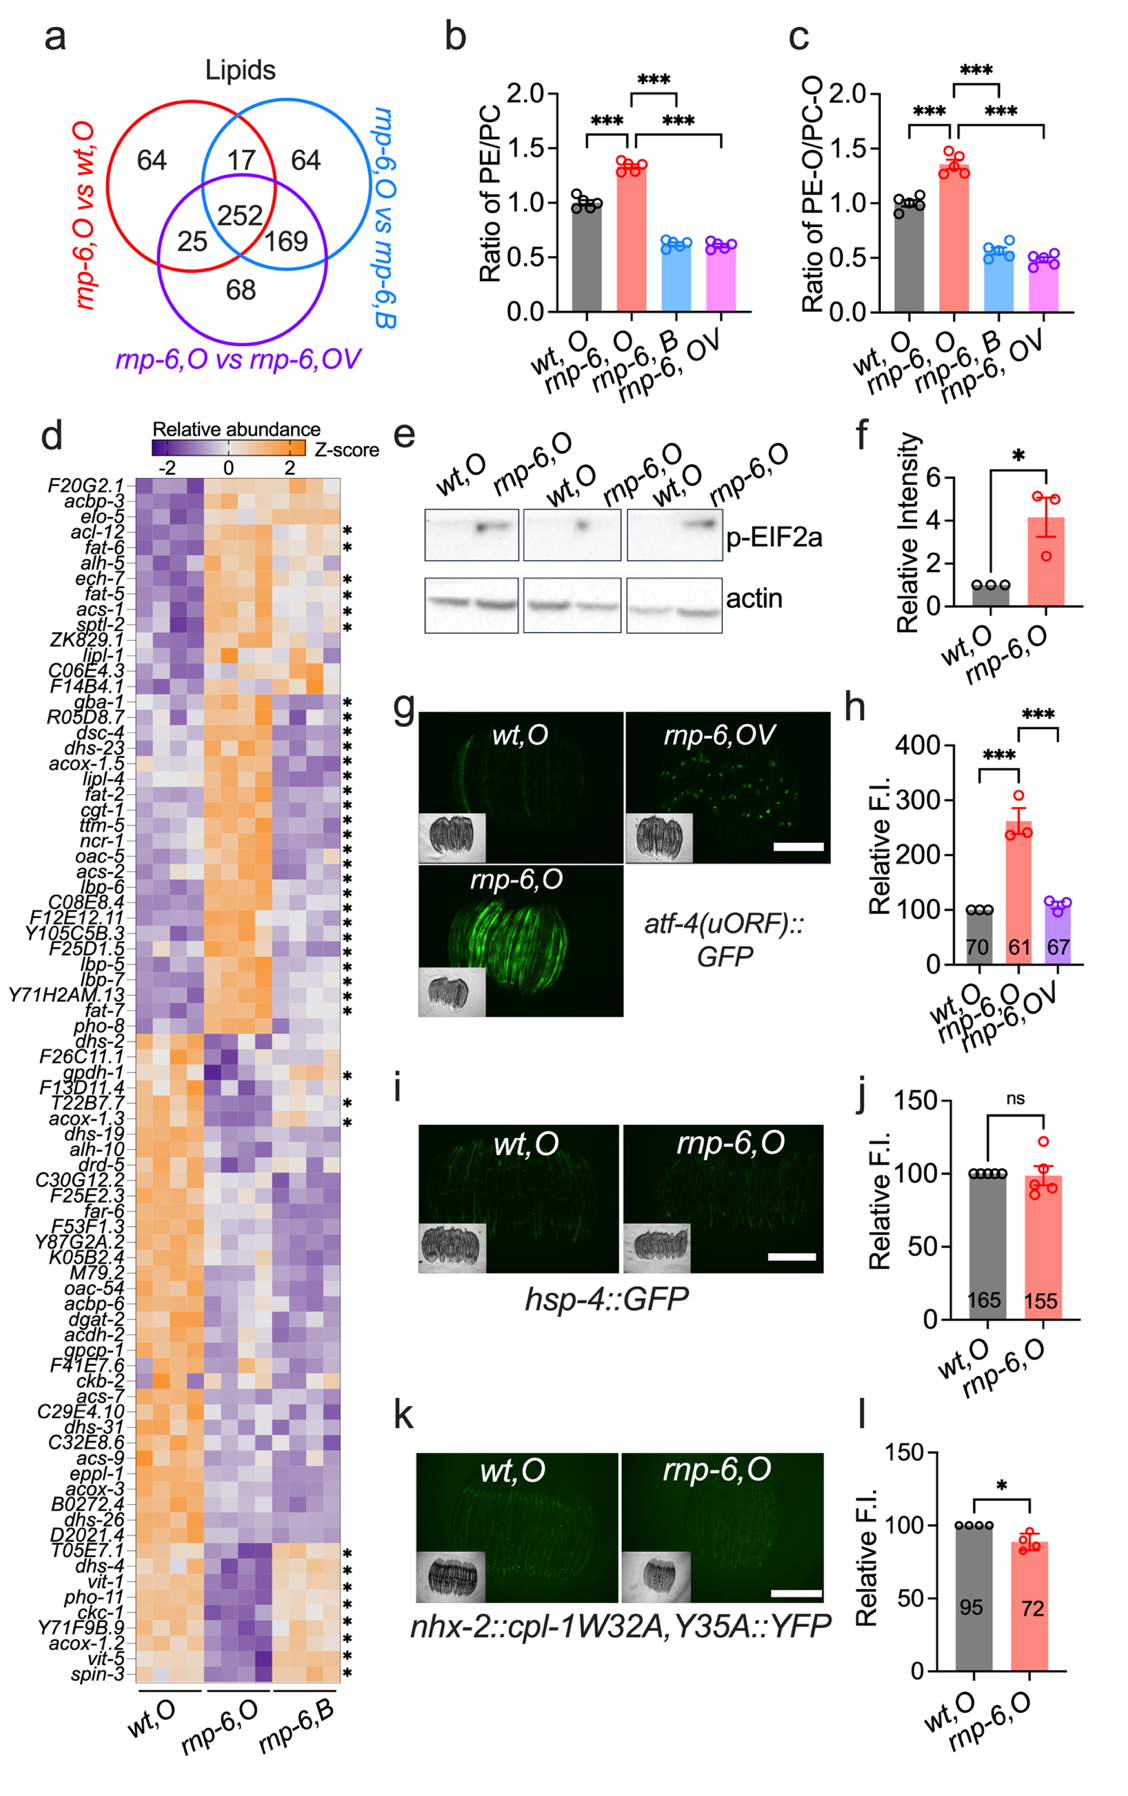


**Figure S5. Vitamin B12 restores phosphatidylcholine metabolism and the integrated stress response in *rnp-6* mutants.** **a**, Venn diagram of significantly altered lipid species. **b**, Ratio of phosphatidylethanolamine (PE) to phosphatidylcholine (PC) changes. **c**, Ratio of ether-linked PE (PE-O) to ether-linked PC (PC-O) changes. **d**, Heat map of differentially expressed genes (DEGs) associated with lipid metabolism; “*” denotes genes significantly restored by BW25113 diet. **e–f**, Western blot analysis of eIF2α phosphorylation in *rnp-6* mutants, with three biological replicates analyzed (n = 3). **g–h**, Representative images and quantification of ISR reporter strain atf-4(uORF)::GFP expression (scale bar: 500 μm). **i–j**, Representative images and quantification of unfolded protein response of the endoplasmic reticulum (UPRER) reporter strain hsp-4::GFP expression (n = 5, scale bar: 500 μm).**k–l**, Representative images and quantification of CPL-1 reporter strain cpl-1W32A,Y35A::YFP expression (*n* = 4, scale bar: 500 μm). Statistical significance was determined using unpaired t-test (**f**, **j**, **l**) and one-way ANOVA with Dunnett’s multiple comparisons (**h**). Significance is represented as *P < 0.05, **P < 0.01, ***P < 0.001, n.s.: not significant.

Figure S6

**Figure S6.** ***rnp-6* mutant defects are primarily caused by aberrant splicing of transcription factor *nhr-114*.** **a**, Gene set enrichment analysis of differentially spliced genes involved in metabolism, performed with WormCat 2.0. **b–c**, Quantification of Y41C4A.32::mNG fluorescence intensity and worm body size after *nhr-114* RNAi (n = 5) treatment. **d**, Quantification of *nhr-114* intron 4 retention in *rbm-39(S294L)* mutants from RNAseq data. n=3. **e**, Venn diagram illustrating differentially expressed genes in the *nhr-114* deletion mutant and the *rnp-6* mutant. **f**, Venn diagram illustrating genes that are differentially spliced. **g**, Wormcat gene set enrichment analysis of the overlapped genes in (e). **h**, Venn diagram of differentially expressed genes significantly rescued by either VB12 supplementation in *nhr-114* deletion mutants or BW25113 diet in *rnp-6* mutants. **i–j**, RT-PCR analysis of *nhr-114* intron 4 retention in different *nhr-114* gene editing mutants. *nhr-114(+)* results in almost complete intron retention; one biological replicate for *rnp-6; nhr-114(i4+)* was excluded from quantification due to technical failure (n = 3–4). Statistical significance was determined using unpaired t-test (**b, c**) and one-way ANOVA with Dunnett’s multiple comparisons (**d, i**). Significance is represented as *P < 0.05, **P < 0.01, ***P < 0.001, n.s.: not significant.

Figure S7

**Figure S7.** ***prp-19*****inhibition dysregulates metabolism.** **a**, Volcano plot of differentially expressed genes caused by *prp-19* RNAi. The red and green dots indicate *Y41C4A.32* and *nhr-114*, respectively. **b**, Wormcat enrichment analysis of differentially expressed genes. **c**, Heatmap of differentially expressed genes related to 1CC and phospholipid metabolism. **d**, Pie chart of differentially spliced genes caused by *prp-19* RNAi. **e**, Wormcat enrichment analysis of differentially spliced genes. **f**, Heatmap of differentially spliced genes related to 1CC and phospholipid metabolism. **g**, Representative images of Y41C4A.32::mNG upon *prp-19* RNAi treatment (scale bar: 500 μm). **h**, Quantification of Y41C4A.32::mNG fluorescent intensity upon *prp-19* RNAi treatment. **i**, Quantification of body size upon *prp-19* RNAi treatment. j**-k,** Quantification of *nhr-114* intron 4 retention and expression levels in ARD worms, analyzed by RNA-seq (n = 4). Statistical significance was determined using unpaired t-test (**j, k**) and one-way ANOVA with Dunnett’s multiple comparisons (**h, i**). Significance is represented as *P < 0.05, **P < 0.01, ***P < 0.001, n.s.: not significant.

Figure S8


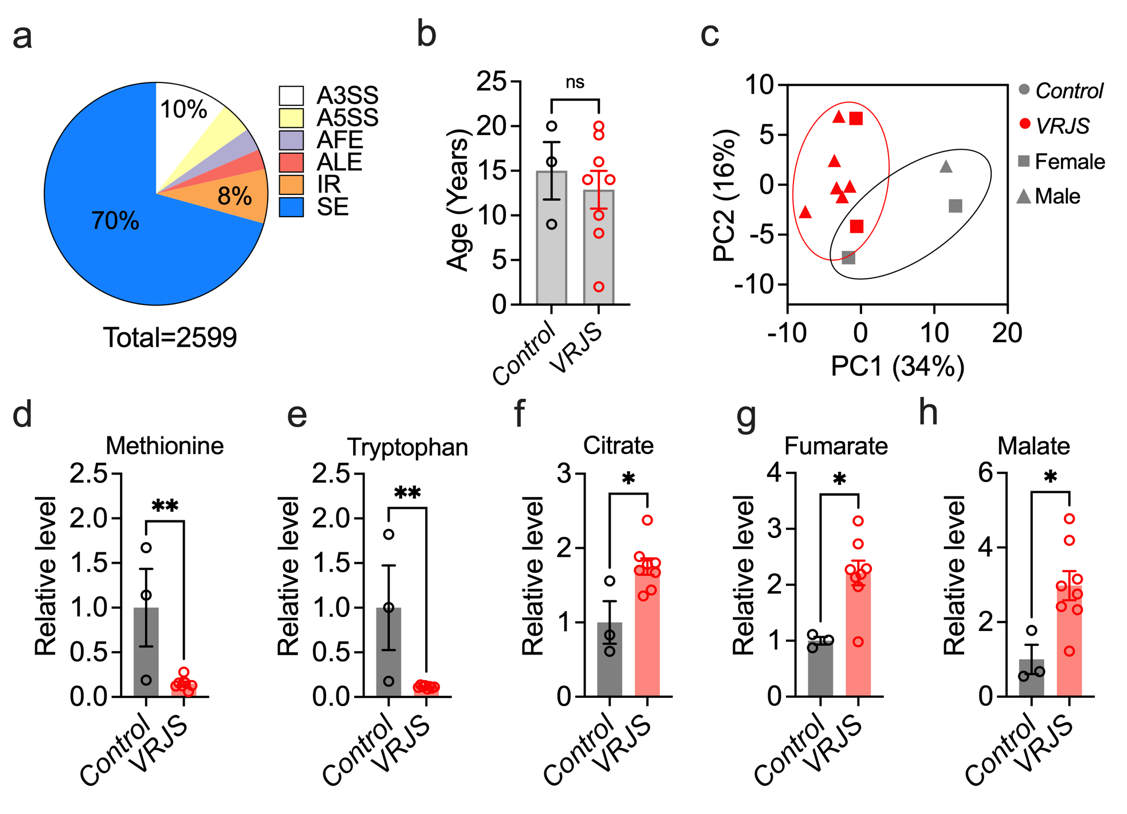


**Figure S8. PUF60 deficiency impairs 1CC and phospholipid metabolism in human cells. a,** Pie chart displaying differentially spliced events in the siPUF60-treated PC9 cell line. **b**, Age distribution of individuals for blood samples. **c**, PCA analysis of metabolomic and lipidomic data. **d-h**, The relative abundance of methionine (d), tryptophan (e), citrate (f), fumarate (g) and malate (h) in VRJS patient plasma. Statistical significance was determined using unpaired t-test Significance is represented as *P < 0.05, **P < 0.01, ***P < 0.001, n.s.: not significant.

Figure S9


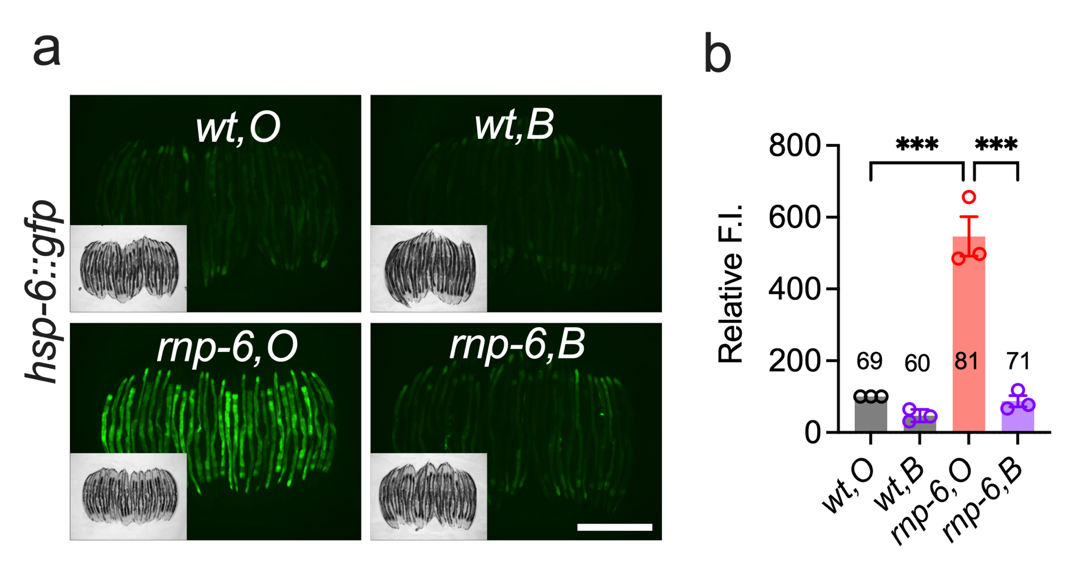


**Figure S9. *E. coli* BW25113 alleviates mitochondrial stress in *rnp-6(G281D)* mutants. a,** Representative images of *hsp-6::gfp* expression in *rnp-6* mutants. Scale bar, 500 mm. n=3. b, Quantification of *hsp-6::gfp* fluorescent intensity. One-way ANOVA with Dunnett’s multiple comparison test was used for statistical analysis. ***P < 0.001.
