# Supplementary material for: Vitamin B12 alleviates spliceosomopathy via phospholipid remodeling
Source: Research Square preprint supplement (doi:10.21203/rs.3.rs-8077579/v1), 2025-11-17
Supplement: Supplementary file 2 [file a64a3c70edbff08f7c16b22c.xlsx]

## Sheet: Information of tables
	Description
	Supplementary Table 1. Gene expression analysis of rnp-6(G281D) mutants.
	Supplementary Table 2. Gene splicing analysis of rnp-6(G281D) mutants.
	Supplementary Table 3. The list of overlapped differentially expressed genes (DEG) and differentially spliced genes (DSG).
	Supplementary Table 4. The list of DEGs (rnp-6_OP50 vswt_OP50) that are significantly rescued by BW25113 diet.
	Supplementary Table 5. The list of BW25113 mutants that partially loss the rescue effects on Y41C4A.32 expression.
	Supplementary Table 6. The metabolomic analysis of rnp-6(G281D) mutants.
	Supplementary Table 7. The lipidomic analysis of rnp-6(G281D) mutants.
	Supplementary Table 8. List of metabolism-related genes that show robust splicing changes in rnp-6(G281D) mutants.
	Supplementary Table 9. RNAi hits from targeted screen.
	Supplementary Table 10. Gene expression analysis of nhr-114 mutants with DEseq2.
	Supplementary Table 11. Gene expression analysis of prp-19 RNAi with DEseq2.
	Supplementary Table 12. Gene splicing analysis of prp-19 RNAi with SAJR.
	Supplementary Table 13. Gene splicing analysis of PUF60 siRNA-treated PC9 cells.
	Supplementary Table 14. KEGG pathway analysis of PUF60-dependent DSGs.
	Supplementary Table 15. Metabolomic analysis of VRJS plasma.
	Supplementary Table 16. Lipidomic analysis of VRJS plasma.
	Supplementary Table 17. Reagents and resources used in this study.
	Supplementary Table 18. Lifespan resultsgenerated in this study.

## Sheet: S1
Supplementary Table 1. Gene expression analysis with DEseq2. Events with BH-adjusted P value below 0.05 and log2FC>0.5 were defined as significant.
ensembl_gene_id	gene_name	rnp6_OP50.Rep_1	rnp6_OP50.Rep_2	rnp6_OP50.Rep_3	rnp6_OP50.Rep_4	wt_OP50.Rep_1	wt_OP50.Rep_2	wt_OP50.Rep_3	wt_OP50.Rep_4	baseMean	log2FoldChange	lfcSE	pvalue	padj		ensembl_gene_id	gene_name	wt_OP50.Rep_1	wt_BW.Rep_1	wt_OP50.Rep_2	wt_BW.Rep_2	wt_OP50.Rep_3	wt_BW.Rep_3	wt_OP50.Rep_4	wt_BW.Rep_4	baseMean	log2FoldChange	lfcSE	pvalue	padj		ensembl_gene_id	gene_name	rnp6_OP50.Rep_1	rnp6_BW.Rep_1	rnp6_BW.Rep_2	rnp6_OP50.Rep_2	rnp6_OP50.Rep_3	rnp6_BW.Rep_3	rnp6_OP50.Rep_4	rnp6_BW.Rep_4	baseMean	log2FoldChange	lfcSE	pvalue	padj
WBGene00018823	F54E2.1	8348.72	9199.11	9013.18	9412.18	2883.69	2831.4	3047.52	2780.49	5939.54	1.63861	0.0446214	2.66071e-296	4.83345e-292		WBGene00019779	endu-2	5001.57	1230.78	4257.37	1066.7	4645.87	1099.93	4557.82	1264.03	2890.51	-1.98229	0.0619756	8.16785e-226	1.25572e-221		WBGene00020579	T19D12.4	5208.18	1719.35	1460.11	5442.78	5334.26	1645.23	5244.75	1534.81	3448.68	-1.73639	0.050713	3.57474e-258	5.92119e-254
WBGene00020579	T19D12.4	5529.03	5765.24	5647.7	5518.56	1584.9	1732.24	1764.6	1858.07	3675.04	1.6923	0.0466697	4.68956e-289	4.25952e-285		WBGene00011668	clec-47	2546.57	997.979	2651.1	989.264	2443.68	908.788	2554.71	945.726	1754.73	-1.40665	0.0484529	1.2159e-186	9.34666e-183		WBGene00019779	endu-2	5840.66	1288.58	1239.72	5665.03	5769.57	964.594	5616.55	1074.13	3432.35	-2.32218	0.0732221	5.23498e-222	4.33561e-218
WBGene00045416	Y37H2A.14	1291.21	1775.81	1510.86	1661.69	38.6702	40.7869	43.2175	34.3999	799.581	5.31203	0.148767	2.92654e-280	1.77212e-276		WBGene00003093	lys-4	10476	4656.11	10049.5	4676.05	9357.6	4673.13	9360.93	4702.76	7244.01	-1.06585	0.0400622	3.2149e-157	1.64753e-153		WBGene00010904	ugt-62	9554.81	4067.47	3853.8	9483.53	9768.5	3735.69	9839.43	4313.88	6827.14	-1.27207	0.0454718	1.94615e-173	1.07453e-169
WBGene00000137	amx-1	3264.75	3383.04	3116.81	3101.66	1045.08	1068.26	1104.78	1056.65	2142.63	1.58806	0.0467956	1.1304e-253	5.13369e-250		WBGene00017678	asp-12	1220.51	149.782	823.78	175.52	1046.98	193.037	1142.62	240.271	624.063	-2.46196	0.13428	2.96226e-76	1.13855e-72		WBGene00003093	lys-4	11515.5	5293.48	5239.5	11037.6	11204.8	4899.34	12161.9	5424.33	8347.06	-1.13575	0.0437825	1.8966e-149	7.85383e-146
WBGene00000190	arf-1.1	1123.26	1110.92	1177.02	1572.09	55.2276	48.3064	55.4023	43.2172	648.179	4.61665	0.149985	3.01873e-209	1.09677e-205		WBGene00009493	hrg-4	307.658	798.152	220.708	790.064	251.588	937.759	252.231	807.044	545.65	1.67724	0.0992057	2.46323e-65	7.57394e-62		WBGene00017678	asp-12	2624.61	335.357	496.604	3036.38	2423.65	372.989	2583.6	343.506	1527.09	-2.77548	0.10773	1.1929e-147	3.95184e-144
WBGene00007965	C36A4.4	17514.2	17576.3	17165.9	16825.1	9871.2	9987.67	10260.7	10010.4	13651.4	0.782465	0.0261275	4.93798e-198	1.49505e-194		WBGene00003411	mrp-5	6639.42	10539.2	5924.6	10743.4	6397.81	12298.3	6234.32	10740.2	8689.65	0.808603	0.0510575	9.73745e-58	2.13862e-54		WBGene00018823	F54E2.1	7884.08	2823.87	2189.85	8706.49	8534.43	2290.23	8967.75	2678.21	5509.36	-1.76633	0.0738461	1.0346e-127	2.85619e-124
WBGene00011844	T19C9.8	715.078	769.44	694.605	745.298	25.6812	37.6348	25.4581	22.0306	379.403	4.72722	0.158651	7.60567e-196	1.97378e-192		WBGene00007605	hrg-7	7372.78	28474	6612.04	27027.9	7689.86	38149.4	6486.77	28224.7	18754.7	2.10097	0.13647	1.47657e-54	2.83759e-51		WBGene00018393	msra-1	12011.9	4694.28	4700.9	11928.6	12897	4230.46	14059.3	5053.34	8696.99	-1.44086	0.0626209	2.09452e-118	4.95624e-115
WBGene00012592	Y38E10A.14	1985.23	2097.27	2120.39	1866.61	562.151	624.782	548.986	566.605	1296.5	1.80735	0.0631348	2.13182e-181	4.84084e-178		WBGene00003096	lys-7	5983.88	3244	6381.19	3616.22	5812.43	3180.29	5712.12	2876.45	4600.82	-0.87953	0.0597692	2.67241e-50	4.56507e-47		WBGene00000219	asp-6	77929.7	45394	44634.2	75031.4	72633.4	43569.2	72568	45687	59680.9	-0.732718	0.0323622	4.02956e-114	8.34321e-111
WBGene00022644	dod-19	10082.9	11467.2	10302.2	11529.7	3956.14	4223.86	3852.87	4030.08	7430.62	1.43001	0.0500833	1.79843e-180	3.63003e-177		WBGene00021503	ctsa-2	1405.86	2480.45	1411.92	2525.75	1545.66	2843.73	1352.08	2370.73	1992.02	0.830641	0.0619073	2.47042e-42	3.79803e-39		WBGene00007331	pho-11	801.973	2865.6	3193.23	833.593	724.173	2764.18	588.48	2922.71	1836.74	1.98451	0.0889401	1.85495e-111	3.41393e-108
WBGene00020346	rbm-5	3951.2	3664.58	3940.69	3678.74	7239.61	7126.84	7101.71	7257.27	5495.08	-0.912053	0.0351316	1.27809e-149	2.32177e-146		WBGene00000373	cyp-14A5	501.58	206.204	524.467	212.563	446.433	175.826	498.688	199.621	345.673	-1.30048	0.0971687	3.88039e-42	5.42338e-39		WBGene00000783	cpr-3	1193.24	235.321	184.08	1238.01	1563.12	221.952	1639.81	238.161	814.212	-2.66898	0.119981	6.64865e-111	1.10128e-107
WBGene00002271	lec-8	5579.56	6108.37	5061.4	5422.26	1907.5	2126.01	1948.71	1996.94	3768.84	1.47022	0.0575678	4.34784e-145	7.18026e-142		WBGene00015759	C14C6.5	1551.57	778.105	1502.34	785.129	1437.85	902.324	1581.35	706.593	1155.66	-0.927207	0.0701081	3.38962e-41	4.34266e-38		WBGene00018427	F44E7.5	5911.39	2191.93	2082.75	5867.49	5545.53	1844.3	4899.89	1894.31	3779.7	-1.46599	0.0698966	6.5492e-99	9.8619e-96
WBGene00000788	cpz-1	7856.7	7479.51	8127.79	8023.22	14920	15509.6	16518.6	16084.9	11815	-0.998515	0.0392882	1.45393e-143	2.20101e-140		WBGene00010256	hrg-3	35.3321	238.118	37.6328	239.799	34.3868	474.839	23.9266	255.118	167.394	3.17252	0.246608	3.71951e-39	4.08455e-36		WBGene00002273	lec-10	7013.64	4320.85	4018.35	7247.48	6990.77	3913.04	7123.87	3929.9	5569.74	-0.806666	0.0395338	1.03182e-93	1.42426e-90
WBGene00010904	ugt-62	10124.5	10026.7	10323.2	10333.8	5502.81	5694.03	5735.4	5199.46	7867.49	0.881227	0.0354977	4.96548e-137	6.93868e-134		WBGene00013216	Y54G11A.7	678.992	1361.74	600.952	1271.04	645.484	1707.7	655.929	1308.7	1028.82	1.11684	0.0887718	1.672e-37	1.60658e-34		WBGene00009595	cbp-3	1318.99	513.692	518.204	1543.91	1587.81	555.256	1521.76	535.37	1011.87	-1.48594	0.0732682	1.2558e-92	1.60008e-89
WBGene00018427	F44E7.5	6206.26	6146.47	5806.54	5098.75	2106.66	2146.57	2013.24	2255.93	3972.55	1.44325	0.0608695	1.92487e-125	2.49766e-122		WBGene00008390	D1086.3	936.736	1667.02	918.003	1625.36	987.227	1574.35	1056.22	1534.91	1287.48	0.704821	0.0569175	1.85793e-36	1.58688e-33		WBGene00010470	cdr-4	1706.89	679.76	643.465	2038.52	1891.18	745.758	2015.74	619.487	1292.6	-1.50044	0.0765141	7.32562e-87	8.66726e-84
WBGene00001692	grd-3	3018.5	2847.25	2985.15	2951.64	5158.5	5142.63	4958.35	5116.35	4022.3	-0.785652	0.0336591	1.71895e-121	2.08176e-118		WBGene00015400	cyp-35A2	1486.93	960.39	1539.76	991.525	1674.33	998.611	1636.59	903.219	1273.92	-0.708703	0.0575415	4.05353e-36	3.27995e-33		WBGene00002269	lec-6	8056.86	4918.74	4643.73	8935.64	8576.95	4606.71	8187.07	4828.59	6594.29	-0.825893	0.0427879	4.18464e-84	4.62096e-81
WBGene00013874	ZC376.2	510.405	532.793	490.909	478	1297.62	1364.47	1379.13	1427.83	935.144	-1.43624	0.0625084	5.64542e-118	6.29299e-115		WBGene00000781	cpr-1	7210.01	4058.89	7003.51	4683.95	6230.71	3995.88	6787.88	3925.23	5487.01	-0.69958	0.0584983	3.27826e-34	2.52e-31		WBGene00019967	cyp-33C8	761.557	233.103	183.232	774.533	887.237	243.327	796.569	203.111	510.334	-1.88957	0.10076	1.17256e-79	1.21389e-76
WBGene00004747	sdc-3	2836.67	2982.38	2762.69	2830.23	5367.08	5368.08	5761.87	5283.44	4149.06	-0.929122	0.0404304	5.88907e-118	6.29299e-115		WBGene00021070	cpr-8	633.068	1110.14	566.712	1110.51	621.789	1393.9	591.483	1147.8	896.925	0.968576	0.0812434	4.90888e-34	3.59377e-31		WBGene00001099	dsc-4	3085.96	1729.33	1711.35	3130.97	3095.51	1871.7	3235.08	1795.59	2456.94	-0.81461	0.0439839	1.18034e-77	1.15007e-74
WBGene00006925	vit-1	15015.8	13148	14781.9	12532	32569.4	32370.6	35879.4	34906.1	23900.4	-1.28315	0.0563889	2.95647e-116	2.98374e-113		WBGene00009877	F49C12.7	648.058	204.15	453.282	220.933	609.832	189.598	508.535	213.75	381.017	-1.40245	0.119938	7.02966e-33	4.50309e-30		WBGene00044206	T26H5.9	346.819	9.86955	26.771	476.503	376.603	30.9852	342.673	20.1508	203.797	-4.09746	0.222544	1.6462e-76	1.51487e-73
WBGene00016425	C34H4.2	1159.87	1257.15	1007.45	1064.89	270.159	294.84	278.811	255.459	698.579	2.02449	0.0889968	7.71871e-116	7.3799e-113		WBGene00044107	F58G6.9	846.678	1422.61	952.137	1448.26	958.008	1593.63	881.054	1472.64	1196.88	0.699711	0.0600884	1.35867e-32	8.35527e-30		WBGene00011668	clec-47	945.795	301.554	243.817	932.742	899.463	297.995	1129.93	246.298	624.7	-1.82898	0.102648	2.72407e-72	2.25607e-69
WBGene00007440	C08E8.4	440.932	539.354	551.592	653.395	19.284	19.344	36.5394	22.9185	285.42	4.47534	0.197603	1.00118e-114	9.09376e-112		WBGene00020311	T07D3.9	1850.63	2733.84	1752.37	2639.58	1971.48	2659.65	1801.68	2595.84	2250.63	0.520075	0.044643	1.45314e-32	8.5925e-30		WBGene00006925	vit-1	14149.5	28044.2	25958.1	12417	13966.4	30417	11914.4	29504.5	20796.4	1.11217	0.0628753	3.13082e-71	2.46947e-68
WBGene00007331	pho-11	849.269	880.791	764.824	617.667	4818.41	5052.77	4667.36	5467.2	2889.79	-2.67214	0.119286	1.88272e-112	1.62864e-109		WBGene00010962	ctc-3	72885.3	47209	69595.9	48396.5	63342.7	44727.7	72721.2	50894.4	58721.6	-0.534415	0.0483369	1.25587e-29	6.8956e-27		WBGene00044696	F52E1.14	6677.26	4158.79	3830.06	7018.65	6832.98	3786.65	7447.57	4027.43	5472.42	-0.821521	0.0464364	9.44241e-71	7.10928e-68
WBGene00019105	asp-8	1385.05	1316.52	1423.37	1262.74	455.561	502.303	423.858	443.187	901.575	1.55778	0.0696465	5.51218e-112	4.55156e-109		WBGene00016004	C18H9.6	590.93	262.249	540.722	244.213	650.989	311.539	543.716	281.242	428.2	-1.05986	0.0979093	1.35364e-28	7.17618e-26		WBGene00006533	tba-7	625.185	224.325	197.759	684.623	631.55	204.506	654.537	239.225	432.714	-1.57512	0.0908159	1.29393e-68	9.31853e-66
WBGene00010470	cdr-4	1804.06	2149.78	1993.49	2111.63	632.179	750.972	657.83	657.69	1344.7	1.57359	0.0716445	3.72983e-108	2.94592e-105		WBGene00017658	F21C10.9	703.986	368.157	723.427	409.165	780.336	287.708	724.746	375.959	546.686	-1.00828	0.0955215	2.39807e-27	1.22893e-24		WBGene00045416	Y37H2A.14	1223.37	152.925	77.3415	1686.25	1435.33	119.068	1588.45	115.774	799.813	-3.64919	0.212805	3.13547e-67	2.16399e-64
WBGene00001772	gst-24	702.092	771.504	1190.82	994.69	69.0411	69.7727	73.133	92.6105	495.458	3.56817	0.168231	6.42427e-101	4.86264e-98		WBGene00018314	F41H10.1	369.851	172.423	334.934	129.819	334.407	124.25	374.909	159.259	249.982	-1.2545	0.120569	1.18809e-26	5.89217e-24		WBGene00020662	T21H3.1	20749.6	12219.7	10661.1	19215	19981.6	11545.7	20164.1	12010.9	15818.4	-0.782041	0.0455426	3.85761e-67	2.5559e-64
WBGene00002986	lig-4	1080.51	1198.41	1125.3	1089.64	2342.72	2292.85	2424.65	2548.11	1762.77	-1.09075	0.0528758	1.28034e-95	9.30349e-93		WBGene00001758	gst-10	1188.37	1990.68	1007.11	1838.28	975.391	1769.48	1220.06	1883.11	1484.06	0.75259	0.0727813	2.66234e-26	1.24033e-23		WBGene00002271	lec-8	5271.27	2686.19	2460.17	5783.72	4794.59	2495.93	5168.43	2711.46	3921.47	-1.01494	0.0598461	1.12441e-65	7.16338e-63
WBGene00011668	clec-47	996.768	980.826	945.399	1180.29	2539.98	2642.14	2444.42	2547.35	1784.65	-1.30788	0.0640356	5.41546e-94	3.78374e-91		WBGene00015052	clec-52	276.794	106.324	263.051	119.608	263.259	75.2599	285.345	102.92	186.57	-1.40905	0.137621	6.69363e-26	3.0267e-23		WBGene00010660	K08D8.6	3023.43	1662.5	1696.56	3189.9	2989.93	1564.68	2790.68	1602.57	2315.03	-0.873336	0.0522992	1.06428e-63	6.52913e-61
WBGene00044644	B0205.13	1000.89	974.081	1081.24	1014.66	307.685	216.328	291.666	258.813	643.169	1.91201	0.0937937	1.56874e-93	1.05547e-90		WBGene00008167	acox-1.5	1418.69	644.726	1112.82	629.522	1065.05	593.236	1123.4	660.033	905.934	-0.885513	0.08796	4.08774e-25	1.79557e-22		WBGene00000022	abt-4	2294.72	1003.65	980.256	2032.48	2309.19	1016.57	2351.61	1147.98	1642.06	-1.1076	0.0668379	7.34137e-63	4.34294e-60
WBGene00002273	lec-10	7409.22	7639.23	7365.26	7459.03	4086.41	4233.63	4304.48	4611.71	5888.62	0.790058	0.0392135	3.4952e-91	2.26764e-88		WBGene00007875	dod-24	991.161	584.804	1157.21	503.317	892.313	506.962	930.812	556.661	765.405	-0.867509	0.0877371	2.38829e-24	1.01993e-21		WBGene00016769	C49C8.5	1683.25	888.746	789.489	1623.2	1651.68	806.551	1842.71	858.204	1267.98	-1.01668	0.0630866	1.30392e-59	7.44765e-57
WBGene00270321	Y41C4A.32	2785.14	2958.01	2829.5	5309.6	96.3813	90.2892	79.7132	71.393	1777.5	5.33463	0.269007	8.60772e-89	5.39199e-86		WBGene00009578	F40F8.5	3250.48	5090.83	3486.32	4710.66	3437.18	5700.01	3522.58	4807.45	4250.69	0.557791	0.0563948	2.7348e-24	1.13635e-21		WBGene00010204	F57F5.1	30481.7	18598.8	20158.2	29539.5	29734.1	18143.9	29381.5	19929.9	24496	-0.629461	0.0390198	2.13271e-59	1.17754e-56
WBGene00011399	T03F6.3	5184.59	5572.23	5387.61	5423.84	3316.37	3388.65	3434.56	3314.25	4377.76	0.678885	0.0343196	5.40693e-88	3.27407e-85		WBGene00007362	cyp-35C1	641.317	375.885	630.101	412.684	631.097	363.914	655.029	387.333	512.17	-0.718749	0.0730437	4.25711e-24	1.67817e-21		WBGene00001770	gst-22	504.68	158.412	132.862	526.875	515.233	137.485	431.801	143.411	318.845	-1.7805	0.111436	1.1459e-58	6.12281e-56
WBGene00044206	T26H5.9	363.775	498.689	393.957	356.244	10.1964	5.36024	17.7123	7.06367	206.625	5.32065	0.268956	9.38454e-88	5.49934e-85		WBGene00019978	hacd-1	2517.9	3817.01	2780.33	3989.29	2530.86	3614.38	2548.69	3453.7	3156.52	0.50946	0.0517411	4.46663e-24	1.71675e-21		WBGene00012664	Y39B6A.1	18875.8	7504.69	8418.39	16884.8	14606.3	7778.91	16568.4	8219.87	12357.2	-1.06023	0.0668658	8.91548e-58	4.61488e-55
WBGene00000781	cpr-1	14401.1	13955.3	13212.9	15640.7	7195.49	6983.87	6236.17	6772.23	10549.7	1.0678	0.0542988	3.29409e-87	1.87001e-84		WBGene00016877	C52D10.3	361.814	595.023	300.186	752.541	324.809	834.754	246.392	693.166	513.586	1.20244	0.123101	7.17847e-24	2.69175e-21		WBGene00006470	tag-120	968.901	511.057	442.451	1093.45	1047.5	470.312	1051.25	462.543	755.933	-1.13393	0.0716258	1.2801e-57	6.42535e-55
WBGene00044081	D1086.11	9571.44	9597.64	9686.33	10053.5	6490.85	6675.89	6516.11	6363.79	8119.45	0.577109	0.0292878	3.63024e-87	1.99839e-84		WBGene00000136	amt-4	1598.83	2624.98	1646.91	2414.69	1428.7	2217.01	1385.64	2293.5	1951.28	0.642471	0.0671626	6.32515e-23	2.26146e-20		WBGene00022848	ZK1055.7	1922.29	982.97	973.303	2275.86	2328.48	1086.79	2131.86	986.888	1586.05	-1.09559	0.0695881	5.36666e-57	2.61451e-54
WBGene00022848	ZK1055.7	2037.15	2406.48	2460.99	2239.23	797.232	832.005	931.44	911.602	1577.02	1.39167	0.0714278	1.06973e-85	5.71548e-83		WBGene00010124	F55G11.4	1032.26	582.095	919.735	498.075	997.585	643.422	942.486	531.055	768.339	-0.771437	0.0808166	7.33232e-23	2.50505e-20		WBGene00019515	ugt-19	1174.05	480.498	365.433	1108.57	1194.74	486.66	1164.48	474.285	806.09	-1.35042	0.0860826	1.12506e-56	5.32444e-54
WBGene00010822	M01G12.9	658.7	658.01	792.986	771.443	194.91	181.923	195.787	184.07	454.729	1.92016	0.098885	3.5617e-85	1.84862e-82		WBGene00020128	R193.2	2715.15	4598.52	2235.68	4824.8	2670.87	5982.03	2350.48	5452.56	3853.76	1.0459	0.111073	3.39758e-22	1.11137e-19		WBGene00009393	clec-62	1457.68	709.601	671.704	1522.75	1434.7	632.589	1665.34	753.768	1106.02	-1.12635	0.0725987	1.69429e-55	7.79561e-53
WBGene00022645	ZK6.11	19541.7	22081.7	19725.1	24262.8	8913.46	10006.2	9026.74	8974.15	15316.5	1.20365	0.0632754	2.48853e-82	1.25574e-79		WBGene00006404	tag-10	4106.86	6273.97	3691.39	5849.81	3857.27	7016.59	3632.62	5278.58	4963.39	0.661395	0.070764	5.25997e-22	1.68473e-19		WBGene00010850	M04C3.1	1621.03	874.568	885.839	1723.48	1764.48	932.214	1895.84	926.902	1328.04	-0.944471	0.0610178	3.57856e-55	1.60203e-52
WBGene00006493	ivns-1	2187.27	2104.75	1922.35	2029.34	3966.12	3941.46	3686.71	3773.35	2951.42	-0.89551	0.0473355	6.75087e-81	3.3145e-78		WBGene00019963	R08E5.3	1552.85	1096.42	1462.71	995.976	1583.01	1089.56	1546.82	1124.17	1306.44	-0.502216	0.0536891	5.38682e-22	1.69014e-19		WBGene00019744	M02H5.8	1376.72	617.848	541.508	1656.59	1687.41	622.735	1432.48	658.265	1074.2	-1.32499	0.0856714	3.72545e-55	1.62391e-52
WBGene00013847	cls-3	4031.19	4108.27	4126.22	3589.94	1751.35	1829.71	1994.51	1694.97	2890.77	1.12096	0.059593	4.41177e-80	2.10906e-77		WBGene00007331	pho-11	4828.59	8732.46	5067.47	7577.73	4663.71	6845.12	5480.35	7868.24	6382.96	0.616446	0.0661204	6.40061e-22	1.96806e-19		WBGene00016425	C34H4.2	1094.88	429.934	385.256	1189.35	953.552	354.783	1014.2	418.954	730.114	-1.40969	0.091233	4.15928e-55	1.76652e-52
WBGene00020182	ugt-53	108.964	93.1308	70.6843	75.6256	448.673	500.403	531.046	465.094	286.703	-2.47275	0.133175	2.64977e-78	1.23425e-75		WBGene00000785	cpr-5	14949.4	20526.3	13855.2	19105.3	14358.9	23664.6	14150.4	19661.6	17534	0.523818	0.0560171	7.04798e-22	2.12462e-19		WBGene00000522	clc-1	970.576	420.171	370.719	1096.8	1089.54	435.292	1040.25	480.888	738.028	-1.28861	0.0839031	1.99052e-54	8.24272e-52
WBGene00019619	asp-14	778.078	758.983	762.861	534.745	2578.98	2643.56	2221.24	2439.85	1589.79	-1.78886	0.0966904	1.38895e-77	6.30793e-75		WBGene00004000	pgp-6	651.372	301.152	797.965	314.149	564.047	230.677	626.311	327.982	476.707	-1.14353	0.123025	7.23918e-22	2.14029e-19		WBGene00017071	aagr-1	819.044	1528.89	1645.18	916.555	806.012	1588.62	859.159	1574.92	1217.3	0.892085	0.0585341	1.46681e-53	5.92593e-51
WBGene00019967	cyp-33C8	806.939	818.864	937.59	836.565	255.426	216.32	290.955	217.563	547.528	1.78793	0.0996613	3.41032e-73	1.51102e-70		WBGene00018459	F45D11.14	1151.46	1871.19	1397.22	2123.25	1139.52	2227.69	1280.05	1902.93	1636.66	0.695111	0.0748219	8.71244e-22	2.48046e-19		WBGene00000830	ctl-1	2068.74	1171.85	1145.89	1946.37	2016.51	1034.57	1919.65	1073.07	1547.08	-0.839983	0.0554703	6.69285e-53	2.63953e-50
WBGene00017691	ilys-5	18867.8	17764.7	18148.1	17367.2	29204.5	27911.5	26705.2	28250.4	23027.4	-0.632163	0.0355476	1.21605e-71	5.25969e-69		WBGene00016204	gsto-1	205.515	757.862	197.138	695.601	220.287	1294.06	214.817	770.979	544.532	2.02258	0.224838	1.15189e-20	3.16236e-18		WBGene00008167	acox-1.5	1929.03	649.783	834.819	2173.95	1829.75	627.339	1839.1	569.01	1306.6	-1.5218	0.101829	8.71513e-52	3.35715e-49
WBGene00004809	skr-3	1696.73	1815.39	1895.07	1806.47	912.479	783.52	796.764	871.475	1322.24	1.09272	0.0619338	1.01979e-70	4.30826e-68		WBGene00003431	msp-33	843.785	487.064	784.482	354.894	665.447	377.05	766.526	389.633	583.61	-0.909675	0.102219	2.81104e-20	7.58192e-18		WBGene00010749	K10D11.5	861.235	414.533	415.881	1092.06	1058.78	388.728	1107.66	412.59	718.934	-1.32538	0.0899327	2.26427e-50	8.52394e-48
WBGene00002269	lec-6	8480.55	9384.64	9003.8	8541.31	4713.94	4921.48	4951.12	5370.67	6920.94	0.822876	0.0467572	2.57139e-70	1.06163e-67		WBGene00007601	C15C6.2	458.03	253.5	480.795	239.205	394.912	226.728	477.955	261.386	349.064	-0.865897	0.0978107	4.48349e-20	1.18843e-17		WBGene00007073	ugt-2	551.755	241.894	214.891	525.833	568.083	225.891	568.934	232.898	391.272	-1.26324	0.0879283	5.42904e-48	1.99837e-45
WBGene00015400	cyp-35A2	553.669	592.764	612.599	444.126	1484.19	1535.69	1676.08	1633.09	1066.53	-1.5076	0.0857818	2.96624e-70	1.19744e-67		WBGene00019368	K03H6.2	159.516	307.066	157.135	310.195	146.449	335.011	180.503	316.853	239.091	0.951755	0.107784	5.85141e-20	1.52474e-17		WBGene00000831	ctl-2	2372.18	1213.38	1167.98	2553.03	2500.95	1406.24	2314.95	1332.39	1857.64	-0.919649	0.064483	2.94588e-47	1.06077e-44
WBGene00017071	aagr-1	869.268	970.596	853.144	903.77	1787.71	1696.74	1751.19	1728.05	1320.06	-0.948563	0.0541847	1.06047e-69	4.18794e-67		WBGene00019605	ctsa-1	815.022	1811	860.8	1884.88	903.747	2500.42	803.727	1696.76	1409.54	1.19214	0.137912	2.68802e-19	6.7747e-17		WBGene00007506	C10C5.2	278.386	65.975	52.6264	301.008	346.83	69.7922	273.3	44.6595	179.072	-2.3421	0.164609	4.4375e-47	1.56389e-44
WBGene00001398	fat-6	22762.1	21391	22246.4	24534.4	10729.7	12747	11361.4	10650.3	17052.8	0.9939	0.0568226	1.44555e-69	5.5872e-67		WBGene00002255	lbp-3	1550.9	2111.83	1473.57	1967.18	1411.58	2404.69	1479.87	2082.81	1810.3	0.52038	0.0620629	3.19545e-18	7.55798e-16		WBGene00001758	gst-10	773.166	1626.98	1712	697.594	671.71	1451.41	600.889	1444.79	1122.32	1.17231	0.0841093	2.47519e-45	8.54145e-43
WBGene00018910	F56A4.2	1988.69	2038.74	2129.97	1780.31	3690.27	3609.09	3787.26	3734.33	2844.83	-0.893097	0.0513488	8.82426e-69	3.27146e-66		WBGene00003999	pgp-5	611.083	430.462	629.731	407.753	621.362	353.939	625.164	367.124	505.827	-0.66011	0.079324	4.66762e-18	1.08727e-15		WBGene00005003	spp-18	1122.86	442.33	397.819	1215.17	889.601	430.025	1094.51	393.361	748.21	-1.36221	0.0986413	1.27351e-44	4.30498e-42
WBGene00021224	clec-209	1988.69	2038.74	2129.97	1780.31	3690.27	3609.09	3787.26	3734.33	2844.83	-0.893097	0.0513488	8.82426e-69	3.27146e-66		WBGene00000784	cpr-4	12435.1	16507.6	11864.7	16185.7	12175.9	20417.5	12266.6	16677.7	14816.4	0.50455	0.0606375	5.51762e-18	1.26609e-15		WBGene00010605	K06G5.1	11161.5	7598.52	7054.57	11326.6	10660.8	6852.91	12145.7	7249.76	9256.28	-0.645386	0.0473336	9.16581e-44	3.03645e-41
WBGene00009595	cbp-3	1387.84	1620.87	1666.2	1587.01	516.692	565.195	666.656	579.54	1073.75	1.4213	0.0819793	1.56719e-68	5.69391e-66		WBGene00003095	lys-6	370.101	116.425	318.713	170.998	291.294	144.979	313.083	163.774	236.171	-1.08285	0.131431	9.28156e-18	2.087e-15		WBGene00000991	dhs-28	4794.23	3108.6	3113.34	4544.54	4530.33	2843.84	4408.9	2965.44	3788.65	-0.598383	0.0443502	2.04242e-42	6.63346e-40
WBGene00003734	nhx-6	1069.54	1161.65	1123.12	706.403	0	5.24699	2.58085	4.29277	509.104	8.34257	0.476905	1.92823e-68	6.86829e-66		WBGene00001387	far-3	300.146	153.583	332.638	174.051	310.2	175.129	296.345	153.739	236.979	-0.888825	0.10808	1.03541e-17	2.27405e-15		WBGene00006927	vit-3	74197.3	126055	132214	70426.1	69771.4	130710	55498.8	132278	98893.8	0.935185	0.0700086	3.15682e-42	1.00557e-39
WBGene00007964	cyp-25A2	2430.14	2595	2204.21	2169.19	966.049	1043.84	833.085	865.01	1638.32	1.33363	0.0781444	1.78338e-66	6.23017e-64		WBGene00001399	fat-7	4242.99	2235.35	4506.3	1939.82	3454.78	1660.22	4672.36	2083.36	3099.4	-1.0616	0.129614	1.2797e-17	2.771e-15		WBGene00045457	F33H12.7	403.478	20.9077	8.33105	478.319	611.423	31.9262	621.473	23.355	274.901	-4.58865	0.344006	8.67368e-42	2.71077e-39
WBGene00005003	spp-18	1168.83	1262.11	923.539	1129.23	350.179	335.473	307.415	271.29	718.508	1.81454	0.10677	4.80134e-66	1.64568e-63		WBGene00019565	cyp-35A3	148.613	52.7004	121.925	57.7776	162.464	48.8969	150.951	34.6333	97.2453	-1.5533	0.190906	2.00554e-17	4.28238e-15		WBGene00012538	Y37A1B.5	2815.78	1502.74	1593.35	2779.89	2554.52	1648.9	3021.33	1689.87	2200.8	-0.78619	0.0602612	5.50893e-40	1.68981e-37
WBGene00009971	F53C11.1	1150.5	1323.11	1235.07	1293.61	585.331	583.684	586.109	602.242	919.956	1.07847	0.0633705	4.94739e-66	1.66434e-63		WBGene00003465	msp-78	996.799	604.596	1029.64	407.387	771.906	459.192	948.875	434.998	706.674	-0.949759	0.117049	2.2573e-17	4.75394e-15		WBGene00021872	clec-85	1303.68	835.687	730.286	1343.84	1323.77	792.523	1363.64	774.739	1058.52	-0.759941	0.05825	5.84102e-40	1.7591e-37
WBGene00001598	glh-1	12423.9	12357.6	12754	13088.4	19899.2	18144.8	18613.5	19047.4	15791.1	-0.576616	0.0345385	1.34057e-63	4.34873e-61		WBGene00045418	F15B9.10	971.793	1517.78	1063.33	1356.01	1042.17	1611.71	1020.24	1411.75	1249.35	0.511853	0.0631281	3.1825e-17	6.61185e-15		WBGene00022252	Y73B6BL.31	1765.89	782.882	767.642	1704.47	1410.74	743.645	1813.75	846.323	1229.42	-1.07891	0.0828879	6.20386e-40	1.83501e-37
WBGene00009069	F23A7.4	5083.42	5394.17	5061.41	4855.23	8726.84	9297.57	8995.19	8104.85	6939.84	-0.778868	0.0469002	6.43046e-63	2.0494e-60		WBGene00019644	cpt-4	120.937	26.9692	119.821	39.2192	206.58	45.1248	256.779	38.2924	106.715	-2.16363	0.268571	4.16796e-17	8.54376e-15		WBGene00011844	T19C9.8	675.716	82.4804	27.313	728.705	658.134	44.5726	710.564	52.0866	372.446	-3.70613	0.286279	1.14296e-39	3.32139e-37
WBGene00011190	swt-6	590.154	830.39	660.187	587.116	94.7354	142.399	139.832	128.022	396.604	2.38959	0.144309	7.53661e-63	2.36052e-60		WBGene00022002	Y59E9AR.7	1485.04	1027.55	1518.24	785.187	1234.61	809.215	1482.76	860.673	1150.41	-0.697493	0.0875963	8.97324e-17	1.79162e-14		WBGene00003561	ncr-1	1197.95	667.487	681.379	1133.59	1312.82	651.373	1336.56	637.47	952.33	-0.907262	0.0703643	3.71803e-39	1.06182e-36
WBGene00006533	tba-7	662.065	723.398	667.013	687.011	242.809	238.827	170.409	217.607	451.142	1.63992	0.101216	3.50344e-60	1.0787e-57		WBGene00010058	F54E4.2	72.5588	182.483	70.1048	181.531	65.2341	142.021	47.6866	170.376	116.499	1.36473	0.173393	1.73323e-16	3.37301e-14		WBGene00002187	kgb-1	1584.28	981.906	1022.3	1626.16	1527.83	983.932	1655.25	928.324	1288.75	-0.698542	0.0543895	8.85435e-39	2.48582e-36
WBGene00007455	ugt-22	2944.21	2740.24	2916.96	2478.97	4983.34	4937.14	4863.78	4794.94	3832.45	-0.814707	0.0505748	2.28074e-59	6.90533e-57		WBGene00009031	F21H7.5	629.514	325.012	529.454	277.412	444.567	277.488	527.297	265.088	409.479	-0.873642	0.111978	3.09564e-16	5.94905e-14		WBGene00007153	clec-41	10092.3	5947.85	5233.98	11974.1	9611.15	4891.79	10652.2	5839.98	8030.43	-0.939368	0.0738265	3.13594e-38	8.65728e-36
WBGene00020456	fbxa-60	1144.86	1474.16	1195.06	1128.56	458.494	469.945	478.141	432.657	847.734	1.41768	0.0902744	9.27188e-57	2.7612e-54		WBGene00003446	msp-53	877.64	585.067	940.476	473.279	732.658	484.461	986.503	521.523	700.201	-0.756431	0.0974699	4.59973e-16	8.73039e-14		WBGene00018237	irg-7	36616.2	26970.7	24014.1	35428	35945.3	24225.5	38128.3	24874.8	30775.4	-0.540731	0.0424518	4.87464e-38	1.32366e-35
WBGene00020139	eppl-1	386.329	375.683	482.398	499.955	1343.97	1202.58	1253.7	1130.1	834.339	-1.48725	0.0953838	5.14594e-56	1.50776e-53		WBGene00015688	C10G11.8	720.198	452.012	665.713	352.848	576.933	324.418	738.887	361.817	524.103	-0.836122	0.108371	6.0717e-16	1.13837e-13		WBGene00008296	cdr-2	816.177	443.265	405.658	840.73	759.008	376.767	812.327	363.415	602.168	-1.01077	0.0808415	4.83154e-37	1.2908e-34
WBGene00018350	ifo-1	2828.3	2873.57	2709	2962.05	1555.12	1658.94	1367.7	1473.77	2178.56	0.902095	0.0578028	5.89265e-56	1.69914e-53		WBGene00016440	gipc-1	901.248	481.823	724.71	335.19	613.698	357.421	831.05	339.816	573.12	-0.99171	0.13059	1.50982e-15	2.76332e-13		WBGene00017881	asp-13	4480.44	8167.66	8104.78	4170.89	3845.54	6538.05	4123.12	8122.84	5944.17	0.886202	0.0713356	1.50589e-36	3.95931e-34
WBGene00189949	Y48G1C.13	34.5061	48.2129	43.9906	34.0046	232.758	256.012	281.478	240.204	146.396	-2.61323	0.168853	4.88749e-55	1.38728e-52		WBGene00009682	msd-2	644.337	434.667	656.852	304.545	548.868	349.757	636.188	334.193	488.676	-0.7821	0.105437	6.06335e-15	1.08393e-12		WBGene00007440	C08E8.4	417.003	92.3886	51.3934	511.221	523.061	121.084	623.457	109.46	306.133	-2.43691	0.196772	1.75555e-36	4.54359e-34
WBGene00002258	lbp-6	15584.3	15371.8	15226.5	16653.2	10972.4	10572.9	10126.6	10685.6	13149.2	0.565101	0.0369344	1.36019e-53	3.80142e-51		WBGene00003435	msp-40	994.364	607.399	1033.82	474.156	729.769	472.251	1065.22	530.417	738.424	-0.849407	0.114759	7.2859e-15	1.28751e-12		WBGene00008341	ttr-44	245.367	574.377	722.125	242.357	265.661	688.095	309.428	750.749	474.77	1.35053	0.109843	5.63109e-36	1.43498e-33
WBGene00004990	spp-5	7082.92	7248.78	6928.82	6577.69	10434.3	9941.8	9968.46	10125.1	8538.49	-0.536198	0.0352393	5.01898e-53	1.38143e-50		WBGene00014116	ZK858.2	195.257	96.8304	179.941	77.3013	164.904	85.6331	182.073	69.1905	131.391	-1.10378	0.15079	1.22916e-14	2.12327e-12		WBGene00012910	Y46G5A.20	255.434	58.3268	67.6145	347.043	306.272	82.2241	253.754	74.2927	180.62	-2.01464	0.164261	9.17292e-36	2.30212e-33
WBGene00016558	pks-1	1713.77	1534.44	1734.63	1803.03	3042.69	2851.43	3178.55	3117.44	2372	-0.839721	0.0554556	7.93297e-53	2.1509e-50		WBGene00007691	C23H4.2	51.3461	123.029	62.5924	190.898	77.3502	182.406	60.9003	174.102	115.328	1.37179	0.187858	1.40162e-14	2.39428e-12		WBGene00011399	T03F6.3	4902.75	3430.43	3556.26	5281.05	5108.42	3565.8	5174.81	3770.65	4348.77	-0.509886	0.0414268	1.18943e-35	2.94056e-33
WBGene00019515	ugt-19	1244.06	1172.06	1262.58	1222.99	597.796	563.953	672.617	557.554	911.701	1.0294	0.0683183	2.03306e-52	5.35254e-50		WBGene00009681	gipc-2	1237.68	782.265	1058.97	544.535	951.005	606.692	1239.13	603.081	877.919	-0.797604	0.109362	1.52906e-14	2.58328e-12		WBGene00004809	skr-3	1607.63	964.86	992.832	1723.89	1800.39	1104.51	1726.9	973.982	1361.88	-0.756093	0.0616331	1.24175e-35	3.02476e-33
WBGene00019780	M60.4	1430.15	1436.99	1448.18	1372.56	853.875	837.323	825.565	825.39	1128.75	0.7624	0.0507003	4.55787e-52	1.16617e-49		WBGene00019619	asp-14	2584.08	1143.84	2650.88	1097.39	2219.2	686.613	2445.39	1056.83	1735.53	-1.26706	0.174817	1.98026e-14	3.30919e-12		WBGene00006928	vit-4	99298.8	135386	136048	96399.8	97072.2	140166	86135.8	140862	116421	0.534552	0.0438315	1.50135e-35	3.60411e-33
WBGene00011737	sqst-1	2710.94	2869.42	2731.46	2691.52	1254.24	1374.61	1400.88	1593.38	2078.31	0.960833	0.0640569	6.72396e-52	1.67325e-49		WBGene00003449	msp-56	729.911	447.329	745.98	399.216	546.393	352.482	710.692	351.725	535.466	-0.792881	0.110311	3.38164e-14	5.53079e-12		WBGene00019963	R08E5.3	1320.2	680.546	684.388	1187.44	1400.64	680.726	1567.75	669.033	1023.84	-0.99885	0.0821981	3.85481e-35	9.12158e-33
WBGene00002263	lea-1	19534.8	19730.5	19203.5	17541.5	11156.9	10974	11453.8	12551	15268.3	0.714995	0.048377	2.31314e-50	5.67844e-48		WBGene00003464	msp-77	819.09	502.833	847.193	349.823	614.321	385.561	884.262	445.924	606.126	-0.880039	0.124083	6.81345e-14	1.0799e-11		WBGene00016862	C52A10.1	1383.99	887.319	840.484	1483.9	1622.11	854.098	1648.81	785.88	1188.32	-0.856011	0.0706239	6.49109e-35	1.51434e-32
WBGene00007506	C10C5.2	294.899	318.154	366.418	286.948	61.362	77.4739	80.7681	66.9488	194.121	2.1366	0.146392	1.84121e-49	4.45965e-47		WBGene00003468	msp-113	1192.4	831.689	1259.71	580.117	980.428	625.923	1140.47	662.974	909.213	-0.73454	0.103752	7.43425e-14	1.16627e-11		WBGene00045067	F07C6.6	180.277	36.3238	28.9362	189.426	170.035	29.0024	147.975	37.1395	102.39	-2.36279	0.195242	7.02713e-35	1.61663e-32
WBGene00000841	cul-6	532.049	573.521	701.572	541.88	185.967	203.133	186.741	181.968	388.354	1.62279	0.111785	6.42301e-49	1.53527e-46		WBGene00003466	msp-79	859.998	552.538	680.549	407.44	729.645	405.358	814.265	440.475	611.283	-0.747944	0.106319	1.00741e-13	1.56444e-11		WBGene00009493	hrg-4	200.981	687.71	689.669	178.768	195.363	479.763	236.519	618.716	410.936	1.59078	0.132012	1.02317e-34	2.32162e-32
WBGene00006470	tag-120	1024.78	1153.95	1104.94	1102.04	405.024	491.902	513.646	517.047	789.166	1.17786	0.0814381	1.4652e-48	3.45673e-46		WBGene00009884	F49C12.15	843.499	548.961	806.467	423.195	641.751	393.874	880.534	436.76	621.88	-0.788605	0.113942	2.26223e-13	3.44351e-11		WBGene00019327	zip-2	3591.57	2233.54	1964.75	3482.47	3748.69	2406.39	3718.65	2082.43	2903.56	-0.734186	0.0608138	1.34512e-34	3.01088e-32
WBGene00003999	pgp-5	283.488	256.929	218.414	233.193	606.2	624.204	618.183	619.988	432.575	-1.30837	0.0907379	2.41378e-48	5.62163e-46		WBGene00017131	E04F6.15	340.147	211.538	348.255	203.142	374.941	211.657	358.636	243.202	286.44	-0.678905	0.0996458	5.22493e-13	7.72385e-11		WBGene00015338	catp-2	714.784	103.1	81.2863	693.029	592.304	112.24	362.816	136.243	349.475	-2.41626	0.200899	1.37755e-34	3.04237e-32
WBGene00015295	acl-12	973.851	1064.08	1135	1212.6	499.128	489.597	528.862	517.088	802.527	1.09815	0.0768716	2.05652e-47	4.72896e-45		WBGene00019830	hrg-1	765.869	2211.92	624.527	1918.4	1023.45	3035.21	782.212	2099.84	1557.68	1.47508	0.218411	6.86228e-13	9.85988e-11		WBGene00002058	ifd-2	956.712	516.802	550.501	949.826	993.554	567.067	1093.13	555.059	772.832	-0.854344	0.0710757	2.17882e-34	4.68701e-32
WBGene00001694	grd-5	1528	1384.52	1550.86	1576.84	2554.87	2505.33	2424.74	2421.41	1993.32	-0.708918	0.049541	2.1782e-47	4.94614e-45		WBGene00012087	T27E7.1	260.757	151.603	286.571	135.005	218.058	126.107	259.885	142.917	197.613	-0.851593	0.127109	1.05761e-12	1.50553e-10		WBGene00008199	C49C3.9	1204.11	678.422	505.419	1417.84	1365.52	485.676	1513.3	608.26	972.318	-1.25635	0.105319	4.94719e-34	1.05058e-31
WBGene00019914	clec-150	3487.95	3545.68	3232.61	3529.47	5446.11	5376.25	5030.22	5139.71	4348.5	-0.602281	0.0423072	7.80523e-47	1.75049e-44		WBGene00016752	C48E7.7	723.645	495.297	792.096	343.911	598.327	354.102	725.613	290.13	540.39	-0.900558	0.135593	1.34899e-12	1.9027e-10		WBGene00021487	comt-3	789.16	460.734	424.012	845.257	875.532	477.267	812.555	424.237	638.594	-0.88605	0.0742432	6.36133e-34	1.33379e-31
WBGene00016769	C49C8.5	1784.13	1716.66	1745.97	1935.85	1021.71	1091.62	990.915	1027.57	1414.3	0.789873	0.0555999	8.39804e-47	1.86047e-44		WBGene00013474	Y69E1A.2	965.168	666.858	880.129	472.41	770.609	509.757	991.66	477.436	716.753	-0.73536	0.110925	1.70873e-12	2.38818e-10		WBGene00015955	C18B2.4	1812.28	962.271	871.909	1849.3	1521.03	865.289	1605.66	932.243	1302.5	-0.891072	0.0747925	7.41571e-34	1.53542e-31
WBGene00018353	fbxa-182	570.81	650.386	732.873	711.255	154.595	152.882	202.404	225.445	425.081	1.83953	0.129806	9.03553e-47	1.97758e-44		WBGene00003467	msp-81	1025.75	650.27	1116.59	486.538	723.05	491.069	1021.09	529.503	755.482	-0.816155	0.123804	2.14505e-12	2.94447e-10		WBGene00011517	cgt-1	191.147	38.4848	29.477	173.446	199.926	45.5607	160.053	35.0908	109.148	-2.25322	0.190361	1.83538e-33	3.75324e-31
WBGene00020455	fbxa-59	420.189	404.807	378.563	391.011	121.19	133.271	84.1467	117.232	256.301	1.78484	0.126077	1.17008e-46	2.53044e-44		WBGene00000256	bli-6	457.965	799.16	370.855	641.34	334.055	646.298	413.444	595.656	532.347	0.730531	0.111883	3.57366e-12	4.81942e-10		WBGene00007808	best-7	878.199	494.764	468.99	954.375	866.137	459.583	1013.9	521.138	707.136	-0.919913	0.07834	5.51038e-33	1.1131e-30
WBGene00044468	Y69A2AL.2	675.641	796.09	929.941	866.624	277.916	287.313	314.854	304.556	556.617	1.45267	0.103192	3.59289e-46	7.58936e-44		WBGene00008341	ttr-44	556.269	1011.76	580.138	875.252	683.618	825.843	620.227	898.664	756.471	0.54217	0.082982	3.69822e-12	4.94404e-10		WBGene00000118	alh-12	2126.25	3144.78	3169.71	2084.2	2067.18	2902.38	2136.8	2947.26	2572.32	0.526229	0.0446572	6.48753e-33	1.29469e-30
WBGene00019731	M02D8.5	79.3929	81.5697	93.4394	93.5117	292.565	317.69	380.416	347.808	210.799	-1.92207	0.1366	3.70766e-46	7.74175e-44		WBGene00010411	H25K10.1	51.4119	143.941	57.171	142.352	61.9078	112.855	37.9676	118.457	90.758	1.26212	0.194994	4.47937e-12	5.88596e-10		WBGene00016424	C34H4.1	322.908	111.11	85.7331	331.817	311.945	113.602	361.718	130.052	221.111	-1.5689	0.134227	8.43013e-33	1.66234e-30
WBGene00015608	math-3	170.496	155.872	179.08	206.569	518.527	479.778	579.788	493.641	347.969	-1.52821	0.108877	5.47727e-46	1.13068e-43		WBGene00008541	F07A5.2	315.299	199.867	282.493	151.586	272.073	149.569	326.827	174.891	234.076	-0.794798	0.123946	7.26488e-12	9.38574e-10		WBGene00012961	Y47H10A.5	696.379	131.972	115.514	783.78	1155.59	155.024	1280.68	144.559	557.937	-2.7981	0.240702	1.54449e-32	2.97476e-30
WBGene00012664	Y39B6A.1	20015.3	17864.2	15446.6	17413.1	10180.6	9480.92	9543.28	9432.01	13672	0.865158	0.0616328	9.46853e-46	1.89017e-43		WBGene00006056	sss-1	706.676	437.887	628.384	314.436	525.526	304.838	587.588	345.133	481.308	-0.772994	0.120766	7.69808e-12	9.78102e-10		WBGene00022645	ZK6.11	18458.3	11810	9841.5	20904	18681.7	11265.4	23122.4	11606.6	15711.2	-0.854654	0.0734484	2.09622e-32	3.991e-30
WBGene00045067	F07C6.6	189.334	198.5	178.099	154.033	13.9062	27.8428	9.98153	11.4822	97.8972	3.48096	0.254279	6.67917e-44	1.30466e-41		WBGene00016447	msd-4	686.961	472.86	689.312	369.469	536.719	380.698	698.205	389.548	527.972	-0.668938	0.104848	9.30884e-12	1.16353e-09		WBGene00020182	ugt-53	102.848	269.392	344.272	88.0992	66.8961	320.868	72.0184	270.096	191.811	1.84797	0.160239	4.85571e-32	9.13978e-30
WBGene00021895	clec-84	1436.02	1411.9	1400.41	1426.12	879.91	842.329	757.261	803.545	1119.69	0.780853	0.056925	8.6198e-44	1.66582e-41		WBGene00017386	nspd-5	439.445	276.819	367.195	162.668	361.2	187.245	492.212	198.958	310.718	-0.967537	0.153804	1.49616e-11	1.84015e-09		WBGene00000781	cpr-1	13608.6	6017.78	6955.16	13216.7	12519.3	7997.83	14912	7814.02	10380.2	-0.901536	0.0794855	6.0254e-31	1.10894e-28
WBGene00001099	dsc-4	3273.13	3313.49	3274.46	3400.92	2086.16	2300.4	2244.84	2065.67	2744.88	0.60495	0.0442218	1.87997e-43	3.5949e-41		WBGene00021975	Y58A7A.1	454.994	723.607	561.823	839.592	450.036	688.781	410.537	707.976	604.668	0.630044	0.099944	1.55186e-11	1.89352e-09		WBGene00007605	hrg-7	6570.18	22684.9	21553	6805.99	6482.12	16546.6	8395.64	22205.5	13905.5	1.53189	0.135584	7.7043e-31	1.40235e-28
WBGene00018459	F45D11.14	3478.56	4685.23	3611.38	4251.13	1149.31	1393.5	1140.69	1277.29	2623.39	1.67409	0.123042	2.02663e-43	3.83498e-41		WBGene00015044	cyp-34A9	174.112	67.9895	172.192	84.1895	276.92	102.55	240.861	104.631	152.931	-1.20276	0.193749	2.46144e-11	2.91094e-09		WBGene00006628	tsp-2	164.707	19.8031	10.452	212.962	269.311	36.7854	283.554	31.8647	128.68	-3.17784	0.282039	1.23802e-30	2.20654e-28
WBGene00013947	ZK228.4	543.207	459.913	478.856	504.718	993.968	1012.06	1015.26	914.485	740.309	-0.978147	0.0720441	4.18998e-43	7.84693e-41		WBGene00013858	ssp-34	240.714	120.297	242.899	111.079	174.145	114.993	217.122	116.252	167.188	-0.879097	0.141743	2.80124e-11	3.2875e-09		WBGene00002274	lec-11	630.042	314.713	339.227	662.72	769.317	357.66	761.673	340.236	521.948	-1.04722	0.0928863	1.23888e-30	2.20654e-28
WBGene00001394	fat-2	29485.1	31967.6	29988.5	32722.4	20960.3	22030.1	22167.6	21824.6	26393.3	0.509199	0.0375457	1.16144e-42	2.15292e-40		WBGene00003463	msp-76	781.728	518.169	830.887	362.077	576.669	391.242	739.001	423.168	577.868	-0.754287	0.123283	4.72168e-11	5.41725e-09		WBGene00009433	F35E12.9	584.761	209.204	194.551	628.982	757.297	223.928	602.118	292.309	436.644	-1.4634	0.130447	1.96942e-30	3.43384e-28
WBGene00015752	C14B9.2	2818.61	2935.37	2783.61	2971.09	1940.32	1970.19	1986.47	1862.59	2408.53	0.56436	0.04167	1.37749e-42	2.52762e-40		WBGene00194703	F26B1.8	493.104	351.975	517.498	217.197	417.829	263.697	497.509	246.425	375.654	-0.80028	0.131059	4.96153e-11	5.63759e-09		WBGene00019495	sdz-24	65.4288	229.073	360.12	65.2497	38.5722	310.359	35.651	244.732	168.648	2.44507	0.21902	3.37658e-30	5.826e-28
WBGene00007228	acs-7	367.729	373.554	369.675	336.042	762.551	692.038	730.135	775.108	550.854	-1.02109	0.0757317	1.71426e-42	3.11413e-40		WBGene00009680	msd-1	846.981	531.731	735.38	342.62	589.926	390.275	785.026	377.81	574.969	-0.811706	0.132929	4.98707e-11	5.63759e-09		WBGene00009394	clec-63	28611	19558.9	16595.3	27708.7	25985.1	16533.6	29253	18346.9	22824.1	-0.642554	0.0575477	6.23725e-30	1.06509e-27
WBGene00015623	C09B8.4	310.324	239.141	281.886	215.432	677.845	716.726	832.708	821.586	511.956	-1.52307	0.113375	2.54015e-42	4.56874e-40		WBGene00019563	K09C6.9	117.327	226.816	122.709	253.32	138.493	196.8	113.243	210.123	172.354	0.811276	0.135291	9.99377e-11	1.082e-08		WBGene00011979	T24B8.5	387.247	149.638	167.367	459.783	438.786	186.59	397.589	189.932	297.116	-1.26075	0.113436	7.19926e-30	1.20453e-27
WBGene00014666	C05D12.3	5363.97	5614.54	4633.39	5271.17	2866.1	3215.67	2777.22	2856.32	4074.8	0.825909	0.0618469	1.08717e-41	1.91895e-39		WBGene00018351	F42G2.2	278.576	448.469	320.488	521.069	319.897	649.323	338.381	483.271	419.934	0.70771	0.117903	1.0252e-10	1.10219e-08		WBGene00044644	B0205.13	952.634	154.117	85.8864	929.185	1031.87	204.97	974.364	141.108	559.267	-2.68576	0.242313	7.66106e-30	1.26898e-27
WBGene00012225	W03G11.3	135.397	129.034	125.932	103.226	379.042	449.847	372.827	362.904	257.276	-1.64101	0.123129	1.08803e-41	1.91895e-39		WBGene00006039	ssp-10	398.631	230.644	385.736	192.324	277.245	188.242	387.986	211.927	284.092	-0.779143	0.130253	1.10384e-10	1.17851e-08		WBGene00015342	C02E7.10	238.82	38.3593	21.6002	271.105	253.186	29.0563	131.005	32.865	126.999	-2.83622	0.257155	1.58275e-29	2.59571e-27
WBGene00021339	Y34F4.4	246.51	312.578	316.809	327.547	86.4012	67.6737	75.3141	80.234	189.133	1.93342	0.145822	2.82331e-41	4.93157e-39		WBGene00007857	C31H5.6	1210.75	881.473	1074.99	739.623	1047.82	638.046	1167.86	795.569	944.516	-0.535263	0.0892237	1.12093e-10	1.17875e-08		WBGene00006404	tag-10	3504.55	5668.08	5155.87	3264.81	3243.64	4782.76	3525.94	5492.23	4329.74	0.632062	0.0570326	1.62873e-29	2.64492e-27
WBGene00021743	Y50D4B.4	3161.29	2833.5	2777.2	2957.51	4624.99	4924.37	4416.32	4543.31	3779.81	-0.65278	0.0493158	5.98908e-41	1.03617e-38		WBGene00017851	F27C1.1	661.946	396.811	594.859	275.222	440.418	275.699	609.78	321.408	447.018	-0.823376	0.137837	1.12708e-10	1.17875e-08		WBGene00012144	T28H10.3	3983.97	1372.26	1251.73	4763.79	4714.38	1707.07	4647.2	1818.35	3032.34	-1.53371	0.139384	2.04838e-29	3.29411e-27
WBGene00001119	dyf-3	414.722	331.54	393.334	375.029	807.596	755.809	860.563	814.961	594.194	-1.08634	0.0824048	8.1753e-41	1.40106e-38		WBGene00003432	msp-36	1027.9	650.082	891.042	490.631	700.939	473.213	1058.06	514.94	725.85	-0.752924	0.126126	1.18563e-10	1.23162e-08		WBGene00021020	W04B5.3	793.372	452.359	401.773	792.3	840.002	489.736	878.161	444.035	636.467	-0.871586	0.0790162	2.15774e-29	3.43661e-27
WBGene00008566	acox-1.3	586.086	555.178	628.055	609.414	1193.11	1130.35	1026.46	1154.59	860.406	-0.912583	0.0691441	8.27823e-41	1.40544e-38		WBGene00012781	nspd-7	319.84	183.312	271.363	149.265	241.491	168.419	289.87	145.315	221.109	-0.762885	0.127918	1.24715e-10	1.28682e-08		WBGene00021322	Y34B4A.6	4931.02	3597.71	3400.69	4850.66	4785.84	3168.38	5262.21	3442.04	4179.82	-0.536063	0.0485899	3.47736e-29	5.48561e-27
WBGene00002187	kgb-1	1678.51	1719.05	1614.37	1738.17	1074.97	1105.2	1064.3	1075.53	1383.76	0.637043	0.048208	9.61472e-41	1.61723e-38		WBGene00020223	T05A7.6	233.613	113.747	215.899	105.274	174.539	120.331	194.124	103.939	157.683	-0.841838	0.141915	1.50451e-10	1.52173e-08		WBGene00019105	asp-8	1308.26	752.176	800.083	1246.29	1348.06	656.097	1203.38	679.341	999.211	-0.812156	0.0742419	6.16099e-29	9.53744e-27
WBGene00000022	abt-4	2435.36	2152.26	2444.15	2473.65	1442.23	1470.67	1489.18	1448.12	1919.45	0.693803	0.0525825	1.10033e-40	1.83382e-38		WBGene00001754	gst-6	144.749	227.263	143.255	230.813	121.787	280.484	139.69	222.986	188.878	0.766093	0.129433	1.69689e-10	1.69402e-08		WBGene00011190	swt-6	553.12	165.135	91.6927	780.015	620.421	159.125	555.188	200.233	390.616	-1.99381	0.183006	6.53687e-29	1.00256e-26
WBGene00015955	C18B2.4	1917.85	1952.66	1605.31	1684.14	951.128	937.641	913.174	838.925	1350.1	0.965987	0.0734456	1.34707e-40	2.22462e-38		WBGene00016541	C39H7.1	465.168	310.884	469.014	193.862	378.257	267.158	480.535	250.49	351.921	-0.772933	0.130815	1.71244e-10	1.69852e-08		WBGene00045411	C25F9.11	80.6913	5.50212	7.28861	144.14	128.324	11.6093	115.746	9.55413	62.8569	-3.7178	0.339174	7.13146e-29	1.08372e-26
WBGene00008199	C49C3.9	1275.8	1498.92	1442.94	1589.21	643.645	698.444	692.553	778.661	1077.52	1.03388	0.0789142	2.6125e-40	4.27556e-38		WBGene00013700	Y106G6D.3	246.613	113.669	216.925	93.9041	165.743	109.065	192.402	106.653	155.622	-0.910878	0.154703	1.92378e-10	1.88502e-08		WBGene00004020	pho-1	2568.62	1685.26	1603.57	2385.86	2486.98	1479.74	2758.97	1663.2	2079.03	-0.655776	0.0599585	7.5971e-29	1.14398e-26
WBGene00010660	K08D8.6	3203.69	3372.56	3159.7	2930.88	1961.85	2105.13	1974.71	2055.82	2595.54	0.640512	0.0492966	1.84992e-39	3.0005e-37		WBGene00017364	clec-7	297.328	220.098	351.707	199.109	343.759	198.421	314.294	214.159	267.359	-0.618005	0.104728	1.92499e-10	1.88502e-08		WBGene00009971	F53C11.1	1082.5	730.611	609.081	1247.68	1165.2	580.468	1228.03	633.377	909.619	-0.875086	0.0808602	2.03539e-28	3.03731e-26
WBGene00000784	cpr-4	18070.9	17392.2	16989	19694.7	12410.1	11831.4	12186.6	12238.3	15101.6	0.563504	0.0434677	4.02228e-39	6.46626e-37		WBGene00016680	C45G9.9	320.014	181.101	270.598	131.981	227.863	137.349	314.497	160.3	217.963	-0.852004	0.145076	2.10495e-10	2.0482e-08		WBGene00044488	Y54G2A.45	873.748	440.463	439.99	783.93	728.752	384.488	880.973	409.571	617.739	-0.946751	0.0877747	2.64105e-28	3.90593e-26
WBGene00000982	dhs-19	610.437	517.351	510.18	578.399	1026.74	1029.92	1121.39	1061.98	807.049	-0.929843	0.0724199	7.62857e-39	1.21562e-36		WBGene00003425	msp-10	530.808	350.424	499.802	246.895	389.234	255.511	556.411	285.136	389.277	-0.758837	0.131831	4.26628e-10	4.0739e-08		WBGene00003411	mrp-5	5684.31	9127.55	8805.65	5292.75	5234.6	7764.64	5851.42	9487.83	7156.09	0.665342	0.0615226	3.70027e-28	5.42401e-26
WBGene00015338	catp-2	758.459	733.739	626.81	381.576	0	4.2995	1.12107	0.878683	313.36	8.60853	0.662788	1.42256e-38	2.24714e-36		WBGene00006040	ssp-11	487.839	296.111	451.885	199.772	327.642	229.222	471.057	233.436	337.121	-0.81743	0.142479	4.65711e-10	4.41965e-08		WBGene00012464	arrd-7	459.027	229.822	178.828	459.78	432.311	165.738	418.801	172.243	314.569	-1.22817	0.114414	4.31251e-28	6.26601e-26
WBGene00003474	mtl-2	16.1397	25.0752	25.2998	23.116	148.323	166.124	151.606	142.118	87.2252	-2.71621	0.213781	5.18429e-38	7.98116e-36		WBGene00000008	aat-7	54.1362	16.3923	66.8921	28.8872	70.7381	18.8073	68.8595	19.1383	42.9814	-1.55343	0.272041	5.68241e-10	5.32691e-08		WBGene00010790	sodh-1	1946	911.608	925.473	2020.85	2178.74	1147.51	2777.92	982.382	1611.31	-1.14966	0.107181	4.81919e-28	6.94131e-26
WBGene00022252	Y73B6BL.31	1867.37	1798.41	1487.81	1900.99	865.66	881.185	709.645	785.747	1287.1	1.10737	0.0873612	5.95132e-38	9.08501e-36		WBGene00019430	K06A5.2	536.762	363.549	448.56	256.778	447.904	241.75	507.886	300.605	387.974	-0.704975	0.123504	5.73914e-10	5.34749e-08		WBGene00015759	C14C6.5	1502.72	625.053	658.636	1606.62	1334.71	834.95	1326.35	666.515	1069.45	-1.03326	0.0963144	5.20726e-28	7.4356e-26
WBGene00015216	valv-1	333.468	481.852	404.593	363.25	90.7018	119.952	119.731	105.16	252.339	1.84715	0.145956	6.08033e-38	9.2046e-36		WBGene00013713	Y106G6G.4	212.296	125.09	191.938	83.5321	154.826	88.4205	208.448	76.5195	142.634	-0.993059	0.175145	6.5767e-10	6.03017e-08		WBGene00020674	T22B7.7	280.429	634.474	727.068	266.138	245.356	608.706	248.233	503.989	439.299	1.23095	0.115353	8.65903e-28	1.22588e-25
WBGene00016809	C50D2.6	654.353	818.252	548.054	715.785	238.423	180.777	144.602	169.064	433.664	1.87569	0.149352	2.10598e-37	3.16176e-35		WBGene00007301	C04F12.7	777.245	530.794	685.835	331.678	607.003	398.24	681.049	349.366	545.151	-0.734999	0.129384	6.58949e-10	6.03017e-08		WBGene00006627	tsp-1	214.694	31.8969	16.7752	263.415	355.962	61.0216	328.519	41.4436	164.216	-2.88746	0.271146	1.05324e-27	1.47847e-25
WBGene00010851	M04C3.2	275.987	315.321	292.223	313.015	97.8327	85.1623	107.014	103.95	198.813	1.58174	0.125937	2.44556e-37	3.64147e-35		WBGene00010633	nspd-2	613.482	426.633	626.13	328.592	463.305	333.203	639.983	359.371	473.837	-0.660743	0.11637	7.03023e-10	6.39543e-08		WBGene00015947	C18A11.1	189.671	62.7029	74.3046	217.538	256.025	58.0961	247.468	71.1783	147.123	-1.74698	0.164383	1.31713e-27	1.81808e-25
WBGene00007071	AC3.5	3050.58	3014.09	3090.28	2974.69	4391.17	4685.71	4168.4	4283.09	3707.25	-0.525865	0.0417899	4.69679e-37	6.93674e-35		WBGene00020715	nspd-4	265.385	180.971	272.814	137.876	238.672	121.615	233.093	123.904	196.791	-0.80218	0.142437	8.35496e-10	7.55472e-08		WBGene00008565	acox-1.2	446.908	878.476	1028.7	368.902	352.743	895.909	327.663	738.11	629.676	1.2232	0.115448	1.96739e-27	2.69322e-25
WBGene00001397	fat-5	4840.34	4594.12	4516.95	6248.89	1428.17	1497.81	1210.95	1098.02	3179.41	1.92411	0.155089	1.40197e-36	2.03746e-34		WBGene00006038	ssp-9	523.891	332.85	479.254	241.747	394.997	274.215	462.648	305.911	376.939	-0.653314	0.116534	1.07475e-09	9.60656e-08		WBGene00009830	cutl-18	123.71	322.129	329.056	133.059	100.643	273.461	117.507	341.437	217.625	1.3945	0.132349	3.34492e-27	4.46817e-25
WBGene00013074	hmit-1.2	169.723	146.59	169.813	135.522	407.025	405.913	422.492	374.264	278.918	-1.34938	0.108772	1.79701e-36	2.59084e-34		WBGene00008629	cpt-5	943.442	601.298	969.068	573.481	801.145	464.879	768.751	632.368	719.304	-0.582685	0.103856	1.08148e-09	9.61077e-08		WBGene00021518	hpo-6	825.789	487.117	433.615	981.949	802.117	480.785	866.847	449.781	666	-0.894285	0.0846963	3.49089e-27	4.62584e-25
WBGene00007808	best-7	930.925	1009.43	915.677	1065.26	505.05	433.843	378.285	473.811	714.035	1.11266	0.09024	4.91761e-36	6.97917e-34		WBGene00003474	mtl-2	148.943	259.466	166.95	275.95	151.799	221.162	142.754	248.913	201.992	0.681001	0.121784	1.16022e-09	1.01348e-07		WBGene00007875	dod-24	730.896	332.107	280.647	620.398	714.123	309.137	568.067	312.549	483.49	-1.07725	0.10266	6.32218e-27	8.31116e-25
WBGene00001390	far-6	1550.7	1587.18	1544.37	1787.74	2515.3	2647.15	2693.14	2485.14	2101.34	-0.670456	0.0547022	1.72471e-35	2.39169e-33		WBGene00009959	F53B6.4	563.883	369.652	587.811	223.628	428.611	317.329	518.798	268.871	409.823	-0.787901	0.141401	1.21241e-09	1.05309e-07		WBGene00012462	Y17G7B.8	484.662	263.944	249.929	506.612	452.691	232.536	518.239	238.097	368.339	-0.977568	0.0932774	7.35603e-27	9.59412e-25
WBGene00007533	cbl-1	895.868	878.891	708.466	663.855	1711.46	1736.84	1694.95	1562.67	1231.62	-1.07794	0.0883498	2.27878e-35	3.13609e-33		WBGene00006416	sams-5	402.614	274.963	361.856	228.137	321.732	217.012	416.764	208.453	303.941	-0.663165	0.119415	1.43177e-09	1.23663e-07		WBGene00020456	fbxa-60	1081.68	483.875	566.381	1395.91	1132.14	604.671	1075.8	597.429	867.236	-1.03893	0.100061	2.02719e-26	2.62332e-24
WBGene00020674	T22B7.7	297.014	281.251	259.171	260.586	1326.47	1631.07	994.732	1758.39	851.085	-2.34828	0.193193	2.84174e-35	3.88144e-33		WBGene00021398	Y38C1AA.7	412.628	256.714	349.658	196.608	294.811	199.657	416.07	205.504	291.456	-0.741427	0.133757	1.48177e-09	1.27266e-07		WBGene00010545	cbp-2	573.051	274.456	269.892	698.542	778.919	317.98	770	340.343	502.898	-1.20885	0.116672	2.36952e-26	3.04254e-24
WBGene00011893	T21C9.6	855.153	798.505	799.536	758.528	1477.55	1443.45	1261.58	1450.91	1105.65	-0.802419	0.0657361	2.93752e-35	3.98231e-33		WBGene00011105	R07E3.4	663.636	1000.58	682.532	1009.57	493.256	845.662	484.045	851.701	753.873	0.63593	0.114893	1.62971e-09	1.37665e-07		WBGene00011737	sqst-1	2556.54	1292.51	1142.82	2712.03	2582.82	1626.64	2560.91	1130.34	1950.58	-0.985921	0.0954918	3.70354e-26	4.68285e-24
WBGene00010749	K10D11.5	912.47	1154.46	1118.76	1163.16	386.396	459.516	477.937	520.584	774.161	1.22338	0.100596	3.7702e-35	5.0733e-33		WBGene00013080	Y51A2D.13	1388.67	839.236	1028.02	727.946	1521.36	980.654	1349.35	842.954	1084.77	-0.604091	0.110106	2.17518e-09	1.81746e-07		WBGene00003730	nhx-2	2990.14	1897.68	1937.26	2853.02	2708.96	1734.62	3224.06	1943.13	2411.11	-0.638066	0.0618777	6.82705e-26	8.5025e-24
WBGene00017881	asp-13	4740.48	4403.15	4057.82	4323.79	9006.91	7940	8017.24	6857.99	6168.42	-0.850953	0.0700153	4.99931e-35	6.67776e-33		WBGene00021581	clec-70	55.9568	0	29.1101	6.18597	26.5143	2.81961	36.1779	8.19659	20.6201	-2.8791	0.524121	2.93124e-09	2.38438e-07		WBGene00022644	dod-19	9515.68	5248	3719.37	10846.1	9748.77	4236.71	10978.3	4346.55	7329.94	-1.20535	0.117607	7.06329e-26	8.73107e-24
WBGene00008565	acox-1.2	473.758	390.196	372.934	344.274	1110.68	1192.83	837.302	1077.07	724.881	-1.39854	0.115687	7.66687e-35	1.01662e-32		WBGene00003438	msp-45	672.668	518.151	693.664	409.43	553.534	389.341	688.003	406.786	541.447	-0.566975	0.104581	3.19014e-09	2.56071e-07		WBGene00008486	ugt-44	3967.41	2063.78	2300.85	4250.69	3478.27	2440.26	4490.35	2417.29	3176.11	-0.79742	0.0776255	7.65083e-26	9.38729e-24
WBGene00012139	T28F4.4	958.71	934.151	1198.37	985.284	1836.29	2013.44	2175.83	2165.01	1533.39	-0.992219	0.0819653	8.25969e-35	1.08729e-32		WBGene00020414	T10E9.4	461.195	276.236	405.231	221.548	302.561	197.427	482.871	224.84	321.489	-0.799723	0.148088	3.19798e-09	2.56071e-07		WBGene00002188	kgb-2	207.651	56.0838	59.9207	241.367	231.614	64.9299	294.3	89.3015	155.646	-1.81486	0.178506	1.5561e-25	1.89524e-23
WBGene00021487	comt-3	842.259	900.124	931.938	859.55	460.651	414.865	468.334	510.27	673.499	0.919277	0.0760758	1.21928e-34	1.58211e-32		WBGene00255375	F08B4.8	528.223	336.352	427.877	266.519	387.147	230.819	467.945	220.626	358.188	-0.740799	0.13752	3.51723e-09	2.78731e-07		WBGene00270321	Y41C4A.32	2633.27	339.845	141.669	2802.95	2682.4	194.723	5064.92	247.635	1763.43	-3.76179	0.372073	2.3002e-25	2.78106e-23
WBGene00001399	fat-7	13089.6	13476.2	13007.4	17572.8	4234.47	4493.68	3457.84	4661.62	9249.2	1.72948	0.144268	1.25755e-34	1.62019e-32		WBGene00022751	msrp-2	686.183	472.266	666.588	324.094	481.59	346.892	689.553	331.969	499.892	-0.731036	0.136169	3.59522e-09	2.83451e-07		WBGene00020340	T08B1.1	2876.4	1936.69	1799.21	2710.08	2895.49	1591.15	2804.36	1912.71	2315.76	-0.631587	0.0620252	2.48627e-25	2.98425e-23
WBGene00009393	clec-62	1542.68	1607.97	1514.3	1746.84	953.036	955.718	810.617	865.529	1249.59	0.827427	0.0685305	1.40672e-34	1.79962e-32		WBGene00013956	ZK265.3	352.895	210.44	303.007	161.909	263.201	162.73	310.019	201.321	245.69	-0.698959	0.130625	4.41607e-09	3.36102e-07		WBGene00000512	ckb-2	1790.78	860.628	956.852	1771.65	2263.17	1114.38	2353.75	852.348	1495.44	-1.09144	0.108195	4.08749e-25	4.87088e-23
WBGene00012144	T28H10.3	4220.77	5035.72	4981.2	4879.82	1184.91	1146.06	1667.28	1543.28	3082.38	1.76486	0.146968	2.09684e-34	2.66372e-32		WBGene00003424	msp-3	477.706	290.35	424.522	187.191	303.932	206.431	430.669	196.168	314.621	-0.84609	0.158631	4.50786e-09	3.41398e-07		WBGene00016260	rege-1	898.044	504.649	496.529	823.141	1018.17	512.938	1055.81	521.161	728.805	-0.882766	0.0874757	4.46147e-25	5.27856e-23
WBGene00019060	acox-3	558.773	594.688	508.418	521.354	1167.26	942.268	1138.17	1142.03	821.62	-0.996625	0.0832405	3.97178e-34	4.97595e-32		WBGene00017660	F21C10.11	36.7577	77.7913	36.5341	120.798	56.8921	109.999	38.0388	93.1495	71.2451	1.20743	0.228156	5.24679e-09	3.93484e-07		WBGene00044468	Y69A2AL.2	641.38	326.837	287.354	757.405	885.158	336.67	830.028	394.866	557.462	-1.18944	0.118355	5.82049e-25	6.78948e-23
WBGene00016174	C27H5.4	190.439	199.79	189.313	193.532	421.679	406.147	435.162	464.715	312.597	-1.14772	0.0962911	7.04192e-34	8.76188e-32		WBGene00007584	C14C10.1	230.703	139.104	226.435	84.5609	154.832	96.8884	231.421	92.9136	157.107	-0.973568	0.183748	5.32268e-09	3.97238e-07		WBGene00020760	T24C4.4	404.387	113.347	75.9607	410.378	491.036	171.225	413.56	115.687	274.448	-1.81386	0.182897	1.94402e-24	2.24945e-22
WBGene00007932	zip-5	374.724	444.407	439.795	433.315	177.667	160.188	150.616	187.06	295.971	1.30183	0.109375	8.86022e-34	1.09493e-31		WBGene00005655	srr-4	423.461	254.149	496.408	308.244	631.953	343.559	490.944	326.205	409.365	-0.680155	0.128165	5.64812e-09	4.15475e-07		WBGene00008656	lron-5	178.763	36.2825	44.2675	167.015	154.47	29.0879	202.079	56.3686	108.542	-2.04114	0.205885	1.95557e-24	2.24945e-22
WBGene00021518	hpo-6	874.743	1037.85	847.39	910.105	489.087	427.173	419.336	388.484	674.271	1.07581	0.090472	1.00844e-33	1.22948e-31		WBGene00015828	math-14	142.484	192.852	138.011	242.331	91.7974	264.333	98.0486	210.415	172.534	0.894163	0.169626	6.5488e-09	4.77162e-07		WBGene00019780	M60.4	1347.33	963.52	930.882	1356.79	1367.99	932.478	1304.63	911.121	1139.34	-0.517927	0.0517449	1.97594e-24	2.2572e-22
WBGene00018921	sago-2	2135.17	2189.17	1948.11	1874.46	1088.67	1275.21	1069.07	1158.98	1592.36	0.817898	0.0689117	1.69503e-33	2.0528e-31		WBGene00003448	msp-55	604.064	403.735	550.246	279.761	432.572	303.529	549.42	326.06	431.173	-0.662999	0.125687	6.68466e-09	4.84764e-07		WBGene00000190	arf-1.1	1064.04	171.622	64.8228	1054.69	1117.96	82.2879	1502.51	131.714	648.706	-3.32869	0.337882	3.12733e-24	3.52388e-22
WBGene00011364	T02B5.3	148.776	153.382	215.313	136.726	467.412	486.656	480.009	472.018	320.036	-1.50948	0.127427	1.79047e-33	2.15401e-31		WBGene00020350	T08B2.12	1059.73	659.581	923.039	529.046	690.445	467.174	976.549	591.907	737.183	-0.657938	0.126406	9.81443e-09	7.018e-07		WBGene00012634	Y38H6C.23	299.928	105.977	113.021	314.331	362.714	152.657	399.446	97.5742	230.706	-1.51904	0.156249	1.42352e-23	1.59319e-21
WBGene00006464	bath-47	167.506	156.292	190.125	155.918	38.4183	36.6065	24.3324	35.2254	100.553	2.27841	0.193407	4.02352e-33	4.74619e-31		WBGene00016357	C33F10.11	131.922	76.263	135.705	63.6794	101.878	55.4834	137.792	55.2877	94.7512	-0.961792	0.18559	1.0205e-08	7.23002e-07		WBGene00007689	C18E9.9	759.793	499.591	477.621	836.36	845.799	527.412	873.389	504.371	665.542	-0.709482	0.0727832	1.77865e-23	1.97729e-21
WBGene00021322	Y34B4A.6	5213.39	5117.04	5046.34	5514.29	3738.02	3798.65	3732.73	3446.73	4450.9	0.500417	0.0426062	1.43834e-32	1.67492e-30		WBGene00011214	R10E9.2	481.235	337.467	422.517	240.209	365.101	238.037	493.042	246.784	353.049	-0.689741	0.13297	1.05357e-08	7.4301e-07		WBGene00021590	Y46D2A.2	443.437	236.421	166.194	534.117	548.484	215.166	508.094	246.666	362.322	-1.21258	0.125045	1.95137e-23	2.15483e-21
WBGene00000820	csp-2	28.0358	42.9942	35.8013	39.8815	169.389	161.552	158.273	158.602	99.3161	-2.11321	0.181756	1.99113e-32	2.30388e-30		WBGene00003443	msp-50	831.593	636.368	814.61	451.571	664.304	443.959	775.469	465.932	635.476	-0.591324	0.114283	1.19001e-08	8.31597e-07		WBGene00016048	C24B9.3	2873.59	4207.99	4451.64	2803.57	2630.38	4306.08	2174.09	4299.25	3468.33	0.706715	0.0727268	2.4506e-23	2.68819e-21
WBGene00001156	ech-7	3460.44	3247.32	3022.63	3790.63	2062.06	1906.1	1769.13	1973.49	2653.97	0.798514	0.0686936	3.12337e-32	3.5685e-30		WBGene00020860	nspd-10	231.758	159.113	235.987	132.89	192.849	107.292	258.023	127.064	180.622	-0.759516	0.147584	1.27953e-08	8.90115e-07		WBGene00002021	hsp-17	1398.71	675.88	710.775	1505.92	1457.52	876.761	1902.11	793.475	1165.14	-1.0131	0.104978	3.25214e-23	3.54397e-21
WBGene00012966	exos-1	1147.37	1068.94	1131.55	1121.68	1703.29	1631.23	1646.11	1619.9	1383.76	-0.556905	0.0479328	5.45803e-32	6.19691e-30		WBGene00003995	pgp-1	576.57	381.49	733.239	385.075	482.572	325.208	525.731	368.447	472.291	-0.624009	0.122047	1.61378e-08	1.1076e-06		WBGene00007873	dod-21	74.7269	4.39825	4.20201	78.9156	81.575	5.81312	75.616	0	40.6559	-4.32534	0.44244	4.0497e-23	4.38427e-21
WBGene00001786	gst-38	178.506	147.062	156.777	169.845	33.1016	38.6642	33.2302	40.5614	99.7184	2.12753	0.184621	6.95853e-32	7.85146e-30		WBGene00017320	F09G8.5	100.952	53.85	111.12	68.0878	114.957	35.7351	116.539	43.7423	80.6228	-1.07047	0.210503	1.65469e-08	1.13063e-06		WBGene00014136	ZK896.5	446.322	259.516	227.186	436.194	456.846	219.001	517.446	206.988	346.187	-1.00406	0.10443	4.68613e-23	5.04033e-21
WBGene00016190	C28G1.5	602.894	582.788	562.934	581.473	321.93	311.982	308.076	290.879	445.369	0.906076	0.0787934	1.1733e-31	1.30762e-29		WBGene00017059	msrp-5	101.26	41.6554	105.325	40.1165	75.4124	38.647	120.561	54.4847	72.1827	-1.12256	0.220869	1.78385e-08	1.21349e-06		WBGene00015933	C17H12.8	3868.83	1725.18	1103.42	4088.46	3658.8	1538.69	4566.8	1569.75	2764.99	-1.41718	0.147915	5.41798e-23	5.7899e-21
WBGene00015695	ugt-26	854.551	828.614	846.403	784.452	1264.31	1306.5	1337.68	1250.36	1059.11	-0.628304	0.0548089	2.70693e-31	2.99843e-29		WBGene00009344	F32H2.7	169.851	90.1052	166.117	94.9004	129.345	79.9398	166.883	87.4749	123.077	-0.791877	0.156565	2.07269e-08	1.40377e-06		WBGene00006464	bath-47	157.992	43.978	14.7596	147.743	179.808	17.4536	148.376	30.8445	92.6194	-2.52373	0.263812	5.80875e-23	6.1677e-21
WBGene00000708	col-135	1002.67	1018.23	1127.74	1008.78	1966.91	1624.58	1790.71	1744.6	1410.53	-0.766469	0.0670908	3.4753e-31	3.82619e-29		WBGene00044674	B0280.17	168.418	70.0497	130.411	78.3475	126.134	56.4533	126.361	75.5794	103.969	-0.913072	0.180799	2.09682e-08	1.41388e-06		WBGene00016785	C49G7.7	132.295	11.7459	11.5855	106.917	186.443	29.1828	125.688	10.6721	76.8162	-3.04947	0.317761	6.1767e-23	6.51662e-21
WBGene00008394	D1086.7	661.076	739.291	701.097	853.648	1290.77	1372.98	1295.13	1335.13	1031.14	-0.832824	0.07316	4.55787e-31	4.98785e-29		WBGene00003571	ncx-6	236.574	369.062	239.572	359.088	212.165	369.517	238.31	296.242	290.066	0.54749	0.108062	2.23173e-08	1.49828e-06		WBGene00000373	cyp-14A5	519.54	246.292	265.449	635.955	528.114	228.799	460.412	259.484	393.006	-1.08106	0.113391	1.01287e-22	1.06184e-20
WBGene00000989	dhs-26	10.9874	7.7537	10.5614	13.2205	132.044	145.179	86.3306	172.71	72.3483	-3.61853	0.318185	4.70262e-31	5.11544e-29		WBGene00014697	cyp-25A3	469.72	359.512	492.007	400.31	624.452	313.132	529.663	327.188	439.498	-0.557178	0.110531	2.48628e-08	1.66192e-06		WBGene00022572	ZC239.14	86.0041	4.40046	4.18346	129.426	90.2559	5.80892	102.511	18.0584	55.0809	-3.57973	0.375554	1.27425e-22	1.32746e-20
WBGene00044535	K11D12.13	1650.17	1681.49	1551.39	1671	2320.77	2292.16	2313.33	2430.31	1988.83	-0.51034	0.0446312	5.20603e-31	5.62932e-29		WBGene00021878	Y54G2A.13	88.0023	46.8781	98.213	34.054	86.1835	38.548	77.6645	40.1098	63.7067	-1.05777	0.211174	2.54379e-08	1.69299e-06		WBGene00017302	F09F7.5	873.233	494.401	468.704	849.312	797.28	346.919	888.566	428.306	643.34	-0.953008	0.100277	1.38643e-22	1.4353e-20
WBGene00012583	clec-4	898.626	814.602	740.136	540.435	233.623	256.052	281.057	219.364	497.987	1.5774	0.139496	7.31399e-31	7.81564e-29		WBGene00019406	acdh-8	330.489	193.101	288.017	135.133	204.513	127.901	279.896	128.482	210.942	-0.861099	0.17214	2.5876e-08	1.71473e-06		WBGene00021339	Y34F4.4	233.284	84.6977	92.1839	296.466	300.617	125.897	312.742	98.8137	193.088	-1.4745	0.155804	1.83905e-22	1.89205e-20
WBGene00021079	W08A12.2	355.114	386.393	409.7	413.474	159.454	179.91	173.031	174.867	281.493	1.17209	0.103832	1.11118e-30	1.18045e-28		WBGene00013290	Y57G11A.2	257.532	194.587	307.614	175.44	234.224	140.083	314.166	149.51	221.644	-0.710665	0.142592	3.03023e-08	1.99318e-06		WBGene00019957	R08E3.1	7145.8	5300.05	4743.46	6739.59	6757.41	4997.38	7688.46	4760.95	6016.64	-0.507586	0.0531984	1.89703e-22	1.93965e-20
WBGene00022178	Y71H2AM.13	3543.21	3642.53	3917.75	3991.51	2404.69	2459.33	2527.78	2135.92	3077.84	0.656815	0.0580834	1.51272e-30	1.59768e-28		WBGene00006449	alg-4	221.03	165.94	237.017	123.043	193.181	112.969	243.183	109.709	175.759	-0.760253	0.152744	3.03372e-08	1.99318e-06		WBGene00008390	D1086.3	604.501	977.862	1038.28	533.269	594.251	940.38	513.863	878.72	760.141	0.755637	0.0796111	2.05693e-22	2.09024e-20
WBGene00015783	C15B12.1	48.3839	43.6336	53.6208	56.4553	200.682	166.74	221.317	190.301	122.642	-1.91884	0.170819	1.78027e-30	1.86938e-28		WBGene00010887	M7.12	351.584	222.978	359.97	232.977	381.73	254.984	392.344	291.385	310.994	-0.52522	0.105978	4.05807e-08	2.62137e-06		WBGene00009710	F44G3.10	60.9219	7.70563	1.0373	83.5764	88.3061	3.8683	97.5961	8.48812	43.9375	-3.89953	0.41178	3.40141e-22	3.41461e-20
WBGene00010808	sepa-1	883.841	854.278	627.25	749.591	1724.21	1678.53	1901.23	1510.28	1241.15	-1.11451	0.0993068	2.12865e-30	2.22236e-28		WBGene00017542	F17E9.5	495.036	274.098	431.415	181.166	273.755	207.2	456.819	223.676	317.895	-0.843477	0.171646	4.11861e-08	2.64935e-06		WBGene00021118	clec-125	86.2661	16.492	8.43255	86.2604	95.2911	18.4226	107.309	14.89	54.1705	-2.62385	0.279502	4.77091e-22	4.76056e-20
WBGene00017302	F09F7.5	931.586	904.053	848.278	939.551	522.228	565.667	495.205	490.272	712.105	0.794197	0.0708741	3.82803e-30	3.92882e-28		WBGene00018343	F42A10.7	862.628	543.326	692.174	475.799	599.365	333.314	797.051	436.646	592.538	-0.674675	0.138526	5.42884e-08	3.47762e-06		WBGene00016877	C52D10.3	267.096	479.049	482.574	275.839	221.915	484.53	207.177	508.608	365.849	0.986274	0.105418	5.98066e-22	5.93196e-20
WBGene00020938	clec-218	156.114	174.514	241.292	179.002	470.175	534.599	537.829	488.991	347.815	-1.40439	0.125978	5.37639e-30	5.39701e-28		WBGene00009581	F40F9.3	122.394	84.0649	123.947	54.638	113.961	46.103	148.449	62.8321	94.5486	-0.974923	0.201678	6.00167e-08	3.82862e-06		WBGene00016716	acs-17	1372.43	829.83	785.381	1283.38	1652.72	898.889	1551.23	838.618	1151.56	-0.789886	0.0843296	6.31328e-22	6.22459e-20
WBGene00022139	tub-2	2028.14	2006.89	2021.3	2051.43	1459.68	1303.26	1255.48	1248.84	1671.88	0.614749	0.0548502	5.3774e-30	5.39701e-28		WBGene00001817	haf-7	487.157	662.842	573.303	699.848	468.309	984.186	476.418	726.75	634.852	0.574632	0.119249	7.68282e-08	4.8408e-06		WBGene00021253	Y22D7AL.15	642.969	414.957	433.374	727.218	712.678	374.307	795.478	392.662	561.705	-0.816592	0.0875973	9.05799e-22	8.8779e-20
WBGene00002188	kgb-2	219.828	254.953	244.539	308.799	78.836	83.8931	71.9359	81.9429	168.091	1.66931	0.150491	8.664e-30	8.50758e-28		WBGene00021996	Y59E9AL.6	328.235	173.645	255.269	131.891	211.47	162.833	320.938	169.285	219.196	-0.752191	0.157219	8.27253e-08	5.14906e-06		WBGene00004003	pgp-9	1526.75	924.536	838.309	1292.92	1338.38	838.014	1303.5	856.4	1114.85	-0.647252	0.0696867	1.59624e-21	1.5553e-19
WBGene00019997	R10F2.6	287.95	247.692	277.886	257.663	518.165	539.646	503.104	542.346	396.806	-0.959435	0.0863166	9.11816e-30	8.9054e-28		WBGene00003442	msp-49	760.048	586.616	704.993	371.338	590	395.887	805.602	416.887	578.921	-0.645454	0.134851	8.32337e-08	5.15982e-06		WBGene00019660	K11H12.4	706.107	332.096	292.343	716.75	729.35	242.292	535.714	210.508	470.645	-1.29317	0.140622	2.21601e-21	2.14655e-19
WBGene00000522	clc-1	1025.81	1156.63	1148.45	1089.71	465.582	580.864	612.087	604.522	835.456	0.954584	0.0859571	9.91208e-30	9.62903e-28		WBGene00017955	F31E8.5	102.763	45.6657	83.0767	41.2678	72.9478	37.6143	88.2804	37.3656	63.6227	-1.02782	0.215702	8.76366e-08	5.41094e-06		WBGene00017364	clec-7	327.189	164.939	174.694	334.965	346.085	172.537	335.106	177.571	254.136	-0.942434	0.102327	2.45531e-21	2.35085e-19
WBGene00014000	ZK550.6	764.026	749.806	764.454	743.22	1195.72	1123.39	1287.49	1280.58	988.585	-0.684757	0.0616078	1.30955e-29	1.2587e-27		WBGene00016003	C18H9.5	245.801	137.05	237.395	145.484	318.274	187.117	247.155	160.416	209.836	-0.674915	0.141698	9.44699e-08	5.80952e-06		WBGene00016004	C18H9.6	563.822	264.013	265.813	595.707	814.36	314.685	664.161	319.769	475.291	-1.15577	0.125986	2.97519e-21	2.83224e-19
WBGene00010850	M04C3.1	1720.17	1824.82	1867.37	1993.98	1098.14	1224.57	1204.9	1094.17	1503.52	0.67304	0.0607393	1.89538e-29	1.8027e-27		WBGene00044469	clec-173	298.234	237.902	320.505	191.401	314.829	198.77	288.655	205.459	256.969	-0.514032	0.10792	1.04267e-07	6.36111e-06		WBGene00018907	F55G1.15	389.738	178.115	176.008	355.137	329.696	150.286	381.343	190.376	268.837	-1.04312	0.114565	5.59651e-21	5.29718e-19
WBGene00006604	tra-1	1620.97	1642.29	1695.66	1839.31	1130.52	1116.88	1150.84	1099.77	1412.03	0.587268	0.0529624	2.12278e-29	2.00846e-27		WBGene00016058	nspd-3	520.796	372.939	481.495	215.964	360.564	217.038	537.754	247.834	369.298	-0.789444	0.170915	1.7543e-07	1.03733e-05		WBGene00009221	acs-2	1278.39	494.76	521.753	1091.1	1583.08	723.328	1494.37	624.314	976.388	-1.17652	0.130069	9.29895e-21	8.75158e-19
WBGene00017635	F20D6.5	71.4854	69.8185	93.4306	91.2812	266.631	231.297	242.335	250.205	164.56	-1.57695	0.143532	3.09695e-29	2.91499e-27		WBGene00011795	T16A9.5	251.673	171.194	252.178	143.947	187.901	111.973	258.59	124.196	187.706	-0.7329	0.158623	1.79282e-07	1.05202e-05		WBGene00004796	sid-2	648.549	415.722	321.226	671.819	604.459	333.279	675.588	358.188	503.604	-0.846194	0.0934282	1.01697e-20	9.51701e-19
WBGene00008341	ttr-44	258.773	255.03	279.426	323.445	554.89	578.242	683.9	618.51	444.027	-1.1106	0.101209	3.54916e-29	3.3234e-27		WBGene00003458	msp-65	540.86	418.816	549.148	298.276	434.756	335.572	567.172	349.676	436.784	-0.537058	0.115697	1.83809e-07	1.07448e-05		WBGene00020952	kel-8	2143.31	1351.05	1196.96	2165.65	1873.87	1290.97	2462.15	1364.53	1731.06	-0.715887	0.0791569	1.29622e-20	1.19728e-18
WBGene00020393	T10B5.7	844.038	802.055	858.686	815.46	1291.31	1281.34	1226.64	1236.55	1044.51	-0.592602	0.0537256	4.10958e-29	3.82844e-27		WBGene00016399	C34D4.3	206.13	133.104	194.528	73.029	148.556	73.5216	191.558	97.187	139.702	-0.906398	0.196956	1.84759e-07	1.07594e-05		WBGene00008498	F01D5.8	253.191	129.872	119.966	290.304	263.133	101.637	290.772	131.748	197.578	-1.15885	0.129866	2.81009e-20	2.52969e-18
WBGene00044534	H23N18.6	127.476	121.567	103.148	78.5777	12.0048	7.50367	5.5436	7.06235	57.8604	3.67285	0.333358	4.20368e-29	3.89613e-27		WBGene00016742	C48B6.4	85.2522	37.5025	84.1825	44.3733	82.8687	26.3255	76.782	42.8446	60.0164	-1.0359	0.22485	1.86236e-07	1.08045e-05		WBGene00010658	K08D8.4	576.031	291.439	257.795	562.682	783.538	329.642	803.049	287.159	486.417	-1.19588	0.134185	3.09241e-20	2.76879e-18
WBGene00019605	ctsa-1	1294.34	1309.42	1307.2	1420.6	810.445	855.287	901.275	798.981	1087.19	0.656148	0.0597666	5.99478e-29	5.52798e-27		WBGene00003452	msp-59	1385.63	983.309	1341.23	645.919	1139.11	684.355	1343.42	695.715	1027.33	-0.7308	0.159359	2.10029e-07	1.20037e-05		WBGene00018921	sago-2	2013.37	1230.5	1136.15	2068.89	1841.92	935.009	1783.32	1212.58	1527.72	-0.756258	0.0851704	5.75592e-20	5.07133e-18
WBGene00008435	glna-2	583.427	537.656	601.391	499.776	930.241	937.318	991.444	961.106	755.295	-0.766954	0.070412	1.38425e-28	1.26363e-26		WBGene00017058	msrp-6	110.732	74.9675	118.368	55.551	102.045	49.0113	143.556	62.693	89.6155	-0.90218	0.197664	2.27831e-07	1.2925e-05		WBGene00012747	Y40H7A.10	1551.78	2303.95	2506.56	1689.6	1796.57	2325.54	1708.74	2515.05	2049.72	0.505832	0.0567548	7.3755e-20	6.4639e-18
WBGene00006539	tbb-6	403.673	436.398	432.22	532.023	141.088	158.151	198.067	182.362	310.498	1.3869	0.127961	1.40225e-28	1.27366e-26		WBGene00007308	C04G2.9	1709.56	1044.97	1493.96	744.758	1186.23	812.568	1735.95	852.876	1197.61	-0.76179	0.166991	2.35448e-07	1.3308e-05		WBGene00004859	sma-5	610.179	350.586	327.603	572.541	573.649	329.536	728.044	340.878	479.127	-0.858746	0.0972884	7.98323e-20	6.92856e-18
WBGene00016064	acd-1	236.855	260.117	190.123	104.369	21.0443	19.3774	27.6527	13.2104	109.094	3.24372	0.301239	2.58749e-28	2.31548e-26		WBGene00010869	M05B5.1	105.578	51.4908	103.555	47.4507	77.3849	49.8444	103.307	49.2052	73.4771	-0.903212	0.198661	2.54787e-07	1.4244e-05		WBGene00001390	far-6	1465.49	1062.36	1014.58	1503.31	1463.43	1040.63	1704.6	1023.63	1284.75	-0.554578	0.0624452	7.98934e-20	6.92856e-18
WBGene00003040	lin-59	2967.95	2737.87	2979.6	2466.82	1693.71	1690.32	1777.82	1822.33	2267.05	0.667239	0.0616216	3.35621e-28	2.98867e-26		WBGene00021381	Y37E11B.10	188.304	95.0917	144.803	72.387	116.296	84.4305	181.89	83.2173	120.802	-0.846957	0.18724	2.80937e-07	1.5585e-05		WBGene00013481	Y69H2.3	5469.8	4127.99	3515.17	5040.21	5165.54	3484.48	5481.47	3612.13	4487.1	-0.511548	0.0575389	8.39229e-20	7.2401e-18
WBGene00001428	fkb-3	476.471	435.167	425.523	442.989	791.202	800.847	713.995	820.806	613.375	-0.804359	0.0746777	4.62765e-28	4.08087e-26		WBGene00013771	Y113G7C.1	219.611	112.704	176.03	101.177	153.487	105.266	164.062	100.324	141.583	-0.708792	0.156433	2.81816e-07	1.5585e-05		WBGene00006929	vit-5	102701	135949	137062	96749.4	96775.1	139506	80256.3	138120	115890	0.536324	0.0609413	1.42404e-19	1.22216e-17
WBGene00194986	T27F7.4	474.244	482.073	499.66	471.853	794.062	759.666	807.687	813.961	637.901	-0.708458	0.0659183	7.35573e-28	6.45527e-26		WBGene00020550	T17H7.1	200.048	361.894	218.105	311.668	225.668	347.472	227.591	274.934	270.923	0.526316	0.116013	3.07288e-07	1.69328e-05		WBGene00007404	best-5	186.958	43.9841	44.1955	218.416	179.204	66.881	144.123	57.4172	117.647	-1.73272	0.198504	1.57399e-19	1.34389e-17
WBGene00011258	best-15	92.5077	89.2778	87.7479	81.5949	248.941	216.352	243.363	246.612	163.299	-1.42041	0.133038	9.20515e-28	7.96289e-26		WBGene00018384	F43C11.7	236.506	164.627	261.906	154.636	230.134	129.841	199.699	138.413	189.47	-0.609178	0.134916	3.11944e-07	1.71279e-05		WBGene00010041	F54C9.3	1521.65	1047.07	990.461	1786.68	2110.96	1078.46	2046.8	1097.72	1459.98	-0.807016	0.092488	2.13818e-19	1.79781e-17
WBGene00012747	Y40H7A.10	1642.2	1784.08	1896.15	1792.29	2568.99	2571.02	2845.76	2755.57	2232.01	-0.58525	0.0544633	9.55955e-28	8.23027e-26		WBGene00020840	spch-3	459.28	301.764	413.563	215.34	300.072	224.965	470.394	252.089	329.683	-0.670767	0.149516	3.47399e-07	1.88725e-05		WBGene00206354	F27E5.9	127.105	46.2305	30.1081	114.785	139.355	35.7865	138.131	38.1935	83.712	-1.74769	0.20163	2.63223e-19	2.20203e-17
WBGene00021020	W04B5.3	849.341	846.307	896.85	931.788	491.665	483.321	544.366	546.82	698.807	0.758498	0.0709369	1.22137e-27	1.04658e-25		WBGene00010473	hrg-2	31.294	88.7209	43.1096	85.5615	60.8563	218.29	32.6957	105.626	83.2693	1.44812	0.325787	3.64607e-07	1.97375e-05		WBGene00020325	bath-46	69.502	8.79888	5.24451	54.1507	66.2475	4.8434	70.034	2.12546	35.1183	-3.5434	0.406294	3.36779e-19	2.80322e-17
WBGene00007660	pals-6	106.676	124.12	96.6803	88.8804	2.74882	15.0611	6.63936	4.40503	55.6514	3.83402	0.360906	1.91185e-27	1.63055e-25		WBGene00009110	F25D1.5	125.119	92.2633	168.154	85.5715	140.501	77.1479	145.785	81.0508	114.449	-0.722879	0.16257	4.09119e-07	2.19923e-05		WBGene00003941	pbo-1	912.49	633.717	662.419	937.226	987.904	594.334	1068.96	617.078	801.766	-0.625562	0.0720568	4.1236e-19	3.41516e-17
WBGene00004810	skr-4	747.364	855.244	859.401	893.883	432.032	506.498	412.299	413.742	640.058	0.914709	0.0867798	4.84048e-27	4.08987e-25		WBGene00044644	B0205.13	308.571	96.0021	217.123	105.946	291.661	198.911	259.633	143.497	202.668	-0.896602	0.202644	4.33148e-07	2.30423e-05		WBGene00015216	valv-1	317.067	145.297	169.12	459.173	385.727	158.615	348.469	180.361	270.479	-1.18139	0.137221	4.68429e-19	3.86023e-17
WBGene00011753	T13F3.6	3624.4	3232.2	3829.31	3906.36	5261.73	5528.84	5421.85	5531	4541.96	-0.568234	0.0536462	5.10088e-27	4.28993e-25		WBGene00012595	Y38E10A.17	264.92	188.687	248.232	131.057	215.458	164.534	261.234	137.65	201.471	-0.621609	0.140121	4.50727e-07	2.38126e-05		WBGene00016335	gba-1	929.244	603.307	540.561	1014.12	868.059	543.156	1103.36	605.743	775.943	-0.752856	0.0872097	4.99777e-19	4.09817e-17
WBGene00001770	gst-22	532.937	555.137	542.622	451.94	253.929	267.352	269.218	238.108	388.905	1.00719	0.0961023	8.70894e-27	7.29063e-25		WBGene00013710	Y106G6G.1	66.1426	33.9167	69.0215	33.0039	61.9214	30.0983	74.1837	27.3315	49.4524	-1.03719	0.235356	4.77423e-07	2.49656e-05		WBGene00001786	gst-38	168.97	56.1004	53.3999	139.515	148.801	29.0504	162.208	39.31	99.6694	-1.75815	0.207502	1.28635e-18	1.04447e-16
WBGene00012910	Y46G5A.20	268.967	364.617	321.634	264.833	109.008	81.4532	102.019	109.475	202.751	1.57425	0.150738	1.10992e-26	9.24899e-25		WBGene00008529	F02E9.3	101.207	53.719	81.919	40.2075	79.656	49.8646	116.63	40.0692	70.4091	-0.965939	0.220118	5.14833e-07	2.68307e-05		WBGene00219410	C04C3.14	80.0695	14.0971	13.4954	72.0497	78.2328	12.6041	76.8574	17.0157	45.5527	-2.36432	0.278268	1.41981e-18	1.14721e-16
WBGene00016862	C52A10.1	1466.59	1568.98	1714.32	1731.75	948.339	1016.02	1054.26	1007.63	1313.48	0.678498	0.0646819	1.18417e-26	9.82267e-25		WBGene00018531	F47B3.7	120.313	72.5289	146.683	49.509	97.2966	46.0858	93.6056	54.6668	85.0861	-0.953987	0.22062	6.58237e-07	3.36204e-05		WBGene00006539	tbb-6	381.157	190.234	236.715	412.974	409.209	200.635	506.835	202.017	317.472	-1.01532	0.119884	1.64524e-18	1.3229e-16
WBGene00006897	ver-4	17.672	23.3372	13.8274	15.5946	173.322	160.668	96.0304	119.531	77.4978	-2.91594	0.280017	1.39841e-26	1.15471e-24		WBGene00009457	F36A2.10	157.307	87.1055	112.964	47.3477	111.942	56.5097	157.587	73.6492	100.551	-0.946722	0.219118	6.82194e-07	3.4614e-05		WBGene00010977	R02D5.3	256.182	141.886	102.75	317.566	352.107	123.012	338.853	149.835	222.774	-1.25854	0.150204	3.24832e-18	2.57441e-16
WBGene00045411	C25F9.11	85.0068	151.511	134.824	120.857	0.923207	1.07208	5.54296	0.882808	62.5775	5.85199	0.552307	1.97658e-26	1.61741e-24		WBGene00014057	ZK673.1	714.732	411.268	623.744	466.826	525.481	381.248	520.128	366.798	501.278	-0.506994	0.117069	7.92622e-07	3.99533e-05		WBGene00013074	hmit-1.2	160.076	292.452	359.531	138.566	160.591	356.836	128.96	286.113	235.391	1.10685	0.131901	3.32799e-18	2.62499e-16
WBGene00010759	cysl-2	1432.12	1343.15	1348.18	1438.02	2140.18	1973.92	1989.84	2258.4	1740.48	-0.583079	0.0559569	3.03148e-26	2.4695e-24		WBGene00013854	cyc-2.2	270.235	192.121	256.869	140.92	223.963	117.832	229.641	151.673	197.907	-0.647336	0.150581	8.106e-07	4.0726e-05		WBGene00019617	K10C2.1	14117.2	10141.8	8395.74	12126	13841.8	7820.67	13875.3	8077.72	11049.5	-0.632949	0.0751309	3.62289e-18	2.83064e-16
WBGene00011517	cgt-1	202.507	183.345	211.24	168.064	36.6282	59.186	60.8499	51.0905	121.614	1.86086	0.180598	3.95764e-26	3.18117e-24		WBGene00017467	F14F9.4	204.213	110.273	175.983	81.5446	164.574	126.902	162.337	88.4489	139.284	-0.727827	0.169484	8.14671e-07	4.07624e-05		WBGene00004810	skr-4	708.349	491.81	457.464	812.404	816.727	486.858	854.788	527.836	644.529	-0.684829	0.0814098	3.8572e-18	2.99956e-16
WBGene00022572	ZC239.14	90.8059	136.348	95.0398	107.276	7.36188	6.44159	17.7275	13.229	59.2787	3.21192	0.312538	7.10112e-26	5.68277e-24		WBGene00016351	C33F10.1	402.428	306.68	345.361	194.553	330.27	215.665	392.161	226.422	301.692	-0.590557	0.137448	8.55411e-07	4.24229e-05		WBGene00017467	F14F9.4	206.907	97.8454	97.0657	224.821	300.337	99.8885	240.613	79.7799	168.407	-1.3437	0.161092	4.57627e-18	3.54212e-16
WBGene00018259	F41B4.3	362.511	379.647	423.3	462.741	133.305	162.769	194.014	151.163	283.681	1.3258	0.129653	9.54875e-26	7.60801e-24		WBGene00010574	K04H4.5	204.407	109.695	158.407	74.2149	123.942	99.743	196.197	69.1962	129.475	-0.875941	0.205349	8.75762e-07	4.32925e-05		WBGene00010086	F55B11.4	944.021	688.975	635.299	1038.39	955.421	608.38	1003.81	689.849	820.518	-0.575629	0.0686143	5.75953e-18	4.41671e-16
WBGene00017678	asp-12	2772.62	3200.49	2553.47	2705.14	1205.08	812.718	1036.74	1127.84	1926.76	1.39948	0.137362	1.43146e-25	1.13061e-23		WBGene00016577	clec-3	45.8942	24.5801	46.3873	18.5687	53.0601	10.3447	42.3797	10.9351	31.5187	-1.42511	0.335117	8.85842e-07	4.3511e-05		WBGene00020455	fbxa-59	397.334	204.571	222.411	383.642	358.934	207.305	373.046	216.804	295.506	-0.808256	0.097198	7.42758e-18	5.6696e-16
WBGene00017658	F21C10.9	451.603	382.018	379.918	433.234	703.389	722.24	781.933	723.919	572.282	-0.823173	0.0806275	1.73628e-25	1.36542e-23		WBGene00010486	K01H12.4	149.758	109.924	169.311	68.0684	122.742	70.5444	163.387	82.9028	117.08	-0.799372	0.187623	9.07818e-07	4.44484e-05		WBGene00044646	B0205.14	77.5304	26.1423	13.428	95.0241	109.258	20.345	90.1799	15.8833	55.9739	-2.23855	0.270338	7.89329e-18	5.99745e-16
WBGene00004796	sid-2	686.076	709.113	637.722	708.352	370.742	391.302	426.212	363.993	536.689	0.808683	0.0795711	2.72668e-25	2.12588e-23		WBGene00013180	cutl-10	25.7103	52.6527	21.5727	63.9526	22.1112	58.3104	24.7244	49.203	39.7797	1.1342	0.266338	9.52554e-07	4.60521e-05		WBGene00023483	Y75B8A.39	66.2716	11.0029	2.08807	53.2438	96.5104	9.6787	90.0107	6.37174	41.8973	-3.29884	0.399582	1.22103e-17	9.2352e-16
WBGene00003995	pgp-1	1349.62	1420.29	1114.8	1294.08	575.619	731.449	483.172	524.711	936.718	1.14168	0.112839	3.24903e-25	2.50092e-23		WBGene00013079	ttr-26	238.45	158.169	295.301	136.106	281.001	210.473	290.106	185.831	224.43	-0.613778	0.143815	9.76715e-07	4.70722e-05		WBGene00018562	F47D12.6	138.999	47.3115	51.6471	155.426	139.03	57.0469	160.944	59.4114	101.227	-1.42045	0.172987	1.35894e-17	1.02316e-15
WBGene00016667	C45E5.4	324.909	329.737	302.989	347.156	147.246	151.373	147.362	117.299	233.509	1.19265	0.118351	4.6816e-25	3.57336e-23		WBGene00006366	sym-1	137.417	207.562	147.892	358.141	187.794	355.352	134.121	219.731	218.501	0.832388	0.196334	9.95836e-07	4.75495e-05		WBGene00007807	C29F3.7	573.257	237.415	312.256	679.117	461.907	239.779	561.073	267.549	416.544	-1.07634	0.13135	1.61293e-17	1.20345e-15
WBGene00006628	tsp-2	173.845	224.277	283.49	296.636	20.2551	26.8339	54.2983	49.3943	141.129	2.6508	0.263769	4.98581e-25	3.78964e-23		WBGene00011176	R09E10.6	1027.9	654.42	883.005	458.862	742.165	477.884	1079.48	454.511	722.277	-0.791405	0.186747	9.96436e-07	4.75495e-05		WBGene00013216	Y54G11A.7	768.683	1304.1	1256.74	668.091	652.127	1071.12	821.027	1271.74	976.704	0.736965	0.0899489	2.17465e-17	1.61529e-15
WBGene00021253	Y22D7AL.15	676.781	763.759	748.146	829.897	397.47	361.073	385.867	450.397	576.674	0.901599	0.0897137	8.47215e-25	6.41271e-23		WBGene00015907	C17F3.1	224.463	125.649	188.396	93.6518	150.657	114.026	197.628	119.948	151.802	-0.685229	0.161074	9.98991e-07	4.75495e-05		WBGene00000981	dhs-18	500.629	297.706	321.335	525.747	501.06	245.94	502.269	301.037	399.465	-0.781562	0.0955666	2.38101e-17	1.76067e-15
WBGene00009710	F44G3.10	64.0637	87.6911	92.6112	101.72	1.85154	5.35469	8.86941	4.41913	45.8226	4.04223	0.401192	8.96953e-25	6.73551e-23		WBGene00016358	C33F10.12	125.786	70.2095	121.889	66.0171	88.4423	61.1309	125.384	49.2042	88.5079	-0.831628	0.197719	1.16173e-06	5.47867e-05		WBGene00045507	F10A3.17	682.592	437.742	410.151	627.78	633.18	438.818	671.58	407.031	538.609	-0.60964	0.074952	4.55876e-17	3.35606e-15
WBGene00004986	spp-1	607.808	674.22	600.672	511.305	1016.76	1032.76	1035.21	1116.26	824.372	-0.795455	0.0790962	8.97276e-25	6.73551e-23		WBGene00015094	B0261.6	187.728	120.859	151.726	65.8865	130.758	79.1051	192.068	81.8469	126.247	-0.854309	0.203434	1.16656e-06	5.48461e-05		WBGene00009796	F46G10.1	1431.66	919.159	1002.65	1550.13	1333.29	904.014	1305.72	952.202	1174.85	-0.560313	0.0688777	5.04747e-17	3.69939e-15
WBGene00018174	F38B6.4	1099.6	899.308	890.525	1011.7	1721.27	1705.97	1580.2	1530.29	1304.86	-0.735373	0.0736724	1.90504e-24	1.42416e-22		WBGene00012809	Y43F8A.2	124.733	94.8816	138.121	71.1944	119.352	60.1782	170.359	75.6511	106.809	-0.800559	0.19224	1.38677e-06	6.46065e-05		WBGene00017361	F10E9.12	297.19	126.533	120.067	362.609	453.207	192.607	433.885	125.311	263.926	-1.41039	0.177221	1.02404e-16	7.34292e-15
WBGene00000397	cdh-5	398.305	401.593	293.213	310.833	147.256	120.227	119.695	129.519	240.08	1.4108	0.142306	2.43227e-24	1.81084e-22		WBGene00021113	gsp-3	285.837	208.081	273.883	137.155	209.02	154.267	279.114	146.66	211.752	-0.639682	0.154814	1.69177e-06	7.62734e-05		WBGene00019914	clec-150	3295.13	2333.56	2002.16	3357.13	3062.11	1935.21	3364.14	2419.56	2721.13	-0.575722	0.0716415	1.09427e-16	7.81268e-15
WBGene00010977	R02D5.3	270.831	334.979	371.244	355.057	123.084	139.688	126.237	143.691	233.101	1.29944	0.131118	2.66232e-24	1.97403e-22		WBGene00012115	T28B8.4	141.801	79.8484	126.363	62.9809	107.101	84.5856	142.883	67.4949	101.632	-0.741963	0.179821	1.70808e-06	7.67838e-05		WBGene00008566	acox-1.3	552.897	825.708	979.062	524.907	594.082	835.778	580.04	876.359	721.104	0.626787	0.0781873	1.17296e-16	8.33856e-15
WBGene00013119	Y51H4A.25	212.544	342.86	248.265	330.904	79.3764	65.7636	49.0984	87.4804	177.036	1.97791	0.200758	3.2787e-24	2.42117e-22		WBGene00003434	msp-38	369.862	267.297	325.604	188.252	267.225	153.632	362.518	187.991	265.298	-0.671304	0.16288	1.72809e-06	7.74566e-05		WBGene00022887	ZK1290.5	390.793	725.437	713.389	410.545	383.697	864.128	511.165	749.016	593.521	0.82957	0.104051	1.19137e-16	8.43329e-15
WBGene00019744	M02H5.8	1449.31	1740.07	1771.63	1494.67	671.384	695.883	807.166	951.065	1197.65	1.02798	0.103962	3.74677e-24	2.75562e-22		WBGene00003444	msp-51	1503.74	1034.12	1471.46	743.661	1096.88	753.181	1468.34	812.824	1110.52	-0.660938	0.161125	1.8895e-06	8.3957e-05		WBGene00016218	pals-23	183.088	58.7821	42.6639	144.716	174.226	37.6955	119.53	50.4416	101.393	-1.67407	0.211373	1.27149e-16	8.9621e-15
WBGene00008451	E01G6.3	41.8663	42.7076	29.2497	38.3864	155.534	193.78	126.094	166.448	99.2583	-2.04673	0.208025	4.22204e-24	3.09264e-22		WBGene00010900	M28.9	205.153	145.449	225.637	105.282	143.594	94.0036	208.223	94.8287	152.771	-0.761425	0.186311	1.92024e-06	8.50772e-05		WBGene00007599	C15A11.7	605.654	400.42	410.994	598.872	625.446	388.58	654.001	419.629	512.95	-0.601773	0.0752438	1.41527e-16	9.89137e-15
WBGene00002272	lec-9	3774.2	3920.88	3721.8	3721.4	2793.1	2756.04	2353.36	2557.78	3199.82	0.525473	0.0528858	5.31403e-24	3.83074e-22		WBGene00003426	msp-19	1640.27	1086.27	1546.49	696.318	1212.31	781.446	1564.07	723.87	1156.38	-0.776764	0.1917	2.21263e-06	9.63655e-05		WBGene00008988	F20G2.5	50.9004	8.79662	5.26301	73.4165	68.4408	13.5709	83.4698	10.6333	39.3114	-2.75547	0.350166	2.74082e-16	1.87599e-14
WBGene00019777	M57.1	391.129	375.638	354.247	357.467	602.91	651.324	658.116	611.189	500.252	-0.758037	0.0768335	6.02713e-24	4.32762e-22		WBGene00007733	smz-1	345.892	282.649	363.265	213.417	284.313	207.92	415.256	214.015	290.841	-0.564913	0.139464	2.51671e-06	0.000108685		WBGene00014132	ZK896.1	99.7138	21.9919	27.3611	85.3473	96.1359	29.0791	110.942	29.7722	62.543	-1.79507	0.229471	3.17696e-16	2.16556e-14
WBGene00013292	Y57G11A.4	137.136	120.169	129.41	159.956	285.074	339.566	314.285	341.374	228.371	-1.21165	0.1245	1.4142e-23	1.00747e-21		WBGene00009964	fip-6	67.9014	15.0045	45.1659	31.8952	66.5696	27.3439	60.2903	23.5988	42.2212	-1.15896	0.289054	2.66959e-06	0.000114643		WBGene00019547	K09C4.1	130.659	230.366	296.364	118.478	106.301	252.591	88.9651	240.601	183.04	1.16804	0.14933	3.29966e-16	2.23998e-14
WBGene00020774	T24E12.5	109.087	121.337	129.999	119.946	29.2738	26.9153	27.6512	14.0905	72.2876	2.26281	0.233831	2.32165e-23	1.62838e-21		WBGene00013999	ZK550.5	227.926	162.496	193.014	127.875	182.475	117.581	244.664	125.71	172.718	-0.61247	0.152565	2.85512e-06	0.00012193		WBGene00010822	M01G12.9	621.451	369.429	307.686	622.183	750.154	428.541	734.32	366.913	525.085	-0.864023	0.110321	3.67481e-16	2.48447e-14
WBGene00010086	F55B11.4	993.84	1090.76	1003.15	1047.43	637.583	716.89	606.611	635.742	841.5	0.660791	0.0677991	2.49273e-23	1.73498e-21		WBGene00010254	F58E6.5	173.779	106.337	167.11	97.9578	119.457	76.1989	177.56	91.9936	126.299	-0.70702	0.177511	3.07899e-06	0.000130403		WBGene00018353	fbxa-182	538.407	250.676	267.763	614.833	693.128	378.157	676.873	320.141	467.497	-1.02069	0.130586	3.7309e-16	2.51214e-14
WBGene00019368	K03H6.2	43.3191	40.0853	43.7688	62.1837	159.74	157.231	147.079	180.704	104.264	-1.76511	0.183251	2.99025e-23	2.07332e-21		WBGene00014158	ZK938.1	409.873	273.572	368.784	193.879	258.778	203.178	352.415	198.588	282.383	-0.615446	0.155283	3.5099e-06	0.000146634		WBGene00012583	clec-4	848.51	258.411	331.395	770.886	700.737	362.499	514.854	263.685	506.372	-1.18474	0.152165	4.29015e-16	2.86541e-14
WBGene00000684	col-110	7.68411	6.78116	6.49908	15.6342	100.944	78.4756	77.493	81.9643	46.9344	-3.19501	0.330629	3.0198e-23	2.08584e-21		WBGene00006052	ssq-3	316.07	180.079	221.071	102.101	182.458	140.15	277.321	124.808	193.007	-0.783934	0.199426	3.66053e-06	0.000152512		WBGene00008572	F08B12.4	2710.07	1853.88	1802.24	2787.1	2996.62	1990.8	3399.96	2133.54	2459.28	-0.59611	0.076357	6.53504e-16	4.31261e-14
WBGene00044646	B0205.14	81.3162	99.4425	114.286	93.7459	16.6979	12.8521	18.8337	15.8149	56.6236	2.55119	0.264024	3.39539e-23	2.32757e-21		WBGene00015765	C14C11.1	165.403	120.43	160.675	105.192	155.924	96.8838	165.162	73.7894	130.432	-0.645271	0.163898	3.78406e-06	0.000156809		WBGene00018729	F53A9.6	303.103	169.998	201.701	368.644	395.908	180.54	451.275	168.704	279.984	-1.04213	0.135014	7.69807e-16	5.05995e-14
WBGene00000281	cah-3	2462.05	2291.53	2030.99	2156.94	1460.47	1512.76	1330.55	1441.75	1835.88	0.626781	0.0645081	3.49882e-23	2.38946e-21		WBGene00009308	F32A11.3	164.41	111.125	166.093	79.4191	139.315	105.341	163.372	99.3092	128.548	-0.614392	0.156649	4.19403e-06	0.000171944		WBGene00013037	Y49E10.18	969.4	656.551	687.968	947.138	974.576	552.295	1125.65	604.827	814.801	-0.664274	0.0856189	8.25297e-16	5.40325e-14
WBGene00013233	sdz-33	76.7918	72.6303	45.4924	67.3774	206.586	205.275	228.086	189.512	136.469	-1.63892	0.171952	8.12007e-23	5.4633e-21		WBGene00014169	ZK945.7	204.427	145.857	188.574	107.197	165.999	111.978	201.506	125.642	156.397	-0.575061	0.146728	4.33582e-06	0.000177284		WBGene00009877	F49C12.7	260.235	99.663	158.606	299.066	297.629	125.821	262.079	113.903	202.125	-1.13434	0.147401	9.14589e-16	5.96427e-14
WBGene00004859	sma-5	642.354	601.391	602.278	759.647	356.973	345.203	286.048	315.681	488.697	0.975537	0.102234	1.12968e-22	7.54475e-21		WBGene00008590	F08H9.2	275.556	202.734	252.584	141.97	208.392	159.295	286.306	157.176	210.501	-0.572329	0.146398	4.45691e-06	0.000181752		WBGene00010124	F55G11.4	680.849	376.116	450.569	730.546	640.496	449.583	652.275	411.364	548.975	-0.660559	0.0853118	9.74538e-16	6.3303e-14
WBGene00012464	arrd-7	486.111	485.826	456.592	439.585	265.71	258.194	265.572	241.393	362.373	0.843971	0.0884653	1.35478e-22	9.01499e-21		WBGene00003450	msp-57	1334.22	984.661	1366.99	643.917	1074.59	674.866	1380.07	733.857	1024.15	-0.685816	0.176417	4.48717e-06	0.000182502		WBGene00001399	fat-7	12368.7	5545.96	6345.38	12762.4	12324.1	7018.32	16753.3	6812.78	9991.37	-1.04231	0.137326	2.04928e-15	1.32079e-13
WBGene00011803	T16G12.1	2624.29	2197.99	2349.09	2446	3715.47	3507.05	3293.4	3685.84	2977.39	-0.55506	0.0579487	1.59781e-22	1.05934e-20		WBGene00011918	T22C1.8	101.074	72.134	121.062	48.6221	86.3929	59.3773	139.783	58.4872	85.8665	-0.819949	0.214279	5.60832e-06	0.000223374		WBGene00019978	hacd-1	3046.56	4322.21	4936.76	3560.1	2742.85	4789.87	3310.47	5091.11	3974.99	0.581495	0.075925	2.23356e-15	1.43277e-13
WBGene00020235	T05A12.4	2587.29	2442.62	2809.64	2189.67	3818.37	3915.67	4512.54	4007.45	3285.41	-0.683051	0.0717594	2.12997e-22	1.40702e-20		WBGene00003457	msp-64	585.051	458.915	578.285	313.79	419.437	309.045	554.835	334.005	444.17	-0.536311	0.14048	6.64719e-06	0.000262036		WBGene00020774	T24E12.5	102.898	23.0887	26.3531	114.708	122.953	47.5115	114.152	26.5895	72.2817	-1.81039	0.240884	3.52209e-15	2.21825e-13
WBGene00020550	T17H7.1	92.5505	86.4364	88.2042	83.7414	199.006	216.797	225.144	226.34	152.277	-1.27729	0.135317	2.63652e-22	1.72906e-20		WBGene00014247	ZK1307.4	161.565	87.9619	128.969	72.0007	96.4537	74.4663	172.933	73.568	108.49	-0.777288	0.205595	6.80724e-06	0.000266976		WBGene00009397	clec-66	1270.04	609.201	614.24	1283.9	1113.93	597.028	827.441	552.865	858.581	-0.894389	0.118925	3.95365e-15	2.48062e-13
WBGene00007404	best-5	198.023	230.828	189.301	151.301	57.7091	53.7967	66.3882	60.7852	126.016	1.65777	0.176258	3.37804e-22	2.19162e-20		WBGene00020413	T10E9.3	128.33	206.275	111.166	218.774	151.371	217.183	131.498	166.823	166.427	0.563827	0.148397	7.07244e-06	0.000276671		WBGene00077770	M04D5.3	402.654	270.545	277.197	535.983	457.338	254.815	475.888	249.784	365.525	-0.80724	0.107218	4.11618e-15	2.57285e-13
WBGene00010953	clec-190	110.538	97.6862	142.967	150.636	293.465	337.156	325.712	375.674	229.229	-1.38054	0.146949	3.68118e-22	2.37136e-20		WBGene00007190	rmd-3	289.338	216.895	273.637	155.614	216.956	152.459	276.686	168.402	218.749	-0.550057	0.14514	7.32857e-06	0.000285239		WBGene00019261	H34I24.2	4244.01	3312.94	2910.41	3969.95	4214.93	2807.43	4863.3	2954.11	3659.63	-0.514873	0.0682025	5.92948e-15	3.66477e-13
WBGene00011260	cnnm-5	111.299	74.7467	108.875	87.5563	10.977	13.9964	19.9085	13.2096	55.0711	2.67732	0.286751	6.56406e-22	4.16933e-20		WBGene00022754	nspd-1	469.475	400.064	533.363	248.148	369.953	281.442	487.717	250.548	380.089	-0.590255	0.156285	7.36074e-06	0.000285768		WBGene00019376	lipl-4	79.3992	20.599	12.4718	82.3527	65.6362	13.5886	88.1659	23.5106	48.2155	-2.10259	0.28445	8.23133e-15	5.04977e-13
WBGene00016785	C49G7.7	139.871	112.789	196.592	131.71	7.37713	14.0285	27.7968	25.6878	81.9816	2.89836	0.311518	8.1276e-22	5.09124e-20		WBGene00006053	ssq-4	861.811	505.174	665.378	338.278	588.282	433.614	868.164	335.254	574.494	-0.792014	0.211569	7.52137e-06	0.000291268		WBGene00022570	sdz-35	35.2566	3.29983	1.04791	55.0705	47.0116	2.90551	64.3624	5.31286	26.7834	-3.87182	0.51622	9.14547e-15	5.58987e-13
WBGene00016260	rege-1	952.098	870.747	1076.56	1109.45	608.312	530.784	551.91	575.941	784.475	0.80546	0.0861413	8.76828e-22	5.47369e-20		WBGene00015937	C17H12.12	204.42	147.668	218.012	111.45	154.688	132.567	222.402	105.744	162.119	-0.616874	0.164308	8.0291e-06	0.000310149		WBGene00003091	lys-2	6136.53	2989.46	2850.45	7291.11	6381.83	3359.27	4879.2	3242.31	4641.27	-0.957297	0.12958	1.01899e-14	6.20532e-13
WBGene00018602	F48D6.4	3453.86	3999.17	3695.43	4035.59	2414.54	2740.49	2223.96	2260.26	3102.91	0.644445	0.0688715	1.09601e-21	6.81856e-20		WBGene00007341	C05D12.4	109.407	197.5	145.552	216.543	141.574	182.498	133.387	197.654	165.514	0.524782	0.13927	8.25198e-06	0.000317165		WBGene00021876	Y54G2A.11	783.476	418.496	490.148	808.673	1123.91	534.866	937.94	504.613	700.265	-0.879105	0.118892	1.02385e-14	6.21209e-13
WBGene00023483	Y75B8A.39	69.9093	56.0416	101.535	94.1108	6.44972	6.43783	7.75883	7.05783	43.6626	3.46361	0.372379	1.39433e-21	8.55723e-20		WBGene00010123	F55G11.2	139.728	85.3214	142.324	92.8074	140.462	95.0095	140.449	90.1774	115.785	-0.561806	0.149542	8.45826e-06	0.000323476		WBGene00009628	tatn-1	1960.77	1162.19	1020.75	1724.33	1523.58	804.681	1969.51	1059.21	1403.13	-0.801036	0.108245	1.04942e-14	6.34398e-13
WBGene00020073	sdz-28	229.697	217.134	147.048	221.101	517.061	502.263	604.276	437.038	359.452	-1.31531	0.142728	1.79013e-21	1.09493e-19		WBGene00045355	D1086.17	180.559	129.47	159.457	98.9403	139.459	95.0471	197.996	75.5589	134.561	-0.689391	0.186425	9.48729e-06	0.000359255		WBGene00021082	zip-11	442.301	255.126	216.562	368.015	388.584	204.482	388.188	220.065	310.415	-0.799658	0.108387	1.27664e-14	7.63404e-13
WBGene00013508	Y71A12B.11	247.974	263.432	160.849	214.136	558.155	503.013	566.867	489.187	375.452	-1.23384	0.134018	2.1057e-21	1.27934e-19		WBGene00013473	Y69E1A.1	300.516	244.341	310.554	168.096	235.555	166.493	348.883	186.745	245.148	-0.578344	0.155779	9.60635e-06	0.00036287		WBGene00044457	C18H7.11	235.716	120.962	112.522	312.947	270.042	89.1637	228.934	132.897	187.898	-1.16707	0.159301	1.45345e-14	8.66004e-13
WBGene00000528	clh-1	695.323	639.294	559.871	608.911	1025.14	983.871	1007.07	973.099	811.573	-0.663002	0.0715483	2.31967e-21	1.40464e-19		WBGene00018773	F53G12.8	81.5206	49.8879	79.5825	30.8695	58.7612	34.8585	74.3838	25.4525	54.4146	-0.954649	0.259773	9.68451e-06	0.000364925		WBGene00003474	mtl-2	15.3866	70.1623	107.04	23.9584	24.184	77.4379	22.2342	93.3708	54.2218	1.94424	0.265588	1.54405e-14	9.16689e-13
WBGene00016920	C54E4.5	1103.83	956.38	896.012	1107.52	520.937	612.408	433	470.771	762.608	0.974739	0.106039	3.02205e-21	1.81784e-19		WBGene00010723	cpg-7	189.543	247.562	181.081	276.294	179.229	364.109	223.545	278.659	242.503	0.528839	0.141828	9.78375e-06	0.000366867		WBGene00001564	icl-1	10018.9	4309.61	3361.31	9786.4	12843	5508.89	10954.9	4321.52	7638.06	-1.27221	0.174328	1.63434e-14	9.66831e-13
WBGene00008390	D1086.3	638.825	562.295	626.31	538.232	934.677	915.258	987.911	1053.59	782.137	-0.703385	0.076195	3.18542e-21	1.90978e-19		WBGene00021472	Y39G10AR.16	127.181	80.4489	128.193	62.8615	94.093	67.7616	134.372	73.7297	96.0801	-0.68482	0.185824	1.02503e-05	0.000381054		WBGene00015044	cyp-34A9	167.657	100.737	81.2957	198.493	210.135	94.0231	209.155	78.5917	142.511	-1.11486	0.152655	1.7933e-14	1.05334e-12
WBGene00018731	F53A9.8	335.637	463.915	513.607	532.722	154.793	141.513	208.067	165.015	314.409	1.43406	0.156655	3.38981e-21	2.02563e-19		WBGene00017133	EEED8.2	56.1337	123.766	81.914	204.121	95.1504	193.82	94.5465	118.381	120.979	0.858891	0.234904	1.06467e-05	0.00039295		WBGene00004898	snb-2	538.257	349.939	356.621	578.388	576.254	364.811	627.384	405.617	474.659	-0.631554	0.0857203	1.80367e-14	1.05569e-12
WBGene00077701	poml-3	1174.93	1131.27	1045.59	988.908	653.628	729.213	693.912	659.073	884.564	0.655996	0.0710712	3.5296e-21	2.10225e-19		WBGene00009470	F36D3.4	172.832	111.028	168.197	91.7747	111.708	81.8408	173.135	60.1172	121.329	-0.771357	0.21226	1.1624e-05	0.000424483		WBGene00008793	F14D7.6	95.3487	221.617	208.713	106.882	73.829	176.863	87.6975	229.443	150.049	1.16608	0.16025	2.04694e-14	1.18967e-12
WBGene00000116	alh-10	895.004	773.262	710.098	670.934	1326.57	1382.94	1339.72	1204.09	1037.83	-0.769339	0.0841158	5.95242e-21	3.49941e-19		WBGene00012926	Y47D3A.13	74.9593	46.4525	91.4445	42.2004	97.5321	50.8599	77.0257	46.3709	65.8557	-0.768284	0.211783	1.23056e-05	0.000447249		WBGene00007932	zip-5	356.11	167.633	136.427	423.273	419.072	178.992	415.469	76.3231	271.663	-1.49231	0.206221	2.1128e-14	1.22365e-12
WBGene00003374	mlk-1	768.007	826.125	754.585	828.377	495.199	541.468	487.714	482.91	648.048	0.650399	0.071031	6.87773e-21	4.01739e-19		WBGene00020116	moa-1	111.662	68.0761	93.947	53.6824	80.6149	46.0561	104.09	49.2469	75.9219	-0.759429	0.210218	1.24816e-05	0.000452576		WBGene00007384	swt-3	1161.35	1652.67	1943.06	963.592	1042.77	1720.59	1263.52	1637.53	1423.13	0.633255	0.0863158	2.25518e-14	1.30156e-12
WBGene00002259	lbp-7	558.855	660.355	636.91	755.344	364.432	352.383	355.81	337.494	502.698	0.869804	0.095969	1.12726e-20	6.56342e-19		WBGene00007354	C06A1.3	78.0781	47.9553	81.9656	40.2244	65.2366	40.4439	84.7791	38.2651	59.6185	-0.798128	0.2205	1.26553e-05	0.000456721		WBGene00019738	clec-265	1769.47	1032.28	1003.01	1799.71	1540.22	1014.28	1323.94	1006.42	1311.17	-0.646498	0.0881651	2.27741e-14	1.30983e-12
WBGene00009981	F53F1.3	426.527	383.384	399.676	404.407	665.027	665.128	612.361	713.168	533.71	-0.707642	0.0778603	1.14022e-20	6.61766e-19		WBGene00007307	spch-1	271.338	209.574	222.889	123.61	206.009	128.034	289.203	118.28	196.117	-0.690949	0.191552	1.32309e-05	0.000475262		WBGene00010724	K09E9.1	479.908	285.863	258.116	429.866	400.346	256.426	471.856	227.616	351.25	-0.766549	0.105221	2.60831e-14	1.49495e-12
WBGene00000783	cpr-3	1263.62	1308.12	1650.88	1721.15	398.578	424.938	549.959	577.939	986.898	1.5711	0.174456	1.29737e-20	7.50576e-19		WBGene00020105	R148.7	122.554	53.6407	99.1127	57.7113	71.9496	54.5841	97.2379	43.6936	75.0605	-0.800651	0.222244	1.33834e-05	0.000479376		WBGene00016920	C54E4.5	1044.3	652.252	606.868	906.816	849.966	598.557	1057.15	627.999	792.989	-0.613064	0.0842298	3.50934e-14	1.99755e-12
WBGene00018877	aman-1	1143.54	924.476	1099.6	930.078	1606.14	1601.76	1661.37	1592.32	1319.91	-0.643351	0.0708308	1.3667e-20	7.88175e-19		WBGene00016054	C24D10.2	85.3687	37.7211	68.7265	44.2518	64.4387	37.245	75.186	34.8626	55.9751	-0.828666	0.229868	1.3439e-05	0.000479376		WBGene00012339	W07G4.5	609.296	884.187	1009.57	685.569	653.502	955.412	689.901	1064.06	818.938	0.55314	0.0757428	3.5343e-14	2.00487e-12
WBGene00021118	clec-125	91.4526	91.2432	100.749	112.753	24.7007	19.3787	24.3334	16.7326	60.168	2.17033	0.241032	1.43414e-20	8.24449e-19		WBGene00000684	col-110	101.152	153.062	78.7002	138.168	77.4288	134.527	82.1577	122.047	110.905	0.604112	0.167663	1.46929e-05	0.00052048		WBGene00021079	W08A12.2	338.067	213.542	204.817	368.664	391.081	238.744	397.142	215.395	295.931	-0.751359	0.104041	4.46531e-14	2.52435e-12
WBGene00020834	T27A1.2	347.241	350.421	395.102	431.891	183.923	181.299	199.227	193.454	285.32	0.986218	0.109274	1.46586e-20	8.40026e-19		WBGene00016147	cyp-32A1	169.666	124.172	161.863	108.341	222.124	111.893	182.715	133.075	151.731	-0.550756	0.153413	1.58515e-05	0.000556394		WBGene00020261	vet-1	399.696	627.928	625.359	381.784	368.619	823.705	430.674	643.162	537.616	0.76188	0.105774	4.92967e-14	2.77738e-12
WBGene00020325	bath-46	73.4922	57.1323	69.8631	73.3991	5.50949	9.67218	7.75069	4.40736	37.6533	3.27447	0.362251	1.47718e-20	8.43849e-19		WBGene00010474	K01D12.15	80.931	46.1604	66.6897	43.2125	68.7437	36.781	82.4401	31.782	57.0925	-0.821707	0.231403	1.61143e-05	0.000563047		WBGene00008634	F10A3.4	70.8128	141.056	178.76	62.5394	62.403	136.998	64.1173	163.066	109.969	1.21301	0.16953	5.16164e-14	2.89822e-12
WBGene00044290	B0035.18	290.141	268.279	257.38	279.561	491.475	455.9	463.841	514.932	377.689	-0.803168	0.0888926	1.59776e-20	9.09869e-19		WBGene00015467	basl-1	61.4646	26.9353	49.6331	21.6665	54.1552	24.4485	75.0346	36.4559	43.7242	-0.997654	0.281278	1.63582e-05	0.000568983		WBGene00008492	F01D5.1	344.508	156.258	132.255	320.409	297.595	120.933	243.034	85.9887	212.623	-1.24032	0.173606	5.33829e-14	2.98728e-12
WBGene00012259	sulp-7	279.863	263.783	263.667	283.193	467.069	497.662	447.219	471.541	371.75	-0.775931	0.0858924	1.67474e-20	9.50732e-19		WBGene00006956	wrt-10	39.5253	72.4701	46.3642	197.993	68.57	170.262	37.0987	68.3176	87.5751	1.24527	0.354076	1.64365e-05	0.000570417		WBGene00019605	ctsa-1	1210.85	1984.48	1756.99	1227.69	1226.17	1597.72	1340.84	1899.92	1530.58	0.517484	0.0714365	5.89816e-14	3.28946e-12
WBGene00077770	M04D5.3	426.001	565.801	482.56	499.024	244.062	242.97	256.822	271.441	373.585	0.93866	0.10443	2.16997e-20	1.22421e-18		WBGene00010485	ant-1.3	84.596	44.4018	72.2329	42.2759	77.4274	46.0961	77.7394	40.0757	60.6057	-0.75307	0.212261	1.6869e-05	0.000581489		WBGene00016783	irg-2	104.769	15.3981	19.928	111.055	169.475	46.4961	124.002	23.3799	76.813	-2.18501	0.306725	6.11396e-14	3.39838e-12
WBGene00004172	pqn-92	994.905	1075.68	1162.59	1060.13	729.004	719.84	684.853	651.854	884.856	0.615377	0.0680907	2.29995e-20	1.29352e-18		WBGene00011910	alg-3	199.352	152.914	187.636	117.544	166.575	89.1942	191.216	110.214	151.831	-0.595305	0.167766	1.74657e-05	0.000600533		WBGene00001158	ech-9	105.972	14.2941	54.7562	156.008	179.143	19.3884	209.154	15.951	94.3333	-2.54072	0.360126	8.53517e-14	4.72831e-12
WBGene00001791	gst-43	173.774	184.602	180.328	178.516	315.891	350.933	352.423	358.141	261.826	-0.919881	0.102548	2.57365e-20	1.43802e-18		WBGene00007758	C27A7.8	32.4612	56.7836	35.4716	69.9622	27.7083	59.3765	26.5852	59.0753	45.928	0.885909	0.25096	1.74996e-05	0.000600533		WBGene00001753	gst-5	689.51	503.593	483.808	691.74	677.052	440.242	677.161	424.653	573.47	-0.546885	0.0764268	1.04727e-13	5.78234e-12
WBGene00000515	ckc-1	641.627	671.114	654.02	748.42	1027.53	1033.54	1022.2	986.036	848.061	-0.575659	0.0637543	2.58062e-20	1.43802e-18		WBGene00018375	F43C9.1	65.1891	29.2536	30.2025	12.3782	42.0103	15.9881	63.5755	9.11185	33.4636	-1.41939	0.405932	1.76146e-05	0.000603134		WBGene00016204	gsto-1	305.799	664.407	656.473	271.688	282.959	435.752	338.239	711.824	458.393	1.00764	0.142647	1.05307e-13	5.79503e-12
WBGene00007689	C18E9.9	801.116	879.887	889.41	912.736	494.19	545.968	538.698	589.481	706.436	0.670614	0.0744782	2.73394e-20	1.5188e-18		WBGene00000741	col-168	112.199	79.4441	104.57	54.6471	87.387	35.749	112.197	46.4495	79.0804	-0.844169	0.240913	1.8254e-05	0.000622256		WBGene00020940	W02D7.4	131.666	239.797	301.636	157.871	127.196	253.721	139.155	293.244	205.536	0.93734	0.132566	1.0942e-13	6.00144e-12
WBGene00016953	C55C3.3	337.9	332.749	359.109	406.937	612.575	631.692	580.831	608.673	483.808	-0.748479	0.0833189	2.74282e-20	1.51909e-18		WBGene00011491	T05F1.5	139.589	88.9133	122.959	52.6044	82.921	54.5497	131.574	55.5791	91.0861	-0.822081	0.234657	1.85857e-05	0.000632159		WBGene00016219	pals-24	208.472	63.7938	48.2294	185.4	138.686	58.116	129.798	63.7595	112.032	-1.44711	0.206478	1.35613e-13	7.41352e-12
WBGene00008167	acox-1.5	2045	2299.52	1934.55	1932.41	1416.18	1109.97	1066.24	1121.09	1615.62	0.78387	0.0872876	2.78685e-20	1.53412e-18		WBGene00011336	ubxn-5	127.764	84.7445	111.869	48.3727	89.7816	46.1542	119.53	62.7326	86.3685	-0.793096	0.226416	1.87759e-05	0.000637221		WBGene00010047	F54D1.6	2005.82	1314.77	1408.22	2084.43	2478.2	1637.94	2615.01	1393.04	1867.18	-0.652271	0.0921254	1.40222e-13	7.62841e-12
WBGene00015633	C09D4.2	458.397	450.224	434.61	444.077	731.984	681.289	693.171	673.477	570.904	-0.62675	0.0696651	3.15272e-20	1.73028e-18		WBGene00008584	irg-4	213.407	148.629	252.578	149.683	160.508	113.928	289.984	140.426	183.643	-0.646497	0.183647	1.89177e-05	0.000640617		WBGene00019977	fpn-1.2	112.197	236.406	233.723	86.2638	86.1196	178.367	96.0259	195.66	153.095	1.11255	0.158688	1.44942e-13	7.84581e-12
WBGene00017329	ugt-39	652.674	627.688	715.98	814.786	354.756	398.058	394.231	399.953	544.766	0.843272	0.0944443	3.98884e-20	2.18257e-18		WBGene00014179	ZK1010.5	140.164	91.4689	147.892	78.4402	88.3736	58.2851	172.063	65.6458	105.292	-0.799372	0.229476	2.00943e-05	0.000674518		WBGene00022329	fbxa-79	179.523	90.1827	87.136	168.872	177.867	86.2275	182.36	82.9049	131.884	-0.995419	0.141841	1.56456e-13	8.44151e-12
WBGene00013654	Y105C5B.15	3037.02	3053.29	2730.59	2474.52	1795.23	1954.58	1674.29	1830.79	2318.79	0.627141	0.0699062	4.03517e-20	2.20129e-18		WBGene00008074	nkb-2	106.55	57.3143	91.6731	66.0099	79.6098	44.2058	102.44	41.9098	73.7141	-0.765072	0.219565	2.03571e-05	0.000680491		WBGene00077593	C49G7.12	63.9269	8.44829	10.3452	75.5309	84.5609	23.318	66.3356	13.9898	43.3069	-2.26078	0.322106	1.61787e-13	8.7008e-12
WBGene00045457	F33H12.7	425.089	502.819	642.446	648.964	9.23098	5.36066	28.8224	32.6628	286.924	4.74863	0.53696	4.81574e-20	2.61143e-18		WBGene00015268	BE0003N10.3	54.7452	77.0906	49.0484	85.3241	49.5113	119.208	43.0635	81.7308	69.9652	0.783654	0.224313	2.03607e-05	0.000680491		WBGene00019830	hrg-1	404.839	1427.56	1554.89	419.287	660.225	1398.02	670.658	1576.48	1014	1.41305	0.203325	2.04067e-13	1.0939e-11
WBGene00020247	T05B11.4	453.215	452.908	446.846	457.532	678.815	697.183	680.492	702.125	571.139	-0.597312	0.0669751	6.90375e-20	3.72147e-18		WBGene00020661	smz-2	289.588	199.849	279.249	156.739	185.812	154.275	266.77	143.006	209.411	-0.572159	0.163756	2.18102e-05	0.000722652		WBGene00044534	H23N18.6	121.025	30.8125	17.6954	115.673	98.1913	15.4786	75.2677	35.0275	63.6463	-1.98089	0.288344	3.38359e-13	1.7849e-11
WBGene00018729	F53A9.6	317.296	385.048	413.335	468.223	146.188	154.287	180.262	188.95	281.699	1.21313	0.137317	6.97255e-20	3.74744e-18		WBGene00015627	C09B9.2	98.3617	52.5951	92.7258	50.5284	66.36	56.4413	127.199	40.9897	73.1501	-0.82889	0.2418	2.49694e-05	0.000818506		WBGene00009432	cld-9	312.463	195.043	169.49	377.17	369.872	228.786	420.075	163.19	279.511	-0.931773	0.134981	3.43579e-13	1.80668e-11
WBGene00020261	vet-1	423.089	403.231	389.148	451.844	759.144	760.359	977.265	704.031	608.514	-0.921176	0.104183	7.49641e-20	4.0171e-18		WBGene00007320	C05B5.2	129.332	95.3832	138.857	74.1435	115.224	77.2126	139.783	85.5058	106.93	-0.579482	0.167651	2.52356e-05	0.000825472		WBGene00013007	Y48E1B.8	633.334	1006.21	1163.72	577.261	458.613	1151.29	400.8	827.101	777.291	0.967042	0.140209	3.65761e-13	1.91724e-11
WBGene00022236	Y73B6BL.12	116.497	114.776	96.6561	94.3214	215.27	266.861	288.337	257.816	181.317	-1.25229	0.142501	1.00533e-19	5.34e-18		WBGene00005012	F26F4.2	103.549	70.9007	102.231	41.1842	74.2399	47.0877	108.857	51.8378	74.9859	-0.781063	0.228178	2.54189e-05	0.000829703		WBGene00001397	fat-5	4574.14	2387.55	2365.49	4351.14	4280	2740.19	5957.97	2545.83	3650.29	-0.898821	0.130289	3.70936e-13	1.93823e-11
WBGene00007766	C27C7.1	1237.83	1214.19	1108.11	1075.94	1817.08	1762.32	1570.69	1804.77	1448.87	-0.575289	0.0648219	1.08636e-19	5.75361e-18		WBGene00012207	W02B12.12	239.401	171.29	210.507	106.633	174.872	149.686	250.045	115.083	177.19	-0.60974	0.177602	2.64244e-05	0.000857288		WBGene00018594	aman-3	326.521	226.468	182.589	401.92	479.996	195.911	377.303	212.758	300.433	-0.925481	0.134187	3.79872e-13	1.97603e-11
WBGene00019599	acds-10	1158.46	1050.96	1040.78	1035.95	1625.54	1467.68	1495.46	1531.1	1300.74	-0.506624	0.0569803	1.12708e-19	5.9519e-18		WBGene00020990	W03D8.9	334.88	267.249	340.155	180.159	250.455	203.012	372.978	212.793	270.21	-0.522127	0.151184	2.6487e-05	0.000857288		WBGene00003571	ncx-6	189.114	315.561	324.442	161.512	149.132	268.549	169.081	306.277	235.459	0.834853	0.120932	3.80557e-13	1.97603e-11
WBGene00013946	ZK228.3	536.689	452.355	517.485	520.806	831.539	825.545	838.069	750.928	659.177	-0.665886	0.0754419	1.31379e-19	6.91777e-18		WBGene00020713	T23B3.5	164.084	87.4249	92.6362	56.675	107.385	62.1175	121.12	49.15	92.5741	-0.819094	0.240799	2.67036e-05	0.00086248		WBGene00017658	F21C10.9	424.844	253.498	219.762	360.182	358.367	201.198	411.203	218.132	305.898	-0.771228	0.111742	4.12397e-13	2.13467e-11
WBGene00011262	pho-8	242.973	252.08	261.603	224.65	85.2345	122.626	109.557	94.2733	174.124	1.23436	0.14096	1.35404e-19	7.0886e-18		WBGene00012177	decr-1.2	79.0845	33.8832	73.3092	26.8086	44.2454	31.0448	60.9561	31.8778	47.6512	-0.928848	0.272724	2.6985e-05	0.000869742		WBGene00012529	Y32F6A.4	1459.98	1123.7	1047.19	1530.69	1409.75	848.323	1607.2	946.498	1246.67	-0.580273	0.0837468	4.8093e-13	2.46629e-11
WBGene00009578	F40F8.5	4864.42	4782.56	5760.94	4683.05	3251.48	3484.64	3448.2	3522.64	4224.74	0.542842	0.0613571	1.56273e-19	8.13423e-18		WBGene00019255	H32C10.1	45.4384	32.48	77.2008	24.1574	42.4693	17.1305	67.8875	26.0724	41.6046	-1.06644	0.31614	2.775e-05	0.000892527		WBGene00012777	lact-8	65.0769	169.46	199.019	86.6928	91.2531	209.585	87.3893	164.045	134.065	1.12102	0.164314	5.91625e-13	2.99684e-11
WBGene00010158	pes-2.2	798.93	759.38	519.921	728.931	1461.26	1294.17	1660.67	1335.3	1069.82	-1.01326	0.116765	2.95645e-19	1.51714e-17		WBGene00003094	lys-5	97.8498	44.232	82.9026	66.9534	96.368	40.4832	78.7191	34.5725	67.7601	-0.818561	0.241319	2.78747e-05	0.000892803		WBGene00020258	T05E7.1	199.432	428.841	488.315	223.922	126.127	362.523	122.373	389.169	292.588	1.26254	0.185696	6.13601e-13	3.09868e-11
WBGene00003977	pes-2.1	798.93	759.38	519.921	728.931	1461.26	1294.17	1660.67	1335.3	1069.82	-1.01326	0.116765	2.95645e-19	1.51714e-17		WBGene00009948	F52H3.6	198.478	121.603	166.068	108.287	127.171	89.3584	170.459	91.0988	134.065	-0.612461	0.179404	2.82987e-05	0.000904501		WBGene00003997	pgp-3	1246.69	893.995	934.144	1190.8	1389.66	928.969	1510.59	880.663	1121.94	-0.53503	0.0776689	7.25556e-13	3.63085e-11
WBGene00020245	T05B11.1	449.438	431.327	413.519	469.888	229.221	264.56	214.713	187.685	332.544	0.956265	0.110586	4.14849e-19	2.11097e-17		WBGene00014246	ZK1307.3	23.2217	9.25654	31.1725	7.2003	27.724	14.1379	38.1164	9.08255	19.989	-1.38403	0.413322	3.38374e-05	0.00105094		WBGene00017478	F15A8.6	376.761	230.36	242.416	362.856	446.787	240.975	470.328	243.576	326.757	-0.762613	0.111728	7.30655e-13	3.64535e-11
WBGene00018907	F55G1.15	413.144	375.628	348.559	400.665	143.643	202.391	109.503	120.654	264.273	1.38327	0.160584	4.31487e-19	2.1895e-17		WBGene00043147	nspd-6	189.998	134.861	186.219	90.5547	144.012	115.958	183.402	114.515	144.94	-0.551171	0.163224	3.4072e-05	0.0010561		WBGene00017703	F22E5.1	321.88	200.14	186.1	333.139	310.077	136.648	303.403	146.714	242.263	-0.889694	0.133019	1.59608e-12	7.93191e-11
WBGene00007453	fbxa-98	198.482	170.352	157.498	162.294	65.4719	46.1883	68.5987	45.8035	114.336	1.56937	0.18243	4.76783e-19	2.4126e-17		WBGene00011175	R09E10.5	16.472	51.6521	33.4773	147.633	45.2743	124.066	23.816	41.9529	60.5429	1.41067	0.428218	3.50189e-05	0.00108326		WBGene00003095	lys-6	224.781	111.118	120.188	209.29	196.783	100.674	220.18	78.5986	157.702	-1.00885	0.151072	1.59941e-12	7.93191e-11
WBGene00016540	C39F7.5	326.183	285.396	332.312	308.247	520.494	522.172	508.774	531.028	416.826	-0.717576	0.0828773	5.51553e-19	2.76782e-17		WBGene00000989	dhs-26	132.308	99.3946	145.584	55.6916	86.2528	38.5646	173.105	61.9486	99.106	-0.93792	0.285567	3.81953e-05	0.00116511		WBGene00017819	F26D11.2	53.9876	4.39875	5.25581	36.7099	57.7133	8.7218	57.2618	11.6941	29.4679	-2.65261	0.397616	1.82854e-12	9.01426e-11
WBGene00008634	F10A3.4	75.0258	66.1129	65.9385	67.3305	197.17	190.883	158.496	167.672	123.579	-1.34986	0.157398	6.50892e-19	3.24838e-17		WBGene00018122	ttbk-2	98.3648	54.9309	73.3172	36.0914	61.9367	39.5092	85.6835	37.3458	60.8974	-0.816768	0.247401	3.85602e-05	0.00117391		WBGene00010851	M04C3.2	260.852	100.832	165.843	298.693	276.94	143.469	298.493	94.4248	204.943	-1.12053	0.169765	2.54408e-12	1.23941e-10
WBGene00022592	klu-2	366.521	328.871	268.925	364.92	146.504	165.726	144.931	138.295	240.586	1.12807	0.131948	8.43107e-19	4.16193e-17		WBGene00010510	ent-3	76.0455	45.7293	92.8336	47.4756	57.4451	31.9635	95.2999	41.9391	61.0915	-0.825841	0.250507	3.91272e-05	0.00118647		WBGene00019731	M02D8.5	74.8579	158.313	179.342	77.0816	88.3388	192.015	88.9577	158.493	127.175	1.0223	0.154624	2.59712e-12	1.26155e-10
WBGene00001425	fis-2	949.335	906.848	921.904	940.643	642.742	641.391	668.388	653.053	790.538	0.503912	0.058181	9.35e-19	4.60304e-17		WBGene00019561	K09C6.7	195.645	135.7	168.013	86.7145	122.776	87.5361	191.238	88.4956	134.515	-0.674337	0.204269	3.99637e-05	0.0012		WBGene00015859	C16D9.4	182.746	107.767	87.2688	217.504	236.21	114.358	196.922	97.8093	155.073	-0.995627	0.150867	2.88227e-12	1.39596e-10
WBGene00008850	F15B9.6	57.2292	75.6656	109.682	88.8349	9.15718	6.45661	14.3828	12.3322	46.7176	2.89697	0.339868	1.17144e-18	5.75143e-17		WBGene00013987	ZK512.8	146.966	86.0279	119.456	73.105	97.5048	60.2746	118.581	70.0295	96.4931	-0.648556	0.196159	4.04233e-05	0.00121144		WBGene00022592	klu-2	345.945	189.124	141.08	311.1	254.511	155.103	347.511	156.316	237.586	-0.931135	0.141728	3.38305e-12	1.62426e-10
WBGene00006649	tth-1	706.587	775.442	718.885	786.013	478.617	491.662	480.885	501.843	617.492	0.599174	0.0697063	1.20637e-18	5.90697e-17		WBGene00021288	clec-123	153.112	69.1344	129.504	77.3921	85.0834	64.8755	113.855	65.6313	94.8235	-0.695905	0.211523	4.1919e-05	0.00125138		WBGene00017320	F09G8.5	131.91	64.8765	64.1894	144.999	128.441	45.5567	196.737	46.7845	102.937	-1.38086	0.211807	3.83681e-12	1.8315e-10
WBGene00008572	F08B12.4	2854.87	2929.5	3148.28	3549.91	1722.64	1844.89	2117.16	2089.55	2532.1	0.668845	0.0780463	1.28203e-18	6.26057e-17		WBGene00019376	lipl-4	37.0509	17.9837	43.4361	16.8455	42.4842	21.4516	44.96	18.3817	30.3242	-1.01241	0.3096	4.32351e-05	0.00128568		WBGene00194717	ZC239.22	51.7119	8.80366	10.4056	61.5108	57.2231	15.478	78.7733	18.043	37.7437	-2.136	0.326904	3.91391e-12	1.86293e-10
WBGene00017335	F10D2.10	316.333	405.06	385.891	409.927	185.279	169.891	210.309	179.771	282.808	1.00345	0.117855	1.32597e-18	6.44055e-17		WBGene00008964	mltn-9	87.0011	31.6725	72.3351	31.9981	103.827	66.7417	86.4638	41.0324	65.134	-0.878475	0.27	4.51334e-05	0.00133696		WBGene00077525	C41G7.8	114.513	51.7391	69.4139	152.49	144.959	52.2085	146.614	59.4118	98.9187	-1.21238	0.185575	3.98063e-12	1.88926e-10
WBGene00003997	pgp-3	1322.41	1260.32	1470.11	1588.15	925.907	917.361	906.639	873.849	1158.09	0.625051	0.0732516	1.93815e-18	9.28983e-17		WBGene00015051	B0218.7	160.873	88.8266	147.714	64.965	102.858	63.9669	102.466	76.5139	101.023	-0.698837	0.215745	4.91378e-05	0.00145278		WBGene00019368	K03H6.2	38.992	92.7104	148.96	36.1616	39.5026	121.502	56.4722	117.782	81.5103	1.4487	0.224214	5.15676e-12	2.43352e-10
WBGene00019738	clec-265	1870.27	1898.01	1623.6	1386.98	927.392	1059.62	917.147	810.999	1311.75	0.849242	0.10013	2.0414e-18	9.75897e-17		WBGene00009938	F52F12.5	65.6612	33.6989	72.0925	40.1492	60.9487	44.2624	82.3178	32.7384	53.9836	-0.774815	0.240526	5.23809e-05	0.00153684		WBGene00013197	ttm-5	377.958	245.225	241.839	407.475	362.387	253.916	460.225	215.82	320.606	-0.716578	0.109839	5.96677e-12	2.80777e-10
WBGene00020952	kel-8	2272.49	2291.07	1981.49	2587.43	1529.07	1517.77	1482.56	1449.99	1888.98	0.597157	0.0700031	2.08897e-18	9.91183e-17		WBGene00008492	F01D5.1	151.786	95.2211	158.143	111.161	138.532	97.0139	137.23	87.2858	122.047	-0.506811	0.156185	5.58797e-05	0.00161543		WBGene00016190	C28G1.5	568.229	348.292	411.264	550.503	531.992	356.391	552.936	374.273	461.735	-0.543881	0.0827038	6.05786e-12	2.84256e-10
WBGene00002058	ifd-2	1013.49	1003.96	1049.69	1147.75	493.624	600.435	635.073	686.218	828.78	0.784904	0.0924637	2.08975e-18	9.91183e-17		WBGene00007610	C15H7.3	68.8762	38.6069	62.5578	30.9437	63.02	23.5128	46.8017	27.334	45.2066	-0.86771	0.274948	6.1326e-05	0.00174789		WBGene00018731	F53A9.8	320.084	184.087	213.021	443.404	491.123	236.297	512.575	240.551	330.143	-0.973424	0.150991	7.64907e-12	3.56899e-10
WBGene00004989	spp-4	473.716	497.386	432.386	373.313	846.516	841.985	700.476	786.007	618.973	-0.81645	0.096284	2.19661e-18	1.03916e-16		WBGene00010265	F58G1.3	103.79	59.6564	110.01	50.5394	84.0312	50.7892	71.5305	49.1991	72.4431	-0.701467	0.220938	6.16632e-05	0.00175233		WBGene00021340	Y34F4.5	538.193	379.843	330.977	520.739	535.11	372.95	555.451	381.885	451.893	-0.532413	0.0816961	9.30413e-12	4.31691e-10
WBGene00000830	ctl-1	2185.1	2051.28	2124.22	2009.67	1565.11	1264.7	1485.4	1385.1	1758.82	0.543349	0.0636288	2.32307e-18	1.09613e-16		WBGene00021458	Y39G10AL.1	265.482	391.666	190.964	398.682	326.571	429.393	190.145	302.935	311.98	0.563153	0.177194	6.39051e-05	0.00179612		WBGene00006429	arrd-3	59.9944	8.21059	3.78302	33.0671	35.9408	7.22947	68.7063	3.14737	27.5099	-3.01199	0.471087	1.04076e-11	4.80198e-10
WBGene00001243	elo-5	10901.2	11384.6	9717.66	11227.5	7524.43	8338.98	6913.09	7448.92	9182.05	0.506637	0.0592638	2.35963e-18	1.11049e-16		WBGene00021880	Y54G2A.15	45.36	24.382	37.6514	18.5263	38.792	14.1283	44.2675	17.2747	30.0478	-1.00705	0.321305	6.64781e-05	0.00185824		WBGene00004969	spe-15	803.52	619.23	604.754	842.797	989.158	522.343	1099.5	553.801	754.388	-0.672116	0.104543	1.19437e-11	5.49543e-10
WBGene00015342	C02E7.10	251.07	284.378	265.46	136.506	0	0	2.21961	0	117.454	8.65936	0.982492	2.83692e-18	1.32482e-16		WBGene00001603	gln-2	302.12	195.385	256.708	102.116	178	158.005	272.858	148.517	201.714	-0.639872	0.203854	6.95928e-05	0.00194178		WBGene00008598	spin-3	49.8706	124.248	130.583	56.8969	56.8931	168.682	25.1419	132.927	93.1552	1.47653	0.232664	1.36796e-11	6.24211e-10
WBGene00020359	math-40	35.1113	21.307	25.9959	38.4964	123.015	123.604	107.395	102.245	72.146	-1.88513	0.225765	3.67165e-18	1.70586e-16		WBGene00010650	K08C9.1	63.478	46.7167	62.5193	31.9606	57.5273	27.2839	72.45	26.41	48.5432	-0.82941	0.266542	7.13916e-05	0.0019854		WBGene00007660	pals-6	100.735	37.3875	25.2452	117.469	91.5412	32.9535	84.6801	41.4655	66.4346	-1.46014	0.231847	1.75008e-11	7.89874e-10
WBGene00020732	T23E7.2	2201.74	1791.57	2096.07	2002.63	1350.18	1385.14	1435.14	1272.28	1691.84	0.56153	0.0663824	4.29054e-18	1.97822e-16		WBGene00022157	Y71G12B.22	57.0928	39.6727	57.1107	19.584	44.2665	15.0558	51.2604	16.3881	37.5539	-1.05129	0.342508	7.63956e-05	0.00210485		WBGene00011364	T02B5.3	140.324	303.447	363.729	144.99	203.626	288.956	130.11	302.064	234.656	0.970644	0.153503	1.83647e-11	8.26612e-10
WBGene00012717	Y39E4B.6	209.28	206.602	150.921	194.57	488.459	451.745	375.46	371.69	306.091	-1.12448	0.134567	4.37471e-18	2.01192e-16		WBGene00003470	msp-152	1062.03	764.794	982.248	526.68	764.127	476.035	1091.84	551.269	777.377	-0.641691	0.208798	8.5588e-05	0.00233718		WBGene00015949	C18A11.3	617.127	387.161	394.237	559.87	544.717	335.138	627.139	416.565	485.244	-0.591157	0.0926103	1.88603e-11	8.46617e-10
WBGene00021641	Y47G6A.15	163.475	125.9	190.094	198.507	54.1664	56.9635	55.3591	53.7673	112.279	1.5799	0.189419	4.53866e-18	2.08205e-16		WBGene00018301	F41G3.5	56.085	36.2261	56.0634	32.9967	49.773	26.3401	72.4366	24.5926	44.3142	-0.832043	0.274439	9.37229e-05	0.00253233		WBGene00011262	pho-8	229.48	79.1754	120.927	238.611	247.739	121.145	214.069	132.895	173.005	-0.989538	0.157002	1.99667e-11	8.91449e-10
WBGene00002274	lec-11	668.706	701.826	814.34	801.257	346.437	400.513	418.311	466.332	577.215	0.85195	0.101542	4.56135e-18	2.08719e-16		WBGene00044633	F54H12.7	64.8794	39.4177	59.1321	34.9834	60.9705	36.7527	67.332	20.9061	48.0467	-0.803339	0.265479	9.49496e-05	0.00255649		WBGene00003959	pcp-4	720.604	547.485	465.394	648.763	761.122	439.336	771.802	436.147	598.832	-0.597324	0.0937537	2.02568e-11	9.01972e-10
WBGene00194695	B0462.5	81.9061	71.493	59.2967	67.5758	11.059	11.8017	12.1927	5.2937	40.0773	2.73949	0.328008	4.67231e-18	2.12667e-16		WBGene00021095	mlt-8	40.447	67.7904	51.7543	170.147	69.6775	128.874	50.3493	81.0689	82.5136	0.919259	0.306021	9.73342e-05	0.00261155		WBGene00015052	clec-52	308.189	112.179	119.672	228.529	224.074	134.668	216.787	121.167	183.158	-0.957039	0.152727	2.51212e-11	1.11259e-09
WBGene00009830	cutl-18	131.186	140.786	106.439	123.505	299.941	310.122	264.316	245.679	202.747	-1.13204	0.135687	4.94454e-18	2.23996e-16		WBGene00021993	Y59E9AL.3	864.491	585.911	690.203	495.052	656.821	360.242	957.339	435.476	630.692	-0.644407	0.212761	9.8111e-05	0.00262323		WBGene00008366	tpra-1	664.357	356.489	430.582	532.573	674.86	376.656	812.281	382.558	528.795	-0.760007	0.120871	2.57923e-11	1.13926e-09
WBGene00023417	swm-1	295.125	310.235	308.244	280.357	459.902	538.584	500.249	521.121	401.727	-0.737548	0.0880227	5.91173e-18	2.66483e-16		WBGene00009429	irg-5	100.174	75.99	114.3	42.2817	72.9893	43.2696	123.655	60.1225	79.0978	-0.764271	0.253996	9.96611e-05	0.00264171		WBGene00009431	dct-17	319.091	164.255	143.469	289.868	275.685	162.83	468.404	157.177	247.597	-1.05395	0.169734	3.23441e-11	1.42108e-09
WBGene00006929	vit-5	108986	102442	102422	84413.7	137632	142939	144683	143547	120883	-0.503339	0.0597714	6.03772e-18	2.71488e-16		WBGene00015613	C08F1.10	95.6778	149.492	111.025	203.104	139.394	262.49	110.442	149.353	152.622	0.637111	0.210531	0.000101221	0.00267		WBGene00001046	dnj-28	1573.08	1098.43	994.234	1718.83	1675.17	1238.97	1742.55	1312.28	1419.19	-0.511406	0.0809706	3.69908e-11	1.62094e-09
WBGene00003091	lys-2	6488.28	7691.91	6729.57	5113.21	2710.09	3148.65	3218.87	2905.42	4750.75	1.08985	0.131788	8.88497e-18	3.95599e-16		WBGene00007793	C28D4.5	117.601	59.6398	122.94	70.1311	75.1934	57.3761	98.0321	55.5723	82.0606	-0.656695	0.217348	0.000101434	0.0026703		WBGene00022593	ZC328.3	818.569	583.79	620.376	952.312	1144.87	655.961	966.832	644.741	798.431	-0.609049	0.0970711	3.75665e-11	1.64183e-09
WBGene00010397	suox-1	796.344	678.854	704.447	703.817	1035.04	1087.41	1067.05	1025.62	887.323	-0.537612	0.0641593	8.9139e-18	3.95917e-16		WBGene00016274	C30G12.2	2883.4	2255.31	3208.52	1769.43	2482.04	1269.98	3334.76	1897.26	2387.59	-0.619233	0.204838	0.000102528	0.00269316		WBGene00008810	cyp-13A12	125.723	39.583	35.8103	90.8511	130.691	37.8091	98.2651	51.045	76.2222	-1.37753	0.223222	3.9654e-11	1.7285e-09
WBGene00014132	ZK896.1	105.619	90.2009	101.556	116.472	30.2269	29.051	29.8742	20.2614	65.4078	1.87247	0.226745	8.99766e-18	3.98662e-16		WBGene00007778	C27D8.2	139.434	108.919	141.349	73.2545	118.255	90.2705	140.356	76.5587	111.05	-0.54247	0.17822	0.000102653	0.00269316		WBGene00011416	T04A11.1	273.884	417.94	434.349	242.3	229.528	418.489	266.285	354.966	329.718	0.661218	0.105935	4.12124e-11	1.78236e-09
WBGene00018488	acs-1	8313.21	8621.89	7519.53	8880.83	5748.02	6452.76	5283.48	5635.15	7056.86	0.517537	0.0619782	1.2612e-17	5.54745e-16		WBGene00000019	abt-1	87.8763	49.3278	109.126	40.1862	73.9295	53.5982	80.3044	57.486	68.9793	-0.681342	0.225893	0.000103577	0.00271083		WBGene00011419	T04A11.4	273.884	417.94	434.349	242.3	229.528	418.489	266.285	354.966	329.718	0.661218	0.105935	4.12124e-11	1.78236e-09
WBGene00013895	ZC434.9	694.614	588.277	589.146	758.396	1266.26	1237.49	998.438	1138.22	908.856	-0.803356	0.0971993	1.30779e-17	5.73848e-16		WBGene00021207	ptp-5.3	91.7674	64.3906	102.492	45.3927	92.8478	47.9596	83.8705	63.7922	74.0641	-0.630759	0.210205	0.000110359	0.00285633		WBGene00021556	Y45G5AM.3	464.669	320.025	303.48	473.986	502.198	302.058	479.717	359.425	400.695	-0.559936	0.0893823	4.51396e-11	1.94206e-09
WBGene00008492	F01D5.1	362.961	336.821	312.695	253.785	151.388	157.603	138.569	136.83	231.332	1.08968	0.132647	1.60209e-17	7.01291e-16		WBGene00015572	C07G1.6	65.4716	30.2965	62.468	38.1235	54.2542	32.9438	65.4282	34.5838	47.9462	-0.731764	0.246489	0.000119213	0.0030244		WBGene00008255	C51E3.10	211.099	79.3814	106.329	193.735	243.368	95.5153	190	124.081	155.439	-1.01194	0.164227	4.58935e-11	1.96938e-09
WBGene00020357	T08E11.1	58.3929	64.0617	51.187	51.5814	7.3192	2.15312	6.63649	3.52271	30.6068	3.41936	0.413735	1.71208e-17	7.45843e-16		WBGene00045053	K12C11.7	51.6179	86.8123	57.6711	111.538	65.6666	86.2186	71.2634	151.278	85.2582	0.688792	0.233366	0.000119702	0.00303179		WBGene00003702	nhr-112	134.943	60.485	47.2791	144.088	121.612	72.6747	137.506	54.2138	96.6003	-1.13785	0.184753	4.61462e-11	1.9751e-09
WBGene00015947	C18A11.1	200.329	229.253	269.688	259.06	93.8159	103.089	116.318	83.7724	169.416	1.24594	0.152576	2.10743e-17	9.15874e-16		WBGene00022326	fbxa-14	144.085	80.7755	144.564	100.069	112.746	80.8741	136.844	92.9526	111.614	-0.512395	0.17028	0.000120014	0.0030347		WBGene00008607	F09B12.3	1538.98	2399.12	2214.56	1468.29	1352.07	1795.55	1510.04	2076.99	1794.45	0.512898	0.0819544	5.29539e-11	2.2433e-09
WBGene00043983	C39D10.11	270.226	256.298	291.426	312.113	150.336	129.388	132.456	145.772	211.002	0.987325	0.120754	2.43578e-17	1.05605e-15		WBGene00015820	C16A11.7	62.6617	32.6496	58.1741	16.4888	56.4535	31.0567	61.8794	39.1417	44.8132	-0.841823	0.286864	0.000126717	0.00318324		WBGene00007533	cbl-1	845.083	1293.38	1325.63	830.916	670.101	1030.77	631.817	1175.91	975.45	0.66745	0.107971	6.04398e-11	2.54739e-09
WBGene00015933	C17H12.8	4095.49	4318.36	3862.77	4791.54	2891.48	3156.89	2942.69	2733.87	3599.14	0.530616	0.064318	2.80135e-17	1.20877e-15		WBGene00015348	C02F5.5	106.244	72.1144	111.944	45.3091	74.2327	37.6651	97.3191	60.9445	75.7216	-0.723739	0.247756	0.000132237	0.00327376		WBGene00008541	F07A5.2	286.449	161.665	174.337	260.647	301.01	129.835	419.591	127.554	232.636	-1.0429	0.170983	6.5251e-11	2.74319e-09
WBGene00003564	ncs-2	2937.25	2928.16	2611.91	2859.01	2070.34	2156.27	1877.09	1816.05	2407.01	0.506977	0.0614286	2.88989e-17	1.24402e-15		WBGene00011968	T23G11.1	252.292	161.625	188.343	111.207	149.576	103.591	217.676	129.152	164.183	-0.57804	0.196241	0.000133884	0.00329334		WBGene00019057	F58F9.3	453.44	337.941	310.515	501.387	484.364	314.401	533.657	354.659	411.295	-0.559188	0.0904123	7.33344e-11	3.05204e-09
WBGene00004395	rol-3	394.239	384.846	368.902	385.639	626.423	697.17	562.685	610.02	503.741	-0.687783	0.0843406	4.06846e-17	1.72681e-15		WBGene00013696	Y106G6A.4	225.274	165.263	194.864	113.301	148.437	95.0912	194.596	99.1641	154.499	-0.591598	0.201584	0.000135643	0.00333128		WBGene00015756	C14C6.2	450.568	315.364	269.458	421.355	433.988	300.188	460.93	298.06	368.739	-0.55589	0.0899122	7.58602e-11	3.13354e-09
WBGene00008270	C53A5.13	286.731	273.974	275.975	237.537	488.231	520.173	437.283	445.623	370.691	-0.79302	0.0974669	4.10042e-17	1.73632e-15		WBGene00077593	C49G7.12	34.7882	10.584	34.2162	10.2555	31.9194	22.4662	35.1665	9.05882	23.5569	-1.14827	0.39577	0.000138201	0.00338867		WBGene00015573	C07G1.7	47.6062	2.20099	3.12702	33.0519	19.3157	2.90268	64.7342	2.12344	21.8828	-3.78012	0.615645	8.31239e-11	3.42503e-09
WBGene00007599	C15A11.7	637.439	628.899	656.505	682.229	405.043	360.632	455.987	396.385	527.89	0.671818	0.0823499	4.16515e-17	1.75963e-15		WBGene00011203	R10E4.7	196.331	121.239	173.429	105.109	130.63	93.1748	174.161	124.698	139.846	-0.514152	0.174	0.000139885	0.00341905		WBGene00012005	jun-1	1023.03	675.704	730.996	1035.79	1355.71	840.057	1244.66	658.561	945.563	-0.653076	0.106508	8.39683e-11	3.45124e-09
WBGene00003577	ndg-4	1582.22	1391.96	1277.51	1514.27	2266.54	2325.2	2057.35	2033.97	1806.13	-0.579865	0.0709697	4.49984e-17	1.89222e-15		WBGene00012642	Y39A1A.2	19.3974	4.65327	20.4523	4.11936	17.7268	3.76634	11.5006	4.54826	10.7705	-1.68774	0.576752	0.000143104	0.00346971		WBGene00045461	C25F9.14	126.221	56.9811	41.0249	108.359	141.317	47.5887	124.431	63.7074	88.7038	-1.20284	0.198786	8.66028e-11	3.55071e-09
WBGene00018346	F42C5.4	173.977	202.292	238.2	224.205	75.3718	98.982	86.746	78.6866	147.308	1.27629	0.158117	4.57574e-17	1.91527e-15		WBGene00018563	F47D12.7	87.076	51.5715	77.71	70.1738	91.7045	44.1883	108.55	46.4924	72.1833	-0.662501	0.228871	0.000150077	0.00361643		WBGene00008548	F07A11.5	524.126	844.613	824.455	462.557	486.534	642.398	449.378	696.235	616.287	0.618125	0.100851	9.29242e-11	3.79112e-09
WBGene00017819	F26D11.2	57.1513	38.7746	60.9316	60.0806	2.75025	3.22657	2.21345	2.64336	28.4715	4.19975	0.511955	5.08642e-17	2.11926e-15		WBGene00004962	spe-8	42.2035	17.5649	34.5262	12.3806	41.9993	16.9262	32.6631	20.0502	27.2892	-0.981615	0.341532	0.000152128	0.00365859		WBGene00044469	clec-173	361.982	245.405	194.578	324.084	341.803	196.377	425.132	202.719	286.51	-0.755469	0.124229	9.57676e-11	3.89753e-09
WBGene00010899	M28.8	461.985	502.991	472.883	487.967	282.527	319.834	291.953	267.685	385.978	0.714577	0.0881191	5.67957e-17	2.36099e-15		WBGene00016800	C50C3.2	112.508	77.5124	103.688	37.1706	93.8463	62.0275	96.1324	60.2009	80.3857	-0.658048	0.227817	0.000152303	0.00365859		WBGene00044607	K02A11.4	235.011	143.102	99.3106	204.993	218.797	104.413	245.68	125.214	172.065	-0.895794	0.148254	1.05123e-10	4.25734e-09
WBGene00016763	C49A9.9	1076.49	1150.87	1092.1	1198.81	778.115	814.514	798.861	702.596	951.544	0.535808	0.0656844	5.80018e-17	2.40562e-15		WBGene00017060	D2063.1	70.7832	29.2197	67.9272	40.2165	67.4658	19.7544	47.6995	37.3462	47.5516	-0.838357	0.292759	0.000152984	0.00366922		WBGene00077757	E02H4.7	105.454	182.706	208.906	113.853	124.584	209.88	90.4392	236.654	159.059	0.89647	0.149009	1.35065e-10	5.41701e-09
WBGene00015434	C04E12.4	286.393	261.07	245.371	274.743	488.645	518.858	415.908	459.735	368.84	-0.802666	0.0993581	6.19292e-17	2.55683e-15		WBGene00017636	F20D6.6	96.5134	61.9513	103.512	36.0927	59.7219	43.2709	84.7966	47.3671	66.6532	-0.733547	0.257526	0.000164127	0.00389998		WBGene00018755	bcmo-2	251.427	168.23	185.335	310.18	319.069	175.467	296.004	173.335	234.881	-0.71428	0.118714	1.59448e-10	6.37945e-09
WBGene00010212	fbxa-192	172.598	176.449	212.044	209.043	79.7402	57.0086	89.6391	70.4858	133.376	1.33881	0.167164	7.73481e-17	3.17897e-15		WBGene00008313	C54G4.3	35.872	16.3539	33.4177	15.4656	35.3991	14.1118	42.4072	20.0362	26.6329	-0.965414	0.340205	0.000169877	0.00398731		WBGene00194926	K08D8.12	90.9833	21.349	33.9988	78.7109	95.7821	39.7575	92.952	16.6139	58.7684	-1.59838	0.269768	1.71631e-10	6.83388e-09
WBGene00284847	F54D8.10	47.2939	43.4009	89.9085	69.3309	175.145	209.043	272.246	255.057	145.178	-1.80505	0.226009	8.3201e-17	3.41181e-15		WBGene00022707	ZK354.6	37.674	18.7081	38.8212	14.4383	23.2226	14.1092	39.7444	10.9319	24.7062	-1.06536	0.377871	0.000172719	0.00404169		WBGene00021114	W09C3.7	825.586	645.638	613.345	820.532	1017.03	631.526	917.786	606.777	759.778	-0.501241	0.082534	1.73783e-10	6.90299e-09
WBGene00016453	vet-2	2330.33	2286.42	1964.64	2158.22	3202.25	2977.2	3433.71	2957.67	2663.8	-0.514149	0.0635598	1.07574e-16	4.40134e-15		WBGene00020370	T08H10.3	39.5649	27.4222	42.0732	14.9085	43.2934	11.2088	34.6348	15.4405	28.5683	-1.00075	0.3578	0.000179106	0.0041532		WBGene00004058	pmp-1	1484.19	1153.34	1165.8	1439.81	1593.82	908.528	1758.04	1054	1319.69	-0.529665	0.0879379	2.17683e-10	8.5646e-09
WBGene00009796	F46G10.1	1512.9	1634.45	1405.17	1367.59	1013.85	1082.88	992.002	983.372	1249.03	0.529221	0.0659432	1.75933e-16	7.18203e-15		WBGene00009962	F53B6.7	96.5512	64.2648	94.8726	49.4935	86.2767	54.5629	99.8249	67.3998	76.6558	-0.57103	0.20028	0.000182494	0.00421904		WBGene00013119	Y51H4A.25	156.089	86.965	87.2729	252.353	182.813	96.5025	245.182	104.467	151.456	-1.09649	0.185813	2.18789e-10	8.58773e-09
WBGene00013587	Y80D3A.9	328.845	309.757	252.638	189.003	601.794	644.637	567	538.655	429.041	-1.08833	0.13848	2.78513e-16	1.12935e-14		WBGene00011954	T23F11.2	87.4484	67.7011	103.459	43.295	63.0716	38.5779	94.5556	43.706	67.7269	-0.718626	0.257103	0.000191101	0.00439817		WBGene00001387	far-3	284.774	167.24	180.653	312.113	302.63	157.765	464.967	176.296	255.805	-0.949062	0.160894	2.38225e-10	9.30649e-09
WBGene00008296	cdr-2	862.739	886.717	800.158	851.066	507.126	624.244	544.841	548.344	703.154	0.598918	0.0756863	3.56114e-16	1.4344e-14		WBGene00016628	slc-36.5	112.304	88.4004	110.408	76.0884	158.923	86.6614	131.671	80.8996	105.67	-0.52448	0.18506	0.00019718	0.00450964		WBGene00010058	F54E4.2	43.6074	84.6752	129.308	38.5452	39.2428	100.788	17.1761	120.133	71.6844	1.55398	0.264368	2.41525e-10	9.39498e-09
WBGene00004007	pgp-13	156.705	149.608	154.383	179.731	281.41	300.553	292.998	316.938	229.041	-0.877259	0.111983	4.09795e-16	1.64334e-14		WBGene00013684	Y105E8A.27	53.402	24.507	49.5702	26.8	38.7313	21.6422	57.4445	28.225	37.5403	-0.815982	0.29244	0.000196948	0.00450964		WBGene00007453	fbxa-98	186.723	84.2064	70.9767	160.616	148.565	88.6198	154.043	83.4848	122.154	-0.937824	0.159788	3.03326e-10	1.16303e-08
WBGene00016942	C55B7.3	518.408	600.501	554.1	615.806	378.165	347.592	351.817	333.845	462.529	0.67919	0.0862781	4.20887e-16	1.68411e-14		WBGene00021463	zeel-1	135.525	161.897	122.002	238.444	164.571	260.382	140.279	188.754	176.482	0.50231	0.176489	0.000197156	0.00450964		WBGene00007733	smz-1	301.91	173.773	141.652	250.559	270.335	136.593	437.244	131.786	230.482	-1.05068	0.181627	4.34871e-10	1.65973e-08
WBGene00008229	C50F4.1	1707.68	1727.4	1473.7	1532.62	994.05	1133.02	802.744	893.513	1283.09	0.73321	0.0933718	4.42323e-16	1.76211e-14		WBGene00011919	T22C1.9	60.7566	33.8489	56.0394	35.0479	43.155	28.228	72.4643	22.7632	44.0379	-0.805578	0.289719	0.000198212	0.00452123		WBGene00015623	C09B8.4	293.528	376.162	491.765	226.701	267.346	490.118	205.592	403.815	344.378	0.786355	0.13501	4.6249e-10	1.76108e-08
WBGene00007811	C29F7.2	456.32	519.708	463.9	401.21	764.279	705.671	928.44	820.244	632.472	-0.781607	0.0998902	5.06247e-16	2.00359e-14		WBGene00010933	M162.7	76.9596	62.1467	83.1192	49.5401	75.1199	31.0232	94.4167	44.6745	64.625	-0.68891	0.247362	0.000200083	0.00455715		WBGene00003517	nac-1	711.874	582.728	463.655	708.443	701.719	466.357	736.571	457.314	603.583	-0.515353	0.0874338	4.98596e-10	1.88556e-08
WBGene00022570	sdz-35	37.2622	58.0738	49.5527	67.4214	3.67568	2.14864	1.10748	1.76327	27.6256	4.44327	0.559155	5.12978e-16	2.02582e-14		WBGene00016388	C34B2.3	45.938	15.2022	48.5287	15.4701	37.5968	27.2772	37.9765	20.0424	31.004	-0.92105	0.332686	0.000206381	0.00466602		WBGene00012231	W04A4.2	501.689	330.978	336.759	454.268	512.207	316.964	438.042	276.457	395.92	-0.57193	0.0980659	6.37189e-10	2.39329e-08
WBGene00013091	Y51B9A.9	155.018	135.735	115.365	128.544	37.5768	58.0856	38.7324	36.1235	88.1474	1.60463	0.206931	5.15124e-16	2.02988e-14		WBGene00001207	egl-43	75.2323	84.4898	54.6481	105.506	69.4713	108.818	58.2894	108.944	83.1749	0.561588	0.200605	0.000214516	0.00483574		WBGene00008850	F15B9.6	54.0193	26.3896	7.36912	71.5808	103.809	23.2649	84.6013	13.8236	48.1071	-2.03316	0.3574	6.73072e-10	2.51665e-08
WBGene00001633	gly-8	710.945	753.907	771.624	770.517	1072.63	1129.28	1130.91	1374.65	964.307	-0.631531	0.0804828	5.7157e-16	2.24743e-14		WBGene00021969	Y57G7A.6	149.275	104.402	166.263	91.8656	90.5723	76.1419	181.75	74.7702	116.88	-0.637907	0.230999	0.000219214	0.00490566		WBGene00004007	pgp-13	147.687	236.355	249.185	141.312	145.889	247.333	170.901	287.243	203.238	0.720559	0.124872	6.7789e-10	2.52896e-08
WBGene00012947	Y47H9C.1	98.8926	98.863	81.2414	123.786	25.6739	31.1873	28.7764	22.029	63.8062	1.84726	0.239218	6.5136e-16	2.55013e-14		WBGene00007305	ttbk-5	63.3727	40.9427	66.8697	35.0686	53.0714	18.8106	52.1017	24.5999	44.3547	-0.821912	0.300674	0.000218989	0.00490566		WBGene00019100	F59B1.8	529.609	363.982	338.66	550.638	562.362	377.986	510.45	413.583	455.909	-0.50693	0.086714	7.00559e-10	2.60765e-08
WBGene00013079	ttr-26	468.003	523.875	750.767	697.743	238.228	294.793	281.554	289.752	443.089	1.11233	0.144344	9.29117e-16	3.61421e-14		WBGene00009773	lipl-2	17.4483	57.3266	29.122	40.2271	22.1121	47.966	27.3744	48.2903	36.2333	0.837251	0.305811	0.000224754	0.00500779		WBGene00018730	F53A9.7	108.015	46.1789	48.4692	164.713	155.522	74.4668	184.513	70.0177	106.487	-1.28143	0.225607	7.65547e-10	2.83681e-08
WBGene00000368	ccb-1	827.359	749.301	802.741	718.576	521.523	537.189	497.745	533.699	648.516	0.555345	0.0712977	1.12857e-15	4.35279e-14		WBGene00003545	nas-27	28.4392	99.5421	57.1856	102.142	29.8407	41.3745	30.8967	79.2913	58.589	0.940128	0.348833	0.000235133	0.00520134		WBGene00008629	cpt-5	749.957	558.643	549.107	823.558	687.672	456.057	750.134	518.407	636.692	-0.510343	0.0876658	7.89713e-10	2.91982e-08
WBGene00019273	H43E16.1	324.038	375.214	295.248	346.237	172.844	178.012	113.377	144.618	243.699	1.10208	0.143756	1.29339e-15	4.97791e-14		WBGene00020659	T21G5.1	74.2991	42.1644	53.9512	25.7942	65.2046	36.672	72.3836	41.9257	51.5493	-0.713707	0.261515	0.000238423	0.00525145		WBGene00000136	amt-4	1489.16	2235.28	2187.38	1443.5	1315.89	1795.58	1662.91	2339.71	1808.68	0.512751	0.0881452	8.22643e-10	3.0348e-08
WBGene00002257	lbp-5	820.358	903.732	992.1	1102.44	558.296	533.297	627.495	579.897	764.702	0.71269	0.0924998	1.46787e-15	5.6256e-14		WBGene00011173	acs-18	120.956	103.171	141.403	62.9546	96.1147	75.2101	155.31	71.1114	103.279	-0.602172	0.219931	0.000240397	0.00528737		WBGene00008644	F10C2.3	114.314	68.1684	44.2561	128.474	209.828	67.8685	165.594	41.4771	104.997	-1.40014	0.249097	1.04434e-09	3.82709e-08
WBGene00022664	ZK121.2	235.62	231.9	271.366	274.827	438.475	398.224	476.796	438.637	345.731	-0.767471	0.0999982	1.70663e-15	6.44546e-14		WBGene00044062	snb-6	32.5205	13.8843	42.9868	13.3727	24.3988	10.3691	26.587	13.6228	22.2177	-1.07274	0.397642	0.000244254	0.00535686		WBGene00016274	C30G12.2	1956.15	1125.08	1558.09	1817.21	1772.43	1284.72	2094.05	1263.79	1608.94	-0.521601	0.0904622	1.05634e-09	3.86252e-08
WBGene00021556	Y45G5AM.3	492.33	501.085	530.667	503.774	332.333	344.52	296.036	296.161	412.113	0.660947	0.0859206	1.83266e-15	6.90706e-14		WBGene00018548	clec-79	118.28	78.5039	124.106	43.3389	83.9802	75.2188	115.622	65.6302	88.0849	-0.622879	0.229773	0.000258067	0.00562769		WBGene00010411	H25K10.1	12.4618	60.48	62.0583	30.285	16.1547	78.5061	16.0214	65.919	42.7358	1.72524	0.307476	1.13845e-09	4.15358e-08
WBGene00021082	zip-11	468.245	388.735	410.274	407.32	189.752	208.659	188.139	265.212	315.792	0.942871	0.123559	1.97467e-15	7.41153e-14		WBGene00016839	C50F2.5	53.2574	36.2716	59.3247	16.5039	39.8003	27.2742	60.928	25.5126	39.8591	-0.841953	0.314824	0.000259198	0.00563636		WBGene00021072	W07B8.4	41.2385	7.03449	13.3153	50.8589	36.9776	11.6383	52.9323	6.87484	27.6088	-2.11446	0.37749	1.24639e-09	4.5374e-08
WBGene00007642	C17E4.2	113.977	89.0459	69.0488	85.4814	201.245	223.458	217.066	200.132	149.932	-1.20585	0.158855	1.99376e-15	7.46778e-14		WBGene00019165	mpz-4	52.3478	31.5864	56.0856	18.5661	37.5914	25.394	60.0481	28.2448	38.733	-0.820157	0.305443	0.000260708	0.0056612		WBGene00020938	clec-218	147.447	299.108	325.968	165.193	228.508	319.82	170.575	322.137	247.344	0.782937	0.138602	1.33397e-09	4.82441e-08
WBGene00022548	ZC196.4	15.4166	4.85183	14.6246	14.4	70.4772	68.8859	74.1165	61.654	40.5533	-2.40676	0.316996	2.07437e-15	7.75371e-14		WBGene00002282	let-4	61.3729	78.5771	74.4884	112.503	60.7547	132.549	46.7644	91.1773	82.2733	0.642859	0.237714	0.00026119	0.00566181		WBGene00001663	gpa-1	196.256	115.476	117.352	185.314	205.327	97.2254	186.828	112.467	152.031	-0.769932	0.136405	1.38961e-09	4.98216e-08
WBGene00016424	C34H4.1	313.184	321.11	301.741	347.719	118.854	190.272	147.329	113.38	231.699	1.15417	0.152658	2.369e-15	8.78271e-14		WBGene00019586	K09F6.3	175.708	120.909	159.825	66.0728	103.801	90.2301	149.954	72.0489	117.319	-0.629859	0.2334	0.000261473	0.00566181		WBGene00014003	ZK593.3	709.93	461.113	494.024	654.618	757.988	462.488	850.893	559.493	618.818	-0.560863	0.098451	1.41791e-09	5.07264e-08
WBGene00007873	dod-21	79.179	83.4313	86.2034	79.4117	0	2.15288	1.10797	0	41.4358	6.58437	0.818945	2.59969e-15	9.61834e-14		WBGene00019388	K04F1.9	97.1608	63.8354	94.6743	70.0038	104.274	63.155	108.977	68.0593	83.7675	-0.507758	0.185348	0.00026685	0.005762		WBGene00003092	lys-3	75.7476	38.4931	12.5959	115.641	143.999	40.6903	100.948	26.5714	69.3358	-1.7778	0.320722	1.54975e-09	5.52044e-08
WBGene00000741	col-168	256.84	242.17	241.277	413.737	111.966	104.271	87.4587	111.932	196.207	1.4198	0.188717	3.26089e-15	1.19671e-13		WBGene00016753	oac-9	71.4461	52.7777	69.0916	35.093	61.8585	24.4415	66.1752	34.6478	51.9414	-0.727872	0.272249	0.000267903	0.00577662		WBGene00011894	ttr-23	59.6656	24.4553	17.8224	71.4775	111.821	29.3041	122.091	32.1439	58.5976	-1.71075	0.309393	1.66724e-09	5.91352e-08
WBGene00206354	F27E5.9	133.734	120.503	146.229	144.048	36.9982	58.9091	54.3136	37.1066	91.4802	1.50351	0.200484	3.73092e-15	1.3637e-13		WBGene00015097	B0273.1	117.883	65.7242	86.9252	43.0816	64.5922	44.2708	83.3872	44.2478	68.764	-0.695026	0.260966	0.00028067	0.00597648		WBGene00017312	pitr-5	189.133	82.4622	47.4146	147.746	236.736	76.5936	180.451	99.9695	132.563	-1.22959	0.222191	1.78493e-09	6.29054e-08
WBGene00009054	F22D6.9	533.417	559.533	606.894	560.88	781.537	806.865	839.865	846.634	691.953	-0.519103	0.0678968	3.74417e-15	1.3658e-13		WBGene00014813	M176.9	45.1401	16.4757	40.7763	20.7306	56.3203	29.0776	35.8493	16.4815	32.6064	-0.893627	0.339385	0.000294658	0.00622262		WBGene00007919	cup-16	130.418	73.6206	87.4789	193.087	179.882	79.4129	162.967	90.0248	124.612	-0.961055	0.173125	1.92951e-09	6.75694e-08
WBGene00004818	skr-12	159.488	186.488	142.962	172.531	331.687	353.014	375.745	277.899	249.977	-0.986749	0.131073	3.7927e-15	1.38073e-13		WBGene00012744	Y40H7A.4	45.245	29.1379	56.1181	35.1983	47.9545	23.7575	55.8628	19.6164	39.1113	-0.779981	0.29702	0.000296987	0.00624631		WBGene00013837	fbxa-30	31.1169	4.39953	3.14583	44.0552	40.8324	6.78038	34.454	10.6268	21.9264	-2.44428	0.440725	1.98046e-09	6.92076e-08
WBGene00019654	K11G9.3	84.7735	64.0369	82.0596	130.819	251.748	206.641	252.23	253.673	165.748	-1.38137	0.186128	6.55221e-15	2.35698e-13		WBGene00006853	unc-130	72.5406	94.7738	69.0323	101.086	50.8561	88.4062	47.6829	103.873	78.5313	0.571205	0.213776	0.000302687	0.00632451		WBGene00000051	acr-12	162.594	98.5937	72.873	159.385	140.322	73.2003	159.703	65.5759	116.531	-0.946452	0.170883	2.03749e-09	7.10506e-08
WBGene00012365	W09G3.1	485.92	481.814	497.678	485.336	714.045	664.355	701.726	737.814	596.086	-0.518521	0.0684658	6.64263e-15	2.38478e-13		WBGene00001105	dsl-3	75.235	72.4254	43.6203	130.555	52.4244	146.745	66.7734	90.9426	84.84	0.725189	0.276046	0.000311517	0.00645927		WBGene00021178	Y9C9A.8	103.837	40.6874	16.8245	90.8559	80.0155	20.3523	62.9623	22.3264	54.7326	-1.65912	0.302353	2.10435e-09	7.32278e-08
WBGene00010047	F54D1.6	2127.16	2205.61	2621.07	2748.65	1356.64	1445.38	1557.61	1698.41	1970.07	0.660506	0.0880275	7.23808e-15	2.58324e-13		WBGene00009377	F34D10.8	131.334	92.2443	142.291	56.6784	92.0407	67.7088	99.2573	63.485	93.13	-0.603904	0.228825	0.000313451	0.00648586		WBGene00021435	Y39A3A.4	23.8639	7.69872	6.29674	46.8075	43.1267	4.8439	53.9274	9.5654	24.5163	-2.41897	0.439333	2.1915e-09	7.59413e-08
WBGene00012462	Y17G7B.8	512.799	534.832	477.688	543.471	325.69	321.467	337.623	341.937	424.438	0.621202	0.0826452	7.62794e-15	2.71704e-13		WBGene00009533	F38B7.2	172.77	119.444	128.603	84.0829	187.836	136.151	199.454	102.568	141.364	-0.526407	0.197541	0.000318324	0.00656902		WBGene00006372	syx-2	220.196	133.243	142.141	218.567	266.794	152.869	240.305	125.494	187.451	-0.734056	0.132242	2.43909e-09	8.41688e-08
WBGene00020183	T03D3.5	696.126	735.016	673.512	810.747	1084.89	1067.17	1063.41	992.017	890.362	-0.519378	0.0689782	8.83415e-15	3.12829e-13		WBGene00008871	tag-314	33.0625	11.6984	34.514	14.4402	36.486	18.8105	27.3751	11.8445	23.5289	-0.976686	0.375263	0.000322487	0.00662823		WBGene00002259	lbp-7	531.156	374.247	406.978	629.024	606.969	417.831	724.32	440.286	516.351	-0.572993	0.10246	2.47438e-09	8.52093e-08
WBGene00003561	ncr-1	1271.97	1200.96	1390.19	1406.58	725.293	804.02	854.486	959.91	1076.68	0.638411	0.0853258	9.62301e-15	3.40101e-13		WBGene00019783	M70.1	86.05	41.0784	82.058	52.5202	65.1027	37.6195	66.1217	44.8312	59.4227	-0.62616	0.239704	0.000340227	0.0069742		WBGene00008590	F08H9.2	272.737	146.389	102.74	176.317	263.305	72.5365	333.274	68.9642	179.533	-1.33962	0.245514	2.52139e-09	8.64685e-08
WBGene00004000	pgp-6	370.648	410.063	333.126	330.296	649.796	795.404	564.313	624.613	509.782	-0.840733	0.113386	1.10088e-14	3.87569e-13		WBGene00017048	D2021.4	112.287	72.6849	101.793	72.8308	105.943	75.3995	144.423	81.9192	95.9101	-0.508524	0.191828	0.000340989	0.00698052		WBGene00005655	srr-4	420.024	273.587	290.641	465.123	604.57	350.814	562.602	293.946	407.664	-0.724144	0.130694	2.5727e-09	8.78644e-08
WBGene00009397	clec-66	1344.88	1356.53	1176.41	868.439	629.527	702.466	590.915	610.548	909.964	0.880226	0.118772	1.12872e-14	3.96603e-13		WBGene00016946	C55B7.10	38.557	12.8734	33.4402	12.3786	16.5822	7.52361	35.3181	14.5795	21.4066	-1.13371	0.440944	0.000341714	0.00698605		WBGene00017726	F22H10.2	533.256	222.4	314.811	569.056	711.602	436.842	762.854	303.065	481.736	-0.954207	0.174624	2.97187e-09	1.00461e-07
WBGene00007056	crn-7	246.301	222.038	195.797	224.631	393.139	439.967	353.007	390.3	308.148	-0.807259	0.10893	1.16067e-14	4.06257e-13		WBGene00007794	C28D4.7	83.6534	47.9199	102.43	43.3101	57.512	39.5089	76.8494	52.8311	63.0018	-0.655983	0.252263	0.000343026	0.00700356		WBGene00017970	F32A5.4	1272.11	922.026	868.692	1201.86	1227.18	954.184	1610.67	927.911	1123.08	-0.506127	0.0906526	3.17761e-09	1.07197e-07
WBGene00008988	F20G2.5	53.9215	77.6012	72.3087	87.6412	12.8212	16.1408	13.2767	19.3797	44.1364	2.15883	0.294762	1.60821e-14	5.5647e-13		WBGene00013939	ZK218.5	2.76537	32.6384	16.1575	16.4873	2.21416	32.0002	8.84098	26.3954	17.1874	1.49672	0.586835	0.000345979	0.00703652		WBGene00043980	F11D5.7	50.9195	107.751	140.13	59.649	44.5811	106.648	60.5344	115.921	85.7668	1.06884	0.196949	3.48044e-09	1.17175e-07
WBGene00014136	ZK896.5	473.98	462.194	483.855	544.646	287.992	318.783	291.981	320.698	398.016	0.666465	0.0900928	1.6996e-14	5.85861e-13		WBGene00021525	Y41D4B.26	12.0034	15.1286	5.38288	35.018	8.86222	42.3683	6.19188	15.4657	17.5526	1.40707	0.548708	0.000346013	0.00703652		WBGene00003999	pgp-5	268.121	132.849	156.012	243.544	207.13	121.403	222.523	118.214	183.724	-0.78654	0.143895	3.52528e-09	1.18444e-07
WBGene00019418	fbxb-54	143.807	136.594	134.856	125.071	278.047	244.03	332.11	247.654	205.271	-0.992178	0.135393	1.77898e-14	6.09753e-13		WBGene00018433	ceh-82	46.0655	86.3051	62.4877	99.9684	65.3044	95.0488	59.2237	86.4808	75.1105	0.544415	0.207162	0.000348728	0.0070693		WBGene00013091	Y51B9A.9	146.41	68.1789	52.5765	128.483	109.252	63.9643	122.49	56.3475	93.4628	-1.00732	0.186154	4.00645e-09	1.33259e-07
WBGene00138721	pals-37	32.9133	58.9522	52.5768	45.3722	5.52945	3.2541	3.34288	4.38351	25.7906	3.38867	0.459264	1.92748e-14	6.59409e-13		WBGene00023490	F36A2.14	88.2441	53.7671	69.0068	54.6541	77.4183	47.0339	83.9143	39.1686	64.1509	-0.588177	0.22698	0.00036758	0.0073775		WBGene00009984	F53F1.6	146.169	69.2305	76.0028	175.151	183.91	93.8913	235.035	104.068	135.432	-1.04177	0.192878	4.08342e-09	1.35275e-07
WBGene00011475	T05D4.2	142.855	165.747	92.6154	129.789	373.168	286.071	419.465	287.254	237.12	-1.32116	0.181506	1.9975e-14	6.82079e-13		WBGene00016612	C43G2.3	82.3312	34.2679	62.3222	37.3923	42.372	39.7101	73.7422	25.8849	49.7528	-0.754645	0.296242	0.000375876	0.00750573		WBGene00010256	hrg-3	59.7584	181.611	200.522	57.0053	104.818	142.098	83.8885	189.932	127.454	1.14816	0.213029	4.26891e-09	1.40857e-07
WBGene00021519	Y41D4B.17	57.2012	78.5553	54.4339	69.6511	11.9091	10.7589	8.85196	16.7383	38.5125	2.32508	0.318618	2.15761e-14	7.35369e-13		WBGene00008355	fbxa-141	35.8403	79.5008	53.9162	67.0328	29.8588	55.4974	25.614	70.1439	52.1755	0.738001	0.290572	0.000382794	0.00760346		WBGene00007460	C08F11.13	613.225	284.981	302.553	596.82	800.148	504.312	794.957	355.872	531.608	-0.898445	0.16644	4.65071e-09	1.5315e-07
WBGene00022413	Y102A11A.3	2927.47	2904.2	2674.1	3338.73	2136.56	2230.17	1938.08	1981.63	2516.37	0.501895	0.0676487	2.21053e-14	7.51993e-13		WBGene00001564	icl-1	6358.45	3953.12	6100.02	4163.9	8488.54	5851.78	8441.67	4795.06	6019.07	-0.525052	0.204821	0.000390369	0.00773392		WBGene00010510	ent-3	63.4087	29.6848	28.4694	77.0829	74.5301	29.0903	73.0333	23.3998	49.8374	-1.3002	0.242346	4.85709e-09	1.59629e-07
WBGene00008372	D1054.5	263.783	269.488	253.476	294.388	147.593	150.575	150.513	148.027	209.731	0.828858	0.113231	2.30915e-14	7.82613e-13		WBGene00016416	C34F11.5	122.715	90.3272	96.0877	52.6423	93.8853	73.3216	138.518	54.7102	90.2758	-0.60625	0.238027	0.000401175	0.00791741		WBGene00021337	Y34F4.2	150.047	50.4671	79.0403	158.35	119.203	77.1909	195.426	65.6398	111.92	-1.11528	0.208208	4.96292e-09	1.62784e-07
WBGene00019700	btb-11	120.671	122.018	77.987	96.2547	244.234	227.842	245.802	215.957	168.846	-1.13074	0.155481	2.35154e-14	7.94017e-13		WBGene00007448	C08F8.6	64.298	42.1081	58.2392	28.8792	44.2278	22.5732	67.9994	31.8878	45.0266	-0.742987	0.29526	0.000408999	0.00804086		WBGene00008220	C50B6.7	253.621	413.393	426.98	262.45	242.047	324.832	232.832	382.898	317.382	0.609216	0.111654	5.09784e-09	1.6655e-07
WBGene00284854	Y95D11A.5	322.15	260.848	237.188	278.761	537.31	656.596	653.949	432.326	422.391	-1.02019	0.140325	2.56965e-14	8.62853e-13		WBGene00011378	T02E1.6	92.0537	46.6891	50.6514	38.1405	59.7527	41.4009	95.4402	35.5109	57.4549	-0.72171	0.286739	0.000412628	0.00810183		WBGene00044692	fbxb-91	90.2969	160.564	130.239	80.7638	66.9737	209.29	63.0467	153.067	119.28	1.05525	0.196842	5.16046e-09	1.68264e-07
WBGene00009943	F52G2.3	478.137	450.361	453.37	469.048	309.249	305.737	263.251	292.388	377.693	0.639762	0.0870414	2.615e-14	8.76458e-13		WBGene00001246	elo-8	45.5163	19.3061	45.9905	14.3525	30.5144	22.1028	43.3294	23.771	30.6104	-0.844548	0.337903	0.000417601	0.00815781		WBGene00021977	Y58A7A.3	2118.95	514.515	649.891	2313.36	3798.45	1193.8	3329.97	680.784	1824.97	-1.80569	0.340691	5.31308e-09	1.7256e-07
WBGene00009877	F49C12.7	275.641	316.067	314.404	275.137	645.933	451.437	609.593	506.72	424.366	-0.875482	0.120109	2.76928e-14	9.26459e-13		WBGene00003099	lys-10	28.5985	10.4826	20.461	13.3935	37.6517	13.1787	35.3716	13.6494	21.5984	-1.01472	0.407135	0.000429054	0.00831813		WBGene00018966	F56D2.5	167.29	100.056	95.8534	215.656	258.296	120.216	219.361	126.551	162.91	-0.906776	0.169447	6.08037e-09	1.94431e-07
WBGene00019863	R04A9.3	76.9278	101.779	78.8046	62.4876	177.862	194.663	193.681	177.108	132.914	-1.16634	0.160883	3.02664e-14	1.00904e-12		WBGene00017154	ugt-57	9.16661	25.7838	15.1099	35.0862	15.4687	56.4114	15.0032	22.7899	24.3524	1.09631	0.442999	0.000430625	0.00832854		WBGene00005649	srp-8	84.0755	39.5906	28.3637	97.2831	108.534	41.6657	98.5613	51.0237	68.6372	-1.20087	0.225557	6.07293e-09	1.94431e-07
WBGene00043302	F32D8.11	98.0794	89.443	156.692	69.0627	278.942	288.234	344.819	271.794	199.633	-1.45175	0.200591	3.02722e-14	1.00904e-12		WBGene00013318	Y57G11C.23	49.5298	43.3381	62.5847	20.6357	41.9953	20.6865	60.0243	20.0517	39.8558	-0.844733	0.342242	0.000435773	0.00838494		WBGene00010150	F56D5.6	711.727	553.149	602.919	851.686	949.126	529.951	758.245	553.472	688.784	-0.522921	0.0960683	6.77676e-09	2.16282e-07
WBGene00004816	skr-10	309.03	362.279	239.625	275.15	588.945	611.523	662.824	483.504	441.61	-0.952888	0.131449	3.24223e-14	1.07675e-12		WBGene00015689	spch-2	105.308	94.2234	119.482	48.4019	99.711	48.9633	137.126	79.1388	91.5443	-0.625578	0.252174	0.000467081	0.00894259		WBGene00007857	C31H5.6	986.164	715.279	667.017	843.632	984.072	553.415	1026.58	711.945	811.014	-0.511531	0.0940145	7.01664e-09	2.23507e-07
WBGene00021072	W07B8.4	44.7093	55.0168	39.9824	56.8792	3.4718	2.03549	4.19019	9.67608	26.9951	3.27649	0.451563	3.29068e-14	1.08886e-12		WBGene00017501	pud-3	551.828	1336.15	714.137	1554.15	482.222	633.987	584.317	1208.97	883.219	0.817811	0.335345	0.000473311	0.00902165		WBGene00019430	K06A5.2	371.577	250.742	178.567	339.574	360.259	120.15	584.564	163.698	296.142	-1.14217	0.2164	7.25994e-09	2.30813e-07
WBGene00008953	F19C6.4	198.987	216.125	224.557	206.389	375.977	334.078	376.801	344.114	284.629	-0.731826	0.100362	3.39438e-14	1.12113e-12		WBGene00001476	fmo-1	526.683	332.579	372.221	250.017	697.112	376.663	604.655	318.15	434.76	-0.63023	0.255288	0.0004742	0.00902271		WBGene00020073	sdz-28	216.986	391.49	359.485	205.575	139.284	638.625	210.732	330.622	311.6	1.09094	0.20636	7.33401e-09	2.32721e-07
WBGene00001904	his-30	858.574	965.037	663.601	798.547	1304.83	1335.7	1453.79	1288.12	1083.53	-0.692196	0.0951099	3.81771e-14	1.25639e-12		WBGene00022816	fbn-1	346.784	537.087	316.268	999.471	474.291	1015.4	297.816	497.034	560.519	0.870029	0.358485	0.000477119	0.00904392		WBGene00009110	F25D1.5	235.502	113.283	125.902	220.272	197.946	116.248	169.866	104.152	160.396	-0.79508	0.149443	8.01895e-09	2.53969e-07
WBGene00001907	his-33	858.574	965.037	663.601	798.547	1304.83	1335.7	1453.79	1288.12	1083.53	-0.692196	0.0951099	3.81771e-14	1.25639e-12		WBGene00012012	T25B9.6	49.2563	36.1543	67.6616	35.9413	43.9793	15.5693	66.7442	25.3997	42.5882	-0.816796	0.334814	0.00047801	0.00904392		WBGene00002257	lbp-5	780.336	608.676	606.407	861.558	946.236	633.358	1058.03	672.715	770.914	-0.505962	0.0933721	8.12384e-09	2.568e-07
WBGene00000139	amx-3	106.73	92.1454	84.4952	81.6453	206.076	239.949	180.348	186.754	147.268	-1.11792	0.155144	4.04072e-14	1.32498e-12		WBGene00000469	ces-2	21.1543	49.0638	25.8722	130.944	44.2481	65.8547	22.0868	36.43	49.4567	1.05553	0.438147	0.00047823	0.00904392		WBGene00018334	cyp-33E2	300.256	202.316	193.757	328.534	287.549	199.702	285.723	195.666	249.188	-0.5728	0.106337	8.18503e-09	2.58241e-07
WBGene00006675	twk-22	365.665	373.197	364.63	365.638	528.34	527.784	563.302	562.478	456.379	-0.555662	0.0759387	4.08423e-14	1.33443e-12		WBGene00019041	fbxc-22	50.5062	85.4082	40.987	80.455	56.3851	97.8123	50.3329	64.6915	65.8223	0.585712	0.234929	0.000478256	0.00904392		WBGene00021879	clec-83	424.1	308.152	306.362	431.427	391.578	259.051	433.494	279.765	354.241	-0.517199	0.0956646	8.63479e-09	2.71914e-07
WBGene00219410	C04C3.14	84.1487	75.552	81.998	80.0577	26.05	16.122	27.5754	18.368	51.234	1.80622	0.251877	4.7328e-14	1.54079e-12		WBGene00018134	F37A4.4	146.459	111.492	124.178	83.6182	104.914	81.7748	173.784	68.3963	111.827	-0.550338	0.220867	0.000483145	0.00912515		WBGene00004816	skr-10	293.003	494.048	465.467	344.255	227.808	695.852	263.211	445.998	403.705	0.847612	0.160275	8.88626e-09	2.78773e-07
WBGene00021256	Y22D7AR.2	185.396	238.011	192.572	154.57	79.4897	89.4116	72.9732	82.7562	136.897	1.20858	0.168313	4.90949e-14	1.59545e-12		WBGene00011191	R10D12.10	21.1009	5.8552	30.2109	7.22207	32.0516	15.0454	32.6626	15.4935	19.9553	-1.10371	0.452866	0.000492734	0.00928344		WBGene00022754	nspd-1	423.651	282.774	218.211	360.332	397.939	175.253	637.762	161.214	332.142	-1.05095	0.200218	8.97936e-09	2.80631e-07
WBGene00018607	F48E3.8	530.838	540.703	521.169	420.695	223.753	258.626	322.814	274.981	386.698	0.873344	0.121363	5.4126e-14	1.75581e-12		WBGene00016546	C40A11.3	23.0469	43.126	31.2371	42.2481	24.3566	67.7666	19.4499	41.8678	36.6374	0.801343	0.329956	0.00050576	0.00948238		WBGene00001208	egl-44	387.044	250.874	231.342	340.023	460.135	284.565	430.372	240.939	328.162	-0.645937	0.121124	9.44019e-09	2.94477e-07
WBGene00021875	Y54G2A.10	295.176	297.988	292.523	325.661	173.237	190.186	150.676	167.962	236.676	0.800291	0.111476	6.83326e-14	2.19704e-12		WBGene00022650	ZK84.2	61.7719	32.6327	62.472	31.9428	37.6434	36.7076	79.5704	24.5739	45.9143	-0.758065	0.312256	0.000510595	0.00956138		WBGene00016379	C33H5.13	276.925	191.441	181.025	326.765	334.147	199.762	401.634	225.892	267.199	-0.702298	0.133375	1.18489e-08	3.66851e-07
WBGene00021898	Y54G2A.36	427.376	498.79	414.651	338.296	208.968	214.254	241.3	232.329	321.996	0.879093	0.12324	8.74074e-14	2.79059e-12		WBGene00011671	cyp-13A4	47.7051	22.2503	51.7905	18.5712	37.5774	30.0907	39.7245	16.405	33.0143	-0.810948	0.334783	0.000513259	0.00958773		WBGene00010706	cyp-14A2	96.6102	168.234	220.013	89.0172	109.193	158.007	74.3148	176.516	136.488	0.903459	0.172771	1.2119e-08	3.73814e-07
WBGene00005712	srv-1	555.967	585.408	554.065	610.54	403.465	400.05	363.03	351.587	478.014	0.5853	0.0814615	9.91213e-14	3.14247e-12		WBGene00019151	pck-3	75.16	50.3996	84.1859	29.9271	61.8728	47.9489	71.4841	43.7576	58.092	-0.614993	0.252377	0.00053532	0.00993962		WBGene00019902	R05G6.10	313.055	188.606	186.6	294.863	411.235	232.895	387.3	214.016	278.571	-0.730434	0.139026	1.24386e-08	3.8296e-07
WBGene00077525	C41G7.8	120.358	159.917	151.95	152.733	64.8288	61.0466	37.7047	54.7845	100.415	1.36674	0.19423	1.3353e-13	4.19673e-12		WBGene00018004	F33D11.7	44.1223	22.208	46.3638	25.7802	37.6032	15.9915	32.6825	11.8416	29.5742	-0.870572	0.364625	0.000540649	0.00998762		WBGene00003995	pgp-1	1271.97	674.986	749.656	1341.55	1053.48	947.624	1230.51	867.045	1017.1	-0.563778	0.106276	1.28948e-08	3.95915e-07
WBGene00012231	W04A4.2	531.406	480.106	541.093	459.88	772.149	751.027	753.491	695.934	623.136	-0.543952	0.0761335	1.51758e-13	4.75317e-12		WBGene00017975	F32B5.1	195.533	121.715	158.573	64.9883	86.2264	74.2953	165.111	81.0994	118.443	-0.661817	0.277112	0.000568446	0.0104163		WBGene00008101	C44H9.6	393.762	261.244	239.328	372.69	341.921	241.528	339.501	240.448	303.803	-0.530991	0.0997614	1.29071e-08	3.95915e-07
WBGene00013220	ctl-3	953.14	1169.94	1114.7	948.335	684.009	723.157	721.341	660.647	871.909	0.573119	0.0804185	1.59511e-13	4.97957e-12		WBGene00044256	Y45F10C.6	27.9476	44.955	27.9864	45.2808	28.807	70.6774	25.6924	46.3498	39.712	0.727826	0.303809	0.000568356	0.0104163		WBGene00019298	K02D7.1	2116.58	1492.3	1481.68	1889.7	2807.51	1732.83	2570.65	1503.28	1949.32	-0.564206	0.106833	1.4446e-08	4.41482e-07
WBGene00007693	C23H4.4	10.0955	16.0689	8.4094	17.4554	72.7355	61.3397	91.7628	53.5709	41.4298	-2.32803	0.332593	1.59535e-13	4.97957e-12		WBGene00019015	F57F4.1	75.2462	57.3684	96.0199	51.5832	76.2667	35.7343	69.7441	46.4777	63.5551	-0.586098	0.24399	0.000584738	0.0106484		WBGene00013699	Y106G6D.2	148.262	245.294	249.305	167.967	110.229	383.497	154.079	273.064	216.462	0.933297	0.180651	1.56228e-08	4.74817e-07
WBGene00008486	ugt-44	4204.76	4494.98	3676.47	4716.86	2528.73	3216.24	2597.33	2916.17	3543.94	0.585007	0.0823175	1.75361e-13	5.44547e-12		WBGene00015634	C09D4.3	80.7403	38.6413	69.0515	31.9828	46.4209	45.1369	75.9205	38.2773	53.2714	-0.656386	0.274397	0.00058942	0.0107113		WBGene00021262	fbxa-74	352.303	233.169	259.108	404.018	429.567	265.442	349.014	259.791	319.052	-0.565138	0.107554	1.74341e-08	5.26968e-07
WBGene00008301	pals-39	27.4898	63.025	58.4953	50.4508	7.33108	2.15146	1.1066	3.52413	26.6968	3.63721	0.515059	1.98804e-13	6.15241e-12		WBGene00001065	dpy-3	6.44039	25.6919	10.7788	47.4243	14.3823	60.2137	5.30137	6.37466	22.0759	1.51622	0.667444	0.000628239	0.011323		WBGene00012783	Y43C5A.3	173.011	95.7135	130.669	210.205	253.086	127.784	244.32	114.715	168.688	-0.854094	0.165565	1.79314e-08	5.4003e-07
WBGene00010646	K08C7.1	374.202	421.988	368.858	390.145	652.891	535.905	609.603	606.918	495.064	-0.612646	0.0866548	2.14668e-13	6.63206e-12		WBGene00012689	Y39B6A.30	78.7015	55.1726	83.1526	53.6843	73.9854	57.3336	91.7365	36.4806	66.2809	-0.556709	0.233822	0.000638161	0.011475		WBGene00000391	cdd-1	246.844	159.485	167.749	229.456	248.097	123.98	303.257	147.709	203.322	-0.731912	0.141883	2.01347e-08	6.03093e-07
WBGene00006627	tsp-1	226.969	277.857	375.306	344.228	14.6967	38.6827	58.6893	48.4849	173.114	2.82385	0.408197	2.15522e-13	6.64715e-12		WBGene00009708	F44G3.7	59.5574	31.6569	64.7662	29.9298	45.2943	31.0238	47.6509	29.1745	42.3817	-0.659429	0.282741	0.000674038	0.0120496		WBGene00004989	spp-4	453.495	613.297	704.622	477.216	415.042	575.321	360.57	627.816	528.422	0.531704	0.101514	2.07324e-08	6.19875e-07
WBGene00044697	poml-4	94.4776	86.2532	84.4904	99.7645	24.7613	33.3354	27.671	33.4855	60.5299	1.55034	0.222857	2.18999e-13	6.73153e-12		WBGene00001839	hdl-1	64.1066	41.0566	79.8923	26.837	41.9727	40.4211	81.1703	36.4732	51.4912	-0.699048	0.302144	0.000682685	0.0121336		WBGene00018314	F41H10.1	299.467	200.22	129.695	264.359	273.846	107.466	449.173	88.1685	226.549	-1.20743	0.238339	2.16961e-08	6.47521e-07
WBGene00016335	gba-1	982.24	1069.57	915.107	1155.96	726.463	692.289	604.635	661.845	851.014	0.597735	0.0845412	2.20261e-13	6.75888e-12		WBGene00016322	C32E8.4	118.783	68.6244	92.7759	80.9925	89.4937	70.0254	129.097	56.9319	88.3405	-0.512268	0.216474	0.000692306	0.0122467		WBGene00004096	pqm-1	883.744	384.909	399.423	942.553	1370.49	616.495	1143.74	457.543	774.863	-1.14403	0.226202	2.3954e-08	7.09792e-07
WBGene00001104	dsl-2	398.46	334.207	270.524	335.543	627.708	594.47	718.478	531.45	476.355	-0.857909	0.122758	2.32364e-13	7.10627e-12		WBGene00008259	C52E4.7	38.6281	26.8693	51.7451	17.5281	38.7166	26.3417	43.2896	17.3044	32.5528	-0.762089	0.334474	0.000724934	0.0126649		WBGene00004814	skr-8	333.415	480.832	462.459	324.972	220.827	728.791	288.531	495.926	416.969	0.841116	0.165258	2.55167e-08	7.53404e-07
WBGene00020258	T05E7.1	211.248	236.662	133.242	128.476	489.108	476.66	399.425	377.917	306.592	-1.24936	0.180584	2.88908e-13	8.80587e-12		WBGene00014240	htas-1	111.425	67.1293	106.404	59.6604	69.8473	49.9593	87.7806	58.1303	76.292	-0.54165	0.231522	0.000730385	0.0127457		WBGene00007694	C23H4.6	391.365	290.813	279.97	496.472	458.416	344.676	483.512	298.437	380.458	-0.558985	0.107884	2.58168e-08	7.60907e-07
WBGene00022845	ZK1055.4	46.1755	48.4766	47.121	38.443	4.58253	7.52962	4.42656	7.92955	25.5855	2.76862	0.397698	3.00163e-13	9.13361e-12		WBGene00012686	Y39B6A.27	64.2388	53.8527	77.6772	42.2975	66.3204	34.7944	87.4026	47.3882	59.2465	-0.580419	0.251411	0.000741903	0.0129027		WBGene00018746	fbxb-103	102.781	157.256	151.354	91.7749	77.724	184.124	92.7736	160.526	127.289	0.796046	0.156884	2.92705e-08	8.56601e-07
WBGene00010041	F54C9.3	1596.04	1869.86	2208.23	2127.86	1053.18	1089.82	1358.99	1219.55	1565.44	0.703042	0.100469	3.03503e-13	9.21268e-12		WBGene00013801	Y116A8C.24	31.0643	16.3366	30.0986	12.7179	17.6143	11.2403	44.8454	10.8957	21.8516	-1.00594	0.448216	0.000751548	0.0130328		WBGene00195176	Y43F8B.24	94.2628	61.6101	58.5261	134.937	151.253	52.2732	119.889	62.6665	91.9272	-1.02685	0.203843	2.98466e-08	8.7192e-07
WBGene00020486	T13C5.6	390.302	455.59	442.631	416.866	254.715	284.128	250.549	210.091	338.109	0.751179	0.107726	3.2196e-13	9.74789e-12		WBGene00020070	rmd-6	128.998	114.284	148.672	84.5069	106.262	81.8754	147.623	63.7207	109.493	-0.502583	0.216572	0.000764095	0.0131991		WBGene00018647	F49F1.7	63.8604	24.7761	25.272	70.579	63.8892	20.0683	50.0934	22.9751	42.6892	-1.32929	0.267195	3.70152e-08	1.07377e-06
WBGene00206388	K10C2.14	179.888	179.533	211.976	158.288	91.3652	84.7024	77.6035	60.0259	130.423	1.18185	0.170921	3.29338e-13	9.93812e-12		WBGene00015089	B0252.5	80.0705	43.1958	67.8992	35.0499	56.4291	46.1039	64.5065	36.4234	53.7098	-0.586519	0.25532	0.00076651	0.013226		WBGene00016788	C49G7.10	533.067	149.958	142.07	598.596	1019.08	313.651	1072.28	147.036	496.968	-1.94878	0.397526	4.19413e-08	1.2082e-06
WBGene00050914	T12B5.15	576.015	509.685	535.414	579.622	845.85	762.963	750.619	796.811	669.622	-0.510204	0.0724836	3.52695e-13	1.06253e-11		WBGene00044005	F37C12.18	54.3875	17.4845	37.7007	24.7309	30.9987	22.5886	41.5514	16.3833	30.7282	-0.797953	0.356381	0.000794354	0.0135996		WBGene00007717	C25D7.5	87.2065	43.9879	34.684	105.541	93.1165	52.3295	87.0504	31.8924	66.9761	-1.11316	0.224986	4.60458e-08	1.31501e-06
WBGene00006886	vap-1	434.975	427.167	396.186	450.773	285.182	278.947	245.889	265.437	348.07	0.643374	0.092451	4.38891e-13	1.31566e-11		WBGene00018547	clec-78	30.1762	70.4858	45.3681	209.617	65.1337	180.434	28.2198	72.0644	87.6873	1.28056	0.596185	0.000820398	0.0139831		WBGene00020972	trpl-2	153.868	90.1512	62.2354	140.399	189.746	75.6405	139.157	89.3504	117.568	-0.91557	0.184795	4.90354e-08	1.39557e-06
WBGene00021939	Y55F3BR.2	281.677	223.388	265.843	231.508	445.088	410.834	388.693	420.458	333.436	-0.708582	0.102322	4.94437e-13	1.47973e-11		WBGene00009926	noah-2	366.389	537.161	397.277	945.446	478.298	934.417	391.757	507.864	569.826	0.654741	0.294178	0.00083583	0.014152		WBGene00007392	fbxa-156	367.761	297.131	294.671	404.793	443.754	250.352	431.076	286.103	346.955	-0.519013	0.102316	5.0813e-08	1.44121e-06
WBGene00007694	C23H4.6	414.895	525.152	484.674	508.044	309.231	300.115	290.127	306.5	392.342	0.658938	0.0950727	5.28634e-13	1.57429e-11		WBGene00007479	C09F9.2	143.645	244.219	152.278	488.347	217.523	536.659	111.135	218.896	264.088	0.966315	0.448828	0.000860825	0.0144908		WBGene00007642	C17E4.2	107.843	171.591	157.184	84.4415	65.5084	240.188	81.6036	150.885	132.406	1.01974	0.207123	5.14783e-08	1.45758e-06
WBGene00009433	F35E12.9	614.152	659.127	793.227	626.782	313.2	413.118	402.404	420.112	530.265	0.775233	0.112424	5.42332e-13	1.61244e-11		WBGene00014029	ZK637.12	94.4894	67.773	95.2102	50.3696	74.2985	70.1684	110.914	48.3742	76.4496	-0.525151	0.234884	0.000914615	0.0151788		WBGene00013700	Y106G6D.3	164.191	96.7558	67.4324	132.145	145.271	50.4158	239.848	67.0006	120.382	-1.18602	0.242303	5.24789e-08	1.48085e-06
WBGene00017478	F15A8.6	398.192	382.643	470.935	492.68	253.951	256.854	272.996	238.238	345.811	0.748036	0.108481	5.56113e-13	1.65037e-11		WBGene00015994	C18H7.4	57.838	39.7888	55.0137	16.5046	43.1143	34.797	60.9245	20.9579	41.1173	-0.743165	0.343273	0.000921865	0.0152395		WBGene00016809	C50D2.6	615.842	402.206	367.174	771.81	517.185	406.889	679.676	461.738	527.815	-0.617654	0.123265	5.34165e-08	1.50219e-06
WBGene00013837	fbxa-30	32.8986	46.4742	43.0548	36.1043	0.91844	1.07458	3.32192	1.76304	20.7012	4.3483	0.618901	5.56906e-13	1.65037e-11		WBGene00018253	F40H6.1	61.0338	30.2144	45.1932	26.7665	39.893	31.0775	66.3842	29.1013	41.208	-0.670905	0.306037	0.000924512	0.0152659		WBGene00018874	tag-234	389.284	225.054	276.782	407.901	528.561	318.854	443.039	270.116	357.449	-0.655886	0.131536	5.78064e-08	1.61196e-06
WBGene00003585	ndx-8	33.9445	29.0233	30.8679	26.5031	109.431	95.5814	109.663	72.307	63.4152	-1.61486	0.23686	5.65999e-13	1.67458e-11		WBGene00020372	T09A12.1	17.4568	11.6938	34.509	15.47	29.8565	7.52477	28.2617	10.0212	19.3492	-0.998508	0.465519	0.000927483	0.0152659		WBGene00023503	F17C11.13	101.29	34.0157	51.8821	106.48	105.245	54.238	94.0786	52.1067	74.9171	-1.00787	0.205523	6.0806e-08	1.69276e-06
WBGene00015112	B0281.5	372.73	398.917	296.544	335.499	683.276	542.489	656.52	556.197	480.272	-0.771723	0.112266	6.09809e-13	1.80127e-11		WBGene00013988	ZK512.10	38.1531	18.4541	35.5047	11.3171	24.4011	20.7358	40.7634	14.5375	25.4834	-0.845264	0.392719	0.000953633	0.015597		WBGene00022265	Y73C8C.8	204.838	311.124	320.779	216.561	181.266	383.077	218.915	282.958	264.94	0.625193	0.125678	6.45997e-08	1.79234e-06
WBGene00009642	F42G4.5	488.418	467.843	458.257	493.148	314.797	333.22	317.726	304.923	397.292	0.568461	0.0819787	6.25164e-13	1.84363e-11		WBGene00015987	C18G1.9	47.7855	38.5825	52.8385	26.8134	43.1288	15.9907	62.7094	27.329	39.3972	-0.723004	0.337676	0.000977294	0.0158826		WBGene00008476	E03H4.8	249.32	156.139	142.118	240.438	242.22	168.671	219.507	130.793	193.651	-0.630242	0.126704	6.51726e-08	1.80522e-06
WBGene00015713	C12D12.1	377.161	360.613	313.925	421.199	215.119	215.188	198.875	212.758	289.355	0.773953	0.11268	6.37884e-13	1.87202e-11		WBGene00021435	Y39A3A.4	30.3532	9.34507	36.6517	20.6208	28.7617	18.8158	37.9898	12.7503	24.4111	-0.851722	0.399607	0.00100019	0.0161862		WBGene00017764	F25A2.1	51.8603	19.798	11.5341	53.2335	46.2267	15.4978	41.3476	13.8148	31.6641	-1.55253	0.319863	6.80324e-08	1.87502e-06
WBGene00017048	D2021.4	47.9674	47.3394	35.641	37.8768	113.909	103.182	107.785	146.466	80.0209	-1.43189	0.2107	6.71812e-13	1.96841e-11		WBGene00011120	R07E5.15	137.153	84.0443	127.169	78.3437	86.3079	73.3919	103.392	54.6328	93.0544	-0.50617	0.229862	0.00100184	0.0161959		WBGene00021996	Y59E9AL.6	200.021	139.709	122.423	201.019	247.567	86.1731	378.753	109.421	185.636	-1.08464	0.223501	6.85892e-08	1.88723e-06
WBGene00003878	pept-3	266.77	244.671	207.19	265.004	384.999	405.951	411.409	436.768	327.845	-0.719808	0.104867	6.9962e-13	2.0433e-11		WBGene00011401	T03F6.6	112.575	76.1467	118.441	43.8614	76.5886	50.8827	97.3449	74.8063	81.3308	-0.557091	0.256348	0.00101529	0.0163788		WBGene00009884	F49C12.15	612.373	480.437	361.839	556.089	605.32	324.872	869.075	304.221	514.278	-0.788772	0.161236	7.32087e-08	2.00435e-06
WBGene00008127	ddo-1	87.2185	63.3201	108.596	101.079	206.988	190.133	201.08	207.194	145.701	-1.11695	0.164402	7.8819e-13	2.29827e-11		WBGene00000771	cpb-2	63.2607	38.6691	53.9605	33.0208	70.7182	42.3099	62.664	37.3736	50.2471	-0.559727	0.257676	0.0010339	0.0166094		WBGene00006449	alg-4	235.695	133.181	94.3623	176.35	174.722	83.3816	330.668	87.7246	164.511	-1.11482	0.231118	7.73972e-08	2.11204e-06
WBGene00019660	K11H12.4	747.644	757.227	770.185	562.206	361.087	476.528	316.495	340.967	541.543	0.893753	0.131486	8.77575e-13	2.54688e-11		WBGene00007156	B0379.2	49.772	29.1451	57.0923	22.6707	36.5316	33.8815	57.4635	23.6656	38.7778	-0.672707	0.318952	0.00109409	0.017485		WBGene00014135	ZK896.4	202.554	144.046	122.089	220.25	213.792	126.013	195.549	130.788	169.385	-0.632528	0.12856	8.51994e-08	2.31351e-06
WBGene00194713	F19B10.13	109.139	100.183	296.109	188.151	11.1324	2.14069	9.98328	15.0155	91.4818	4.00119	0.59436	9.09922e-13	2.63631e-11		WBGene00004909	snf-10	37.5771	28.1321	34.5388	16.5118	40.8792	7.52129	34.4174	15.4978	26.8844	-0.864541	0.423426	0.00113151	0.0179894		WBGene00013956	ZK265.3	229.395	159.461	114.51	193.648	265.556	75.5804	372.452	100.985	188.949	-1.14853	0.239221	8.54148e-08	2.31557e-06
WBGene00019473	cyp-35A5	37.4266	59.1808	38.9984	25.2064	127.264	110.847	134.97	118.913	81.6008	-1.53754	0.227648	9.25886e-13	2.67829e-11		WBGene00019949	R08C7.5	58.7286	21.0742	55.0227	14.4433	22.1063	23.5094	44.1418	24.6059	32.954	-0.8347	0.408515	0.00116399	0.0183541		WBGene00019182	H10E21.1	240.213	162.775	155.132	225.039	253.862	166.999	262.324	153.651	202.499	-0.581749	0.117806	8.65655e-08	2.3353e-06
WBGene00000740	col-167	495.897	367.842	512.931	654.004	223.614	282.336	174.724	200.73	364.01	1.15794	0.171559	9.91435e-13	2.85565e-11		WBGene00002090	ins-7	69.1386	31.1356	70.2136	25.4662	63.5968	58.3867	69.477	37.7383	53.1441	-0.625178	0.300303	0.00118634	0.0185921		WBGene00012207	W02B12.12	205.445	123.157	100.172	160.899	187.202	91.3991	286.281	66.4923	152.631	-1.05704	0.220176	9.03817e-08	2.43033e-06
WBGene00021161	Y4C6B.7	274.135	260.909	247.743	263.489	447.288	483.975	368.197	430.991	347.091	-0.704528	0.10333	1.03198e-12	2.95693e-11		WBGene00009471	F36D3.5	56.7484	34.0368	57.2313	25.8086	40.8601	19.7385	77.6275	41.9506	44.2502	-0.710942	0.348202	0.001217	0.0189759		WBGene00010925	M153.2	129.825	217.723	185.175	117.468	98.4531	197.73	122.409	182.88	156.458	0.702082	0.143977	9.10049e-08	2.44312e-06
WBGene00020895	plpp-1.2	233.818	219.603	212.839	251.256	384.513	470.329	401.239	348.349	315.243	-0.779579	0.114967	1.12279e-12	3.21207e-11		WBGene00010612	K07A1.5	84.5884	57.2599	72.2352	36.09	58.6218	41.3918	71.5535	40.9876	57.841	-0.547896	0.262207	0.00122612	0.01906		WBGene00009581	F40F9.3	112.03	52.7936	45.0993	76.1783	95.5231	39.7152	130.895	41.446	74.21	-1.12101	0.234052	9.39245e-08	2.51335e-06
WBGene00009896	scl-3	479.15	410.959	464.637	403.815	276.091	295.229	240.434	265.466	354.473	0.684917	0.100678	1.22505e-12	3.49359e-11		WBGene00011801	T16G1.7	71.5707	59.714	61.4974	45.394	92.8442	23.5091	91.813	49.2126	61.9444	-0.638023	0.314348	0.00126227	0.0195036		WBGene00017705	F22E5.6	16.5644	5.49971	2.08813	31.2023	23.1529	2.90286	34.6	0	14.5013	-3.08832	0.636536	9.64172e-08	2.56761e-06
WBGene00012634	Y38H6C.23	317.058	331.544	382.402	418.521	143.321	149.257	231.773	158.657	266.567	1.04852	0.156295	1.38171e-12	3.92803e-11		WBGene00017114	E03H12.7	38.8021	34.894	47.3609	19.5653	48.7498	21.6575	45.1207	20.9212	34.6339	-0.679142	0.335538	0.00126603	0.0195421		WBGene00008105	C45B11.2	33.1791	7.69975	6.28572	34.8783	35.4561	7.7476	22.9939	4.2501	19.0613	-2.11851	0.44216	1.03158e-07	2.72521e-06
WBGene00021340	Y34F4.5	569.82	550.115	565.037	582.885	356.545	397.12	406.702	397.772	478.249	0.52618	0.0769312	1.39282e-12	3.94809e-11		WBGene00007987	C36H8.1	38.5521	40.9658	76.5923	34.0423	48.6389	18.8086	66.2188	22.7813	43.325	-0.743594	0.372732	0.00127294	0.0196046		WBGene00043147	nspd-6	130.406	80.0624	67.958	132.719	149.693	51.2787	257.241	75.3207	118.085	-1.191	0.250807	1.08172e-07	2.8486e-06
WBGene00195176	Y43F8B.24	99.488	142.1	159.209	125.414	35.9093	52.5928	54.2994	44.9849	89.2498	1.44148	0.215486	1.39311e-12	3.94809e-11		WBGene00013304	ptp-5.2	39.4493	18.7367	33.4478	19.6028	24.315	16.9261	49.4353	16.4049	27.2897	-0.785689	0.390335	0.00127978	0.019636		WBGene00015713	C12D12.1	354.62	252.271	182.078	339.817	295.957	192.414	399.564	224.57	280.161	-0.659508	0.136006	1.11434e-07	2.92585e-06
WBGene00045058	gadr-5	144.427	180.588	109.671	140.242	278.991	277.925	304.058	286.193	215.262	-0.963518	0.143448	1.41038e-12	3.99081e-11		WBGene00050956	C14A6.13	64.5494	34.9575	52.7747	29.8806	38.753	23.5313	51.2816	28.2131	40.4926	-0.634397	0.314244	0.00133357	0.0202193		WBGene00007963	cyp-25A1	241.013	318.874	526.384	269.804	201.462	468.21	147.474	379.62	319.105	0.908631	0.189719	1.11762e-07	2.92915e-06
WBGene00007130	B0272.4	220.531	229.528	217.715	246.627	359.88	350.382	445.085	385.184	306.866	-0.728297	0.10778	1.47256e-12	4.16026e-11		WBGene00007894	C33D3.3	25.7438	37.395	21.5629	41.2459	12.1667	37.6287	18.5508	37.3444	28.9548	0.726429	0.362125	0.00134229	0.0203114		WBGene00016407	C34D10.2	536.803	385.066	367.05	541.889	722.891	444.648	563.895	351.047	489.161	-0.575843	0.118045	1.18703e-07	3.0915e-06
WBGene00014203	ZK1058.3	430.599	438.026	422.45	396.682	621.836	574.206	627.594	600.108	513.938	-0.505844	0.0740876	1.6214e-12	4.54543e-11		WBGene00012186	mlt-11	26.2496	58.8045	45.5017	180.59	52.8459	197.467	34.1809	60.7089	82.0436	1.22113	0.643723	0.0013478	0.0203547		WBGene00009457	F36A2.10	126.228	71.5343	40.6212	97.317	114.384	45.4708	204.792	48.8329	93.6475	-1.28811	0.273477	1.25583e-07	3.26042e-06
WBGene00016735	fhod-1	913.724	918.035	848.483	815.174	602.754	668.43	616.416	560.239	742.907	0.501956	0.0735333	1.63715e-12	4.58252e-11		WBGene00006553	tbx-34	61.6371	32.7022	38.8053	23.7128	43.1452	19.7572	39.7589	20.9459	35.0581	-0.697638	0.350782	0.00135184	0.0203757		WBGene00235133	T26H5.14	30.8406	10.9908	13.4019	66.305	52.1347	14.5106	39.6783	11.6736	29.9419	-1.76098	0.373989	1.35607e-07	3.50421e-06
WBGene00016783	irg-2	110.781	117.167	178.719	129.957	48.6691	39.7626	57.5772	37.9037	90.0671	1.49394	0.224468	1.73812e-12	4.85766e-11		WBGene00010310	F59B2.8	14.6909	19.8919	17.2584	41.2602	13.2665	32.9169	13.245	31.8912	23.0526	0.833815	0.421437	0.00136518	0.0205566		WBGene00011090	R07B7.6	286.871	182.514	209.499	288.137	292.167	204.527	288.049	196.71	243.559	-0.510198	0.104494	1.39616e-07	3.60218e-06
WBGene00012961	Y47H10A.5	736.81	827.442	1219.4	1343.04	151.376	164.497	277.847	293.466	626.735	2.12699	0.322661	2.22638e-12	6.21265e-11		WBGene00015662	C10A4.1	43.088	80.8584	45.3278	60.8831	47.5128	72.3962	37.0681	62.8981	56.254	0.515849	0.251091	0.00136946	0.0206008		WBGene00008495	F01D5.5	225.492	129.85	125.936	230.43	201.027	105.447	163.297	88.0987	158.697	-0.811573	0.170447	1.4052e-07	3.61986e-06
WBGene00012554	Y37D8A.16	421.71	475.429	425.638	456.024	304.938	262.895	290.391	289.361	365.798	0.60987	0.090611	2.36748e-12	6.58616e-11		WBGene00010915	M110.7	21.0561	15.2549	26.994	12.3875	32.0278	12.2195	29.9943	10.0311	19.9956	-0.853117	0.436899	0.00141063	0.0210709		WBGene00012595	Y38E10A.17	216.161	138.535	79.0325	164.263	202.906	59.1431	304.904	87.2089	156.519	-1.19239	0.254069	1.40842e-07	3.62253e-06
WBGene00002021	hsp-17	1478.39	1588.17	1536.42	1992.67	621.408	758.984	630.991	911.608	1189.83	1.12776	0.170518	2.57946e-12	7.15396e-11		WBGene00020080	math-37	45.0025	73.6987	31.2781	48.4776	43.1201	73.3611	27.3752	59.2224	50.192	0.596019	0.300596	0.00146221	0.0216155		WBGene00003425	msp-10	381.394	243.264	198.658	313.437	323.517	128.59	585.657	169.773	293.036	-1.03297	0.219801	1.49366e-07	3.82822e-06
WBGene00235133	T26H5.14	32.3583	69.4133	54.5537	41.2623	8.34647	6.42679	5.54458	6.1844	28.0112	2.77891	0.419218	2.60459e-12	7.21264e-11		WBGene00016549	C40A11.6	32.2166	46.6922	39.8754	55.6655	26.5561	76.2144	37.1148	56.4542	46.3487	0.5951	0.299203	0.00147323	0.0217365		WBGene00007833	oac-6	265.056	113.243	163.414	304.662	437.988	217.202	394.895	191.449	260.989	-0.958027	0.203227	1.52283e-07	3.89261e-06
WBGene00013699	Y106G6D.2	156.664	177.091	116.163	161.37	300.576	303.99	345.562	264.51	228.241	-0.957137	0.144514	2.61635e-12	7.2342e-11		WBGene00010072	F54F12.1	38.4377	19.955	32.3965	10.3238	27.607	18.7981	35.2839	16.416	24.9022	-0.768156	0.396717	0.00149414	0.0219398		WBGene00021969	Y57G7A.6	119.567	54.9696	63.3	108.281	91.4094	49.4588	153.957	51.0586	86.5002	-1.02466	0.21862	1.63361e-07	4.16935e-06
WBGene00019977	fpn-1.2	118.868	91.19	90.9958	100.835	226.17	224.911	184.76	185.862	152.949	-0.998369	0.150766	2.62867e-12	7.2572e-11		WBGene00007081	AH6.3	43.3021	11.6627	28.0116	13.3978	22.1372	19.7627	39.7773	16.3858	24.3046	-0.827652	0.430131	0.00150004	0.0219585		WBGene00016997	cebp-1	150.537	83.5123	75.6819	186.371	276.592	134.053	244.328	89.9915	155.133	-1.07619	0.230261	1.72612e-07	4.38519e-06
WBGene00020191	clec-53	76.8149	73.6106	114.545	68.5661	210.206	204.224	174.927	192.145	139.38	-1.16679	0.176265	2.69337e-12	7.4133e-11		WBGene00010114	F55D12.6	60.9693	41.8764	62.4321	21.6253	34.3454	28.2484	55.7357	20.0121	40.6556	-0.703134	0.365196	0.00149787	0.0219585		WBGene00015369	ugt-51	80.0012	147.338	150.594	55.0615	103.022	177.407	81.1383	156.322	118.861	0.910034	0.194104	1.86926e-07	4.70553e-06
WBGene00021594	tig-3	24.1563	17.4397	16.2478	22.8458	75.2329	58.0564	73.0603	82.8413	46.2351	-1.78647	0.271628	2.77785e-12	7.63425e-11		WBGene00303058	F47G4.14	48.4122	101.571	70.9715	117.314	35.5026	115.015	70.8984	62.6001	77.7856	0.59782	0.309885	0.00160386	0.0231746		WBGene00004818	skr-12	151.185	289.376	230.744	177.173	135.883	406.509	165.01	254.872	226.344	0.84765	0.180756	1.90461e-07	4.78725e-06
WBGene00013037	Y49E10.18	1025.78	1000	1028.5	1180.58	750.35	760.179	604.375	726.149	884.489	0.55554	0.0826565	2.88855e-12	7.92649e-11		WBGene00008235	C50F4.10	60.6522	42.0891	53.9164	20.6255	46.4468	22.5752	57.4104	36.4385	42.5193	-0.627802	0.331861	0.00168214	0.0241243		WBGene00013290	Y57G11A.2	215.143	167.119	99.0799	222.993	214.408	79.5079	335.636	78.704	176.574	-1.12722	0.243845	2.04833e-07	5.12516e-06
WBGene00019411	K05F1.10	455.868	539.384	409.394	558.358	277.16	314.476	262.636	274.323	386.45	0.767678	0.115647	3.12187e-12	8.55382e-11		WBGene00013526	Y73F8A.20	49.5235	24.6003	26.9774	14.4455	33.1527	15.0444	45.8991	22.7869	29.0537	-0.752651	0.405041	0.00170293	0.0243543		WBGene00003766	nlp-28	525.785	284.932	293.133	502.44	772.075	456.418	749.859	352.95	492.199	-0.814536	0.17413	2.06494e-07	5.15892e-06
WBGene00012901	cnp-2	159.816	171.837	193.376	184.684	83.2294	100.135	80.7366	87.1803	132.624	0.979316	0.148612	3.53473e-12	9.64142e-11		WBGene00017498	pud-4	158.786	412.763	272.99	444.1	183.424	215.713	157.035	393.446	279.782	0.676377	0.366573	0.0017316	0.0246725		WBGene00012926	Y47D3A.13	85.8732	51.7256	36.4512	84.4602	75.745	29.0235	120.346	30.7856	64.3013	-1.20635	0.261332	2.07974e-07	5.18807e-06
WBGene00004819	skr-13	275.95	274.188	213.625	272.992	403.13	417.144	460.04	428.953	343.253	-0.701333	0.10582	3.69955e-12	1.00608e-10		WBGene00007633	C16D2.1	47.1715	27.1886	35.9708	13.0247	29.5302	15.7605	38.3595	21.3516	28.5447	-0.720128	0.398537	0.00180414	0.0255404		WBGene00020128	R193.2	1921.34	4062.95	3454.4	1567.26	2031.21	2809.2	2353.69	3692.95	2736.62	0.774625	0.165288	2.12673e-07	5.28935e-06
WBGene00020544	fbxb-84	78.3409	82.7892	66.9957	85.9097	160.665	154.572	193.758	157.792	122.603	-1.04882	0.160139	4.0803e-12	1.09974e-10		WBGene00015366	C03A7.2	22.997	45.5531	21.5591	42.2716	27.6564	55.5076	26.5053	35.5178	34.696	0.626411	0.336433	0.00181584	0.0256823		WBGene00007791	C28A5.6	188.216	144.016	131.926	201.878	247.297	79.5279	262.182	86.1667	167.651	-0.953167	0.205393	2.14094e-07	5.31673e-06
WBGene00010902	M79.2	555.52	570.258	579.275	710.914	889.51	844.582	930.559	888.887	746.188	-0.542516	0.0814644	4.42101e-12	1.18454e-10		WBGene00002193	kin-5	74.2883	35.142	59.3494	21.668	40.8889	35.7307	75.0284	44.6617	48.3447	-0.630856	0.341139	0.00182994	0.0258089		WBGene00012622	Y38H6C.9	43.9872	26.218	24.2756	73.1889	86.6305	28.7128	87.5683	26.7055	49.6608	-1.34736	0.292206	2.15545e-07	5.34473e-06
WBGene00020358	math-39	195.341	203.404	174.661	203.284	87.1991	111.788	102.962	95.1898	146.729	0.932346	0.142286	4.51814e-12	1.20879e-10		WBGene00009321	F32B6.4	82.9379	57.1347	90.4918	35.0383	57.5612	36.7037	82.2122	59.1671	62.6559	-0.542318	0.289768	0.00186342	0.0260913		WBGene00045052	K12C11.6	115.673	60.5406	65.3655	103.773	103.016	57.0627	124.287	48.8036	84.8151	-0.872838	0.18831	2.435e-07	5.99308e-06
WBGene00009222	fbxa-95	604.766	618.009	611.722	606.183	429.519	438.58	440.617	367.528	514.616	0.52878	0.0794095	4.73239e-12	1.26425e-10		WBGene00010010	gmeb-2	26.5798	38.6804	34.5384	73.2706	26.5165	46.0682	21.1802	43.7581	38.824	0.649847	0.360746	0.00194995	0.0271164		WBGene00011821	cdf-2	59.6557	116.616	89.2427	51.0954	44.1884	114.446	57.6429	200.441	91.666	1.17616	0.25759	2.46023e-07	6.04619e-06
WBGene00016274	C30G12.2	2069.51	1918.24	1870.12	2195.79	2877.49	3199.4	2484.12	3326.95	2492.7	-0.545655	0.0820831	4.81821e-12	1.28528e-10		WBGene00019410	K05F1.9	59.0334	38.4427	50.6156	39.151	65.333	40.476	62.7812	25.4808	47.6642	-0.535694	0.289264	0.00195251	0.0271164		WBGene00016667	C45E5.4	307.74	215.624	213.34	313.009	287.75	194.596	331.749	141.279	250.636	-0.648662	0.138227	2.47879e-07	6.08277e-06
WBGene00011339	T01G5.1	222.261	177.501	204.738	210.117	332.47	468.061	357.376	350.604	290.391	-0.855103	0.130545	4.89147e-12	1.30291e-10		WBGene00022876	ZK1248.5	42.2815	26.8849	69.008	24.7493	43.1323	19.7541	44.1647	35.5255	38.1875	-0.635445	0.360371	0.00208692	0.0287237		WBGene00018384	F43C11.7	323.641	185.877	204.52	271.672	309.68	207.294	314.607	224.233	255.191	-0.532137	0.112009	2.48692e-07	6.0937e-06
WBGene00015756	C14C6.2	471.022	439.503	452.473	477.587	335.942	249.398	230.056	250.574	363.32	0.758122	0.115379	5.12162e-12	1.36222e-10		WBGene00008312	C54G4.2	28.4578	21.0662	38.8342	17.5365	33.1639	19.7494	43.2642	17.3134	27.4232	-0.660212	0.384608	0.00225903	0.0305725		WBGene00017448	F14B8.6	454.999	360.659	338.96	461.605	456.77	277.237	543.085	342.397	404.464	-0.505435	0.106317	2.60817e-07	6.37193e-06
WBGene00019922	fbxc-28	216.583	190.027	164.111	199.424	355.607	305.486	399.498	323.35	269.261	-0.818662	0.125025	5.16835e-12	1.37263e-10		WBGene00012261	lpr-3	24.7453	38.6826	28.063	71.2077	45.2981	76.1527	27.3572	46.4937	44.75	0.641193	0.375203	0.00226534	0.0306309		WBGene00013901	ugt-16	294.065	184.718	186.454	309.259	287.497	140.577	380.42	229.709	251.587	-0.722294	0.155295	2.62443e-07	6.40221e-06
WBGene00008793	F14D7.6	98.7	110.393	76.2191	89.9762	259.863	199.539	165.803	234.648	154.393	-1.1561	0.177794	5.30117e-12	1.40586e-10		WBGene00007457	C08F11.10	54.2928	32.6933	64.6692	18.5565	43.1495	39.5165	51.2494	29.1399	41.6584	-0.589943	0.341635	0.00230231	0.0310258		WBGene00003424	msp-3	390.825	241.078	205.953	289.497	310.275	135.359	479.581	149.59	275.27	-0.929527	0.202371	2.68888e-07	6.54018e-06
WBGene00001817	haf-7	695.895	796.339	854.772	722.842	486.329	571.876	468.868	475.47	634.049	0.599981	0.0907017	5.33649e-12	1.41316e-10		WBGene00009416	F35E2.9	55.9116	44.5393	56.124	40.2468	62.9777	43.248	84.7218	29.1717	52.1176	-0.524847	0.299986	0.00233926	0.0313274		WBGene00017861	F27D9.2	327.281	236.4	209.573	390.936	287.535	218.125	334.828	216.938	277.702	-0.565297	0.120071	2.77133e-07	6.73083e-06
WBGene00001754	gst-6	229.857	234.073	268.875	247.033	144.418	142.814	121.861	139.33	191.033	0.806447	0.123144	5.74049e-12	1.51793e-10		WBGene00016605	C43E11.5	86.3326	49.1318	77.6555	51.5717	51.9655	54.5507	95.3721	33.7111	62.5364	-0.521847	0.298302	0.00235323	0.0314323		WBGene00003734	nhx-6	1034.89	412.232	143.285	1126.52	1089.65	255.916	689.622	338.138	636.281	-1.63417	0.361595	2.78873e-07	6.76318e-06
WBGene00004898	snb-2	567.501	608.457	605.934	655.614	372.512	451.562	414.561	406.82	510.37	0.550177	0.0833316	6.4929e-12	1.71439e-10		WBGene00011114	R07E5.6	68.8247	35.1226	57.1798	38.1713	42.0024	31.0326	53.8535	27.3396	44.1908	-0.543469	0.313242	0.00235842	0.0314469		WBGene00018259	F41B4.3	344.791	190.407	214.634	361.894	403.691	302.662	444.053	176.138	304.784	-0.753332	0.162635	2.81175e-07	6.80905e-06
WBGene00021879	clec-83	448.47	455.205	412.97	454.345	315.9	289.89	255.99	271.398	363.021	0.619509	0.0943921	7.11548e-12	1.86792e-10		WBGene00006050	ssq-1	561.225	387.721	490.44	279.392	325.259	273.783	530.134	231.31	384.908	-0.503226	0.288713	0.00236057	0.0314483		WBGene00021858	Y54F10BM.3	166.329	98.948	103.351	168.847	188.23	118.305	196.237	115.939	144.523	-0.669564	0.143632	2.83587e-07	6.85743e-06
WBGene00020200	T04A6.1	241.215	193.132	175.447	207.691	324.993	342.298	363.312	370.6	277.336	-0.754519	0.11608	7.90088e-12	2.06217e-10		WBGene00008043	C40H1.8	23.8889	52.6207	31.2735	41.253	44.2322	67.7233	20.3133	54.6605	41.9957	0.613061	0.366854	0.00243266	0.0321541		WBGene00013854	cyc-2.2	216.731	169.51	136.784	229.652	234.08	115.061	331.454	95.4902	191.095	-0.895503	0.195132	2.85036e-07	6.88243e-06
WBGene00008985	F20G2.1	113.936	132.576	129.16	124.039	34.0105	61.2273	52.056	29.9779	84.6228	1.44841	0.225971	8.27384e-12	2.15642e-10		WBGene00017215	F07F6.1	51.3833	31.6138	53.9453	36.109	40.8954	28.2109	66.211	30.0745	42.3054	-0.540092	0.315718	0.00247949	0.0324423		WBGene00012624	fbxa-150	233.558	171.557	148.146	223.016	223.978	133.722	238.335	116.932	186.156	-0.641561	0.137595	2.93487e-07	7.06587e-06
WBGene00018675	F52C9.5	47.3676	36.8808	50.3742	46.7885	4.57512	7.53544	7.74287	10.5685	26.4791	2.46194	0.381939	8.48061e-12	2.20084e-10		WBGene00000556	cnc-2	68.9504	29.2487	59.7703	24.0282	119.224	78.3855	140.395	54.0076	71.7512	-0.731877	0.4596	0.00250588	0.032704		WBGene00007584	C14C10.1	137.005	86.8801	77.7269	127.57	134.714	46.5093	216.64	54.2115	110.157	-1.11787	0.248155	3.5923e-07	8.59867e-06
WBGene00007959	C35C5.10	326.018	288.876	315.703	334.481	493.712	477.295	487.365	442.114	395.696	-0.568974	0.0869274	8.92937e-12	2.3107e-10		WBGene00007763	C27B7.6	36.7095	24.5838	35.6015	19.6011	28.7393	12.2252	45.9091	20.0486	27.9273	-0.668212	0.410395	0.00254073	0.0329352		WBGene00044674	B0280.17	167.002	94.589	81.8018	126.658	150.994	52.3071	282.482	64.825	127.582	-1.19909	0.268717	4.01475e-07	9.54094e-06
WBGene00018562	F47D12.6	145.941	162.825	145.582	167.486	80.6683	74.952	70.9888	76.8433	115.661	0.988584	0.153479	9.35609e-12	2.41768e-10		WBGene00015992	C18H2.5	42.1051	29.3411	45.3526	15.485	25.3999	20.6785	44.9892	16.4153	29.9708	-0.663145	0.421212	0.00272656	0.034758		WBGene00009959	F53B6.4	479.579	325.499	280.183	354.79	447.178	208.741	648.598	210.807	369.422	-0.841521	0.187372	4.75343e-07	1.12e-05
WBGene00001559	gei-1	758.878	752.38	762.615	795.866	584.694	560.385	481.456	472.713	646.123	0.530805	0.0810492	9.91046e-12	2.55729e-10		WBGene00001487	frk-1	56.6464	36.8347	58.9714	27.3266	40.9977	25.5211	48.5379	32.1321	40.871	-0.529779	0.324611	0.00281015	0.0356757		WBGene00012686	Y39B6A.27	83.0949	39.5855	36.8323	77.0879	67.6797	27.1405	88.0677	39.3419	57.3538	-1.05166	0.235796	4.80051e-07	1.12948e-05
WBGene00012916	Y46G5A.28	222.108	222.037	220.982	224.633	350.072	331.318	388.42	338.319	287.236	-0.638032	0.0987037	1.29959e-11	3.31113e-10		WBGene00015306	C01G5.4	52.9328	27.846	53.1446	22.6269	24.2076	19.8928	45.0746	22.9752	33.5876	-0.626617	0.409248	0.00296162	0.0370782		WBGene00020414	T10E9.4	321.162	185.809	198.169	243.181	290.481	113.445	440.641	151.028	242.99	-0.91893	0.205688	4.89215e-07	1.14941e-05
WBGene00012851	Y44A6C.2	297.973	257.91	274.602	242.653	430.72	456.099	538.92	396.469	361.918	-0.731456	0.113843	1.37526e-11	3.49903e-10		WBGene00019248	H27M09.5	74.4415	43.2556	52.8369	24.7503	55.295	36.6851	48.579	32.7941	46.0797	-0.519743	0.329202	0.00301865	0.0376388		WBGene00011263	R13H4.5	332.219	235.335	243.846	296.433	317.823	203.505	365.37	194.544	273.634	-0.540262	0.117534	5.05733e-07	1.18152e-05
WBGene00008584	irg-4	110.952	73.6529	94.2391	94.9591	212.771	251.625	160.493	289.035	160.966	-1.23959	0.195301	1.39674e-11	3.54871e-10		WBGene00020072	R13H9.6	55.1079	36.2627	58.2409	41.257	44.2265	32.9188	84.7762	33.7107	48.3126	-0.524423	0.330446	0.00306833	0.0380423		WBGene00020661	smz-2	232.469	157.267	162.765	224.855	220.189	109.485	318.749	115.859	192.705	-0.800744	0.178677	5.19449e-07	1.21015e-05
WBGene00014220	ZK1098.3	242.497	242.717	225.877	237.439	440.815	381.171	389.298	339.029	312.355	-0.684124	0.106291	1.40388e-11	3.56186e-10		WBGene00018525	F47B3.1	37.6864	23.3777	32.3473	18.5619	35.3908	19.7541	38.8652	18.2181	28.0252	-0.587118	0.381923	0.00307572	0.0380726		WBGene00008886	F16C3.2	185.806	119.87	128.178	221.18	261.697	137.597	190.219	130.751	171.912	-0.685256	0.151851	5.63349e-07	1.30508e-05
WBGene00009546	fbxb-3	61.5629	47.5053	44.6835	45.6533	116.403	125.849	122.839	107.491	83.9984	-1.19497	0.188386	1.48409e-11	3.75487e-10		WBGene00018530	F47B3.6	37.6864	23.3777	32.3473	18.5619	35.3908	19.7541	38.8652	18.2181	28.0252	-0.587118	0.381923	0.00307572	0.0380726		WBGene00013996	ZK550.2	252.479	318.864	399.158	255.118	211.417	346.095	243.392	342.424	296.119	0.515358	0.112279	5.65506e-07	1.30825e-05
WBGene00008656	lron-5	189.503	176.656	163.311	212.323	60.3831	89.3547	94.0168	47.5566	129.138	1.29884	0.206309	1.77043e-11	4.47312e-10		WBGene00001075	dpy-14	119.53	225.528	130.453	696.016	222.322	662.272	101.589	174.879	291.574	1.05565	0.812308	0.00308845	0.0381994		WBGene00001150	ech-1.1	132.019	228.681	207.738	172.518	116.016	275.392	108.399	220.174	182.617	0.754703	0.168676	5.98683e-07	1.38114e-05
WBGene00009895	scl-2	205.383	254.344	252.978	187.338	391.268	384.704	353.607	412.63	305.282	-0.742991	0.11644	1.89028e-11	4.75607e-10		WBGene00021787	Y51H7C.9	73.4389	38.6217	51.7791	20.6313	47.5349	42.32	67.9865	38.2717	47.573	-0.536766	0.348679	0.00316938	0.0389808		WBGene00009773	lipl-2	16.6135	46.1859	72.5518	27.5321	24.6208	63.9636	25.1865	60.5996	42.1567	1.25628	0.285352	6.00502e-07	1.38186e-05
WBGene00015609	math-4	322.433	311.692	300.145	281.325	505.8	442.03	446.284	445.8	381.939	-0.577686	0.0900058	2.04335e-11	5.1341e-10		WBGene00005018	sqt-3	170.479	288.765	209.259	595.257	262.229	598.152	146.868	238.063	313.634	0.739641	0.545596	0.00329	0.0401751		WBGene00011672	cyp-13A5	390.653	104.456	139.007	486.377	804.961	259.809	693.689	164.829	380.473	-1.67204	0.384178	6.00664e-07	1.38186e-05
WBGene00015573	C07G1.7	50.2585	34.8158	20.3372	67.7356	0	2.14818	4.44056	1.76781	22.6879	4.22332	0.66475	2.20649e-11	5.51348e-10		WBGene00017553	nep-8	39.7182	66.2686	44.3085	54.7942	44.0681	113.582	49.643	62.2482	59.3289	0.502597	0.330403	0.00334444	0.0406533		WBGene00019563	K09C6.9	82.8322	157.346	181.62	110.161	94.2057	191.63	123.505	170.969	139.034	0.7204	0.161256	6.40991e-07	1.46649e-05
WBGene00001617	glr-6	134.363	139.356	120.378	111.453	220.397	224.612	260.113	217.827	178.562	-0.830602	0.13174	2.62093e-11	6.51324e-10		WBGene00001777	gst-29	6.46191	16.2957	9.68985	21.631	7.7538	16.9465	4.42245	16.3763	12.4472	0.88875	0.638067	0.00334502	0.0406533		WBGene00021583	clec-72	115.299	53.8798	52.6233	89.0178	86.9022	52.3435	117.79	43.5958	76.4314	-0.925914	0.209848	6.4851e-07	1.48164e-05
WBGene00019090	F59A7.2	155.016	103.073	170.687	155.172	57.4497	69.5914	46.57	40.6422	99.7751	1.3863	0.222956	3.04642e-11	7.54996e-10		WBGene00007614	gnrr-2	24.7993	31.5828	11.8638	34.0367	14.3738	32.9189	19.428	38.2659	25.9087	0.631005	0.433962	0.00338274	0.0409498		WBGene00015537	C06E4.8	65.322	29.699	25.1436	69.7565	51.6419	16.4637	65.5304	28.6883	44.0307	-1.22529	0.280381	6.70125e-07	1.52682e-05
WBGene00003092	lys-3	80.1266	122.055	151.915	105.838	15.6017	13.9746	43.1757	32.6101	70.6621	2.03659	0.328636	3.08564e-11	7.63674e-10		WBGene00018352	fbxc-20	9.1853	14.0362	3.23553	15.4711	4.42276	19.7515	3.53242	11.8441	10.1849	1.03463	0.744569	0.00339805	0.0410666		WBGene00007307	spch-1	271.4	152.925	152.589	190.014	242.309	77.4426	348.122	92.4074	190.901	-1.05023	0.240924	7.24634e-07	1.63973e-05
WBGene00022486	fbxa-61	139.408	126.903	125.919	144.318	70.6621	63.4249	47.6031	58.1685	97.0509	1.10325	0.176983	3.31778e-11	8.2001e-10		WBGene00020071	R13H9.5	57.9396	28.0387	62.5263	18.5593	47.5653	31.0453	63.6083	51.0031	45.0357	-0.557811	0.38894	0.00354202	0.0422787		WBGene00022142	Y71G12B.2	92.3322	53.8922	35.6711	89.0268	86.2657	49.405	97.5613	42.5109	68.3332	-0.924386	0.210742	7.45828e-07	1.68539e-05
WBGene00009982	F53F1.4	1078	829.295	721.433	740.426	1457.87	1567.37	1275.07	1307.2	1122.08	-0.707372	0.112628	3.64632e-11	8.96334e-10		WBGene00009149	F26D2.10	38.4429	19.9524	41.0336	21.6791	36.443	26.318	51.1638	27.359	32.799	-0.529221	0.377411	0.00380208	0.0447048		WBGene00010125	dod-22	100.299	62.6014	48.8408	101.873	127.773	62.4356	112.316	60.5145	84.5815	-0.845145	0.192043	7.63712e-07	1.72167e-05
WBGene00011726	lpr-2	109.217	120.443	118.629	112.657	216.597	198.189	248.791	194.578	164.888	-0.854902	0.136807	3.66311e-11	8.99245e-10		WBGene00000695	col-121	3.67578	8.18422	5.39169	42.2827	13.2704	31.0407	1.76646	8.19872	14.2263	1.15923	1.15117	0.00398206	0.0463438		WBGene00016357	C33F10.11	144.186	78.8277	72.0573	103.335	122.396	46.9265	191.87	46.5838	100.773	-1.09787	0.252885	7.63961e-07	1.72167e-05
WBGene00009202	aptf-4	317.205	262.997	233.183	275.961	420.049	462.863	553.082	435.083	370.053	-0.75171	0.120028	3.66833e-11	8.99311e-10		WBGene00012741	Y40H4A.2	49.649	42.0691	52.829	29.9032	47.5608	18.8144	45.052	21.8601	38.4672	-0.523344	0.39207	0.00399571	0.0464675		WBGene00003094	lys-5	151.219	72.6134	89.855	139.528	118.857	84.2134	186.809	65.85	113.618	-0.849384	0.193634	7.72219e-07	1.73555e-05
WBGene00016719	math-24	251.824	241.443	212.859	206.598	138.366	126.939	122.83	116.295	177.144	0.820368	0.13119	3.74963e-11	9.16766e-10		WBGene00012357	W09D6.4	62.1075	59.1319	61.2787	22.6358	49.8845	27.3304	77.9503	33.6308	49.2437	-0.530686	0.413954	0.00416577	0.0480815		WBGene00185092	K08D8.7	104.711	37.5456	39.6278	74.5573	89.1244	43.204	78.6554	46.0097	64.1794	-0.971079	0.222221	7.77409e-07	1.74249e-05
WBGene00011681	T10B10.4	160.584	133.106	193.014	156.863	279.049	277.915	310.234	283.688	224.307	-0.800928	0.128123	3.83621e-11	9.35418e-10		WBGene00016422	noah-1	485.087	676.055	523.745	1383.34	662.599	1208.71	418.139	624.688	747.795	0.56086	0.471341	0.00434314	0.0496073		WBGene00015476	C05D9.9	216.183	111.425	161.23	201.652	254.437	132.442	245.385	152.987	184.468	-0.665261	0.150556	8.8122e-07	1.95664e-05
WBGene00013594	Y87G2A.2	323.604	246.936	307.073	300.804	476.548	437.408	493.823	445.138	378.917	-0.629552	0.100064	4.0505e-11	9.84649e-10																		WBGene00194700	B0025.5	86.3518	52.7474	38.1478	79.1957	77.0204	35.7965	114.376	27.5951	63.9038	-1.10351	0.255855	8.86578e-07	1.96327e-05
WBGene00017436	F13H8.3	910.237	735.841	757.995	702.828	1134.72	1242.34	1031.41	1163.02	959.799	-0.538703	0.0852126	4.25876e-11	1.02878e-09																		WBGene00013713	Y106G6G.4	178.531	100.076	86.1416	131.24	145.482	70.7349	255.572	80.7875	131.071	-0.979869	0.22664	8.92243e-07	1.97318e-05
WBGene00007072	ugt-1	268.659	276.538	260.804	244.819	433.887	375.627	397.143	397.237	331.839	-0.588038	0.0932947	4.29197e-11	1.03543e-09																		WBGene00044280	W02A2.9	71.9849	36.8589	28.0324	94.2265	122.506	62.9836	143.193	29.791	73.6971	-1.32153	0.308437	9.35914e-07	2.06425e-05
WBGene00007153	clec-41	10696	12662.1	10158.7	11189.4	6783.99	7221.04	5800.83	5174.92	8710.87	0.805625	0.129506	4.66346e-11	1.12059e-09																		WBGene00045355	D1086.17	143.079	87.9978	87.9912	122.992	140.29	59.0743	197.77	49.9379	111.142	-0.990245	0.230479	1.00953e-06	2.21189e-05
WBGene00000616	col-39	845.396	726.619	683.22	1149.58	194.519	349.401	177.12	241.478	545.916	1.73826	0.283592	4.70724e-11	1.12961e-09																		WBGene00020329	bath-26	50.853	16.4965	17.852	68.8332	45.4232	17.4402	38.983	20.1957	34.5096	-1.3743	0.32167	1.03821e-06	2.2715e-05
WBGene00018210	F39G3.5	313.069	305.707	302.881	270.805	199.955	158.075	177.097	181.339	238.616	0.705041	0.11318	5.38662e-11	1.28924e-09																		WBGene00001104	dsl-2	376.672	545.5	432.486	316.636	256.418	684.962	320.028	453.844	423.318	0.683797	0.156389	1.04287e-06	2.2759e-05
WBGene00010998	R03G8.3	221.495	306.751	231.562	266.269	108.856	159.343	124.982	116.245	191.938	0.970628	0.157512	5.42981e-11	1.29787e-09																		WBGene00003604	nhr-5	271.756	194.208	188.816	255.452	261.855	157.36	327.903	189.319	230.834	-0.567738	0.128447	1.06294e-06	2.31665e-05
WBGene00010724	K09E9.1	512.574	458.105	426.451	499.512	293.816	340.928	303.002	296.097	391.311	0.596014	0.0953786	5.72905e-11	1.36222e-09																		WBGene00284847	F54D8.10	45.0963	142.442	139.926	41.4764	85.9611	120.142	66.6998	118.701	95.0556	1.02162	0.238073	1.07306e-06	2.33563e-05
WBGene00008177	C48D1.1	103.675	116.416	61.3576	82.6517	205.349	221.289	198.984	190.667	147.549	-1.11495	0.181798	5.76629e-11	1.36929e-09																		WBGene00003640	nhr-50	87.1876	45.1911	59.5993	115.341	130.272	62.2273	99.3774	47.789	80.873	-0.926959	0.215286	1.08735e-06	2.36363e-05
WBGene00010545	cbp-2	606.152	737.25	821.705	807.267	421.126	411.643	535.577	440.041	597.595	0.691423	0.111213	5.78917e-11	1.37292e-09																		WBGene00001703	grd-14	167.069	248.776	344.514	176.865	219.459	271.494	158.456	308.545	236.897	0.642293	0.146512	1.10545e-06	2.39356e-05
WBGene00001577	gem-4	555.2	572.627	709.302	549.46	362.346	324.025	400.416	396.318	483.712	0.662825	0.106411	5.84793e-11	1.38505e-09																		WBGene00015112	B0281.5	353.873	507.057	462.174	379.579	282.299	648.403	321.371	456.245	426.375	0.588898	0.133901	1.13566e-06	2.45256e-05
WBGene00018755	bcmo-2	266.407	327.931	337.175	310.864	179.441	137.756	196.921	178.807	241.913	0.809203	0.130805	5.91301e-11	1.39864e-09																		WBGene00009957	F53B2.8	396.008	59.3999	69.1133	430.477	762.467	209.167	514.168	67.9969	313.6	-2.15307	0.514676	1.15852e-06	2.49866e-05
WBGene00014206	nit-1	160.807	156.115	184.733	182.34	274.403	268.082	292.841	300.911	227.529	-0.702861	0.11316	5.93297e-11	1.40154e-09																		WBGene00017112	E03H12.5	171.033	112.202	97.3607	130.337	185.823	76.497	249.686	77.5555	137.562	-0.930777	0.218296	1.21936e-06	2.61964e-05
WBGene00007283	clec-222	418.457	407.383	368.796	421.519	577.304	622.992	537.186	592.515	493.269	-0.51416	0.0818716	5.95088e-11	1.40394e-09																		WBGene00045468	F08A8.8	41.4679	13.1999	8.37788	48.6466	44.7136	21.3044	46.0073	16.9994	30.0896	-1.4451	0.341744	1.26917e-06	2.71961e-05
WBGene00044457	C18H7.11	249.585	330.623	285.164	240.257	131.969	153.824	160.46	156.827	213.588	0.84329	0.136721	6.29268e-11	1.47882e-09																		WBGene00005548	sri-36	8.27762	0	0	10.9851	8.45107	0	16.0296	0	5.46792	-6.40289	2.58017	1.28057e-06	2.7379e-05
WBGene00000731	col-158	34.071	32.9584	52.8073	48.0645	109.093	96.7971	143.874	110.14	78.4757	-1.37875	0.226182	6.87073e-11	1.6105e-09																		WBGene00020895	plpp-1.2	219.591	122.124	155.524	206.7	200.425	131.398	238.076	147.123	177.62	-0.586978	0.134315	1.28102e-06	2.7379e-05
WBGene00017089	poml-2	269.219	251.04	242.1	277.61	439.193	422.649	394.012	363.916	332.467	-0.618766	0.0997628	7.23815e-11	1.69226e-09																		WBGene00010998	R03G8.3	208.92	127.537	132.829	289.981	219.003	159.99	253.396	168.048	194.963	-0.66469	0.153585	1.32344e-06	2.82129e-05
WBGene00011231	R11A5.3	208.665	177.8	115.344	155.63	309.55	304.741	356.894	344.059	246.586	-0.962128	0.157633	7.63635e-11	1.78306e-09																		WBGene00019037	fbxb-17	96.497	164.971	138.542	83.519	90.0996	199.573	100.959	142.42	127.073	0.739563	0.172113	1.3508e-06	2.87223e-05
WBGene00015369	ugt-51	84.7706	58.2144	108.871	85.2143	187.672	166.817	265.507	211.396	146.058	-1.23676	0.203585	8.03171e-11	1.87057e-09																		WBGene00017771	F25B4.8	63.0497	114.451	143.859	71.7346	75.1101	122.8	70.7964	114.419	97.0275	0.750985	0.174733	1.35561e-06	2.87336e-05
WBGene00010706	cyp-14A2	102.349	94.0955	115.369	78.0323	177.654	187.239	196.935	199.959	143.954	-0.913892	0.149424	8.30271e-11	1.9312e-09																		WBGene00044396	ZK1290.14	169.665	118.844	110.382	190.043	199.431	137.378	199.065	91.2961	152.013	-0.669127	0.154746	1.35654e-06	2.87336e-05
WBGene00001758	gst-10	816.578	735.125	707.524	629.009	1185.65	1004.01	975.985	1216.92	908.851	-0.580546	0.0936162	8.34737e-11	1.93911e-09																		WBGene00017386	nspd-5	335.541	225.845	196.635	249.679	329.211	127.768	506.581	145.335	264.574	-0.940585	0.222128	1.36552e-06	2.8887e-05
WBGene00194926	K08D8.12	95.4495	82.3911	100.215	96.6516	13.6478	43.1523	24.922	27.5435	60.4965	1.70117	0.282097	9.03699e-11	2.09395e-09																		WBGene00000256	bli-6	345.541	669.777	587.84	288.185	422.746	446.629	378.532	565.444	463.087	0.609482	0.140345	1.39137e-06	2.93962e-05
WBGene00007257	C01H6.8	71.2041	86.3727	75.0421	70.3142	134.324	168.211	189.013	151.835	118.289	-1.03063	0.170172	1.02315e-10	2.35571e-09																		WBGene00018724	F53A9.1	212.029	166.453	156.347	234.293	300.196	176.427	299.386	142.069	210.9	-0.650284	0.150526	1.41263e-06	2.98075e-05
WBGene00020054	R13D7.2	180.156	187.038	164.106	157.466	294.398	288.184	255.684	304.017	228.881	-0.701832	0.114663	1.05237e-10	2.41686e-09																		WBGene00015110	B0281.3	361.169	219.953	297.201	404.738	347.977	233.508	338.21	230.658	304.177	-0.525467	0.119842	1.42756e-06	3.00459e-05
WBGene00007063	2L52.1	194.663	259.882	174.675	249.82	365.583	387.289	417.17	382.354	303.929	-0.789558	0.129786	1.07809e-10	2.46967e-09																		WBGene00012970	Y48A6B.9	246.075	156.154	175.574	267.98	246.223	173.473	302.283	197.742	220.688	-0.548991	0.125854	1.46751e-06	3.08085e-05
WBGene00006372	syx-2	233.932	231.685	282.678	253.035	144.058	151.068	150.764	140.002	198.403	0.746754	0.12239	1.10221e-10	2.51613e-09																		WBGene00014813	M176.9	42.5555	17.2554	19.221	45.1661	46.518	16.7092	77.3224	20.2331	35.6226	-1.38104	0.330314	1.47984e-06	3.09887e-05
WBGene00017730	F22H10.6	136.695	132.448	96.6628	96.4573	220.018	212.535	242.671	214.329	168.977	-0.903166	0.149474	1.23026e-10	2.79711e-09																		WBGene00013263	txdc-12.1	447.456	633.889	675.448	462.762	382.225	904.057	530.832	606.55	580.402	0.585181	0.135211	1.55971e-06	3.25425e-05
WBGene00016657	C44E12.1	165.876	134.706	157.607	120.203	243.039	287.108	237.974	286.393	204.113	-0.824931	0.136369	1.33356e-10	3.02439e-09																		WBGene00014247	ZK1307.4	116.625	84.7567	58.0412	109.308	127.103	36.7433	191.876	48.8051	96.6573	-1.14226	0.273752	1.55993e-06	3.25425e-05
WBGene00004811	skr-5	45.6107	72.2751	65.8083	72.6565	15.7356	13.9227	24.3905	11.4886	40.236	1.8861	0.316095	1.34931e-10	3.05558e-09																		WBGene00020544	fbxb-84	73.9336	135.788	134.791	78.3058	63.3966	214.89	81.8009	115.207	112.264	0.933006	0.221623	1.58503e-06	3.2983e-05
WBGene00022333	fbxa-27	113.035	130.761	102.359	105.851	52.3191	55.8944	37.6419	37.8996	79.4702	1.23853	0.206621	1.35067e-10	3.05558e-09																		WBGene00016064	acd-1	223.444	84.6599	66.394	245.935	179.84	39.7527	99.3392	96.7822	129.518	-1.25857	0.302606	1.58966e-06	3.30359e-05
WBGene00020921	W01C8.5	1397.06	1468.14	1123.48	1475.07	963.419	969.649	773.99	887.037	1132.23	0.580556	0.0948563	1.45396e-10	3.26082e-09																		WBGene00010486	K01H12.4	135.993	76.9796	74.6125	109.213	114.672	48.4519	178.712	61.6572	100.036	-0.947121	0.225723	1.61308e-06	3.34407e-05
WBGene00044811	F12E12.11	201.831	195.607	192.53	122.732	72.541	83.8259	83.0429	83.7398	129.481	1.09421	0.182578	1.48123e-10	3.31789e-09																		WBGene00010924	M153.1	178.462	217.764	220.39	139.505	150.942	244.134	150.305	259.329	195.104	0.562264	0.130102	1.72179e-06	3.55164e-05
WBGene00017312	pitr-5	200.463	156.249	250.245	189.568	86.0203	50.5928	101.766	82.7885	139.712	1.24976	0.209348	1.54772e-10	3.46254e-09																		WBGene00006039	ssp-10	327.129	234.747	197.257	297.076	287.281	125.883	418.032	116.853	250.532	-0.892992	0.213252	1.75186e-06	3.60918e-05
WBGene00015230	tag-344	165.933	153.147	142.985	104.551	53.1782	66.6784	65.2991	62.5614	101.792	1.14423	0.191401	1.55952e-10	3.48465e-09																		WBGene00023407	cex-1	228.063	160.6	150.786	211.109	243.625	166.558	241.569	125.368	190.96	-0.568171	0.131707	1.75891e-06	3.6192e-05
WBGene00019057	F58F9.3	475.979	525.139	507.077	555.223	243.466	298.924	309.322	375.551	411.335	0.719612	0.119106	1.60934e-10	3.58276e-09																		WBGene00016265	trhr-1	213.978	124.253	111.561	207.402	358.375	180.294	284.755	132.914	201.692	-0.872589	0.207932	1.77394e-06	3.64559e-05
WBGene00019961	R08E5.1	39.4537	18.789	23.8657	36.3258	89.835	88.208	89.8679	79.7728	58.2647	-1.49687	0.25269	1.72077e-10	3.82146e-09																		WBGene00009824	gpdh-1	85.151	222.129	286.058	110.128	155.404	327.584	193.433	264.733	205.577	0.92961	0.222291	1.78665e-06	3.66716e-05
WBGene00007691	C23H4.2	164.089	143.62	143.809	113.994	51.2531	62.4296	77.4339	60.7723	102.175	1.12043	0.188261	1.82415e-10	4.04115e-09																		WBGene00008782	sdz-14	100.653	159.471	152.21	104.628	78.5426	217.018	100.941	150.927	133.049	0.75939	0.179957	1.83743e-06	3.76674e-05
WBGene00015823	C16B8.3	654.255	586.915	589.656	705.548	435.525	424.611	423.492	465.176	535.647	0.512436	0.0839237	1.83016e-10	4.04953e-09																		WBGene00044811	F12E12.11	190.872	104.487	95.451	185.397	182.565	91.056	117.105	81.8304	131.095	-0.790748	0.187724	1.84655e-06	3.78076e-05
WBGene00011812	T16H12.2	98.2831	84.0509	86.1025	100.161	167.736	171.659	171.8	169.401	131.149	-0.851744	0.142357	1.88918e-10	4.16996e-09																		WBGene00011466	T05C12.1	44.6223	31.8938	20.9977	57.8203	62.3673	10.6574	72.2516	18.0692	39.8349	-1.4019	0.341566	1.98455e-06	4.05329e-05
WBGene00010630	ttll-15	165.167	178.541	180.37	178.808	293.824	262.621	311.958	273.043	230.541	-0.668788	0.110911	1.96047e-10	4.31161e-09																		WBGene00020223	T05A7.6	188.155	135.23	84.363	148.659	181.321	59.1515	252.161	73.3917	140.304	-1.0267	0.249763	2.17651e-06	4.40191e-05
WBGene00008900	F16H6.10	264.791	314.022	289.218	301.671	165.975	198.947	158.273	182.403	234.413	0.699199	0.116332	2.09452e-10	4.5787e-09																		WBGene00044694	fbxb-90	46.7044	97.8783	69.3178	44.9708	43.1105	113.365	41.2691	81.8475	67.3079	0.949883	0.229553	2.19467e-06	4.42783e-05
WBGene00015085	B0244.10	209.588	193.522	138.37	246.885	67.0892	101.587	75.7828	87.382	140.026	1.18199	0.200837	2.33771e-10	5.10418e-09																		WBGene00012087	T27E7.1	209.415	151.799	112.058	187.243	206.605	61.0083	297.887	67.9979	161.752	-1.08773	0.265494	2.21522e-06	4.46385e-05
WBGene00015430	C04E7.3	378.462	309.877	320.139	323.55	480.649	503.047	482.082	479.824	409.704	-0.528562	0.0873838	2.45495e-10	5.35374e-09																		WBGene00014240	htas-1	98.0468	50.6307	46.638	82.6711	75.1804	34.8096	146.53	41.3785	71.9856	-1.0957	0.267501	2.2309e-06	4.49e-05
WBGene00009518	clec-166	340.108	391.268	297.443	358.672	221.12	224.697	188.222	196.521	277.256	0.70597	0.118094	2.47053e-10	5.38124e-09																		WBGene00016577	clec-3	16.6174	2.19923	3.15628	21.1076	22.3062	1.93851	13.7288	1.06325	10.2646	-2.85352	0.679597	2.29355e-06	4.61049e-05
WBGene00008366	tpra-1	701.53	561.121	710.711	850.136	347.258	418.404	447.194	448.65	560.625	0.730326	0.122481	2.61598e-10	5.67765e-09																		WBGene00015716	sox-4	288.688	170.874	124.732	228.617	222.014	142.627	246.594	174.981	199.891	-0.62828	0.149205	2.34318e-06	4.69316e-05
WBGene00003729	nhx-1	121.139	123.241	79.623	99.595	235.216	217.427	182.523	214.024	159.098	-0.963658	0.163483	2.82209e-10	6.09585e-09																		WBGene00022181	pho-9	319.829	98.9686	92.5436	373.517	726.26	218.064	583.767	142.466	319.427	-1.67609	0.416334	2.36585e-06	4.73285e-05
WBGene00007340	C05D12.2	258.106	211.727	243.758	269.688	386.637	402.815	351.638	387.408	313.972	-0.615327	0.102815	2.85377e-10	6.15695e-09																		WBGene00020990	W03D8.9	289.203	183.851	180.214	241.102	243.583	96.5334	388.907	114.863	217.282	-0.922094	0.224426	2.38279e-06	4.76098e-05
WBGene00011554	T07A5.1	58.2579	38.7773	43.0585	34.8436	123.748	129.069	83.0017	127.759	79.8144	-1.33878	0.228635	2.9719e-10	6.40422e-09																		WBGene00013723	Y106G6H.13	138.506	84.7547	95.6003	123.96	158.645	69.6379	249.335	57.307	122.218	-1.01809	0.249113	2.44085e-06	4.87112e-05
WBGene00021263	Y22D7AR.10	512.44	549.282	476.222	545.405	824.581	775.176	648.092	835.288	645.811	-0.54776	0.0911893	3.00729e-10	6.4728e-09																		WBGene00003887	osm-7	348.219	312.959	273.238	366.09	427.448	248.935	463.997	235.806	334.587	-0.539704	0.127155	2.53852e-06	5.05994e-05
WBGene00010123	F55G11.2	52.7104	63.9492	73.928	31.2603	139.444	141.922	140.582	140.122	97.9897	-1.25458	0.213697	3.03808e-10	6.53133e-09																		WBGene00007337	C05C12.5	82.736	38.5168	30.1727	64.266	55.6805	25.1514	106.583	31.8402	54.3683	-1.17016	0.288472	2.56364e-06	5.10385e-05
WBGene00017592	F19C7.2	398.539	354.141	337.175	466.873	225.203	253.994	223.468	191.136	306.316	0.763669	0.129081	3.17065e-10	6.80024e-09																		WBGene00007794	C28D4.7	59.157	38.4917	33.6058	58.7375	77.756	18.4093	91.718	20.1959	49.7589	-1.24866	0.308238	2.58833e-06	5.14066e-05
WBGene00019546	glct-6	319.446	277.836	270.717	312.802	189.562	171.018	173.558	190.809	238.218	0.667766	0.112291	3.26349e-10	6.99111e-09																		WBGene00012604	nspe-2	99.4228	50.415	49.3719	75.6142	93.7724	48.4272	127.496	48.7674	74.1609	-0.910502	0.222259	2.60988e-06	5.17106e-05
WBGene00001703	grd-14	173.19	182.937	226.89	162.807	331.593	353.554	326.709	286.236	255.489	-0.754906	0.127557	3.33398e-10	7.13369e-09																		WBGene00017905	F28F5.6	236.819	132.061	166.436	254.314	358.09	212.815	302.42	135.85	224.851	-0.758588	0.183382	2.63958e-06	5.22366e-05
WBGene00022329	fbxa-79	189.918	178.253	187.661	191.211	100.022	112.878	110.703	97.8273	146.059	0.792356	0.134188	3.36253e-10	7.18631e-09																		WBGene00014158	ZK938.1	286.484	207.85	150.229	251.467	235.537	112.402	412.562	103.111	219.955	-0.95042	0.233209	2.67215e-06	5.27954e-05
WBGene00019043	fbxc-26	36.27	33.9283	17.0609	28.8381	80.6722	81.7407	95.1777	81.9436	56.9539	-1.48501	0.255493	3.39914e-10	7.25603e-09																		WBGene00021207	ptp-5.3	78.9411	39.5854	32.6239	54.145	67.6786	26.1714	94.9268	26.5825	52.5818	-1.1221	0.276623	2.67419e-06	5.27954e-05
WBGene00219316	F21A3.11	421.581	527.764	493.979	502.943	283.836	301.327	324.153	349.695	400.66	0.603755	0.101208	3.41085e-10	7.27249e-09																		WBGene00004811	skr-5	43.3709	29.7189	20.7494	68.8791	62.745	24.1772	69.7059	26.5243	43.2338	-1.15659	0.28482	2.69044e-06	5.30529e-05
WBGene00001787	gst-39	322.445	312.198	322.479	317.205	205.357	217.866	211.67	204.648	264.234	0.580141	0.0971127	3.41982e-10	7.28306e-09																		WBGene00010900	M28.9	144.624	97.5417	85.1815	129.899	142.225	51.2374	225.123	68.5445	118.047	-0.983523	0.241982	2.72608e-06	5.36918e-05
WBGene00044537	B0238.15	114.323	123.624	114.696	104.369	51.0052	49.519	61.91	47.3488	83.3493	1.07652	0.184212	3.68903e-10	7.838e-09																		WBGene00013080	Y51A2D.13	1146.52	679.588	830.341	1283.77	1812.57	920.104	1591.8	885.818	1143.81	-0.744225	0.180638	2.83718e-06	5.56813e-05
WBGene00020693	lron-8	296.471	305.412	276.535	246.552	422.846	433.257	405.237	419.446	350.72	-0.554553	0.0928409	3.70765e-10	7.86836e-09																		WBGene00000684	col-110	7.26377	28.5946	25.1944	6.4245	6.16007	40.6911	14.911	36.1377	20.6722	1.7584	0.438411	2.84951e-06	5.58571e-05
WBGene00009818	acbp-3	543.289	616.555	505.408	528.475	397.282	385.559	350.422	357.887	460.61	0.535599	0.0897712	4.17405e-10	8.82721e-09																		WBGene00020350	T08B2.12	844.199	513.89	453.001	713.347	812.396	315.392	1181.61	306.799	642.579	-1.05059	0.26001	2.89135e-06	5.65982e-05
WBGene00018351	F42G2.2	485.709	431.677	557.455	475.501	277.672	319.196	319.783	337.185	400.522	0.614254	0.103622	4.18175e-10	8.83323e-09																		WBGene00017851	F27C1.1	468.771	283.776	268.362	431.378	480.046	166.594	730.686	187.023	377.079	-1.10362	0.274748	3.07959e-06	6.00121e-05
WBGene00015217	tes-1	570.28	605.432	827.095	799.33	420.2	399.286	432.555	436.884	561.383	0.699255	0.118864	4.50036e-10	9.47319e-09																		WBGene00011173	acs-18	92.5085	65.967	47.4413	82.5893	122.178	26.1804	140.387	42.544	77.4744	-1.14649	0.286606	3.25987e-06	6.33019e-05
WBGene00017748	F23F1.7	111.374	100.468	104.785	108.618	178.815	179.16	225.01	191.464	149.961	-0.824888	0.141127	4.5273e-10	9.51885e-09																		WBGene00020004	R11E3.2	110.131	35.1853	38.9644	99.1107	79.1888	54.2885	93.7103	57.4243	71.0004	-0.936262	0.231828	3.30576e-06	6.40429e-05
WBGene00020710	T23B3.2	388.051	442.746	438.798	482.037	283.783	304.21	288.646	298.539	365.851	0.552608	0.0932432	4.89134e-10	1.02605e-08																		WBGene00006052	ssq-3	197.237	122.068	86.1667	142.252	149.309	55.2345	271.525	56.3413	135.017	-1.12759	0.282388	3.33015e-06	6.444e-05
WBGene00022743	mlt-7	802.739	824.43	741.828	661.782	1168.45	1145.83	948.832	1091.86	923.218	-0.503372	0.0845825	4.93724e-10	1.03448e-08																		WBGene00000986	dhs-23	58.1187	25.2942	11.5521	43.1343	67.7535	27.1294	56.1755	19.1326	38.5363	-1.29741	0.324552	3.35951e-06	6.49322e-05
WBGene00009431	dct-17	335.109	303.742	288.749	487.563	192.776	190.38	154.939	152.865	263.265	0.979729	0.169716	5.74791e-10	1.19881e-08																		WBGene00013999	ZK550.5	220.046	163.861	114.501	174.375	227.079	83.3309	350.709	82.913	177.102	-1.02045	0.25474	3.38236e-06	6.52976e-05
WBGene00008782	sdz-14	106.476	110.434	82.8631	105.834	216.578	190.273	246.873	164.811	153.018	-0.966348	0.167723	6.09416e-10	1.26666e-08																		WBGene00255375	F08B4.8	390.429	277.382	224.256	297.013	348.612	162.414	554.617	154.925	301.206	-0.867868	0.215137	3.43992e-06	6.63316e-05
WBGene00011829	T19A6.4	303.264	264.601	251.036	275.218	134.791	139.804	194.795	133.056	212.071	0.823932	0.142535	6.52239e-10	1.3495e-08																		WBGene00020070	rmd-6	123.368	74.7995	75.4021	113.815	116.409	39.7037	190.927	60.5605	99.3729	-1.0102	0.25285	3.46755e-06	6.67866e-05
WBGene00011445	T04F8.7	148.425	200.445	155.884	153.601	73.0178	87.0196	79.5051	90.3555	123.532	0.948649	0.164947	7.17108e-10	1.47698e-08																		WBGene00007867	C32H11.4	129.765	182.551	249.063	100.953	135.45	198.654	121.43	177.531	161.925	0.665516	0.161942	3.48185e-06	6.69842e-05
WBGene00019146	H02F09.3	146.754	120.455	88.5664	99.4598	45.6881	53.86	33.1706	36.9771	78.1165	1.34739	0.236508	7.38139e-10	1.51686e-08																		WBGene00019973	R09A1.3	205.456	103.381	122.815	233.118	316.483	181.17	217.945	97.7833	184.769	-0.858692	0.21251	3.51685e-06	6.75008e-05
WBGene00022324	fbxa-26	121.825	121.08	110.484	135.915	61.4935	65.5707	47.605	52.8822	89.6069	1.04427	0.182501	7.67378e-10	1.57338e-08																		WBGene00004875	smd-1	690.093	1068.69	882.139	581.801	481.866	772.762	651.945	817.869	743.396	0.517197	0.12383	3.67229e-06	7.03212e-05
WBGene00021178	Y9C9A.8	109.942	95.9837	84.4927	66.0739	37.5768	33.3455	24.3461	31.7182	60.4348	1.40714	0.247006	7.78066e-10	1.5935e-08																		WBGene00001523	gbh-2	237.818	142.952	201.963	305.603	436.934	222.921	373.046	181.811	262.881	-0.77495	0.192254	4.00472e-06	7.61587e-05
WBGene00043065	C55C3.7	48.2388	37.7551	29.2445	37.3146	100.132	92.4043	86.3753	94.3275	65.7239	-1.23745	0.217519	8.03046e-10	1.64096e-08																		WBGene00000039	acn-1	121.686	181.825	163.074	133.852	65.8277	360.226	98.9779	251.171	172.08	1.0708	0.27069	4.16165e-06	7.88714e-05
WBGene00007867	C32H11.4	137.352	106.617	142.985	127.391	215.477	316.176	221.357	246.725	189.26	-0.90916	0.158684	8.11629e-10	1.65663e-08																		WBGene00011918	T22C1.8	84.4949	46.2345	58.0347	88.204	83.1039	26.2107	107.462	33.0101	65.8443	-1.04023	0.263168	4.26843e-06	8.0697e-05
WBGene00017251	fbxb-105	27.4616	28.1034	26.8093	38.4661	103.639	81.7223	85.2287	66.0912	57.1903	-1.41047	0.249008	8.60772e-10	1.75104e-08																		WBGene00019565	cyp-35A3	90.3812	24.1903	27.3731	86.2638	88.4261	26.1735	43.44	42.5347	53.5978	-1.22983	0.312342	4.27259e-06	8.0697e-05
WBGene00013197	ttm-5	400.168	430.461	382.654	482.956	270.38	262.456	273.343	297.801	350.028	0.588803	0.10129	8.73696e-10	1.77138e-08																		WBGene00009102	F25B3.5	103.801	46.9102	73.1639	91.7955	143.764	62.8212	153.336	59.9534	91.9431	-0.921251	0.231739	4.29894e-06	8.10099e-05
WBGene00022683	ZK185.3	88.909	59.0904	49.5553	57.7294	154.179	191.345	136.169	130.44	108.427	-1.20204	0.212174	8.93605e-10	1.80972e-08																		WBGene00010574	K04H4.5	134.816	92.3931	76.5146	114.729	138.706	58.1125	189.595	76.5077	110.172	-0.839226	0.211791	4.78428e-06	8.94434e-05
WBGene00015632	C09D4.1	384.903	421.567	368.078	463.979	589.462	649.014	564.672	582.182	502.982	-0.52423	0.089882	9.00856e-10	1.82082e-08																		WBGene00045412	C25F9.12	14.4582	1.09823	0	15.5741	20.0481	0.965539	13.845	2.1189	8.51351	-3.55351	0.855282	4.79993e-06	8.96348e-05
WBGene00008255	C51E3.10	227.564	208.383	261.647	203.006	119.103	126.611	135.518	134.177	177.001	0.77279	0.134419	9.0109e-10	1.82082e-08																		WBGene00003434	msp-38	329.06	226.766	198.81	264.585	282.289	115.04	410.854	133.677	245.135	-0.842747	0.213436	5.03088e-06	9.35258e-05
WBGene00020665	T22B2.1	339.69	303.975	333.134	360.811	459.804	518.035	634.735	500.12	431.288	-0.630235	0.109061	9.36621e-10	1.88842e-08																		WBGene00016742	C48B6.4	65.4714	39.5816	30.5588	64.2371	73.016	27.1476	87.9326	39.3503	53.4119	-0.982369	0.250672	5.22579e-06	9.68233e-05
WBGene00016865	ets-9	302.795	257.789	294.389	310.172	200.204	182.258	149.443	154.194	231.405	0.727264	0.126517	9.49235e-10	1.90961e-08																		WBGene00012240	W04A8.5	130.765	206.756	199.523	150.515	133.959	240.288	163.956	223.215	181.122	0.543401	0.133663	5.481e-06	0.000101099
WBGene00018343	F42A10.7	493.77	429.024	486.558	469.325	860.526	689.94	599.637	794.877	602.957	-0.621627	0.107664	9.57408e-10	1.92392e-08																		WBGene00194695	B0462.5	77.6544	34.1099	17.744	67.9328	56.3697	24.1956	64.6402	37.1671	47.4767	-1.11149	0.286115	5.49866e-06	0.000101212
WBGene00008576	F08G2.4	554.245	518.574	572.634	539.806	320.026	360.36	423.437	378.606	458.461	0.540646	0.0929544	9.83918e-10	1.97283e-08																		WBGene00019406	acdh-8	219.126	166.044	116.761	176.203	232.313	75.5993	289.51	105.259	172.602	-0.889183	0.227126	5.49934e-06	0.000101212
WBGene00009023	F21G4.1	426.896	418.482	475.505	431.122	247.063	332.851	284.375	270.527	360.853	0.605119	0.104772	1.04708e-09	2.09484e-08																		WBGene00013473	Y69E1A.1	256.381	185.855	127.115	181.717	259.4	93.9907	336.931	120.119	195.189	-0.878042	0.224524	5.65241e-06	0.000103914
WBGene00000971	dhs-7	86.8615	123.136	95.0546	94.9003	203.45	166.733	190.338	192.949	144.178	-0.867687	0.152539	1.11581e-09	2.22745e-08																		WBGene00017135	EEED8.4	193.728	299.243	264.463	213.878	200.621	372.7	195.927	270.853	251.427	0.538677	0.132559	5.66218e-06	0.000103978
WBGene00018374	tag-343	294.257	237.259	243.819	261.649	139.893	153.275	175.762	134.726	205.08	0.746269	0.131187	1.26997e-09	2.5241e-08																		WBGene00050904	Y70C5A.3	113.297	139.63	167.625	97.2718	101.431	163.87	89.0263	165.922	129.759	0.609132	0.151617	5.75991e-06	0.000105422
WBGene00007521	C11E4.7	289.144	347.091	236.417	216.243	544.409	512.012	409.458	495.157	381.241	-0.807257	0.142379	1.30612e-09	2.59311e-08																		WBGene00018926	F56A11.6	59.1987	45.0843	24.1975	59.6519	73.073	17.4465	105.257	20.2017	50.5138	-1.32366	0.344688	5.80772e-06	0.000106063
WBGene00005001	spp-16	315.834	317.372	343.559	320.434	489.591	451.226	495.654	432.583	395.781	-0.502992	0.0869348	1.31808e-09	2.61399e-08																		WBGene00016757	C49A9.3	171.476	130.839	135.941	225.747	183.688	109.561	219.247	130.814	163.414	-0.600678	0.149763	5.89679e-06	0.000107335
WBGene00077757	E02H4.7	110.999	119.574	130.784	94.3524	214.438	201.445	206.25	191.62	158.683	-0.785591	0.138405	1.37313e-09	2.71429e-08																		WBGene00011910	alg-3	180.884	136.948	95.7116	156.375	176.637	71.4105	277.312	87.991	147.909	-0.911621	0.234391	5.95228e-06	0.000108226
WBGene00013329	Y57G11C.40	42.5189	32.8179	35.7354	30.2077	90.4423	88.9911	77.6035	87.3906	60.7134	-1.21667	0.217101	1.41299e-09	2.79003e-08																		WBGene00044898	let-383	93.1989	135.628	163.237	85.702	57.6911	128.317	64.8871	122.496	106.395	0.789015	0.200964	6.0569e-06	0.000109887
WBGene00023492	T24D3.2	76.7592	75.2164	84.4904	58.8335	132.34	190.16	148.833	150.661	114.662	-1.01002	0.179808	1.43597e-09	2.83234e-08																		WBGene00007793	C28D4.5	100.697	58.2846	48.3408	83.5156	76.9609	35.8545	140.907	39.3331	72.9867	-1.02406	0.265754	6.30882e-06	0.000113958
WBGene00009271	glna-3	433.985	381.409	366.431	380.327	253.478	266.961	266.581	266.859	327.004	0.542992	0.0945126	1.47671e-09	2.90953e-08																		WBGene00013086	arrd-2	152.593	208.947	208.042	134.911	137.001	223.841	136.35	187.093	173.597	0.518284	0.127935	6.31621e-06	0.000113967
WBGene00004814	skr-8	351.7	342.032	232.313	301.659	542.744	550.417	698.28	455.242	434.298	-0.829897	0.147343	1.51503e-09	2.97535e-08																		WBGene00044073	tag-244	133.931	70.5238	32.3672	142.189	102.43	72.6792	111.649	56.6466	90.3018	-0.976913	0.253373	6.41836e-06	0.000115558
WBGene00010340	slcf-1	492.333	505.617	536.239	553.118	321.211	395.05	352.866	376.954	441.674	0.509628	0.0886431	1.61898e-09	3.17264e-08																		WBGene00017840	ttm-2	234.581	159.462	171.233	272.576	302.51	187.98	220.044	159.449	213.479	-0.555601	0.138356	6.63671e-06	0.00011923
WBGene00017131	E04F6.15	228.397	217.032	255.904	241.677	339.453	347.269	375.261	357.801	295.349	-0.562703	0.0983719	1.63913e-09	3.20521e-08																		WBGene00013965	ZK287.4	11.3479	32.661	35.9801	14.0197	7.78633	28.4502	10.7781	36.7379	22.2202	1.45951	0.383058	6.69704e-06	0.00012011
WBGene00006902	vet-6	876.551	739.918	546.01	731.355	1462.02	1485.01	1732.92	1206.34	1097.52	-0.971588	0.174407	1.84848e-09	3.58755e-08																		WBGene00016958	ilys-4	146.148	102.303	75.3673	141.352	198.942	118.132	196.783	75.4293	131.807	-0.793661	0.203487	6.7002e-06	0.00012011
WBGene00021913	cec-8	349.454	399.561	211.63	254.84	634.951	551.031	648.562	529.745	447.472	-0.911771	0.163381	1.86392e-09	3.61366e-08																		WBGene00022112	Y71F9AL.7	69.4993	136.384	92.2943	64.2468	40.8289	153.048	58.5597	97.7697	89.0788	0.944396	0.244911	6.77216e-06	0.000121269
WBGene00020900	T28F2.1	59.2923	43.599	52.8055	40.8822	12.8447	16.1267	12.1767	11.4568	31.148	1.80257	0.325829	1.92412e-09	3.72639e-08																		WBGene00001577	gem-4	523.781	371.626	368.832	541.426	670.962	468.3	522.997	306.296	471.778	-0.529253	0.131531	6.82575e-06	0.000122097
WBGene00018100	math-26	532.516	475.786	429.819	552.734	685.782	670.88	784.083	777.529	613.641	-0.533095	0.0937532	2.0443e-09	3.94653e-08																		WBGene00021464	ugt-31	140.262	87.963	93.7265	144.995	148.382	63.0136	127.992	42.5366	106.109	-0.874214	0.226259	7.0426e-06	0.000125569
WBGene00014144	ZK899.6	116.535	102.769	98.304	85.297	182.389	176.406	202.516	170.927	141.893	-0.815518	0.14597	2.10575e-09	4.05652e-08																		WBGene00004815	skr-9	199.858	331.185	275.654	254.284	161.357	457.811	221.539	349.39	281.385	0.689584	0.175727	7.06259e-06	0.00012579
WBGene00010475	K01F9.2	170.057	183.039	184.408	191.29	90.89	121.45	94.1107	98.7206	141.745	0.807892	0.144559	2.11421e-09	4.06852e-08																		WBGene00015094	B0261.6	115.873	75.3971	73.4507	105.135	133.85	70.6039	202.527	54.0356	103.859	-0.919298	0.239025	7.10238e-06	0.000126363
WBGene00000051	acr-12	170.052	166.325	146.365	165.549	86.4619	81.5559	100.342	85.3629	125.252	0.832358	0.149514	2.26161e-09	4.33837e-08																		WBGene00018153	F37C12.10	73.3431	35.2234	24.905	66.1189	60.4038	34.8167	73.1704	36.0728	50.5067	-0.947899	0.246279	7.19262e-06	0.000127674
WBGene00045245	ttr-34	586.493	600.32	674.917	789.088	445.794	439.584	422.378	463.451	552.753	0.554432	0.0980217	2.4254e-09	4.633e-08																		WBGene00011957	T23F11.6	65.1977	27.5131	35.4356	61.5083	101.223	48.3778	149.145	27.6033	64.5004	-1.28025	0.337499	7.19918e-06	0.000127674
WBGene00022261	clec-210	8.79086	6.78488	10.5614	4.80707	30.2574	43.0178	37.6303	49.3445	23.8993	-2.20851	0.400784	2.4765e-09	4.72068e-08																		WBGene00012819	Y43F8B.9	93.1916	34.1093	52.1976	82.62	125.082	53.232	96.9434	58.4069	74.4729	-0.907666	0.235316	7.21534e-06	0.000127812
WBGene00015587	lido-2	73.6577	74.6523	59.3073	62.4717	125.566	137.682	156.038	125.112	101.811	-0.956978	0.173254	2.51418e-09	4.78748e-08																		WBGene00021113	gsp-3	257.408	148.465	120.799	160.609	187.825	97.8645	356.458	96.7312	178.27	-0.942607	0.24626	7.378e-06	0.000130148
WBGene00086569	F38A6.5	133.247	112.076	116.969	136.349	225.77	196.345	227.222	201.157	168.642	-0.738214	0.132786	2.71226e-09	5.14848e-08																		WBGene00016599	C42D8.1	222.34	165.558	138.653	214.677	202.055	116.145	206.516	137.45	175.424	-0.550043	0.13824	7.59768e-06	0.000133537
WBGene00017705	F22E5.6	17.481	32.8556	24.3686	36.1913	1.84246	1.07306	3.32505	0.882191	14.7524	3.76219	0.672009	2.90082e-09	5.4721e-08																		WBGene00018646	mul-1	46.6256	15.9977	10.5997	52.0462	33.702	12.6571	24.4592	7.71577	25.4754	-1.56531	0.416436	7.60236e-06	0.000133537
WBGene00015390	C03F11.4	144.007	131.237	145.862	165.626	260.659	270.641	216.681	234.848	196.195	-0.711752	0.128958	3.60634e-09	6.7539e-08																		WBGene00011176	R09E10.6	815.685	499.299	369.596	591.05	821.515	262.566	1037.78	286.985	585.559	-1.07694	0.284261	7.83977e-06	0.000137271
WBGene00009842	igeg-2	119.655	128.844	187.661	156.339	77.0829	73.1013	53.1378	61.6933	107.189	1.09829	0.201844	3.74964e-09	6.98626e-08																		WBGene00010870	let-522	296.364	203.283	186.544	265.911	330.965	245.794	324.708	171.109	253.085	-0.541665	0.136092	7.87591e-06	0.000137758
WBGene00194717	ZC239.22	54.459	64.6344	60.1014	82.2234	18.4739	21.4364	13.3055	27.3674	42.7502	1.58277	0.292653	3.88439e-09	7.21512e-08																		WBGene00003653	nhr-63	49.8263	21.9944	12.6085	63.3254	114.681	43.6053	97.3935	26.5757	53.7513	-1.45395	0.386562	7.90143e-06	0.000138058
WBGene00020386	cyp-34A4	434.867	438.551	601.228	530.485	271.893	292.738	356.222	294.192	402.522	0.691025	0.126149	4.8169e-09	8.88364e-08																		WBGene00018124	F36H12.10	37.3833	26.3915	19.9819	64.2412	50.0062	11.6302	48.0725	13.8214	33.941	-1.3269	0.351455	7.92261e-06	0.000138282
WBGene00003983	pes-10	262.937	253.139	234.798	306.199	416.778	420.695	492.376	362.947	343.734	-0.649188	0.118469	4.97174e-09	9.15063e-08																		WBGene00019273	H43E16.1	305.419	259.378	198.63	354.443	279.032	206.63	329.258	186.396	264.898	-0.525983	0.132175	8.15132e-06	0.000141975
WBGene00018334	cyp-33E2	318.144	347.333	303.863	300.065	214.233	223.852	195.815	200.829	263.017	0.578093	0.104804	5.11142e-09	9.38868e-08																		WBGene00017058	msrp-6	70.903	60.3692	34.003	82.9198	93.446	20.3163	119.18	29.7072	63.8556	-1.20336	0.320564	8.46535e-06	0.000146981
WBGene00019622	K10C2.7	126.16	129.215	109.966	150.572	60.2758	68.5578	62.0733	64.4631	96.4103	0.953206	0.176664	5.22015e-09	9.5787e-08																		WBGene00016189	C28G1.4	180.94	230.865	259.64	184.442	108.286	425.768	136.784	256.374	222.887	0.850702	0.22272	8.58507e-06	0.000148655
WBGene00010585	K05C4.9	103.597	124.262	82.8752	106.738	196.653	170.117	221.2	191.976	149.677	-0.857858	0.158684	5.3417e-09	9.79186e-08																		WBGene00044693	fbxb-92	37.3437	72.591	70.2733	32.1234	25.4211	79.431	36.741	54.1989	51.0154	0.973283	0.256807	8.70039e-06	0.000150275
WBGene00015860	C16D9.5	10.9997	12.6073	10.5618	12.0092	49.4706	40.8832	40.9407	41.4056	27.3598	-1.79342	0.336453	6.06133e-09	1.10331e-07																		WBGene00003977	pes-2.1	755.344	1093.22	1065.2	719.55	492.877	1604.3	695.32	1118.09	942.987	0.788736	0.206442	9.29753e-06	0.000159425
WBGene00017051	afmd-1	113.024	113.319	104.796	105.859	167.986	212.82	189.321	186.858	149.248	-0.749828	0.138771	6.48885e-09	1.17876e-07																		WBGene00010158	pes-2.2	755.344	1093.22	1065.2	719.55	492.877	1604.3	695.32	1118.09	942.987	0.788736	0.206442	9.29753e-06	0.000159425
WBGene00010924	M153.1	188.761	147.228	159.226	157.572	261.592	248.302	254.635	278.517	211.979	-0.646997	0.11893	6.50155e-09	1.17989e-07																		WBGene00004778	ser-3	253.614	191.305	196.082	254.192	302.761	202.654	368.678	182.938	244.028	-0.55299	0.140762	9.3119e-06	0.000159506
WBGene00020329	bath-26	53.805	72.667	47.9312	40.8807	11.9267	15.0519	17.7114	15.8631	34.4796	1.72763	0.325915	6.74357e-09	1.22016e-07																		WBGene00013215	Y54G11A.4	65.4646	39.5824	33.7111	69.7438	80.7122	44.5973	93.6711	36.1582	57.9551	-0.898956	0.237427	9.5948e-06	0.000163844
WBGene00044792	F59C6.14	144.272	137.663	132.661	148.473	79.2863	77.4024	54.35	76.9524	106.383	0.908394	0.169496	6.85219e-09	1.23734e-07																		WBGene00017335	F10D2.10	298.928	227.647	199.585	383.626	365.639	291.657	390.833	239.171	299.636	-0.534869	0.13594	9.79864e-06	0.00016698
WBGene00022562	ZC204.12	109.64	111.332	108.855	81.8481	191.068	200.93	164.997	182.482	143.894	-0.79339	0.148038	8.01199e-09	1.42972e-07																		WBGene00022326	fbxa-14	152.684	127.554	96.8111	184.461	169.973	74.6356	153.27	90.3792	131.221	-0.693681	0.181059	1.01671e-05	0.000172903
WBGene00012005	jun-1	1086.51	1097.61	1435.97	1310.19	683.699	740.249	853.714	931.17	1017.39	0.591121	0.109098	8.4946e-09	1.51287e-07																		WBGene00019262	dmsr-12	13.8676	1.45055	1.36736	17.4162	14.1914	2.19031	27.8984	5.59252	10.4968	-2.54863	0.687657	1.04809e-05	0.000177692
WBGene00019788	M116.1	147.048	139.474	75.5508	108.261	253.345	226.798	250.211	225.637	178.291	-0.970962	0.183519	8.68004e-09	1.53986e-07																		WBGene00017343	F10E7.1	32.2107	52.7771	65.3047	37.6251	19.9875	86.2833	28.5636	65.9338	48.5857	1.07355	0.288197	1.05372e-05	0.000178283
WBGene00019791	sdz-25	147.048	139.474	75.5508	108.261	253.345	226.798	250.211	225.637	178.291	-0.970962	0.183519	8.68004e-09	1.53986e-07																		WBGene00018543	ugt-32	87.2651	137.445	256.89	105.535	112.262	226.837	136.034	189.28	156.444	0.791533	0.209658	1.1024e-05	0.000185382
WBGene00016896	nep-4	272.852	315.22	300.607	332.604	196.931	218.421	186.99	187.638	251.408	0.598828	0.110704	8.69585e-09	1.54116e-07																		WBGene00011911	T22B3.3	53.8457	28.6076	20.8807	36.7199	54.8179	15.4859	72.701	18.0533	37.639	-1.23849	0.335973	1.12276e-05	0.000188615
WBGene00017253	sdz-9	101.103	105.655	94.2404	111.758	191.618	174.227	234.632	163.011	147.03	-0.839431	0.157765	8.71591e-09	1.54321e-07																		WBGene00007354	C06A1.3	63.3314	45.0872	37.8414	64.2423	82.3382	31.0108	113.38	30.8299	58.5076	-1.03203	0.278231	1.12855e-05	0.000189396
WBGene00000699	col-125	186.476	129.76	246.958	210.568	80.8045	97.7972	81.9355	96.0802	141.297	1.0541	0.199611	9.08274e-09	1.60191e-07																		WBGene00011445	T04F8.7	141.547	97.5259	102.659	191.583	149.06	79.6504	147.792	104.06	126.735	-0.651446	0.170448	1.14191e-05	0.000190865
WBGene00020148	T01D1.3	188.329	163.494	186.019	185.527	270.369	320.031	260.314	285.704	232.473	-0.620087	0.115277	9.69482e-09	1.69996e-07																		WBGene00007405	C07A9.9	239.728	189.161	165.905	228.527	227.895	139.519	246.533	147.745	198.127	-0.50629	0.129512	1.15759e-05	0.000193095
WBGene00020215	T04G9.4	392.359	353.816	301.408	348.471	510.637	516.248	534.55	466.994	428.06	-0.517791	0.0956273	1.03735e-08	1.81198e-07																		WBGene00013696	Y106G6A.4	160.528	99.0197	77.3026	94.5493	162.865	48.3967	253.746	59.4756	119.485	-1.10282	0.300527	1.21504e-05	0.000201864
WBGene00022736	ZK418.7	245.07	243.3	219.353	249.95	148.524	161.323	128.383	153.317	193.652	0.6552	0.122445	1.05692e-08	1.84438e-07																		WBGene00007159	B0379.7	142.122	99.8517	75.7378	105.364	146.942	50.5739	207.266	49.9348	109.724	-1.0013	0.271578	1.22454e-05	0.00020324
WBGene00044280	W02A2.9	75.6455	98.7981	128.391	149.143	32.5708	36.5451	43.0107	53.3503	77.1817	1.35688	0.259789	1.0584e-08	1.84518e-07																		WBGene00013526	Y73F8A.20	35.3262	23.0902	15.7977	42.2137	43.8212	13.5723	62.8484	15.9514	31.5776	-1.26875	0.346088	1.22763e-05	0.000203548
WBGene00020237	phat-4	327.801	272.997	261.575	333.426	180.055	204.148	139.53	170.142	236.209	0.738671	0.138982	1.07225e-08	1.86754e-07																		WBGene00007301	C04F12.7	617.309	391.672	281.065	488.348	538.71	200.371	817.554	246.407	447.679	-1.01264	0.27511	1.24497e-05	0.000206012
WBGene00017135	EEED8.4	204.487	225.254	211.196	204.977	366.402	352.073	416.644	275.19	282.028	-0.695035	0.130477	1.07894e-08	1.87739e-07																		WBGene00015516	C06A8.6	66.4462	35.19	34.6881	60.5713	53.0964	22.289	80.167	24.4513	47.1124	-1.0282	0.278967	1.24685e-05	0.000206116
WBGene00012755	Y41C4A.8	220.02	206.997	203.078	224.127	123.255	137.449	134.045	134.038	172.876	0.655266	0.122852	1.1539e-08	2.00016e-07																		WBGene00006680	twk-28	94.5502	38.4836	37.9151	79.8389	68.422	39.7477	66.2753	41.4738	58.3383	-0.867054	0.232943	1.26487e-05	0.000208679
WBGene00017771	F25B4.8	66.3761	75.3513	78.8608	73.8716	126.622	128.069	170.657	148.088	108.487	-0.901641	0.171371	1.1686e-08	2.02178e-07																		WBGene00020353	T08B6.4	186.04	138.533	90.6449	137.65	191.356	75.629	278.565	90.4028	148.602	-0.897295	0.242607	1.27605e-05	0.000210104
WBGene00021542	Y43B11AL.1	89.1032	108.621	60.9335	91.2659	198.789	160.309	199.168	158.573	133.345	-0.980475	0.187454	1.19737e-08	2.06566e-07																		WBGene00020713	T23B3.5	100.54	55.0021	43.9594	64.2517	87.1368	36.7949	135.803	41.4328	70.6151	-1.00214	0.272561	1.28041e-05	0.000210613
WBGene00010495	K02B12.2	135.88	140.336	94.2309	116.793	226.077	191.22	248.082	218.651	171.409	-0.816355	0.155171	1.24496e-08	2.14369e-07																		WBGene00002881	let-756	160.009	111.052	75.8318	160.595	236.784	134.755	234.243	109.534	152.851	-0.784787	0.210065	1.28673e-05	0.000211443
WBGene00021448	Y39D8A.1	419.206	417.001	346.241	393.174	269.915	260.207	244.472	182.498	316.589	0.682533	0.128802	1.28965e-08	2.21645e-07																		WBGene00010651	K08C9.2	131.679	100.097	65.9991	119.32	125.639	45.517	210.397	60.5638	107.402	-0.986821	0.268729	1.30127e-05	0.000213197
WBGene00044694	fbxb-90	49.4194	47.4792	45.4943	43.2814	90.8166	87.0907	119.548	108.395	73.9406	-1.05937	0.203215	1.31224e-08	2.251e-07																		WBGene00015860	C16D9.5	10.3859	29.6896	39.9803	11.9304	9.99923	56.2172	11.4404	21.2651	23.8635	1.55684	0.428499	1.33416e-05	0.00021837
WBGene00011672	cyp-13A5	413.939	514.223	850.656	728.53	152.886	171.121	256.658	233.417	415.179	1.52231	0.295336	1.38224e-08	2.36439e-07																		WBGene00013771	Y113G7C.1	143.536	111.03	74.9801	122.042	145.109	57.2282	195.927	69.153	114.876	-0.855522	0.231368	1.34187e-05	0.000219415
WBGene00021741	Y50D4B.2	169.461	148.682	130.389	159.705	90.0779	84.0037	77.2537	73.5254	116.637	0.848946	0.162144	1.41485e-08	2.41561e-07																		WBGene00013698	Y106G6D.1	136.001	215.541	182.879	163.36	114.664	271.338	147.757	232.814	183.044	0.622819	0.164292	1.37394e-05	0.000224217
WBGene00044692	fbxb-91	95.5482	85.2707	70.6787	66.1225	149.521	154.83	195.924	136.594	119.311	-0.941933	0.181438	1.5657e-08	2.65323e-07																		WBGene00021472	Y39G10AR.16	127.502	86.901	43.9736	84.4438	119.507	44.5434	184.079	32.9351	90.4856	-1.15848	0.319432	1.39119e-05	0.000226808
WBGene00017249	fbxb-108	24.2083	23.2796	18.6865	28.8147	65.0251	57.0296	74.1295	60.7824	43.9945	-1.3599	0.264513	1.60243e-08	2.7104e-07																		WBGene00021865	fbxa-66	26.9948	13.1962	10.5126	41.2985	45.3991	17.4439	40.079	12.7574	25.9602	-1.34051	0.368269	1.41333e-05	0.00023019
WBGene00010790	sodh-1	2060.56	2135.05	2300.81	2915.41	1083.2	1196.19	1330.14	1502.17	1815.44	0.831355	0.159456	1.6566e-08	2.79682e-07																		WBGene00007758	C27A7.8	12.4007	48.4335	44.6452	19.2838	23.2251	57.0652	27.8566	50.9249	35.4794	1.14032	0.312822	1.41785e-05	0.000230699
WBGene00011432	sdz-30	460.279	495.847	272.992	367.209	984.881	855.679	1014.41	762.754	651.756	-1.10855	0.215303	1.67359e-08	2.82027e-07																		WBGene00012947	Y47H9C.1	93.4308	58.2845	53.5956	93.6109	76.9607	47.483	117.994	39.3331	72.5866	-0.836764	0.226602	1.42082e-05	0.000230957
WBGene00013845	fbxa-37	158.004	153.025	206.342	184.058	82.6204	73.0879	87.4655	112.821	132.178	0.918563	0.176951	1.71037e-08	2.87424e-07																		WBGene00045400	C54D10.13	39.2639	23.1124	25.9483	52.3432	61.9493	25.1473	65.0194	19.0969	38.9851	-1.0898	0.299018	1.46819e-05	0.000238189
WBGene00022142	Y71G12B.2	97.6454	93.9404	90.9852	102.262	44.0679	53.739	35.4299	25.5616	67.9539	1.20309	0.234598	1.82336e-08	3.05847e-07																		WBGene00011231	R11A5.3	197.789	227.755	242.263	168.908	109.626	360.054	148.836	270.816	215.756	0.737411	0.198488	1.48743e-05	0.000240839
WBGene00009617	F41E7.1	221.405	256.217	237.246	211.156	142.75	149.629	140.48	149.722	188.576	0.63681	0.121608	2.09327e-08	3.47909e-07																		WBGene00009948	F52H3.6	125.604	84.6786	76.7023	95.4469	158.552	46.5124	201.66	66.9708	107.016	-0.960995	0.264119	1.51554e-05	0.000244672
WBGene00017861	F27D9.2	346.798	413.328	303.864	351.653	222.455	231.394	234.53	228.13	291.519	0.594697	0.11336	2.13826e-08	3.54412e-07																		WBGene00000878	cyn-2	279.666	187.033	155.7	200.112	253.133	130.679	403.535	159.318	221.147	-0.753602	0.204162	1.55102e-05	0.000249913
WBGene00017751	F23F12.3	99.0913	78.5931	91.8095	117.613	171.181	166.823	168.151	181.445	134.338	-0.791061	0.153271	2.21951e-08	3.6721e-07																		WBGene00022813	ZK742.3	384.346	271.596	263.145	354.235	491.395	289.834	474.532	337.076	358.27	-0.50436	0.131511	1.57643e-05	0.000253734
WBGene00020022	gldc-1	7530.24	6409.9	5453.83	6246.66	11125	11106.7	9122.64	9574.69	8321.21	-0.639309	0.122617	2.25677e-08	3.73035e-07																		WBGene00017481	F15B10.3	187.392	237.673	243.15	175.341	157.541	357.114	152.4	235.738	218.294	0.611313	0.162349	1.57779e-05	0.000253734
WBGene00020194	T03G6.1	31.8846	50.4331	17.0724	27.6623	0	4.30451	5.53786	2.64535	17.4425	3.16791	0.623896	2.40151e-08	3.96238e-07																		WBGene00011076	scav-5	355.36	215.506	180.119	298.248	244.459	133.788	313.049	213.754	244.285	-0.634236	0.169441	1.58025e-05	0.000253882
WBGene00019598	K09H9.7	342.046	352.374	327.375	334.635	249.877	223.487	229.229	237.143	287.021	0.502648	0.0953435	2.49317e-08	4.10243e-07																		WBGene00010808	sepa-1	833.627	1268.76	1118.6	807.539	593.204	1748.28	713.32	1123.17	1025.81	0.749612	0.202979	1.62587e-05	0.000260959
WBGene00009789	F46F2.5	85.6836	84.3121	74.7413	86.5465	143.073	188.179	135.037	152.449	118.753	-0.851394	0.16619	2.50786e-08	4.12288e-07																		WBGene00003096	lys-7	4560.6	2046.89	2675.9	5192.1	4080.28	3319.44	3900.46	2694.94	3558.83	-0.650959	0.174718	1.64865e-05	0.000263848
WBGene00020611	T20D4.5	60.5972	61.1503	64.9994	71.9734	119.851	119.499	136.048	116.249	93.7958	-0.871387	0.170431	2.63084e-08	4.31724e-07																		WBGene00011475	T05D4.2	134.96	237.536	179.716	156.936	87.7319	340.138	123.711	200.92	182.706	0.832253	0.228318	1.70153e-05	0.000271764
WBGene00017840	ttm-2	248.247	287.814	319.275	230.801	141.246	173.12	174.886	160.382	216.971	0.708957	0.137488	2.72886e-08	4.47404e-07																		WBGene00010869	M05B5.1	95.5405	69.2771	43.125	99.1146	80.0044	30.0455	111.006	42.5284	71.3302	-0.941755	0.262633	1.89166e-05	0.000299268
WBGene00017785	F25E5.4	40.7342	58.2145	48.7482	51.6085	150.137	146.369	91.8212	93.3663	85.1248	-1.19016	0.235636	2.77939e-08	4.54921e-07																		WBGene00000372	cyp-13A7	24.9184	6.59319	0	20.1767	21.5151	1.93761	18.2765	6.37636	12.4742	-2.22043	0.62534	1.95803e-05	0.000308297
WBGene00010150	F56D5.6	749.781	895.229	997.194	791.714	523.963	681.005	489.72	562.46	711.383	0.579506	0.111504	2.88663e-08	4.71146e-07																		WBGene00013806	Y116A8C.29	85.2352	46.0762	55.6014	113.392	96.6243	51.2718	105.23	68.9619	77.7992	-0.760023	0.208869	1.95764e-05	0.000308297
WBGene00077593	C49G7.12	69.7926	82.278	92.0725	71.7811	34.6933	34.0958	31.9245	35.0603	56.4622	1.14607	0.226505	2.9407e-08	4.7911e-07																		WBGene00007716	fbxa-82	51.3466	28.0308	13.3742	60.4284	47.7969	14.4033	37.8249	21.4448	34.3312	-1.20644	0.340307	1.97139e-05	0.000309575
WBGene00016912	clec-86	147.193	155.409	147.007	149.818	74.7464	102.932	57.6494	68.851	112.951	0.92094	0.181285	2.96498e-08	4.82633e-07																		WBGene00005012	F26F4.2	83.8356	44.0189	47.9584	87.2195	76.4817	29.0281	128.28	56.2732	69.1369	-0.95725	0.268076	1.97176e-05	0.000309575
WBGene00012622	Y38H6C.9	47.0096	78.0439	92.3348	92.7567	34.122	23.5455	15.3149	11.6946	49.3528	1.75198	0.350381	3.00989e-08	4.89066e-07																		WBGene00009488	oac-20	416.802	270.465	286.746	440.477	617.045	327.738	428.027	366.94	394.28	-0.548676	0.146484	1.97651e-05	0.000310028
WBGene00007362	cyp-35C1	483.116	481.139	451.727	346.952	640.121	628.427	631.745	653.617	539.605	-0.506167	0.096801	3.0256e-08	4.9118e-07																		WBGene00013559	Y75B8A.28	350.876	149.561	125.049	399.224	532.583	281.988	474.299	197.727	313.913	-1.07698	0.303713	1.97938e-05	0.000310185
WBGene00022559	fbxb-20	52.6834	54.2451	43.8685	37.2853	109.216	89.2206	127.314	93.4245	75.9072	-1.07806	0.213689	3.11154e-08	5.03348e-07																		WBGene00015089	B0252.5	76.7574	48.3945	19.9252	55.9867	64.713	27.122	103.353	25.5047	52.7195	-1.15757	0.327474	1.98428e-05	0.000310365
WBGene00015716	sox-4	299.08	236.32	229.389	253.209	148.305	180.127	141.135	132.035	202.45	0.717211	0.140364	3.28588e-08	5.30118e-07																		WBGene00003446	msp-53	761.514	513.975	387.148	625.364	737.197	286.293	1122.75	328.891	595.391	-0.972095	0.272966	1.99744e-05	0.000312129
WBGene00009696	F44F1.4	139.808	135.829	151.932	138.029	230.71	195.871	266.617	239.584	187.298	-0.679119	0.132438	3.35996e-08	5.41589e-07																		WBGene00012115	T28B8.4	96.741	71.4537	53.8731	85.3366	118.222	34.9207	175.37	54.2607	86.2722	-1.01615	0.286121	2.01773e-05	0.000315001
WBGene00044167	C36A4.11	82.5248	74.2433	128.113	103.039	42.0224	34.0062	38.3893	43.3973	68.2169	1.20544	0.240388	3.40226e-08	5.47921e-07																		WBGene00022324	fbxa-26	115.173	58.29	73.4688	114.724	104.732	74.5974	129.641	71.2101	92.7296	-0.658864	0.179628	2.06733e-05	0.000321834
WBGene00044903	K03H1.13	52.1074	76.0855	73.4027	59.6155	114.661	130.348	129.977	147.833	98.0036	-0.930138	0.184069	3.50583e-08	5.641e-07																		WBGene00003468	msp-113	967.107	590.07	490.503	765.595	831.64	348.053	1275.88	324.646	699.187	-1.00005	0.282285	2.11344e-05	0.000328088
WBGene00044607	K02A11.4	246.879	214.866	229.23	255.801	139.997	155.282	137.525	160.755	192.542	0.632633	0.123211	3.56056e-08	5.724e-07																		WBGene00009344	F32H2.7	179.654	114.363	83.0903	122.976	142.319	60.0904	226.603	83.9928	126.636	-0.86348	0.242154	2.16742e-05	0.000335525
WBGene00008498	F01D5.8	267.273	305.769	277.024	304.227	171.966	210.282	180.418	193.26	238.777	0.579774	0.112551	3.69895e-08	5.90987e-07																		WBGene00010999	R03G8.4	101.873	183.605	209.846	118.377	116.785	154.181	128.938	172.31	148.239	0.566135	0.152804	2.20787e-05	0.000341467
WBGene00195189	ZC449.8	70.7717	75.2323	55.2317	74.9709	142.283	127.537	127.532	124.491	99.7563	-0.871391	0.172827	3.72391e-08	5.94451e-07																		WBGene00009682	msd-2	585.384	369.817	288.581	415.59	572.749	230.021	801.336	228.13	436.451	-0.962233	0.272201	2.21917e-05	0.000342895
WBGene00004815	skr-9	210.84	267.66	169.767	231.643	365.763	359.459	471.061	338.769	301.87	-0.757042	0.149612	3.91388e-08	6.23681e-07																		WBGene00017955	F31E8.5	60.249	41.784	32.6301	61.4863	63.8274	22.295	93.7625	29.7733	50.7259	-1.00906	0.285679	2.22167e-05	0.000342962
WBGene00022265	Y73C8C.8	217.273	229.197	191.755	230.149	340.049	328.486	399.196	294.964	278.884	-0.616196	0.120469	3.95778e-08	6.29571e-07																		WBGene00008964	mltn-9	144.52	84.6532	79.1247	126.634	134.426	96.9779	130.009	76.5879	109.117	-0.597235	0.162628	2.33564e-05	0.000359113
WBGene00013906	ugt-5	190.427	202.707	239.197	235.606	305.971	322.861	351.415	336.829	273.127	-0.567562	0.110349	4.0117e-08	6.37591e-07																		WBGene00009028	F21H7.2	84.2229	52.1307	43.0813	67.2456	90.9898	25.9832	108.492	47.1383	64.9105	-0.937094	0.265258	2.3461e-05	0.000360156
WBGene00015859	C16D9.4	193.48	229.769	249.415	206.643	128.32	136.604	119.52	145.378	176.141	0.692424	0.13603	4.07526e-08	6.47125e-07																		WBGene00003983	pes-10	248.242	355.171	299.907	239.523	222.271	471.078	291.667	384.91	314.096	0.540669	0.145934	2.35512e-05	0.000360871
WBGene00021719	fbxb-104	53.8188	62.0177	38.1829	51.6929	129.332	84.9444	129.507	118.086	83.4476	-1.09897	0.220923	4.25466e-08	6.73846e-07																		WBGene00002090	ins-7	67.3503	54.8621	36.6175	97.6136	91.7225	45.1405	110.317	53.0423	69.5832	-0.847506	0.238248	2.35817e-05	0.000361005
WBGene00016204	gsto-1	323.049	286.376	298.12	354.156	205.053	196.539	220.429	214.272	262.249	0.558762	0.108896	4.34897e-08	6.88182e-07																		WBGene00011968	T23G11.1	186.345	128.747	113.7	137.709	200.803	82.2611	303.745	103.002	157.039	-0.843818	0.237789	2.36685e-05	0.000361331
WBGene00044680	F30A10.13	77.377	64.5554	80.7569	66.8272	153.712	135.516	119.408	135.391	104.193	-0.851897	0.169699	4.50375e-08	7.102e-07																		WBGene00009982	F53F1.4	1024.28	1701.75	1229.06	789.723	687.322	1291.21	709.811	1194.79	1078.49	0.675016	0.186364	2.36467e-05	0.000361331
WBGene00016542	C39H7.4	782.032	807.812	650.767	613.696	483.738	525.014	393.922	486.301	592.91	0.564249	0.110127	4.51477e-08	7.1132e-07																		WBGene00022162	Y71G12B.27	65.9505	24.2108	29.9859	39.5383	53.5699	18.3665	75.7104	25.4642	41.5996	-1.10457	0.31565	2.37744e-05	0.000362615
WBGene00015537	C06E4.8	69.029	73.5512	54.4263	68.6361	26.6537	24.7072	23.2583	29.0953	46.1696	1.25615	0.25387	4.84142e-08	7.59493e-07																		WBGene00001570	gei-13	49.909	76.9566	109.736	58.7285	49.1578	114.437	51.3104	82.9722	74.151	0.782596	0.218712	2.39945e-05	0.000365299
WBGene00018278	F41C6.4	25.2795	33.4589	16.8328	44.2907	86.5995	65.7446	85.3744	93.3302	56.3638	-1.39186	0.283512	4.8676e-08	7.62941e-07																		WBGene00019015	F57F4.1	71.6715	45.0832	41.045	67.9106	73.0604	32.9569	105.214	40.4057	59.6684	-0.877349	0.247738	2.40916e-05	0.000366441
WBGene00011217	R10E11.5	64.8932	89.6641	78.4004	74.4294	132.183	164.926	125.929	170.819	112.656	-0.885429	0.177602	5.06112e-08	7.91907e-07																		WBGene00007305	ttbk-5	59.1822	35.1896	19.975	55.0645	49.2452	23.2588	74.4276	27.6413	42.998	-1.02429	0.291847	2.41407e-05	0.00036685
WBGene00001713	grl-4	254.124	271.901	290.812	245.697	442.196	343.71	505.074	395.897	343.676	-0.626242	0.123569	5.13215e-08	8.01639e-07																		WBGene00003705	nhr-115	124.608	70.3778	89.3865	122.976	119.25	62.996	108.744	54.2218	94.07	-0.698031	0.193466	2.41799e-05	0.000367108
WBGene00009658	F43G6.5	167.414	163.039	154.372	142.78	299.25	268.03	292.027	205.211	211.515	-0.714492	0.142596	5.61826e-08	8.71573e-07																		WBGene00009202	aptf-4	299.282	388.123	337.157	248.69	220.599	509.004	262.695	341.383	325.867	0.555639	0.150711	2.42106e-05	0.000367239
WBGene00007963	cyp-25A1	255.339	285.206	212.865	154.857	391.001	520.84	354.034	436.029	326.271	-0.846704	0.170454	5.68255e-08	8.80796e-07																		WBGene00017060	D2063.1	39.4381	17.5962	34.6562	55.0664	65.438	18.4093	89.4242	24.4477	43.0595	-1.22011	0.350777	2.42805e-05	0.000367961
WBGene00008598	spin-3	52.8432	60.1544	60.1228	26.4047	138.238	92.556	130.542	129.48	86.2926	-1.19805	0.243884	5.89901e-08	9.10462e-07																		WBGene00004216	ptr-1	88.3819	134.124	120.292	92.6808	86.7927	152.261	83.2331	144.67	112.805	0.585807	0.159645	2.43654e-05	0.000368388
WBGene00008784	F14B6.3	180.333	228.829	158.425	225.827	337.23	292.598	376.243	313.647	264.142	-0.69532	0.139002	5.95567e-08	9.18427e-07																		WBGene00022419	Y102A11A.9	107.824	45.5107	57.1755	86.6449	107.611	60.2266	101.012	66.491	79.0619	-0.72433	0.201662	2.48699e-05	0.000375178
WBGene00019956	fbxb-75	85.7133	89.1741	42.2456	60.0872	160.452	126.904	210.286	163.893	117.344	-1.17476	0.240245	6.04616e-08	9.31591e-07																		WBGene00005818	srw-71	12.4572	7.69798	6.30504	20.1906	50.0257	9.69031	60.719	5.31524	21.5501	-2.01007	0.585508	2.53451e-05	0.000381304
WBGene00001536	gcy-9	37.5129	25.2556	47.1269	27.5628	95.9519	85.0958	75.1881	84.5205	59.7768	-1.20837	0.24649	6.33234e-08	9.73208e-07																		WBGene00015051	B0218.7	124.541	86.8813	59.8598	94.5307	113.17	36.8186	159.361	48.8952	90.5072	-0.953848	0.272638	2.55421e-05	0.000383919
WBGene00017481	F15B10.3	197.676	184.553	165.742	159.34	252.607	312.257	322.063	255.928	231.271	-0.649599	0.129663	6.39425e-08	9.80236e-07																		WBGene00003452	msp-59	1112.69	711.084	574.491	853.736	1103.75	394.459	1592.32	457.284	849.977	-0.991243	0.284337	2.57895e-05	0.000387041
WBGene00018204	F39F10.4	59.0906	62.8623	37.3661	39.7721	106.728	125.621	113.006	96.126	80.0715	-1.07213	0.219601	6.94632e-08	1.0595e-06																		WBGene00013900	ugt-18	16.6237	2.19908	4.21244	16.5184	16.914	5.81664	26.2841	1.06342	11.204	-2.1838	0.624185	2.60242e-05	0.000390104
WBGene00020015	nhr-210	190.188	171.602	167.36	163.389	109.986	110.79	96.279	96.9178	138.314	0.697747	0.140858	7.95921e-08	1.20389e-06																		WBGene00012683	asp-17	174.406	117.669	96.6847	203.741	171.62	136.635	336.789	120.126	169.709	-0.803487	0.227213	2.61216e-05	0.00039121
WBGene00008477	clec-17	19.7939	18.4233	20.3109	27.6266	0.916339	2.15151	1.10658	2.64306	11.6215	3.38152	0.679093	7.9725e-08	1.2049e-06																		WBGene00019388	K04F1.9	140.759	94.7364	85.3582	149.788	141.418	91.977	142.674	103.539	118.781	-0.553353	0.150877	2.64871e-05	0.000396325
WBGene00015610	C08F1.6	142.541	114.241	79.6103	105.916	210.347	181.594	253.582	203.636	161.433	-0.885993	0.181419	7.99043e-08	1.2056e-06																		WBGene00012107	T27F6.8	155.733	67.6482	84.1353	118.739	177.441	115.434	181.499	87.5794	123.526	-0.738279	0.207349	2.68007e-05	0.000400295
WBGene00013306	Y57G11C.8	336.984	363.606	352.541	377.259	229.128	260.89	257.045	185.204	295.332	0.587912	0.117933	8.48538e-08	1.27498e-06																		WBGene00010254	F58E6.5	150.472	86.8829	83.9929	110.134	122.423	65.8827	227.07	74.4027	115.157	-0.853785	0.243522	2.72872e-05	0.000407194
WBGene00018021	F34D6.1	46.2192	38.8009	31.6859	40.8187	89.7474	72.0961	89.6177	95.1362	63.0153	-1.07342	0.221635	8.55192e-08	1.28353e-06																		WBGene00008477	clec-17	18.6924	7.69748	2.10357	17.4368	19.2322	2.90761	26.3223	4.25281	12.3307	-1.98894	0.575401	2.77886e-05	0.000413558
WBGene00015879	C17B7.5	48.5191	43.6986	58.5013	52.7492	95.0817	101.231	118.326	99.499	77.2008	-0.950524	0.195189	8.55638e-08	1.28353e-06																		WBGene00007231	C01G10.4	14.2326	3.25481	5.18474	16.6141	10.262	2.91783	63.9444	1.06123	14.684	-2.66959	0.782959	2.82709e-05	0.000420359
WBGene00016003	C18H9.5	110.09	118.368	185.243	141.625	245.349	236.771	318.61	246.629	200.336	-0.848591	0.173585	8.61744e-08	1.29162e-06																		WBGene00011378	T02E1.6	69.49	39.5962	29.3563	40.3842	74.737	14.5289	96.4895	18.0651	47.8309	-1.28738	0.377383	2.90834e-05	0.000431664
WBGene00010426	H37A05.2	75.8671	76.597	55.2455	68.4719	27.493	25.8168	27.6654	30.8365	48.4991	1.20624	0.249823	8.87737e-08	1.32948e-06																		WBGene00014116	ZK858.2	144.13	113.295	75.4401	115.648	156.458	43.5816	249.439	55.2527	119.156	-1.06316	0.309332	2.91834e-05	0.000432373
WBGene00018724	F53A9.1	222.339	245.139	313.95	311.164	167.807	152.249	167.26	170.154	218.758	0.688943	0.139614	8.92232e-08	1.33511e-06																		WBGene00008074	nkb-2	55.0265	46.1868	37.8429	68.8309	80.7975	28.1037	92.7609	23.3883	54.1172	-1.00226	0.28914	2.9613e-05	0.000437565
WBGene00022866	ZK1240.1	34.0655	37.8021	24.3725	28.8419	1.83374	3.22637	2.21353	10.5738	17.8662	2.56144	0.534026	1.09826e-07	1.62866e-06																		WBGene00021542	Y43B11AL.1	84.1283	162.742	114.688	102.784	57.686	216.148	86.94	141.414	120.816	0.834623	0.239276	3.04806e-05	0.000448413
WBGene00022484	fbxa-77	204.869	211.929	194.147	215.561	126.848	150.384	103.004	117.266	165.501	0.686567	0.140538	1.13807e-07	1.68493e-06																		WBGene00271815	K04A8.21	10.2389	1.09451	0	22.8959	10.8328	0	13.946	1.05597	7.50801	-4.22427	1.10761	3.11159e-05	0.000457323
WBGene00006272	str-245	53.7963	57.1598	41.4318	39.6829	11.0108	21.5014	14.3911	10.5757	31.1937	1.62937	0.34351	1.15356e-07	1.70327e-06																		WBGene00003431	msp-33	694.191	438.126	306.4	509.044	608.033	242.656	971.97	254.621	503.13	-1.02179	0.298216	3.13212e-05	0.000459858
WBGene00018437	btb-8	142.818	153.126	69.0547	103.369	281.54	247.33	257.892	208.843	182.996	-1.0168	0.212675	1.16256e-07	1.71143e-06																		WBGene00003470	msp-152	783.941	517.35	363.355	584.35	732.886	282.293	1051.2	291.753	575.891	-0.980064	0.28563	3.19946e-05	0.000468575
WBGene00017250	F08D12.7	146.005	133.689	141.355	140.703	215.644	216.081	238.012	203.587	179.384	-0.598535	0.12186	1.21187e-07	1.77969e-06																		WBGene00021531	Y42G9A.1	201.389	123.168	139.757	189.976	243.206	157.951	214.243	150.952	177.58	-0.514509	0.141162	3.20717e-05	0.000468875
WBGene00018730	F53A9.7	113.334	172.439	162.742	191.885	61.2474	76.0254	90.9454	86.5384	119.395	0.956294	0.200021	1.28614e-07	1.88571e-06																		WBGene00013801	Y116A8C.24	25.7765	14.6259	9.40569	35.5174	33.5705	12.5067	38.5593	10.8807	22.6053	-1.30592	0.382538	3.22785e-05	0.000471483
WBGene00011486	T05E12.3	120.56	131.637	149.471	140.858	215.937	194.456	240.32	220.407	176.706	-0.638954	0.131002	1.32601e-07	1.94103e-06																		WBGene00001904	his-30	818.305	1274.93	1128.85	921.824	634.176	1668.71	767.892	1145.08	1044.97	0.652582	0.183987	3.2384e-05	0.000471776
WBGene00019703	fbxb-41	59.2433	71.6645	32.4947	76.9992	131.29	136.495	146.15	127.809	97.7681	-1.10234	0.232933	1.34474e-07	1.96687e-06																		WBGene00001907	his-33	818.305	1274.93	1128.85	921.824	634.176	1668.71	767.892	1145.08	1044.97	0.652582	0.183987	3.2384e-05	0.000471776
WBGene00020364	T08E11.8	28.6187	30.0745	19.4992	34.8102	3.66244	8.6093	3.31899	2.64254	16.4045	2.44933	0.517851	1.353e-07	1.97736e-06																		WBGene00001603	gln-2	218.056	155.052	135.646	164.275	212.35	80.4398	356.028	101	177.856	-0.887686	0.257484	3.2384e-05	0.000471776
WBGene00000072	add-1	575.46	532.698	454.771	544.736	379.42	405.705	306.438	320.885	440.014	0.543731	0.11058	1.37037e-07	1.9966e-06																		WBGene00138721	pals-37	31.0902	14.421	6.30683	55.8109	49.798	15.6534	43.2419	24.3902	30.0891	-1.37124	0.404343	3.26197e-05	0.000474375
WBGene00018398	sptl-2	2360.35	2176.96	1975.47	2417.84	1291.11	1469.77	871.675	1011.26	1696.81	0.882457	0.183995	1.37525e-07	2e-06																		WBGene00013087	Y51B9A.5	31.9367	17.6092	16.5326	46.8938	31.8325	8.70012	44.2912	13.7952	26.4489	-1.27136	0.374498	3.32391e-05	0.000482534
WBGene00005649	srp-8	88.9734	102.722	114.549	103.38	50.445	50.5383	56.4506	51.992	77.3812	0.908145	0.189823	1.38121e-07	2.00567e-06																		WBGene00006056	sss-1	560.179	369.551	273.781	455.232	531.504	187.926	840.346	224.238	430.345	-1.0318	0.302921	3.33853e-05	0.000484233
WBGene00021397	Y38C1AA.6	106.624	132.813	155.986	148.985	64.1651	86.0466	63.0812	66.082	102.973	0.902835	0.189289	1.46516e-07	2.11743e-06																		WBGene00007232	C01G10.5	16.3234	4.36957	2.06226	11.0787	15.6917	4.84159	59.7369	3.17759	14.6602	-2.44326	0.72746	3.37592e-05	0.000488374
WBGene00044166	C54C6.7	76.5164	99.3393	92.9061	120.301	34.3317	29.9981	58.6894	37.9492	68.7539	1.18504	0.251501	1.49869e-07	2.16245e-06																		WBGene00018375	F43C9.1	62.3063	37.3879	35.7583	87.1844	79.2393	37.7984	53.7933	22.327	51.9744	-0.95785	0.278769	3.40054e-05	0.000491506
WBGene00010242	F58D5.2	103.091	92.2942	111.878	93.743	184.16	152.4	163.015	178.201	134.848	-0.706135	0.146837	1.61247e-07	2.31742e-06																		WBGene00016707	C46E10.1	54.9981	28.5946	26.2453	41.3003	50.8195	22.2834	73.4042	13.8174	38.9328	-1.11263	0.327826	3.46998e-05	0.000499363
WBGene00021865	fbxa-66	28.578	43.6234	47.933	42.0539	11.0002	9.68003	7.74691	14.9788	25.6993	1.74832	0.372256	1.6268e-07	2.33616e-06																		WBGene00020357	T08E11.1	55.0838	24.1884	6.32388	60.566	48.416	9.69597	49.093	29.7796	35.3933	-1.4059	0.419288	3.49914e-05	0.000502831
WBGene00016407	C34D10.2	573.055	577.198	769.641	596.646	380.759	361.849	434.31	475.312	521.097	0.574268	0.117978	1.64468e-07	2.35624e-06																		WBGene00015217	tes-1	538.192	393.634	401.236	572.639	782.655	545.795	761.093	441.318	554.57	-0.517393	0.143108	3.54679e-05	0.00050865
WBGene00020940	W02D7.4	139.117	166.434	134.034	145.728	235.339	228.786	231.49	213.377	186.788	-0.59803	0.12351	1.72363e-07	2.46353e-06																		WBGene00021381	Y37E11B.10	149.44	107.562	86.6327	116.789	147.522	46.36	240.564	60.5899	119.433	-0.980698	0.288717	3.56989e-05	0.000509853
WBGene00018966	F56D2.5	177.283	228.031	272.992	230.407	129.06	129.159	132.747	144.448	180.516	0.718162	0.149838	1.73959e-07	2.48439e-06																		WBGene00001108	dsl-6	14.5258	32.9945	41.9783	26.616	13.092	91.0653	11.4739	43.5757	34.4152	1.45772	0.434216	3.57058e-05	0.000509853
WBGene00009354	ilkp-1	203.074	226.681	190.91	222.491	295.498	331.098	343.186	286.436	262.422	-0.543127	0.111807	1.82722e-07	2.59931e-06																		WBGene00018548	clec-79	95.5988	49.478	48.4594	81.6736	62.2639	39.7497	158.785	35.0947	71.3879	-1.0526	0.309919	3.69325e-05	0.000526463
WBGene00000722	col-149	1336.13	935.874	1104.04	1575.28	600.084	665.469	383.023	497.059	887.12	1.11888	0.23922	1.84705e-07	2.62168e-06																		WBGene00001839	hdl-1	64.4617	35.1806	31.6495	56.8935	55.3069	20.3653	55.8817	23.4018	42.8926	-0.944033	0.277304	3.79134e-05	0.000537669
WBGene00021585	clec-74	2.19943	0	4.87299	3.60122	21.9772	21.5109	24.334	24.658	12.8942	-2.85058	0.60173	1.8618e-07	2.64025e-06																		WBGene00007097	B0024.4	199.347	159.454	94.6138	287.254	270.855	111.447	540.49	109.501	221.62	-1.26139	0.378997	3.83771e-05	0.000543315
WBGene00007460	C08F11.13	683.339	663.581	889.245	878.007	494.634	428.866	535.544	581.959	644.397	0.573301	0.118473	1.92204e-07	2.72142e-06																		WBGene00007222	C01F6.2	59.2185	40.6833	40.0125	70.6626	85.3446	40.7154	81.1511	35.0919	56.61	-0.813752	0.236893	3.91164e-05	0.000550974
WBGene00008810	cyp-13A12	133.227	96.06	138.121	103.209	51.2613	50.5856	73.0124	38.7549	85.5288	1.06842	0.229132	2.05754e-07	2.90422e-06																		WBGene00011795	T16A9.5	231.837	134.001	120.103	147.14	159.655	67.3135	293.594	86.3429	154.998	-0.901969	0.26573	3.91177e-05	0.000550974
WBGene00044410	F48E8.8	21.8564	25.1279	25.9931	32.5691	86.5769	69.7549	79.7955	46.7533	48.5534	-1.31705	0.284698	2.14054e-07	3.01201e-06																		WBGene00022650	ZK84.2	55.9653	24.2013	23.0207	35.7976	58.6122	19.3648	58.7112	25.4961	37.6462	-1.03536	0.306716	3.94756e-05	0.000554601
WBGene00001905	his-31	1153.4	1262.96	827.366	979.455	1437.91	1565.26	1663.5	1478.21	1296.01	-0.511451	0.105796	2.25496e-07	3.15834e-06																		WBGene00020200	T04A6.1	227.252	129.81	130.302	182.358	165.735	135.903	197.416	95.4332	158.026	-0.578212	0.163525	3.97316e-05	0.000557724
WBGene00045412	C25F9.12	15.2733	16.4155	21.1216	14.4961	0.922544	0	0	0	8.52865	5.39787	1.32993	2.4735e-07	3.4459e-06																		WBGene00023424	C53D6.10	43.4818	30.8096	19.826	51.4091	57.922	17.4199	73.8979	29.7324	40.5623	-1.06144	0.316275	4.06611e-05	0.000570288
WBGene00008246	C50H2.13	137.647	138.178	149.46	144.777	67.2561	69.7457	99.7542	81.1635	110.998	0.790101	0.168701	2.55436e-07	3.55574e-06																		WBGene00011425	T04B2.7	35.2959	18.6951	23.1194	48.641	47.7159	21.3188	49.2604	12.7567	32.1004	-1.0933	0.325047	4.09236e-05	0.000573484
WBGene00015110	B0281.3	382.147	427.295	367.203	354.686	282.559	279.542	210.32	252.925	319.585	0.544397	0.113623	2.63387e-07	3.65243e-06																		WBGene00020105	R148.7	77.7508	57.1999	43.9819	68.8396	82.4907	28.0828	117.325	27.6238	62.9118	-0.99817	0.297765	4.17898e-05	0.000583647
WBGene00003702	nhr-112	142.814	152.154	128.36	144.238	57.7767	55.9173	73.0516	97.8131	106.516	0.918665	0.19772	2.64008e-07	3.65825e-06																		WBGene00016399	C34D4.3	147.588	103.466	92.2478	124.919	143.376	77.3572	266.275	53.0537	126.035	-0.927932	0.275899	4.21004e-05	0.00058749
WBGene00018523	lact-1	101.143	87.2564	210.419	147.769	277.709	253.852	344.168	331.281	219.2	-1.05292	0.228801	2.79908e-07	3.86971e-06																		WBGene00001852	hil-1	113.052	61.594	76.5389	115.645	110.948	81.3626	127.499	68.0103	94.3313	-0.617572	0.176518	4.24379e-05	0.000591204
WBGene00019328	clec-149	158.001	157.866	160.849	179.249	250.619	242.908	257.969	228.287	204.469	-0.546792	0.114621	2.82355e-07	3.8917e-06																		WBGene00019041	fbxc-22	23.8824	47.2854	52.5763	20.1902	20.0039	45.5503	22.8955	42.5264	34.3638	0.978956	0.290669	4.25332e-05	0.000592034
WBGene00044396	ZK1290.14	178.75	199.773	209.546	207.867	125.545	81.4809	135.245	114.762	156.621	0.746302	0.15992	3.01627e-07	4.13848e-06																		WBGene00020003	R11E3.1	127.829	95.655	82.1986	116.544	135.267	76.596	202.114	73.3838	113.698	-0.726015	0.211972	4.3584e-05	0.00060441
WBGene00020760	T24C4.4	425.869	431.218	515.735	431.673	76.6667	111.469	153.013	223.353	296.125	1.54452	0.340958	3.04361e-07	4.17285e-06																		WBGene00021581	clec-70	18.6947	5.49807	3.15637	22.0253	20.7675	8.72337	24.0245	1.06326	12.9941	-1.90323	0.572037	4.395e-05	0.000608177
WBGene00007182	fbxb-119	58.1402	43.5773	43.0553	46.9248	96.4098	80.604	131.759	101.368	75.2298	-1.0195	0.222306	3.05974e-07	4.18864e-06																		WBGene00009031	F21H7.5	423.498	292.529	237.425	390.967	426.43	169.571	692.187	152.009	348.077	-1.03038	0.310253	4.47515e-05	0.000617719
WBGene00023503	F17C11.13	106.762	111.982	110.634	98.2829	57.1653	46.0096	67.6093	52.8604	81.4132	0.87395	0.188942	3.06901e-07	4.19816e-06																		WBGene00011120	R07E5.15	94.3841	62.6938	50.3281	76.1791	87.0622	44.5559	135.536	44.6319	74.4213	-0.836619	0.248062	4.52925e-05	0.000623338
WBGene00019865	R04A9.6	50.5993	40.7316	33.3103	36.0273	82.4502	80.691	91.8398	83.6919	62.4177	-1.00197	0.218388	3.12728e-07	4.26183e-06																		WBGene00015879	C17B7.5	45.747	94.5478	85.4535	41.2937	55.307	78.5519	50.1797	81.9063	66.6234	0.721537	0.210437	4.5309e-05	0.000623338
WBGene00086557	K07A12.8	31.3439	13.6445	18.7296	15.0085	67.6637	55.4095	48.3679	60.3362	38.813	-1.42969	0.314914	3.30791e-07	4.49787e-06																		WBGene00013484	Y69H2.9	51.947	106.656	96.8766	58.7324	56.1263	104.698	58.2887	77.6282	76.3691	0.688138	0.199951	4.54912e-05	0.000625324
WBGene00015894	acdh-2	2148.62	1839.88	2816.26	2294.76	3481.61	3537.75	4159.14	3888.51	3020.82	-0.679025	0.145505	3.31492e-07	4.50403e-06																		WBGene00012916	Y46G5A.28	209.761	329.895	268.174	210.161	209.258	403.179	214.041	259.416	262.986	0.522255	0.147331	4.58829e-05	0.000629143
WBGene00010935	M163.1	220.783	215.132	259.969	257.249	111.897	138.711	160.497	163.026	190.908	0.685149	0.146768	3.32443e-07	4.51357e-06																		WBGene00003426	msp-19	1237.47	806.849	653.16	984.232	1174.33	436.032	1759.93	505.029	944.629	-0.961594	0.289304	4.67986e-05	0.000640638
WBGene00019182	H10E21.1	253.583	237.036	267.273	274.472	176.029	143.607	194.149	147.609	211.72	0.604171	0.128564	3.4341e-07	4.65551e-06																		WBGene00018418	F44E2.4	158.089	211.07	218.572	155.994	93.6749	369.547	117.348	189.368	189.208	0.805488	0.238507	4.69201e-05	0.000641771
WBGene00007232	C01G10.5	17.1082	11.5855	16.4021	62.0545	1.85282	0	2.21117	0.879327	14.0117	4.06927	0.878185	3.58864e-07	4.84333e-06																		WBGene00004904	snf-5	90.442	75.8601	50.6216	90.8472	113.706	51.3947	140.331	57.4376	83.83	-0.779788	0.230482	4.7227e-05	0.000645436
WBGene00010747	K10D11.3	90.4724	125.678	72.5061	85.5481	47.7546	32.0843	42.0197	39.7104	66.9717	1.11524	0.24548	3.63686e-07	4.90477e-06																		WBGene00013233	sdz-33	72.6177	104.486	95.462	68.8354	43.1352	157.899	64.2841	110.526	89.6556	0.80994	0.240794	4.87834e-05	0.000665061
WBGene00012777	lact-8	68.5775	91.1531	95.904	91.2748	144.948	144.441	184.641	147.006	120.993	-0.774737	0.16793	3.67661e-07	4.95469e-06																		WBGene00011336	ubxn-5	101.375	72.629	44.7625	75.2788	92.7757	38.697	131.996	36.0894	74.2004	-0.926168	0.279009	4.93787e-05	0.00067207
WBGene00015488	C05D11.13	159.793	134.646	131.002	120.564	199.35	217.116	226.007	214.762	175.405	-0.609413	0.13024	3.71712e-07	5.00558e-06																		WBGene00010887	M7.12	345.404	215.576	202.391	258.824	384.433	200.507	367.49	276.3	281.366	-0.536957	0.153104	4.95528e-05	0.000673885
WBGene00022741	ZK430.5	194.202	166.112	152.757	117.434	317.989	297.307	342.762	208.656	224.652	-0.820859	0.179341	3.97575e-07	5.33409e-06																		WBGene00000968	dhs-4	121.419	160.567	155.398	100.956	113.18	178.273	104.351	157.311	136.432	0.509257	0.144032	4.97171e-05	0.000675012
WBGene00004359	rhr-2	89.1162	79.5319	73.1206	67.2418	128.235	148.483	136.094	129.497	106.415	-0.753207	0.163629	3.98062e-07	5.33667e-06																		WBGene00009517	clec-167	21.8128	8.79674	7.3668	24.7782	23.0721	3.87725	32.0229	9.56971	16.4121	-1.54382	0.471452	4.98849e-05	0.000676282
WBGene00017077	D2096.10	47.8943	40.505	64.9815	47.1721	88.7108	105.014	123.092	103.31	77.585	-0.974266	0.214282	4.02054e-07	5.37432e-06																		WBGene00006902	vet-6	826.523	1181.86	1024.26	699.243	516.23	1628.21	695.774	1082.84	956.868	0.744669	0.220084	4.98923e-05	0.000676282
WBGene00018885	drd-5	316.152	252.569	280.905	332.425	407.086	467.778	387.122	463.456	363.437	-0.519028	0.11014	4.07052e-07	5.43315e-06																		WBGene00021275	dmsr-2	99.7222	62.676	50.5237	98.1946	97.6639	60.0994	123.493	72.3065	83.0849	-0.676971	0.198212	5.01058e-05	0.000678621
WBGene00007999	tag-297	37.4531	30.0868	47.1243	28.7931	7.32026	11.8413	11.0613	7.92639	22.7008	1.77854	0.396784	4.1711e-07	5.54701e-06																		WBGene00219217	C08F8.15	22.8395	46.1874	55.7029	34.8745	18.4697	81.401	24.0543	49.9645	41.6867	1.06627	0.323763	5.10759e-05	0.000691194
WBGene00007097	B0024.4	211.039	303.426	285.973	567.125	81.5847	75.2893	95.1763	133.046	219.083	1.67645	0.377203	4.2479e-07	5.64501e-06																		WBGene00021774	fbxb-43	19.7137	51.6914	38.8303	25.6982	26.184	59.0957	24.095	58.4553	37.9704	0.972723	0.293143	5.11982e-05	0.000692283
WBGene00020362	fbxb-10	23.0586	27.1286	11.3735	21.6432	50.4605	70.9582	59.7764	53.7585	39.7697	-1.3895	0.311643	4.43507e-07	5.87654e-06																		WBGene00009681	gipc-2	1042.22	623.54	491.761	751.643	956.675	349.816	1592.56	415.647	777.983	-1.04857	0.32022	5.1769e-05	0.000697722
WBGene00007553	C13G3.1	115.021	114.183	129.16	148.134	65.2685	67.6698	76.4244	71.4192	98.41	0.789684	0.173033	4.54603e-07	6.01042e-06																		WBGene00022130	Y71F9B.9	84.061	98.9795	139.656	69.7511	67.752	123.049	73.3851	119.047	96.9601	0.629402	0.183664	5.32407e-05	0.000714072
WBGene00010421	slc-36.4	123.357	98.9877	132.435	128.382	224.209	168.999	214.596	197.285	161.031	-0.687916	0.14963	4.66438e-07	6.14328e-06																		WBGene00019846	gpx-7	186.297	125.091	124.986	164.598	165.529	120.53	211.701	120.745	152.435	-0.503458	0.143191	5.32921e-05	0.000714183
WBGene00012216	W02D9.10	302.175	313.428	356.604	365.054	209.69	243.773	209.364	246.909	280.875	0.522657	0.111503	4.66681e-07	6.14328e-06																		WBGene00013508	Y71A12B.11	234.47	437.734	358.842	249.642	152.499	680.057	204.284	357.096	334.328	0.981468	0.29885	5.47119e-05	0.000732026
WBGene00020648	T21D12.7	13.2182	17.468	18.684	41.9787	2.74431	0	1.1059	2.64159	12.2301	3.43535	0.75108	4.70955e-07	6.19505e-06																		WBGene00015689	spch-2	114.935	79.2223	46.9756	73.4405	106.555	39.6819	143.11	37.1679	80.136	-0.964312	0.294377	5.53487e-05	0.000737567
WBGene00019867	R04B3.2	169.309	169.668	166.548	146.564	262.122	247.401	216.902	258.151	204.583	-0.557698	0.119585	4.7223e-07	6.20733e-06																		WBGene00015688	C10G11.8	574.467	360.659	286.333	467.111	495.982	176.425	812.89	238.19	426.507	-0.995646	0.305045	5.57703e-05	0.000741991
WBGene00004949	sox-2	287.463	280.885	231.556	290.836	191.605	180.605	181.471	148.45	224.109	0.593785	0.128223	4.85958e-07	6.36934e-06																		WBGene00016147	cyp-32A1	181.825	107.754	121.114	176.196	199.888	156.081	213.689	124.421	160.121	-0.531249	0.152622	5.63948e-05	0.000748497
WBGene00019313	btb-10	121.816	108.483	90.9862	109.459	163.381	182.732	191.53	169.226	142.202	-0.670817	0.1463	4.95882e-07	6.49006e-06																		WBGene00009470	F36D3.4	113.122	62.6868	59.8561	77.0932	110.094	32.9425	160.52	64.8386	85.144	-0.925196	0.282826	5.82607e-05	0.000770791
WBGene00012457	acbp-6	62.8731	68.3985	78.0227	89.7025	132.488	138.111	131.971	125.466	103.379	-0.764157	0.168028	5.05129e-07	6.60632e-06																		WBGene00013904	ugt-6	98.7042	197.916	154.812	77.086	91.4879	120.211	97.1334	136.118	121.684	0.654277	0.19361	5.92102e-05	0.000782576
WBGene00011263	R13H4.5	351.67	313.091	335.529	383.337	191.614	232.305	267.833	229.095	288.059	0.552578	0.118979	5.10045e-07	6.66581e-06																		WBGene00015629	C09B9.4	44.6428	28.592	30.4823	51.3939	50.0194	18.4125	71.0084	13.8202	38.5464	-1.08049	0.33346	5.96558e-05	0.000787362
WBGene00019970	R08F11.7	36.3751	55.3401	57.6879	25.1826	16.4618	10.7676	8.84766	7.92534	27.3235	1.82978	0.412886	5.22565e-07	6.82453e-06																		WBGene00016752	C48E7.7	659.423	396.147	262.835	453.523	613.256	174.196	905.582	260.156	465.64	-1.0961	0.340322	6.0044e-05	0.000791854
WBGene00004096	pqm-1	938.279	998.492	1451.16	1203.57	403.875	371.948	624.275	606.013	824.702	1.10181	0.247308	5.34768e-07	6.95888e-06																		WBGene00012781	nspd-7	216.438	158.961	121.45	151.122	211.415	85.1817	320.641	110.347	171.945	-0.800987	0.242994	6.11373e-05	0.000801804
WBGene00021495	sqst-2	361.719	333.435	315.206	408.816	239.052	248.517	255.524	234.671	299.618	0.503243	0.107926	5.51776e-07	7.16993e-06																		WBGene00011954	T23F11.2	81.9371	46.1955	31.4543	70.6722	54.7034	26.1523	109.121	41.4438	57.7099	-0.970147	0.299029	6.12835e-05	0.000803086
WBGene00013836	fbxa-29	79.0075	98.7918	72.3012	103.453	33.9642	48.3684	40.9642	41.4259	64.7845	1.01508	0.227851	5.74465e-07	7.43816e-06																		WBGene00016663	C45E1.4	82.9622	58.2962	51.3561	107.387	94.7861	59.0806	90.7791	54.1927	74.855	-0.665405	0.197864	6.21423e-05	0.000812929
WBGene00007313	clec-147	59.1745	62.9095	61.7375	66.2225	102.929	114.947	116.288	113.734	87.2427	-0.779593	0.17312	6.09026e-07	7.85764e-06																		WBGene00010091	ssp-35	135.393	106.775	89.3363	124.889	135.459	58.9987	173.998	55.1734	110.003	-0.766331	0.232255	6.3555e-05	0.000828917
WBGene00012065	fbxb-2	24.1715	26.1683	15.4358	26.4415	64.1899	51.6185	70.8358	51.1083	41.2462	-1.2678	0.288942	6.52967e-07	8.40071e-06																		WBGene00019043	fbxc-26	34.2618	52.7849	56.7644	32.1211	16.1595	84.3112	27.4847	54.2184	44.7632	1.03032	0.31951	6.42074e-05	0.000836768
WBGene00000753	col-180	188.722	169.487	178.721	240.604	115.671	113.93	101.859	127.806	154.6	0.697441	0.155008	7.19499e-07	9.224e-06																		WBGene00007778	C27D8.2	127.783	90.1636	76.8592	100.029	120.718	56.225	197.755	57.4224	103.369	-0.833576	0.255488	6.56397e-05	0.00085476
WBGene00018345	F42C5.3	31.3716	43.402	41.0759	33.0833	15.7851	7.17482	8.86999	10.0864	23.8561	1.67394	0.383465	7.52877e-07	9.62475e-06																		WBGene00020080	math-37	23.8808	50.585	44.1568	27.5322	16.1583	64.9313	28.6249	49.9672	38.2296	0.989315	0.30696	6.68427e-05	0.000869743
WBGene00008829	cyp-35D1	34.1177	41.7133	39.8106	30.0116	78.7511	69.9469	103.998	72.2315	58.8226	-1.05162	0.239354	7.63625e-07	9.75528e-06																		WBGene00009840	fbxa-189	124.691	68.17	74.7908	146.829	113.77	68.8339	107.389	89.3308	99.2255	-0.628226	0.186983	6.76545e-05	0.000878236
WBGene00010328	F59C6.11	131.472	100.644	125.099	115.605	56.988	64.4512	77.5293	54.6649	90.8066	0.837764	0.189115	7.80112e-07	9.94492e-06																		WBGene00014246	ZK1307.3	28.8866	16.5137	14.5006	29.3927	39.5391	11.6021	44.2221	11.6704	24.5409	-1.19719	0.375075	6.94269e-05	0.000899135
WBGene00008577	F08G2.5	142.319	172.186	350.106	368.691	34.0293	30.0682	48.742	85.5382	153.96	2.1712	0.505733	7.82376e-07	9.96679e-06																		WBGene00017978	msrp-1	117.244	95.6556	76.3135	119.665	122.121	56.0913	208.941	68.9625	108.124	-0.811257	0.24936	6.94273e-05	0.000899135
WBGene00021774	fbxb-43	20.8514	27.1208	27.6208	25.2598	71.594	66.6436	80.8192	43.1878	45.3872	-1.25301	0.287649	7.90138e-07	1.00586e-05																		WBGene00009964	fip-6	52.4428	25.2762	21.6508	55.2431	54.4589	30.9562	61.8662	32.8955	41.8487	-0.878368	0.271037	7.13923e-05	0.000920719
WBGene00045498	F56F4.8	151.635	125.033	130.799	133.401	221.896	190.35	247.92	197.38	174.802	-0.62075	0.137644	7.99777e-07	1.01671e-05																		WBGene00009423	F35E8.10	23.8382	19.8009	4.1861	33.9617	59.3799	5.80959	50.6456	15.9354	26.6947	-1.61762	0.517466	7.14274e-05	0.000920719
WBGene00019376	lipl-4	85.6629	88.652	70.6244	94.2791	36.6633	42.9476	42.1615	44.4767	63.1834	0.944143	0.214693	8.05234e-07	1.02293e-05																		WBGene00021007	W03F11.4	95.6856	63.7606	54.9072	83.5026	87.532	20.3688	149.248	37.2354	74.03	-1.06814	0.337051	7.26296e-05	0.00093476
WBGene00019868	R04B3.3	77.0988	60.1693	47.9365	56.3918	27.454	23.6814	18.8048	24.6606	42.0247	1.22887	0.28207	8.16552e-07	1.03658e-05																		WBGene00269425	C49G7.13	18.6781	2.19959	2.09948	8.26007	24.6406	3.87533	16.0584	3.18861	9.87502	-2.20216	0.691114	7.60031e-05	0.000974393
WBGene00008599	F09A5.2	166.53	150.528	142.191	158.234	84.102	106.621	84.0424	95.094	123.418	0.684769	0.152978	8.17453e-07	1.037e-05																		WBGene00019564	K09D9.1	197.111	54.9922	62.9472	212.013	533.777	159.839	460.276	72.2681	219.153	-1.70708	0.555656	7.69649e-05	0.000985199
WBGene00008042	C40H1.7	497.837	537.307	392.104	519.22	183.132	290.884	132.218	138.247	336.369	1.27116	0.293497	8.29705e-07	1.05034e-05																		WBGene00020502	T14B4.8	91.2493	132.906	150.113	102.666	106.079	169.384	104.112	153.284	126.224	0.519544	0.152701	7.81481e-05	0.000997261
WBGene00007431	C08B6.11	159.643	151.362	116.184	139.217	227.941	244.312	200.234	221.082	182.497	-0.618831	0.137621	8.48913e-07	1.07093e-05																		WBGene00017133	EEED8.2	64.3145	142.982	140.548	106.466	46.9902	274.134	96.4439	128.59	125.059	0.979165	0.308721	7.83021e-05	0.000998458
WBGene00012604	nspe-2	104.263	79.1189	98.0738	132.519	45.4179	64.3264	35.4255	37.0481	74.5241	1.08576	0.249468	8.5122e-07	1.07309e-05																		WBGene00016181	C28C12.11	49.6292	32.2085	24.2656	47.1686	47.2302	17.6099	58.3396	18.9027	36.9193	-0.970046	0.305382	8.01639e-05	0.00101984
WBGene00018056	F35F10.6	38.3962	29.9871	28.4245	33.7181	79.0517	68.7224	62.0138	73.1683	51.6853	-1.03798	0.237669	8.54067e-07	1.07519e-05																		WBGene00000771	cpb-2	45.7229	34.0846	16.8571	51.39	53.0371	19.3905	82.2392	28.7143	41.4295	-1.05749	0.336085	8.12793e-05	0.00103324
WBGene00022060	dmd-9	365.704	353.672	342.832	310.184	265.111	204.287	253.487	205.333	287.576	0.53057	0.116498	8.56394e-07	1.07663e-05																		WBGene00045387	K09H9.8	103.571	77.0147	63.7284	115.662	99.5668	74.5323	132.625	54.1661	90.1083	-0.647911	0.196974	8.21216e-05	0.00104315
WBGene00015602	fbxa-158	14.2812	17.4421	12.9951	13.2158	0	0	1.11202	0	7.38078	5.12144	1.34128	9.22896e-07	1.15703e-05																		WBGene00011229	R11.4	65.6623	106.344	102.939	70.9744	53.8251	149.071	71.3576	94.4067	89.3225	0.69797	0.214808	8.59157e-05	0.00108634
WBGene00019227	sgca-1	164.607	191.866	166.447	176.884	271.19	238.034	257.742	256.511	215.41	-0.515107	0.11327	9.25624e-07	1.15965e-05																		WBGene00017253	sdz-9	95.5121	150.658	150.298	100.035	89.2684	221.916	106.522	126.507	130.09	0.645801	0.19698	8.60199e-05	0.00108683
WBGene00015865	C16E9.1	144.31	136.849	116.186	165.556	79.6052	71.0492	84.0649	82.786	110.051	0.756446	0.171267	9.36971e-07	1.17225e-05																		WBGene00008483	E04D5.4	58.9746	29.2784	29.6142	52.4831	43.2692	23.1816	80.0155	26.1782	42.8743	-0.958776	0.304458	8.64555e-05	0.0010915
WBGene00007919	cup-16	139.471	206.031	191.853	172.736	116.599	78.4037	111.476	80.3366	137.113	0.818667	0.186302	9.44776e-07	1.1812e-05																		WBGene00018568	F47E1.4	113.309	161.616	170.836	122.048	147.515	231.758	102.69	201.029	156.35	0.573933	0.172535	8.81575e-05	0.00111129
WBGene00003095	lys-6	237.241	220.401	207.134	230.328	369.221	317.704	291.444	312.248	273.215	-0.501201	0.110213	9.66135e-07	1.20624e-05																		WBGene00022562	ZC204.12	103.714	156.186	157.257	105.55	103.248	132.696	78.116	150.896	123.458	0.535029	0.15995	9.12942e-05	0.00114996
WBGene00015805	C15H9.11	215.769	216.471	255.635	321.867	154.969	154.078	165.016	136.654	202.558	0.67298	0.151514	9.72853e-07	1.21379e-05																		WBGene00010779	K11H3.2	45.595	30.8027	25.1045	55.9921	44.7386	20.3317	62.1887	22.3079	38.3827	-0.930249	0.295638	9.13735e-05	0.00115008
WBGene00015218	B0507.1	117.887	113.564	130.811	140.35	59.4687	69.9763	70.7893	81.0225	97.9836	0.772607	0.175482	9.92119e-07	1.23529e-05																		WBGene00009677	F44A6.5	232.391	164.976	179.414	310.217	317.327	233.465	317.917	216.807	246.564	-0.503989	0.149988	9.4185e-05	0.00118188
WBGene00000695	col-121	46.1391	62.0239	14.6233	38.4641	3.66842	5.37663	13.2822	1.76241	23.1675	2.52672	0.596927	1.00142e-06	1.24504e-05																		WBGene00019579	oac-57	66.727	38.4182	42.2057	84.3744	82.0297	23.3497	52.4195	37.5299	53.3818	-0.883512	0.280732	9.46081e-05	0.00118629
WBGene00020390	T10B5.4	91.6429	83.302	69.3168	64.1953	165.914	128.675	131.624	129.214	107.986	-0.78721	0.179428	1.01795e-06	1.26312e-05																		WBGene00008553	F07C6.2	117.506	63.8457	61.0346	113.987	94.6568	51.2399	117.6	84.8909	88.0952	-0.667138	0.206373	9.50191e-05	0.0011899
WBGene00015014	bath-24	232.236	277.719	254.258	252.909	197.642	137.489	135.127	163.999	206.422	0.629856	0.141235	1.02841e-06	1.27436e-05																		WBGene00019550	K09C4.5	349.117	404.626	450.796	349.639	245.236	512.848	226.234	389.219	365.964	0.520919	0.155919	9.53412e-05	0.00119277
WBGene00001693	grd-4	45.95	50.2844	43.0522	40.9817	69.0177	101.992	98.6091	100.54	68.8034	-0.950097	0.21896	1.04125e-06	1.28939e-05																		WBGene00010633	nspd-2	506.312	341.918	303.418	452.657	471.997	208.343	850.464	227.881	420.374	-0.924748	0.297309	9.8063e-05	0.00122497
WBGene00017873	F28A10.5	3.29123	3.87517	4.065	0	14.7118	24.7315	22.1662	25.5868	12.3035	-2.63415	0.605996	1.06524e-06	1.3182e-05																		WBGene00012131	T28F3.5	164.965	75.6588	111.669	131.87	177.317	116.102	172.684	102.937	131.65	-0.586805	0.178958	9.82217e-05	0.0012256
WBGene00045297	fbxc-43	147.904	168.384	160.841	140.895	89.1596	102.047	90.8203	97.8681	124.74	0.656334	0.148002	1.07669e-06	1.33146e-05																		WBGene00011798	T16G1.4	35.3124	6.59768	11.5734	46.8037	28.4592	19.3853	32.0325	12.7591	24.1154	-1.27187	0.414445	0.000101041	0.00125649
WBGene00017937	F30H5.3	62.924	66.0725	12.1882	49.1149	7.3073	11.8514	9.95007	6.16226	28.1963	2.2181	0.52598	1.11721e-06	1.37688e-05																		WBGene00008831	F14H3.12	70.2151	51.7378	58.089	105.619	103.798	37.7159	103.405	62.5998	74.1475	-0.754815	0.238146	0.000102278	0.00126997
WBGene00006016	srx-125	1.68478	4.48601	0.337054	5.61727	28.043	12.4435	28.1239	36.545	14.6601	-3.29338	0.866825	1.12144e-06	1.38116e-05																		WBGene00003467	msp-81	695.275	505.234	424.497	583.429	725.848	309.371	1055.68	308.736	576.009	-0.846303	0.271646	0.000104865	0.00129916
WBGene00219217	C08F8.15	24.176	36.8331	19.498	25.2363	66.9306	56.9996	65.2989	64.3235	44.912	-1.15973	0.270596	1.12981e-06	1.39052e-05																		WBGene00021772	math-45	50.9115	123.148	119.01	102.781	46.1274	128.937	63.9905	124.421	94.9159	0.787601	0.250636	0.000106519	0.00131571
WBGene00019975	flp-34	57.7299	72.571	44.8776	58.9483	20.5899	26.1149	26.0043	20.836	40.959	1.22087	0.286778	1.19294e-06	1.46327e-05																		WBGene00010475	K01F9.2	160.803	129.781	90.227	173.465	174.842	133.684	182.497	102.026	143.416	-0.530444	0.160818	0.000107433	0.00132503
WBGene00007231	C01G10.4	14.9318	17.3915	10.7373	66.4916	3.71286	1.07631	0	0	14.2927	4.07265	0.937342	1.20284e-06	1.47441e-05																		WBGene00043948	ZC262.7	35.1343	77.0516	64.3659	40.4048	30.9688	68.6711	40.6278	59.4119	52.0795	0.761973	0.241784	0.000107996	0.00133
WBGene00007904	C33G3.4	561.311	470.018	359.946	444.754	734.105	619.247	717.689	640.132	568.4	-0.529265	0.118466	1.25274e-06	1.5335e-05																		WBGene00021878	Y54G2A.13	53.0006	39.5816	29.5051	52.3074	63.7929	30.0562	98.2104	23.3975	48.7315	-0.959801	0.311708	0.000108113	0.00133045
WBGene00016880	fbxb-95	44.9615	54.22	30.0571	30.0869	91.844	80.5934	110.731	77.5736	65.0084	-1.07658	0.253174	1.34675e-06	1.64416e-05																		WBGene00008301	pals-39	25.961	18.694	2.10343	59.6525	55.3906	17.4454	48.0706	18.0742	30.674	-1.48425	0.494729	0.000109991	0.00135028
WBGene00006615	trp-2	166.22	170.093	149.84	166.058	84.3718	78.3614	119.768	100.999	129.464	0.710019	0.163076	1.35684e-06	1.65536e-05																		WBGene00016440	gipc-1	703.862	432.183	347.868	549.733	633.367	195.749	955.339	212.613	503.839	-1.06572	0.3555	0.000110517	0.00135499
WBGene00013799	athp-3	141.402	123.902	116.977	125.2	198.456	174.051	205.981	204.531	161.312	-0.587264	0.133045	1.36713e-06	1.6661e-05																		WBGene00013303	Y57G11C.5	56.5541	24.4883	18.8419	30.6572	43.8158	21.9084	98.9917	20.0268	39.4105	-1.21122	0.402346	0.000113544	0.00139006
WBGene00011979	T24B8.5	406.624	481.717	459.507	413.788	253.125	328.711	343.841	235.816	365.391	0.566646	0.128014	1.371e-06	1.66927e-05																		WBGene00020840	spch-3	441.443	305.827	213.388	394.699	414.218	123.927	632.252	154.031	334.973	-1.05775	0.348999	0.000113663	0.00139048
WBGene00017267	numr-2	100.806	106.456	381.797	244.439	29.4106	18.2619	43.1938	44.0837	121.056	2.38477	0.574435	1.39661e-06	1.69818e-05																		WBGene00008944	F19B2.5	1900.04	1286.61	1308.55	1990.11	2134.44	1532.49	3275.97	1395.37	1852.95	-0.653757	0.205694	0.000116109	0.00141518
WBGene00017270	numr-1	100.806	106.456	381.797	244.439	29.4106	18.2619	43.1938	44.0837	121.056	2.38477	0.574435	1.39661e-06	1.69818e-05																		WBGene00009680	msd-1	713.182	483.168	335.094	521.267	617.04	267.734	935.282	273.776	518.318	-0.886638	0.289226	0.000117068	0.00142582
WBGene00009517	clec-167	23.1052	26.1879	24.3736	33.6199	5.49561	1.07598	6.63865	7.92832	16.0531	2.10698	0.497996	1.40507e-06	1.70732e-05																		WBGene00044798	tbx-43	21.7818	48.3948	34.6042	22.0276	10.0155	55.2117	12.6331	32.9432	29.7015	1.16957	0.38749	0.00011739	0.00142869
WBGene00000620	col-43	15.3674	16.468	27.621	18.0401	54.1451	44.0744	76.387	48.4741	37.5721	-1.36962	0.32427	1.41032e-06	1.71256e-05																		WBGene00022605	dmsr-11	11.4194	1.09928	2.10287	11.0092	8.45948	0	16.0173	0	6.26344	-3.32505	1.01479	0.00011856	0.00144081
WBGene00000111	alh-5	228.785	192.985	209.611	235.387	141.088	126.951	134.995	157.695	178.437	0.578356	0.131106	1.44345e-06	1.74928e-05																		WBGene00015765	C14C11.1	133.907	87.9779	91.4093	105.542	136.234	74.6132	158.126	80.7897	108.575	-0.587053	0.182354	0.000118776	0.00144153
WBGene00011397	T03E6.8	51.6648	54.9222	31.8425	31.3623	97.6838	86.6991	86.9762	90.1414	66.4115	-0.999787	0.23504	1.45098e-06	1.75724e-05																		WBGene00016872	dop-4	138.191	103.356	94.7915	147.748	119.928	88.2212	157.682	75.5041	115.678	-0.557588	0.172016	0.000119098	0.00144417
WBGene00013484	Y69H2.9	55.0412	62.0925	59.3102	61.2138	103.456	148.516	100.674	102.176	86.5599	-0.856897	0.200482	1.53008e-06	1.84564e-05																		WBGene00008529	F02E9.3	75.7314	36.2949	51.4053	61.4929	69.3227	24.2178	87.2375	36.1339	55.2295	-0.847658	0.275276	0.000120386	0.00145765
WBGene00020254	T05C3.2	12.1433	13.6032	17.0635	9.58337	44.7571	59.2569	28.7446	40.4948	28.2058	-1.54956	0.369249	1.55782e-06	1.87288e-05																		WBGene00015992	C18H2.5	27.0391	13.1921	8.44527	28.4462	26.877	14.5485	45.5842	8.51062	21.5804	-1.27634	0.424277	0.000120596	0.00145914
WBGene00009853	arrd-27	64.4522	46.381	58.4844	71.183	26.7187	26.825	17.7342	26.4665	42.2806	1.17396	0.278626	1.58052e-06	1.89642e-05																		WBGene00015024	B0205.10	86.2001	54.9684	54.7214	71.5672	86.8823	23.2959	142.91	43.5879	70.5166	-0.967309	0.319064	0.000121674	0.0014711
WBGene00011683	phat-6	95.1838	108.306	82.0429	98.837	169.321	155.673	151.791	149.046	126.275	-0.656127	0.151434	1.6611e-06	1.98393e-05																		WBGene00011203	R10E4.7	132.676	97.9024	83.7443	130.338	132.626	89.0837	223.242	90.3032	122.489	-0.669066	0.212324	0.000122519	0.00148024
WBGene00010833	M03B6.1	245.448	197.952	225.805	179.955	126.366	151.215	77.5921	105.908	163.78	0.810945	0.189879	1.67495e-06	1.99915e-05																		WBGene00007714	C25D7.1	56.8849	29.7122	16.6503	46.8216	47.9418	29.989	60.2327	24.4114	39.0805	-0.911888	0.297957	0.000122808	0.00148265
WBGene00013852	hhat-1	33.0436	29.1208	17.8824	27.6162	0	5.38369	6.64059	6.16841	15.732	2.34058	0.562891	1.7065e-06	2.03015e-05																		WBGene00044684	T08G11.2	39.4218	23.0968	15.7363	45.8902	43.1341	3.87485	67.7238	23.3807	32.7823	-1.33319	0.449483	0.000123621	0.00148921
WBGene00010256	hrg-3	62.7619	59.7373	109.791	87.3247	35.2229	37.4868	34.3798	23.8457	56.3188	1.18331	0.283195	1.76854e-06	2.09298e-05																		WBGene00009308	F32A11.3	164.045	112.167	107.228	121.142	151.587	79.4667	250.781	74.4181	132.604	-0.756057	0.243858	0.000123558	0.00148921
WBGene00012199	mltn-3	51.8087	34.9522	40.6254	47.9658	15.5468	19.382	14.3773	12.3282	29.6233	1.37301	0.330172	1.81914e-06	2.14728e-05																		WBGene00015937	C17H12.12	173.552	139.635	93.7853	131.227	172.931	66.8996	248.948	88.2724	139.406	-0.776565	0.25168	0.00012608	0.00151552
WBGene00016379	C33H5.13	292.247	344.078	351.69	420.104	188.469	205.455	270.22	230.909	287.897	0.605926	0.139753	1.84643e-06	2.17807e-05																		WBGene00012041	T26E3.8	43.5869	73.6849	66.152	38.5467	33.8762	98.8262	35.5466	54.2087	55.5535	0.821892	0.267169	0.000127947	0.00153684
WBGene00007953	hda-11	16.4644	6.78081	12.9981	7.21626	32.1211	41.9237	47.6039	31.7287	24.6046	-1.63775	0.395173	1.85231e-06	2.18358e-05																		WBGene00006051	ssq-2	472.49	298.004	212.447	388.2	363.115	138.594	653.527	196.69	340.384	-0.979253	0.325558	0.000128132	0.00153796
WBGene00019037	fbxb-17	102.071	88.1467	95.0483	105.845	147.767	156.94	191.527	148.951	129.537	-0.667972	0.155376	1.86045e-06	2.19176e-05																		WBGene00007156	B0379.2	62.1929	36.3008	37.6868	46.8114	60.9138	21.3028	85.1495	21.248	46.4507	-0.961786	0.318126	0.000128334	0.00153815
WBGene00015259	dod-20	13.1837	16.4759	23.5599	34.856	1.83408	4.30145	2.21365	3.52475	12.4937	2.61963	0.626564	1.86729e-06	2.19839e-05																		WBGene00013838	fbxa-31	100.537	68.7947	76.555	125.576	137.64	87.089	129.409	79.6175	100.652	-0.578568	0.180301	0.000128541	0.00153952
WBGene00022130	Y71F9B.9	88.9378	73.6336	71.4905	76.9551	135.788	120.413	149.442	124.262	105.115	-0.712043	0.166605	1.91747e-06	2.25601e-05																		WBGene00015362	fbxa-105	97.5765	56.0858	49.3834	78.9273	130.844	71.7066	101.977	52.0883	79.8236	-0.723108	0.232298	0.000130797	0.0015609
WBGene00010519	K03A11.1	296.545	298.077	245.378	260.2	355.724	454.413	463.384	359.274	341.624	-0.529513	0.121495	2.06162e-06	2.41466e-05																		WBGene00013138	Y53C10A.10	86.3308	49.4688	34.8509	58.7268	55.2788	31.0392	126.437	26.5974	58.5912	-1.01669	0.339807	0.000132292	0.0015742
WBGene00007138	B0285.6	129.928	150.399	113.746	117.607	76.89	71.036	68.5869	77.5093	100.713	0.732919	0.172299	2.07894e-06	2.43338e-05																		WBGene00022849	acs-6	104.954	72.5672	86.3918	112.874	103.769	57.2018	148.489	58.4919	93.0924	-0.668523	0.213587	0.000132499	0.00157462
WBGene00045461	C25F9.14	132.612	113.593	148.074	129.574	84.0468	64.6669	49.9752	80.8563	100.425	0.824763	0.195843	2.19973e-06	2.55664e-05																		WBGene00022751	msrp-2	608.056	382.601	336.181	438.977	542.729	201.122	791.738	256.766	444.771	-0.869264	0.286605	0.000132518	0.00157462
WBGene00011677	cyp-13A1	25.3214	33.9586	25.1866	34.8056	2.7464	7.5337	8.85023	9.68894	18.5114	1.85886	0.453439	2.2534e-06	2.61568e-05																		WBGene00019700	btb-11	114.113	161.678	150.009	115.644	73.9468	252.83	91.8366	138.157	137.277	0.720259	0.232272	0.00013408	0.00158862
WBGene00021076	W07E6.5	149.929	168.536	168.264	165.706	205.853	245.561	284.892	259.741	206.06	-0.563864	0.130929	2.3571e-06	2.72714e-05																		WBGene00019035	fbxb-26	55.0075	56.0875	65.1167	33.0398	24.6346	110.458	28.6591	82.9105	56.9892	0.991933	0.330542	0.000134772	0.00159454
WBGene00010686	K08F9.3	35.6877	48.8059	36.6748	39.5749	14.4008	13.0077	12.0946	16.2203	27.0583	1.38065	0.335993	2.37938e-06	2.74907e-05																		WBGene00019785	M70.3	102.04	83.6126	77.8299	99.616	144.61	47.8049	155.43	68.6333	97.447	-0.736612	0.23871	0.000135391	0.00160073
WBGene00006367	sym-2	99.2295	114.216	106.232	121.387	69.442	53.9185	67.6444	43.0459	84.3894	0.842558	0.202896	2.61137e-06	2.99533e-05																		WBGene00013013	clec-145	70.5711	54.9884	18.9018	83.5176	70.0601	43.6004	91.7263	22.3215	56.9609	-0.998036	0.333556	0.000137174	0.00161694
WBGene00004155	pqn-73	52.1099	70.8491	6.53552	16.8751	3.54178	4.33117	5.55935	1.77063	20.1966	2.96315	0.737178	2.61181e-06	2.99533e-05																		WBGene00015076	B0238.12	89.0606	58.3132	39.6877	78.9455	84.9159	51.2989	109.591	58.4122	71.2781	-0.690295	0.222092	0.000137672	0.0016196
WBGene00020860	nspd-10	135.432	127.309	108.708	178.801	230.747	234.771	192.564	256.822	183.144	-0.686668	0.163345	2.6502e-06	3.03362e-05																		WBGene00022375	Y94H6A.2	36.343	18.6942	10.5154	38.5449	45.3932	10.6607	25.1846	17.0106	25.2933	-1.16166	0.390768	0.000140979	0.00165447
WBGene00044443	ZC21.10	6.51642	8.6732	16.2489	16.9525	27.7674	38.5557	50.9975	53.0234	27.3419	-1.63692	0.404257	2.69876e-06	3.08338e-05																		WBGene00022090	Y69A2AR.19	102.688	97.869	63.182	107.646	126.665	52.3096	176.822	59.7346	98.3646	-0.782131	0.256467	0.000141036	0.00165447
WBGene00271775	EGAP1.5	28.557	31.1573	35.5079	26.4396	76.3266	67.6847	51.6365	75.283	49.0741	-1.04164	0.253916	2.80664e-06	3.19776e-05																		WBGene00019272	H42K12.3	35.2826	61.4983	55.7489	44.9116	21.5705	137.494	25.1917	61.8041	55.4377	1.12143	0.378963	0.000141924	0.00166137
WBGene00044304	F52B10.3	42.346	26.6526	23.268	27.353	61.7426	62.2052	101.84	61.0964	50.8129	-1.16014	0.287933	2.80768e-06	3.19776e-05																		WBGene00001310	end-1	11.3976	35.204	32.418	15.6046	12.3434	41.6296	14.9755	25.4938	23.6333	1.1163	0.375803	0.000145503	0.00170018
WBGene00008066	fbxb-65	8.78598	14.5347	12.186	6.01117	37.6099	38.7075	38.7422	27.3188	22.987	-1.57823	0.389075	2.88114e-06	3.27117e-05																		WBGene00012296	spe-46	63.2932	47.2919	35.6845	56.9031	66.2277	24.2199	105.55	29.7594	53.6162	-0.924458	0.310593	0.00014656	0.00170838
WBGene00003094	lys-5	159.579	146.915	125.093	195.392	97.6153	82.6383	96.4155	78.5075	122.769	0.746092	0.179617	3.01353e-06	3.41509e-05																		WBGene00019418	fbxb-54	135.938	179.266	169.019	129.408	127.819	276.12	119.283	180.689	164.693	0.571205	0.179957	0.000146818	0.00171019
WBGene00023407	cex-1	240.942	222.534	256.693	252.951	169.178	128.883	181.656	164.007	202.106	0.552806	0.129886	3.1264e-06	3.53469e-05																		WBGene00007725	C25F9.5	127.854	93.4526	84.3482	122.048	139.844	94.0574	132.383	71.2624	108.156	-0.531744	0.166153	0.000150069	0.00174438
WBGene00007322	C05B5.5	82.6948	114.51	80.773	76.2168	43.8782	48.1539	46.1138	38.7903	66.3914	0.919138	0.224538	3.16558e-06	3.57549e-05																		WBGene00001905	his-31	1097.53	1550.1	1524.32	1204.47	789.409	2155.82	940.341	1441.75	1337.97	0.630982	0.202341	0.000150375	0.00174671
WBGene00013646	Y105C5B.3	63.759	53.3211	69.0563	37.2445	23.8314	26.8903	12.1734	17.6216	37.9872	1.33726	0.331563	3.17433e-06	3.58167e-05																		WBGene00010189	F57B1.6	6.21586	23.1033	35.5405	12.851	6.17295	34.8499	10.3726	18.0569	18.3954	1.39766	0.479851	0.000155026	0.00179069
WBGene00012624	fbxa-150	247.186	235.503	236.411	250.008	170.574	159.151	138.354	185.932	202.89	0.521365	0.122155	3.29464e-06	3.71511e-05																		WBGene00007448	C08F8.6	50.8733	32.9906	21.0236	38.5453	57.7128	12.5982	49.2441	18.0728	35.1326	-1.03628	0.351241	0.000155155	0.00179093
WBGene00007548	C13C4.4	118.545	103.65	110.484	132.297	167.945	184.896	202.593	170.982	148.924	-0.59786	0.142218	3.34423e-06	3.76869e-05																		WBGene00015613	C08F1.10	89.2217	162.776	122.757	110.136	31.5786	230.559	61.9765	140.287	118.661	0.992133	0.336085	0.000155576	0.00179454
WBGene00016997	cebp-1	156.462	193.275	286.708	251.695	108.593	101.721	106.765	151.644	169.608	0.843407	0.205627	3.35771e-06	3.78153e-05																		WBGene00010184	F57A10.2	36.1918	15.4079	22.8809	41.3144	39.4498	13.5421	47.5118	21.2266	29.6907	-0.991369	0.335075	0.000160156	0.00183968
WBGene00009293	F31D4.8	311.851	298.829	200.64	291.673	167.46	190.038	127.411	168.443	219.543	0.689088	0.166531	3.63592e-06	4.07465e-05																		WBGene00021579	clec-73	73.7775	47.2789	49.5132	68.8261	81.4809	25.2072	138.222	47.8564	66.5203	-0.925375	0.313333	0.000161165	0.00184871
WBGene00011335	T01E8.8	249.41	243.271	223.413	270.421	166.891	190.344	159.38	137.463	205.074	0.549574	0.130599	3.80692e-06	4.25841e-05																		WBGene00013452	Y67A10A.3	31.236	11.6551	17.296	26.5321	28.0838	8.32367	44.3214	9.84309	22.1614	-1.2226	0.419148	0.000161486	0.00185111
WBGene00009824	gpdh-1	90.1641	116.352	164.112	203.008	264.841	258.172	368.499	242.285	213.429	-0.893699	0.221477	3.96219e-06	4.4212e-05																		WBGene00018134	F37A4.4	82.1556	57.1659	70.7256	108.279	86.7763	38.7955	151.576	55.3186	81.3491	-0.807807	0.269781	0.000162098	0.00185556
WBGene00013013	clec-145	74.6671	88.1687	73.9278	96.191	42.2028	50.5311	32.102	40.5391	62.2912	0.913486	0.226092	3.97367e-06	4.43129e-05																		WBGene00010980	R02D5.7	41.3786	20.9082	24.9857	37.6393	47.1592	21.2837	53.2568	15.922	32.8167	-0.938882	0.316564	0.000163449	0.00186844
WBGene00005602	srj-14	62.4488	40.2608	56.3057	37.9862	104.127	97.9314	95.7599	86.6351	72.6819	-0.874686	0.216555	4.15615e-06	4.62344e-05																		WBGene00007553	C13G3.1	108.859	63.799	78.5533	108.307	122.569	82.3145	141.45	79.6864	98.1923	-0.571221	0.182039	0.000163791	0.00186977
WBGene00017083	kin-33	153.952	182.491	143.004	166.723	246.579	222.187	267.639	225.324	200.987	-0.533848	0.127295	4.25391e-06	4.7254e-05																		WBGene00018236	fbxb-71	30.1087	50.5856	62.0196	38.5453	19.2376	64.9292	30.9207	59.5338	44.4851	0.859433	0.288542	0.000164793	0.00187879
WBGene00022112	Y71F9AL.7	73.4857	67.7809	43.055	61.3703	119.381	99.9423	151.695	108.423	90.6417	-0.883152	0.220106	4.38521e-06	4.86038e-05																		WBGene00014197	ZK1053.2	54.0322	38.4831	33.7079	49.5549	57.6543	19.3898	93.6816	20.2057	45.8387	-1.00306	0.343615	0.000169352	0.00192508
WBGene00020566	ttr-7	56.6337	64.6325	64.1628	42.3198	109.004	92.1747	108.665	110.355	80.9935	-0.79561	0.196061	4.41642e-06	4.88901e-05																		WBGene00003450	msp-57	1193.52	859.669	587.048	920.623	1157.79	443.754	1702.83	472.122	917.169	-0.909968	0.310036	0.000171697	0.00194794
WBGene00005816	srw-69	17.578	8.72243	32.4964	36.0584	1.83411	4.30142	1.10683	4.40595	13.3129	2.70473	0.683301	4.42371e-06	4.8941e-05																		WBGene00022559	fbxb-20	49.8056	86.8847	62.9761	51.3962	41.5837	107.538	35.5635	73.3363	63.6355	0.761715	0.253869	0.00017738	0.00200555
WBGene00010870	let-522	313.056	280.264	348.67	339.96	189.769	214.434	201.16	258.691	268.251	0.526433	0.125497	4.44708e-06	4.91397e-05																		WBGene00017667	ttr-37	150.986	89.1396	96.7486	160.666	218.869	152.839	206.244	102.948	147.305	-0.635151	0.207261	0.000177574	0.00200637
WBGene00304201	T07H8.11	15.1058	18.3183	11.4001	23.0649	2.78241	0	0	0	8.83393	4.08323	0.961439	4.50036e-06	4.96378e-05																		WBGene00006416	sams-5	355.574	284.505	203.603	279.386	322.998	240.403	440.844	167.722	286.879	-0.556585	0.178556	0.000178101	0.00200958
WBGene00019591	fbxc-25	54.9946	42.6693	26.8106	24.0196	83.3723	84.9916	82.9895	80.1694	60.0021	-1.05148	0.265694	4.7857e-06	5.253e-05																		WBGene00017059	msrp-5	66.021	49.5434	30.0361	54.1952	67.4483	23.2036	73.3179	24.4024	48.521	-0.882902	0.300362	0.000179078	0.00201923
WBGene00000748	col-175	7.67675	1.93648	70.6749	34.8996	1.8368	1.0746	1.10729	0.881509	15.011	4.07887	1.03965	5.68817e-06	6.14336e-05																		WBGene00017498	pud-4	192.085	235.261	375.874	283.477	155.346	359.775	120.437	366.288	261.068	0.711831	0.236171	0.000179784	0.00202581
WBGene00018385	F43C11.8	14.2749	30.039	35.7531	24.0566	0.917813	6.45173	0	7.05216	14.8182	2.54311	0.655033	5.73872e-06	6.17959e-05																		WBGene00003449	msp-56	486.724	334.62	260.609	393.969	479.226	166.364	774.112	178.233	384.232	-0.997726	0.344774	0.000180116	0.00202634
WBGene00013086	arrd-2	161.5	142.467	144.609	143.03	226.51	183.886	268.959	230.871	187.729	-0.573588	0.140048	5.75645e-06	6.195e-05																		WBGene00003562	ncr-2	111.281	61.5625	95.0204	132.136	122.859	72.744	120.782	79.7886	99.5218	-0.570854	0.183735	0.000181904	0.00204275
WBGene00013872	ZC374.2	68.3176	69.8904	53.6248	51.5768	134.476	139.96	80.7415	118.888	89.6844	-0.87421	0.220993	5.76428e-06	6.19976e-05																		WBGene00020364	T08E11.8	27.0113	13.1947	4.21158	28.4486	18.4534	6.78581	33.1486	9.57044	17.6031	-1.39163	0.487194	0.000182967	0.0020533
WBGene00007745	C26D10.4	61.7387	54.3745	65.0009	41.9657	96.9269	103.376	103.955	102.145	78.6855	-0.776624	0.194339	5.83854e-06	6.2722e-05																		WBGene00019115	nhr-195	59.565	39.6367	32.5337	61.2769	73.0413	46.6128	83.8859	28.2366	53.0986	-0.782844	0.262914	0.000183625	0.00205789
WBGene00009212	atz-1	415.979	386.496	264.024	347.595	555.258	482.651	557.969	491.801	437.722	-0.523582	0.127098	5.9511e-06	6.3818e-05																		WBGene00016058	nspd-3	363.036	246.352	194.136	271.296	401.497	128.35	591.607	171.31	295.948	-0.958338	0.331323	0.000186109	0.00207978
WBGene00006429	arrd-3	63.0231	34.6592	37.654	71.5358	12.6614	13.6641	23.6142	18.2149	34.3784	1.43	0.371041	5.97085e-06	6.39174e-05																		WBGene00007368	C06B8.2	56.2584	26.7731	27.896	72.6877	51.3905	21.6316	47.0843	36.0571	42.4723	-0.866334	0.294554	0.000186206	0.00207978
WBGene00086560	ZK355.8	8.55236	13.5088	13.9414	10.9465	0.926932	0	0	0	5.9845	4.7596	1.37286	6.06623e-06	6.48912e-05																		WBGene00020905	T28H11.7	91.1496	74.8132	49.1124	83.533	104.959	51.3036	155.653	58.4164	83.6175	-0.762465	0.256813	0.000186744	0.00208439
WBGene00011925	T22C8.4	64.7795	71.6945	65.8036	63.7301	105.514	109.66	119.555	113.688	89.303	-0.685473	0.170796	6.26311e-06	6.68083e-05																		WBGene00007320	C05B5.2	160.491	146.342	105.429	150.553	172.191	75.4916	303.55	67.9636	147.751	-0.840293	0.287259	0.000189429	0.00210817
WBGene00019034	fbxb-25	3.69095	2.44642	4.27752	9.61836	23.8333	20.4845	20.2019	25.9973	13.8188	-2.03576	0.532319	6.26672e-06	6.68083e-05																		WBGene00002227	klp-17	29.0854	20.892	9.47302	23.8604	33.0676	7.75473	58.3174	5.31664	23.4709	-1.44553	0.513222	0.000189931	0.00211142
WBGene00019814	R02C2.1	65.9174	70.7486	81.2409	72.1168	132.973	105.385	163.811	116.317	101.064	-0.756442	0.190528	6.55071e-06	6.96723e-05																		WBGene00000449	ceh-27	24.2511	64.7188	55.1636	41.13	12.7592	99.0809	32.446	51.7629	47.6641	1.09635	0.384019	0.000193168	0.00214309
WBGene00012255	lpr-6	41.3605	42.2023	13.827	38.6248	6.06686	12.6572	6.51696	5.83162	20.8859	1.92419	0.507913	6.72727e-06	7.12753e-05																		WBGene00021600	Y46H3A.4	32.861	6.5807	14.4161	25.8039	25.7284	8.70887	35.0738	13.79	20.3703	-1.21373	0.424679	0.000194627	0.00215494
WBGene00019272	H42K12.3	37.3562	47.4455	22.7771	26.4362	5.49941	8.62066	13.2916	8.79	21.2771	1.70187	0.445549	6.72889e-06	7.12753e-05																		WBGene00009463	F36D1.4	30.4662	12.9857	11.4455	15.7786	37.1848	10.6741	53.3073	9.53153	22.6717	-1.34324	0.475035	0.000194905	0.00215515
WBGene00006047	ssp-19	46.5329	32.7594	31.7164	50.9398	77.8582	69.618	86.5005	92.7376	61.0829	-0.932357	0.239365	6.75227e-06	7.14812e-05																		WBGene00015348	C02F5.5	92.1499	55.016	52.1882	66.0968	75.6744	33.8739	116.583	43.5386	66.8901	-0.782157	0.265867	0.000197078	0.00217627
WBGene00010925	M153.2	137.499	124.135	103.993	128.497	213.454	174.293	179.253	192.932	156.757	-0.580482	0.143266	6.78383e-06	7.17317e-05																		WBGene00003618	nhr-19	127.807	84.6628	95.857	151.418	222.161	120.217	151.946	92.521	130.824	-0.63364	0.208848	0.000197604	0.00218062
WBGene00002222	klp-11	130.967	134.886	197.335	118.588	91.5491	89.5108	63.0801	63.6802	111.2	0.831787	0.212432	6.84353e-06	7.22368e-05																		WBGene00007977	gska-3	86.1876	50.584	30.4972	66.0768	63.0863	30.0444	69.8236	40.4007	54.5876	-0.776708	0.263619	0.000200136	0.0022071
WBGene00016052	dod-3	321.592	322.781	542.998	294.596	68.6076	48.191	171.906	97.1597	233.479	1.73986	0.459907	7.15169e-06	7.51403e-05																		WBGene00012784	Y43C5A.4	34.1884	15.4021	10.454	24.784	37.0362	11.6168	29.9623	12.7462	22.0238	-1.11885	0.390398	0.000201187	0.00221426
WBGene00003763	nlp-25	29.9739	26.0838	46.0889	54.7491	15.7796	9.66105	11.0356	11.417	25.5986	1.52316	0.39893	7.19008e-06	7.55e-05																		WBGene00016578	sdz-5	83.0432	126.468	112.424	81.6806	46.9505	174.421	61.875	93.546	97.551	0.763207	0.259071	0.000203257	0.0022304
WBGene00013500	Y71A12B.2	90.9075	81.2765	78.7951	66.2457	137.909	132.109	117.41	135.789	105.055	-0.659403	0.165328	7.43999e-06	7.78991e-05																		WBGene00001113	dur-1	169.157	111.871	81.3456	146.986	164.826	136.563	172.734	93.595	134.635	-0.549222	0.178468	0.000207417	0.00226926
WBGene00016956	C55C3.6	37.6118	44.3205	38.9172	31.38	71.8666	89.4618	75.0021	67.968	57.066	-0.889833	0.228822	7.69124e-06	8.02984e-05																		WBGene00017636	F20D6.6	68.5009	46.1896	42.0124	56.9018	64.6645	20.3476	110.046	26.574	54.4046	-0.96593	0.338167	0.000207738	0.00227127
WBGene00018720	F53A3.1	63.3086	66.6463	70.6656	70.0208	32.2677	35.3979	29.9271	37.945	50.7724	0.89899	0.231489	7.89084e-06	8.20052e-05																		WBGene00000478	cfz-2	165.255	242.982	178.134	140.403	100.672	298.639	116.445	168.044	176.322	0.658904	0.220247	0.000211896	0.00231215
WBGene00010473	hrg-2	82.2466	76.4889	108.043	87.8538	31.227	42.9832	60.9019	32.6162	65.2951	0.987963	0.257386	8.15374e-06	8.46405e-05																		WBGene00014169	ZK945.7	165.921	97.894	104.803	111.976	137.944	80.3875	240.177	46.7541	123.232	-0.834189	0.288823	0.000213878	0.00232715
WBGene00013975	ZK455.5	53.8641	48.4731	34.1219	51.6626	81.5783	90.3506	83.0007	103.968	68.3774	-0.856597	0.22123	8.1788e-06	8.48522e-05																		WBGene00019858	R03H10.6	28.058	23.0894	9.48281	42.2131	34.5882	14.5431	41.1161	8.50803	25.1999	-1.16545	0.41266	0.000213973	0.00232715
WBGene00016189	C28G1.4	191.948	195.229	114.567	143.822	248.593	285.431	274.226	249.167	212.873	-0.652752	0.16501	8.28269e-06	8.5832e-05																		WBGene00045415	Y43F8B.15	8.30039	1.09982	3.14828	19.2737	15.4026	0.968775	13.7692	4.25127	8.27675	-2.16067	0.758167	0.000217398	0.0023613
WBGene00000966	dhs-2	159.749	132.955	184.607	135.242	255.968	208.074	224.905	264.227	195.716	-0.582811	0.145546	8.46556e-06	8.74277e-05																		WBGene00008066	fbxb-65	8.30314	34.0923	31.5093	13.7666	11.5472	44.571	5.73156	14.8815	20.5503	1.37484	0.490338	0.000219055	0.00237618
WBGene00006670	twk-16	146.424	132.924	82.872	76.8123	240.767	208.791	175.898	191.136	156.953	-0.812265	0.209403	8.47665e-06	8.74925e-05																		WBGene00008230	pfk-1.2	54.0559	26.3862	22.1455	40.3766	39.9519	17.4546	77.5871	27.6549	38.2016	-0.981281	0.346621	0.000224748	0.00243316
WBGene00010234	ttr-50	2132.84	2127.12	1402.12	1807.68	3072.29	2629.45	3103.82	2832.34	2388.46	-0.586064	0.147207	8.60925e-06	8.87099e-05																		WBGene00006040	ssp-11	442.637	244.219	157.998	278.64	300.932	105.37	461.787	101.838	261.678	-1.07161	0.383661	0.000227712	0.00246202
WBGene00007614	gnrr-2	43.966	40.7151	47.933	51.6665	24.7506	11.8311	14.3871	19.3843	31.8292	1.22855	0.323576	8.88797e-06	9.11283e-05																		WBGene00008228	C50B8.6	256.156	214.483	207.543	255.156	376.809	219.861	414.787	222.087	270.86	-0.511202	0.167186	0.000228196	0.00246565
WBGene00044693	fbxb-92	39.4868	33.8913	26.8079	38.5055	58.7698	74.1522	95.2237	66.9925	54.2287	-0.985977	0.258609	8.8891e-06	9.11283e-05																		WBGene00022705	ZK354.2	106.696	79.6381	68.8483	96.2673	106.496	59.311	157.458	68.5324	92.9059	-0.643126	0.216641	0.000231134	0.00248605
WBGene00008964	mltn-9	153.278	134.01	142.191	136.667	86.8526	72.1544	103.95	86.291	114.424	0.637894	0.16145	9.0612e-06	9.27356e-05																		WBGene00016447	msd-4	556.407	369.75	342.238	446.896	542.733	199.136	828.191	232.356	439.713	-0.883182	0.313033	0.000244056	0.00260641
WBGene00019859	R03H10.7	36.2785	35.8715	27.6226	32.4377	10.0821	9.6807	11.0666	13.2161	22.032	1.40807	0.373356	9.2684e-06	9.44836e-05																		WBGene00004965	spe-11	111.021	102.283	70.3175	116.56	112.434	44.5644	229.464	49.9531	104.575	-0.913096	0.324947	0.00024601	0.00262052
WBGene00012939	subs-4	38.5375	70.8328	44.6861	48.0033	11.8998	17.2208	18.8062	25.5429	34.4412	1.30365	0.346653	9.50974e-06	9.68895e-05																		WBGene00000971	dhs-7	82.0341	130.859	153.538	116.552	90.0132	137.623	90.4267	148.845	118.736	0.51217	0.167071	0.000248279	0.00264129
WBGene00044757	Y55F3BR.11	101.763	111.777	156.935	121.285	56.5253	68.5542	74.2913	74.1856	95.6647	0.773684	0.199819	9.63851e-06	9.80365e-05																		WBGene00017542	F17E9.5	363.169	249.819	224.987	332.346	387.97	102.552	507.911	147.561	289.539	-0.948014	0.339293	0.000249196	0.00264765
WBGene00012101	zip-10	247.825	173.876	436.985	352.46	61.7607	64.3667	63.1785	143.829	193.035	1.65621	0.447422	9.76799e-06	9.91868e-05																		WBGene00016845	C50F7.5	250.07	41.7925	78.7236	269.83	600.64	195.701	559.809	45.7027	255.284	-1.81634	0.685029	0.00024974	0.00265172
WBGene00015601	fbxa-166	14.2849	30.0471	30.8718	36.0535	3.66762	5.37719	11.0678	5.28693	17.0821	1.91303	0.516014	9.95377e-06	0.000100904																		WBGene00006923	vhp-1	722.852	387.408	411.013	628.005	990.964	618.943	1000.02	458.497	652.213	-0.70662	0.243676	0.000252008	0.00267409
WBGene00010350	H01G02.3	251.887	190.258	236.599	216.79	141.618	170.131	120.95	149.964	184.775	0.569948	0.143903	1.03984e-05	0.000105001																		WBGene00007619	C15H11.11	59.3966	31.7525	29.8294	48.8933	48.4767	29.0733	60.8454	22.2611	41.316	-0.792638	0.276642	0.000253747	0.0026891
WBGene00019612	gpcp-1	189.252	181.071	335.168	225.006	391.606	357.216	359.078	485.382	315.472	-0.704938	0.181947	1.04117e-05	0.000105045																		WBGene00009839	fbxa-188	50.8553	27.494	34.6578	66.9974	58.5079	28.0987	56.1738	35.0773	44.7328	-0.756929	0.262865	0.000258354	0.0027323
WBGene00018997	F57B9.3	25.2741	16.4777	16.2483	28.8421	1.83376	4.30181	5.53384	5.28689	12.9748	2.0929	0.562061	1.06099e-05	0.000106899																		WBGene00012605	Y38F1A.1	65.3656	57.1906	31.4828	65.1634	73.1624	35.8447	105.564	31.8845	58.2072	-0.824716	0.291244	0.00026091	0.00275444
WBGene00018297	F41F3.3	22.8631	26.9942	122.544	59.1873	5.53614	0	2.21567	7.05703	30.7996	3.49198	0.956948	1.07998e-05	0.000108692																		WBGene00013234	fbxb-24	73.6297	133.09	111.101	103.715	50.089	179.179	83.8839	130.7	108.173	0.711689	0.246354	0.000260906	0.00275444
WBGene00043702	Y54G2A.7	200.033	207.815	184.39	214.68	135.365	151.328	137.418	107.616	167.331	0.554562	0.140153	1.08837e-05	0.000109415																		WBGene00016322	C32E8.4	88.4792	57.1738	64.6483	77.5474	97.2356	47.4404	123.347	57.5632	76.6793	-0.651608	0.222763	0.000261826	0.00276235
WBGene00016265	trhr-1	226.664	219.209	378.604	298.965	124.561	104.372	163.751	198.206	214.292	0.836288	0.219333	1.09154e-05	0.000109673																		WBGene00019788	M116.1	139.03	201.267	155.311	132.163	71.6232	321.631	103.272	162.61	160.863	0.775964	0.272072	0.000263447	0.00277239
WBGene00019923	fbxc-29	63.7746	63.0241	37.372	42.0431	102.637	114.026	105.127	82.8175	76.3528	-0.876605	0.231524	1.1165e-05	0.000111871																		WBGene00019791	sdz-25	139.03	201.267	155.311	132.163	71.6232	321.631	103.272	162.61	160.863	0.775964	0.272072	0.000263447	0.00277239
WBGene00011826	T18D3.9	27.2217	22.1851	31.6765	24.1841	60.9755	64.3043	60.9917	46.7934	42.2915	-1.01602	0.270228	1.13397e-05	0.000113497																		WBGene00021397	Y38C1AA.6	100.714	61.5818	80.9518	125.731	147.735	62.9927	141.984	102.06	102.969	-0.639836	0.218194	0.000264174	0.00277827
WBGene00010296	dgat-2	480.173	536.959	643.431	662.201	882.092	796.886	1223	1223.93	806.085	-0.749379	0.196162	1.18391e-05	0.000118105																		WBGene00018021	F34D6.1	43.6292	60.4767	61.052	36.7082	29.9907	93.0578	38.8756	62.7369	53.3159	0.765848	0.267831	0.000264844	0.00278355
WBGene00013579	Y79H2A.2	136.819	134.625	184.239	183.404	253.328	215.997	243.577	258.827	201.352	-0.556553	0.141475	1.18931e-05	0.000118514																		WBGene00019090	F59A7.2	147.51	74.8547	90.0859	98.3006	162.859	87.0051	148.978	94.4229	113.002	-0.589209	0.198436	0.000265774	0.00279155
WBGene00020242	phat-5	14.2641	9.68762	18.6948	19.2668	1.83795	3.22557	0	0	8.3721	3.23698	0.84675	1.20516e-05	0.00011983																		WBGene00010920	M117.4	46.7712	19.7903	13.7032	31.2006	37.655	10.6658	27.3974	14.8901	25.2592	-1.06896	0.386134	0.000266598	0.00279843
WBGene00005815	srw-68	7.12939	8.23296	20.7045	42.9657	0.993504	1.01501	1.19846	2.49529	10.5919	3.32493	0.884443	1.23506e-05	0.000122468																		WBGene00019956	fbxb-75	80.9759	111.07	96.6901	84.4331	40.018	179.275	57.2733	121.19	96.3657	0.806936	0.284809	0.000267077	0.00280168
WBGene00019415	K05F6.4	103.334	61.0769	48.7456	61.2732	123.74	132.3	141.654	124.232	99.5444	-0.841831	0.223673	1.25556e-05	0.000124253																		WBGene00016097	C25E10.8	132.272	126.584	105.897	143.252	226.065	109.294	213.581	90.1791	143.391	-0.622783	0.21237	0.000273075	0.00285557
WBGene00018594	aman-3	346.384	425.421	507.83	396.711	247.682	270.35	304.082	320.485	352.368	0.513281	0.129625	1.26471e-05	0.000124999																		WBGene00007341	C05D12.4	90.2869	117.676	111.302	66.08	79.3015	150.177	88.294	123.298	103.302	0.552406	0.184623	0.000274548	0.00286915
WBGene00011305	R186.1	80.1753	94.9622	82.0524	97.3781	56.8715	36.5577	47.5971	48.4685	68.0078	0.807329	0.213171	1.28624e-05	0.000126988																		WBGene00016786	cyp-35A4	40.5143	19.7922	10.5272	35.7904	31.5272	11.6324	24.0088	9.57018	22.9203	-1.13036	0.411727	0.000276547	0.0028864
WBGene00022893	ZK1290.13	115.318	139.534	143.795	126.233	178.874	195.689	193.71	222.075	164.404	-0.537632	0.136969	1.3345e-05	0.000131253																		WBGene00022888	rnh-1.1	38.4397	27.4888	28.4292	39.4609	57.666	9.69409	68.5803	17.0142	35.8467	-1.08613	0.397752	0.00027911	0.00290949
WBGene00019817	R02C2.6	39.5065	68.7694	34.9321	50.5209	92.7077	92.4398	129.533	87.2576	74.4584	-0.943078	0.254124	1.38105e-05	0.000135538																		WBGene00010747	K10D11.3	85.3645	45.0525	52.8773	118.847	68.5964	53.256	81.4392	48.7555	69.2735	-0.696658	0.242032	0.000279828	0.00291514
WBGene00271815	K04A8.21	10.8075	24.1137	11.4037	14.5902	2.78664	1.07196	0	0	8.09671	3.51499	0.913596	1.38491e-05	0.000135844																		WBGene00019922	fbxc-28	204.557	233.128	233.437	179.876	155.415	382.816	190.034	264.726	230.499	0.532075	0.177256	0.000281516	0.00292904
WBGene00021293	Y25C1A.6	188.142	172.111	136.466	179.619	272.431	251.204	274.788	215.199	211.245	-0.539992	0.13847	1.41474e-05	0.000138695																		WBGene00020543	fbxb-83	67.4672	122.071	102.947	76.1745	50.8038	141.469	68.7659	82.9131	89.0765	0.662092	0.229216	0.000287859	0.00298193
WBGene00018760	irg-3	125.635	92.317	121.961	104.671	195.115	163.208	158.323	179.504	142.592	-0.590626	0.15285	1.43621e-05	0.000140648																		WBGene00013809	Y116A8C.33	58.832	35.7005	36.311	50.9969	68.0098	12.9724	79.7306	33.9316	47.0606	-0.930326	0.337626	0.000291931	0.00302222
WBGene00018307	dyla-1	23.0176	26.1349	25.1826	22.8732	62.4803	61.2392	57.5872	39.6726	39.7734	-1.04914	0.284915	1.47162e-05	0.00014396																		WBGene00009297	sdz-16	109.008	153.958	107.206	69.749	79.2642	190.906	83.6137	126.507	115.026	0.6507	0.225283	0.000294819	0.00304641
WBGene00044283	spp-22	51.0794	69.3965	64.9966	60.5311	91.591	111.383	113.073	110.456	84.0632	-0.710938	0.187624	1.48673e-05	0.000145282																		WBGene00000652	col-76	270.121	349.656	282.196	235.848	200.674	433.329	189.732	277.546	279.888	0.507018	0.168278	0.000296038	0.00305666
WBGene00001103	dsl-1	73.3585	49.3376	43.8648	37.3472	81.8486	97.7264	131.82	104.053	77.4195	-0.917913	0.248488	1.52207e-05	0.000148496																		WBGene00019548	K09C4.2	7.23015	3.3005	2.07514	9.17925	12.3835	1.93356	27.8505	0	7.99407	-2.41892	0.887268	0.000298468	0.0030726
WBGene00009495	hrg-6	17.7872	30.046	34.2155	17.805	48.7051	58.423	79.234	58.2668	43.0603	-1.13447	0.311074	1.57447e-05	0.000153525																		WBGene00010907	M88.4	43.6061	71.4795	66.2259	34.8743	36.1663	61.0531	34.3554	61.6602	51.1776	0.6827	0.238075	0.00029925	0.00307874
WBGene00017752	sdz-15	41.7621	47.4976	50.37	43.2596	88.9287	77.4361	96.2862	74.8959	65.0545	-0.786402	0.21055	1.60575e-05	0.000156324																		WBGene00016309	sdz-4	101.732	117.67	123.994	79.8448	66.9589	214.154	69.8877	114.808	111.131	0.715157	0.251609	0.000300066	0.00308522
WBGene00016577	clec-3	17.5992	22.3051	23.5609	14.4112	45.8069	46.2623	53.1126	42.2867	33.1681	-1.10737	0.302709	1.61089e-05	0.00015674																		WBGene00009377	F34D10.8	99.3212	68.9654	59.6707	65.4749	116.56	47.4884	187.277	51.9241	87.0851	-0.863307	0.312673	0.000300746	0.00308838
WBGene00011424	dhs-31	42.7811	43.5766	34.9316	51.7386	90.9029	90.2754	66.4337	80.2132	62.6067	-0.839774	0.226574	1.61508e-05	0.000157064																		WBGene00010474	K01D12.15	60.6415	45.0275	27.8336	52.4965	56.8301	28.055	74.7242	23.3453	46.1192	-0.816628	0.292855	0.00030217	0.00309725
WBGene00011049	sdz-26	147.279	143.469	112.927	134.577	179.678	214.032	220.236	194.726	168.366	-0.540037	0.13971	1.62878e-05	0.000158198																		WBGene00003463	msp-76	681.487	457.929	349.741	502.756	586.56	239.77	963.879	256.761	504.86	-0.888903	0.32367	0.000303256	0.00310453
WBGene00009361	F33E2.5	243.526	259.524	141.351	220.188	350.754	308.442	395.28	342.889	282.744	-0.632911	0.166588	1.62921e-05	0.000158198																		WBGene00021719	fbxb-104	50.8586	79.1816	72.4783	58.7371	36.1796	156.97	49.286	82.9123	73.3255	0.846888	0.305288	0.000303662	0.00310485
WBGene00000986	dhs-23	61.4927	45.5369	71.4947	58.9103	21.1009	32.2568	25.4587	29.0834	43.1668	1.02065	0.278623	1.62935e-05	0.000158198																		WBGene00020865	T27E4.7	200.654	124.349	116.561	184.53	294.596	175.099	311.557	180.443	198.474	-0.622455	0.215063	0.000304367	0.00310822
WBGene00008483	E04D5.4	65.8719	58.4909	48.2002	88.5824	33.2113	29.5474	30.5902	21.9519	47.0558	1.04863	0.288586	1.68475e-05	0.000163314																		WBGene00009041	cut-3	9.34517	19.7939	24.1843	19.2725	5.38575	117.267	13.7378	36.1472	30.6417	1.68575	0.644417	0.000304768	0.0031104
WBGene00021731	Y49G5A.1	37.0092	21.2169	47.9238	59.2675	72.0775	106.086	109.785	87.4159	67.5977	-1.05479	0.290822	1.69426e-05	0.000164149																		WBGene00019859	R03H10.7	34.2652	14.2956	10.5146	33.9563	26.1598	14.5371	30.9112	12.7578	22.1747	-1.0443	0.382089	0.000305365	0.00311458
WBGene00010522	K03A11.5	134.18	150.308	159.239	142.922	96.2029	105.43	92.9493	83.6943	120.616	0.583612	0.152591	1.74151e-05	0.000168547																		WBGene00006718	ubc-23	134.962	80.278	79.8778	110.13	133.903	79.4633	96.2143	59.5324	96.7952	-0.575166	0.196107	0.0003114	0.00317027
WBGene00009221	acs-2	1355.23	1154.12	1673.74	1570.17	549.829	644.874	968.915	860.413	1097.16	0.831772	0.225999	1.788e-05	0.000172771																		WBGene00010495	K02B12.2	128.576	177.092	158.213	133.088	89.4051	254.709	111.502	157.257	151.23	0.595689	0.204654	0.000312424	0.00317679
WBGene00044798	tbx-43	23.029	23.2371	10.5606	13.2382	52.3511	38.6848	47.6142	44.0759	31.5989	-1.23465	0.343747	1.80076e-05	0.000173911																		WBGene00006053	ssq-4	650.893	416.79	229.088	397.388	581.062	196.714	908.473	228.556	451.12	-1.02632	0.382342	0.000313189	0.00318085
WBGene00013838	fbxa-31	106.504	132.733	145.418	135.875	69.7298	89.2338	86.3446	66.9785	104.102	0.675901	0.180317	1.85702e-05	0.000179059																		WBGene00011432	sdz-30	434.331	612.433	581.445	468.937	258.295	937.49	349.603	655.088	537.203	0.743619	0.264904	0.000315488	0.00320009
WBGene00021977	Y58A7A.3	2247.39	2448.14	4017.9	3500.55	1197.63	1199.71	1812.48	1602.54	2253.29	0.956235	0.263559	1.91355e-05	0.000184243																		WBGene00010381	H12D21.5	21.6738	5.50368	7.25515	14.6968	14.7253	1.93386	22.0948	4.24392	11.5159	-1.5992	0.598671	0.000317258	0.00321607
WBGene00017764	F25A2.1	54.8282	56.1548	48.7411	43.3268	15.6142	33.3113	17.7171	13.2229	35.3645	1.20787	0.337683	1.91383e-05	0.000184243																		WBGene00009895	scl-2	198.39	231.39	375.487	246.232	245.022	370.974	182.576	327.909	272.247	0.502464	0.167602	0.000318675	0.00322649
WBGene00015258	B0554.5	95.7471	76.635	68.2467	92.4375	32.9663	51.6525	47.5739	38.7586	63.0022	0.861709	0.236346	1.96215e-05	0.000188296																		WBGene00009043	F22B5.5	70.568	51.6896	27.2995	51.3956	61.5946	29.0663	98.6187	20.1952	51.3034	-0.940392	0.346559	0.000321236	0.00324416
WBGene00017781	F25E2.3	107.652	97.8789	125.923	98.5677	174.257	170.973	174.884	147.162	137.162	-0.56911	0.14973	1.98749e-05	0.000190426																		WBGene00015601	fbxa-166	13.4957	10.9971	9.45834	28.4503	29.2446	8.72142	34.3659	4.25225	17.3732	-1.36242	0.512	0.000323231	0.00325867
WBGene00019035	fbxb-26	58.2051	34.8827	25.9967	30.0566	90.8166	74.1884	97.4097	66.0944	59.7063	-1.01853	0.284377	2.07216e-05	0.000197704																		WBGene00019743	nhr-203	131.905	103.363	115.74	144.999	179.981	115.344	195.616	96.7572	135.463	-0.514617	0.173051	0.000324679	0.00327128
WBGene00021611	nhr-238	99.9556	122.969	108.115	76.9383	55.0052	57.9929	45.4741	64.3212	78.8464	0.784365	0.213598	2.09674e-05	0.000199944																		WBGene00019561	K09C6.7	149.521	111.029	67.4033	97.0697	123.888	46.4765	221.821	66.1086	110.415	-0.8518	0.31155	0.000326779	0.00328844
WBGene00010411	H25K10.1	13.1965	31.9991	17.0612	16.8157	51.3132	57.0159	61.9679	37.8836	35.9066	-1.22267	0.34491	2.16939e-05	0.000206115																		WBGene00013583	ceh-51	32.1608	87.9872	52.4581	54.1503	24.6472	92.029	29.8419	62.7036	54.4973	0.889444	0.325552	0.000329138	0.00331016
WBGene00018766	F53G2.1	26.4464	21.3558	11.375	20.3903	56.7161	44.1418	53.0899	41.3905	34.3632	-1.16342	0.328489	2.18863e-05	0.000207509																		WBGene00021288	clec-123	88.3276	48.3782	76.9087	91.7679	79.1723	34.9027	151.918	42.5395	76.7394	-0.844875	0.309546	0.000336189	0.00337085
WBGene00020583	T19D12.9	80.3261	79.538	77.1833	78.0407	47.6246	39.8128	37.6181	47.569	60.9641	0.7714	0.210639	2.22328e-05	0.000210449																		WBGene00018253	F40H6.1	55.8841	24.211	27.0991	42.2331	40.9505	19.351	64.739	28.6662	37.8917	-0.855063	0.313606	0.000345802	0.00344845
WBGene00018413	cyp-33C4	173.858	183.326	175.49	156.081	134.63	102.222	113.961	95.1378	141.838	0.572564	0.151806	2.22427e-05	0.000210449																		WBGene00021773	fbxb-42	48.7659	73.6876	57.7217	48.643	21.5631	113.348	30.9786	73.335	58.5054	0.906625	0.335642	0.000348322	0.00347148
WBGene00009876	F49C12.6	173.513	167.629	183.602	189.96	103.661	116.12	120.656	136.596	148.967	0.531413	0.139952	2.27805e-05	0.0002152																		WBGene00017382	F11D5.5	14.5327	30.7922	47.2826	22.944	17.7023	41.6674	22.9158	47.8363	30.7092	0.917394	0.338738	0.000349893	0.00348505
WBGene00002163	ist-1	159.002	140.744	234.214	160.214	267.253	255.203	278.312	287.812	222.844	-0.583131	0.155133	2.28031e-05	0.000215302																		WBGene00018245	F40G9.9	28.033	56.0837	68.3318	46.8049	34.6265	87.2196	45.8045	74.4181	55.1653	0.743985	0.267936	0.000350485	0.00348884
WBGene00003617	nhr-18	156.051	160.906	200.667	203.087	106.352	116.152	132.81	111.904	148.491	0.572911	0.1524	2.30729e-05	0.000217623																		WBGene00018531	F47B3.7	103.83	69.2794	74.646	81.679	103.105	32.9502	169.459	49.9672	85.6145	-0.840339	0.309959	0.00035458	0.00352325
WBGene00021533	Y42G9A.3	557.962	569.438	842.769	734.783	463.133	374.866	469.888	515.716	566.07	0.520423	0.136931	2.32333e-05	0.000218909																		WBGene00003466	msp-79	717.305	541.501	360.95	614.121	591.427	279.332	957.412	319.406	547.682	-0.782547	0.286627	0.000360798	0.0035786
WBGene00013234	fbxb-24	77.8266	109.383	52.8021	87.8803	135.978	134.299	186.047	149.871	116.761	-0.796673	0.2206	2.41402e-05	0.000226631																		WBGene00021336	Y34F4.1	133.549	103.199	71.8383	143.439	125.43	98.9314	167.564	98.6074	117.82	-0.520239	0.177869	0.000367507	0.00364078
WBGene00005833	srw-86	3.27416	12.5781	8.15186	7.28442	0	0	0	0	3.91107	5.7564	2.54723	2.46084e-05	0.000230907																		WBGene00012012	T25B9.6	41.4513	32.8902	31.5241	50.5573	54.4122	20.3027	78.566	10.6049	40.0386	-1.01712	0.385039	0.000371726	0.00367598
WBGene00044281	R04A9.7	61.6267	64.9922	43.8728	75.6337	98.9038	106.531	120.596	106.587	84.8429	-0.740265	0.204091	2.50109e-05	0.000234563																		WBGene00003465	msp-78	803.988	552.619	410.673	609.49	732.453	271.634	1250.68	303.462	616.875	-0.941846	0.354487	0.000372411	0.00368001
WBGene00000968	dhs-4	128.459	106.572	119.421	109.425	165.155	179.54	156.086	204.462	146.14	-0.552181	0.147102	2.51761e-05	0.00023599																		WBGene00003429	msp-31	536.627	371.488	318.553	402.435	544.691	197.344	769.059	219.677	419.984	-0.84713	0.315796	0.000372578	0.00368001
WBGene00021517	Y41D4B.15	14.2885	14.5422	8.12573	16.8275	0.917034	1.07567	0	1.76263	7.19241	3.32457	0.898717	2.55379e-05	0.000239134																		WBGene00022589	ZC317.6	104.844	57.1854	86.1605	97.2824	108.522	29.0704	167.282	63.7819	89.2662	-0.841513	0.312899	0.00037662	0.0037155
WBGene00009299	F31E9.6	121.877	120.139	120.234	126.255	70.6469	76.3327	81.9166	81.0791	99.81	0.594676	0.160263	2.64906e-05	0.000247291																		WBGene00010563	K04G2.4	102.706	86.8875	69.2433	110.136	98.5899	61.0295	125.11	53.1385	88.3551	-0.586132	0.20559	0.000379968	0.00373963
WBGene00043980	F11D5.7	53.9686	63.0804	47.124	63.5912	123.544	150.699	65.2638	123.303	86.3218	-0.913606	0.258296	2.75294e-05	0.000256461																		WBGene00011214	R10E9.2	386.94	258.466	203.502	300.123	359.726	112.368	536.116	131.78	286.128	-0.957509	0.363235	0.000384656	0.00377902
WBGene00009927	F52B11.5	73.0912	69.5256	69.8534	90.5794	40.5838	41.8259	42.1212	38.8325	58.3016	0.791499	0.220896	2.81926e-05	0.000262236																		WBGene00007601	C15C6.2	375.576	248.703	213.038	300.093	335.732	128.839	618.339	147.722	296.005	-0.939433	0.356185	0.000390595	0.00383189
WBGene00009061	pals-14	25.2552	38.7556	25.9966	30.0595	7.33958	13.9767	9.96269	7.05027	19.7995	1.46141	0.423151	2.84547e-05	0.000264392																		WBGene00206368	Y39F10C.3	15.3838	1.09584	0	7.32373	6.95677	0	11.5999	2.11285	5.55912	-3.0464	1.07703	0.00039073	0.00383189
WBGene00206519	F36H5.13	21.9977	24.2438	17.8737	14.4118	44.8931	47.337	86.3092	36.1204	36.6483	-1.26469	0.36583	2.84698e-05	0.000264392																		WBGene00013858	ssp-34	182.494	138.712	93.138	119.477	150.498	50.2761	261.922	60.4723	132.124	-0.874228	0.328831	0.000391742	0.00383953
WBGene00008799	F14E5.1	38.5087	33.9474	36.5604	33.6198	79.6861	76.3947	56.4285	64.3075	52.4316	-0.85157	0.239161	2.84826e-05	0.000264392																		WBGene00012294	nspa-8	95.5299	64.0035	47.7156	68.3181	87.611	53.4159	123.321	48.8554	73.5963	-0.673562	0.242867	0.000393453	0.00385174
WBGene00017718	F22F4.5	99.407	77.3007	99.0984	108.586	145.574	128.759	168.476	172.915	125.014	-0.618123	0.168622	2.89646e-05	0.000268455																		WBGene00003457	msp-64	397.637	271.839	228.361	308.903	352.512	150.817	601.476	175.083	310.829	-0.832315	0.31136	0.000396342	0.00387316
WBGene00000177	aqp-9	138.223	132.67	115.356	126.334	191.898	167.658	184.905	204.498	157.693	-0.505799	0.134814	2.92521e-05	0.000270843																		WBGene00002204	kin-21	14.545	6.59729	5.26491	19.2716	13.0707	0.969418	27.4307	5.31698	11.5583	-1.65317	0.644465	0.000402476	0.00392616
WBGene00021978	Y58A7A.4	77.1888	67.9753	251.88	221.788	26.5134	50.6154	23.223	26.4157	93.2	1.99868	0.593004	2.95342e-05	0.000273176																		WBGene00043743	Y59E9AL.2	646.771	414.587	335.264	438.685	631.051	188.966	943.857	245.57	480.594	-0.957852	0.365975	0.000404136	0.00394002
WBGene00010525	K03B8.8	103.981	131.586	82.0981	94.0964	173.156	196.584	136.381	178.28	137.02	-0.661609	0.182349	3.00144e-05	0.000277195																		WBGene00016358	C33F10.12	119.421	79.1744	57.8452	76.1716	90.0091	48.4596	154.51	47.8437	84.1793	-0.756949	0.280153	0.000407894	0.00396774
WBGene00013721	Y106G6H.9	49.3252	40.655	36.5555	31.2994	71.6665	78.4302	93.0247	64.3573	58.1642	-0.849794	0.240222	3.02727e-05	0.000279154																		WBGene00015178	B0416.2	13.4604	1.10032	1.04382	12.8521	7.72168	2.90351	10.388	1.06193	6.31647	-2.30981	0.86099	0.000415148	0.00401665
WBGene00009706	argk-1	29.6739	31.0193	33.3092	21.6294	7.33416	7.52859	9.96058	12.3357	19.0989	1.43945	0.416603	3.03847e-05	0.000280045																		WBGene00015602	fbxa-158	13.4707	2.20628	1.05419	16.4888	12.2905	3.86899	12.5771	4.26551	8.27776	-1.83334	0.702931	0.000421394	0.00406995
WBGene00020004	R11E3.2	116.696	104.785	83.6844	98.4172	174.857	176.502	167.049	128.599	131.324	-0.616665	0.169346	3.13986e-05	0.000288074																		WBGene00044304	F52B10.3	30.7714	131.317	73.6031	19.4107	16.9535	58.8105	20.054	16.8168	45.9671	1.31438	0.534767	0.000425503	0.00410246
WBGene00015751	C14A11.6	71.4793	50.2119	45.5048	54.9665	114.285	116.618	76.2078	101.475	78.8435	-0.792083	0.223775	3.2249e-05	0.000295131																		WBGene00017781	F25E2.3	101.723	58.2859	72.4891	92.6941	119.307	67.8287	93.9709	62.7172	83.627	-0.549724	0.192855	0.000430491	0.00413611
WBGene00002112	ins-29	87.1545	58.8303	87.3251	87.5976	39.8618	51.4449	27.6653	40.6052	60.0606	0.890374	0.253902	3.26907e-05	0.000298873																		WBGene00008451	E01G6.3	39.4939	80.2614	52.6985	40.3773	27.6664	55.2669	36.5347	78.7031	51.3753	0.744046	0.276029	0.000434074	0.0041657
WBGene00008553	F07C6.2	123.439	119.477	99.1703	122.445	75.0975	73.8929	58.7807	73.3114	93.2018	0.643763	0.177929	3.31134e-05	0.000301977																		WBGene00010884	M7.8	106.823	71.4938	80.7212	110.139	146.4	79.4231	114.883	81.823	98.9632	-0.525653	0.183157	0.000435936	0.00417873
WBGene00044207	Y6G8.5	15.6188	12.211	7.49347	28.5191	1.54166	2.70243	0.928814	1.6006	8.82699	2.80637	0.809275	3.33423e-05	0.000303672																		WBGene00012357	W09D6.4	44.4454	38.5263	23.8985	47.7493	52.6277	21.2785	92.7763	24.4064	43.2136	-0.927373	0.35634	0.000440654	0.00422151
WBGene00018529	F47B3.5	9.8702	5.81536	4.07031	9.6622	0	0	0	0	3.67726	5.60666	2.53185	3.36353e-05	0.000305968																		WBGene00011171	R09E10.1	33.1442	14.8013	11.8976	24.5867	28.1225	8.98414	30.728	12.0464	20.5389	-1.05063	0.404767	0.000442065	0.00423207
WBGene00001564	icl-1	10631.3	10361.5	13591.5	11521.6	6349.01	6086.13	8500.49	8426.67	9433.52	0.589357	0.161458	3.44287e-05	0.000312247																		WBGene00018311	F41G4.8	90.2259	84.6932	76.5204	122.989	122.519	60.0505	124.088	72.2581	94.168	-0.554337	0.195868	0.000444291	0.00424653
WBGene00022435	cfap-36	74.2736	67.7106	60.4765	54.4349	101.139	126.43	100.356	104.489	86.1637	-0.672514	0.187732	3.48187e-05	0.000314841																		WBGene00017026	ipla-4	94.5479	42.8819	63.1878	67.9091	80.725	34.9	95.9918	51.0442	66.3985	-0.68315	0.251171	0.000447497	0.00427224
WBGene00000615	col-38	217.151	182.033	289.199	291.223	130.408	164.417	160.556	156.907	198.987	0.612801	0.169183	3.48477e-05	0.000314947																		WBGene00007190	rmd-3	195.932	173.8	148.701	198.258	189.652	98.7738	323.219	73.3093	175.205	-0.724844	0.270413	0.000454737	0.00433387
WBGene00019041	fbxc-22	25.2864	21.3297	21.1232	24.0269	50.4081	40.875	56.4387	50.2205	36.2136	-0.984331	0.284505	3.52472e-05	0.000318241																		WBGene00008615	F09C6.1	21.7485	3.30069	7.31192	22.949	16.9819	7.74341	21.9154	8.49647	13.8059	-1.31753	0.515635	0.000455963	0.00434306
WBGene00010573	K04H4.2	32.1449	45.6596	19.5162	8.2367	6.31053	4.74924	4.87792	6.08145	15.9471	1.9544	0.582485	3.6784e-05	0.000330801																		WBGene00012979	Y48B6A.5	24.9254	6.59773	15.7803	22.9431	34.6142	4.84622	38.9012	14.8854	20.4367	-1.23917	0.489514	0.000458645	0.00435994
WBGene00019388	K04F1.9	148.127	157.279	148.422	148.814	96.8993	94.3446	104.294	108.652	125.854	0.523177	0.142387	3.77423e-05	0.000338276																		WBGene00020363	fbxa-3	36.3206	24.1953	15.7484	45.8891	48.5077	19.3772	35.552	21.2579	30.856	-0.868156	0.329797	0.000458934	0.00435994
WBGene00000220	atf-2	59.4004	58.1887	24.3734	45.6339	13.7415	23.6695	14.3845	14.0954	31.6859	1.31863	0.392125	3.84605e-05	0.000344174																		WBGene00015610	C08F1.6	134.832	181.483	142.59	108.303	75.507	272.176	101.083	141.333	144.663	0.683212	0.252304	0.000460132	0.0043677
WBGene00021275	dmsr-2	105.64	103.79	103.182	129.663	59.5282	69.9429	68.5969	70.4718	88.8519	0.642602	0.179726	3.86014e-05	0.000345265																		WBGene00009927	F52B11.5	69.3394	44.0197	37.5242	66.1038	66.4459	42.5727	86.6975	45.654	57.2947	-0.636843	0.231859	0.000465531	0.00441642
WBGene00001468	flr-4	195.01	210.627	124.311	179.936	121.682	114.115	64.1528	74.8577	135.586	0.813286	0.234118	4.00266e-05	0.000357309																		WBGene00013646	Y105C5B.3	60.2224	20.8937	33.6449	50.4757	65.4011	21.3209	35.4929	27.6416	39.3867	-0.855591	0.325914	0.000466341	0.00442157
WBGene00009110	F25D1.5	249.057	232.433	208.779	178.053	124.856	167.667	140.611	145.436	180.862	0.534871	0.146752	4.03537e-05	0.000359698																		WBGene00023490	F36A2.14	76.8026	56.0876	39.9099	67.9151	64.6659	41.6638	105.466	35.0775	60.9486	-0.713003	0.265935	0.000469128	0.00444518
WBGene00011821	cdf-2	64.016	54.7081	47.2911	61.3084	86.9765	130.168	79.2754	168.053	86.4746	-0.901084	0.263348	4.04455e-05	0.00036034																		WBGene00022780	ZK622.1	28.0391	19.7934	7.36288	28.4495	23.8473	6.78448	42.3421	9.5689	20.7735	-1.21057	0.480332	0.000469369	0.00444518
WBGene00044672	fbxa-4	161.417	197.656	135.67	177.95	120.183	102.139	102.947	103.11	137.634	0.582389	0.161604	4.0706e-05	0.000362128																		WBGene00013987	ZK512.8	106.619	71.5274	70.9131	85.3803	88.8282	40.6446	132.857	50.9681	80.9672	-0.681556	0.252699	0.000471657	0.00445982
WBGene00020491	T13G4.4	150.363	109.457	116.17	134.71	203.752	166.615	208.132	187.731	159.616	-0.536876	0.147781	4.13003e-05	0.000366338																		WBGene00008177	C48D1.1	98.6236	127.916	143.556	110.991	58.5248	209.389	79.327	124.283	119.076	0.671899	0.247782	0.000471776	0.00445982
WBGene00016789	djr-1.2	26.1353	28.9383	18.6807	14.5116	4.6188	4.28705	7.76221	5.29713	13.7789	1.75016	0.524817	4.16696e-05	0.000368894																		WBGene00022495	fbxa-78	46.6606	18.6992	16.7642	61.4956	26.2049	28.0858	57.4754	18.0633	34.1812	-0.993262	0.387631	0.000473751	0.00447389
WBGene00017912	fbxb-107	16.4503	22.2697	16.2471	10.8308	45.0013	32.2382	65.3302	36.1418	30.5637	-1.24469	0.37074	4.2408e-05	0.000375065																		WBGene00010612	K07A1.5	51.8875	41.7917	38.848	48.6424	70.835	20.3462	104.356	24.4467	50.1442	-0.92729	0.360307	0.000474078	0.00447443
WBGene00003099	lys-10	9.84464	10.6361	9.74761	10.8495	28.5316	20.3969	37.6725	35.2786	20.3697	-1.37124	0.409572	4.29859e-05	0.000379622																		WBGene00020620	T20D4.15	22.7749	5.50202	6.25835	16.5251	22.3979	6.77437	25.41	10.6187	14.5327	-1.27329	0.502559	0.000482031	0.0045346
WBGene00022412	Y102A11A.2	145.3	116.633	123.078	122.818	87.6884	86.9677	67.2568	74.7882	103.066	0.609209	0.170599	4.30677e-05	0.000380144																		WBGene00009471	F36D3.5	38.4794	20.8874	15.8356	29.3637	43.0022	12.6088	69.5125	25.532	31.9027	-1.0266	0.405252	0.000492993	0.00462922
WBGene00044197	fbxb-63	21.9072	30.9639	21.9327	42.1539	50.5629	66.5939	67.5647	64.3664	45.7557	-0.970982	0.286186	4.30869e-05	0.000380144																		WBGene00017961	nhr-180	99.6733	56.0837	54.6657	110.129	81.5643	73.6522	109.93	64.8501	81.3186	-0.572655	0.206442	0.000496418	0.00465191
WBGene00009089	jmjd-3.2	148.867	158.287	66.6265	117.486	202.046	239.079	249.922	206.042	173.545	-0.773949	0.224012	4.42351e-05	0.000388764																		WBGene00007308	C04G2.9	1312.6	895.109	706.776	985.642	1129.33	453.584	1772.82	533.724	973.699	-0.824418	0.318037	0.000497284	0.00465631
WBGene00018274	F41C3.8	112.515	99.6155	143.505	128.367	73.2283	62.2396	77.3252	78.2707	96.8832	0.657399	0.186058	4.44235e-05	0.00038986																		WBGene00015382	C03B1.14	116.142	103.394	98.5084	155.115	137.178	68.7644	136.762	88.1942	113.007	-0.518712	0.183318	0.000499174	0.00466945
WBGene00001820	ham-1	107.929	123.244	83.6855	101.992	149.178	163.611	215.706	152.37	137.214	-0.634015	0.179279	4.4429e-05	0.00038986																		WBGene00008259	C52E4.7	38.3913	26.3954	18.8921	31.2049	46.975	10.6568	65.3937	21.2568	32.3957	-1.00543	0.396716	0.000499252	0.00466945
WBGene00003693	nhr-103	114.283	129.883	133.236	115.368	72.4334	70.9798	89.6483	79.3034	100.642	0.597928	0.167437	4.47403e-05	0.000391688																		WBGene00021428	Y38F2AR.10	43.4302	18.7096	26.001	49.5773	43.3175	28.0515	52.1471	24.4106	35.7056	-0.780098	0.296889	0.000510973	0.00476026
WBGene00016282	C31B8.7	115.527	127.061	114.556	130.877	89.7609	80.6988	65.2799	60.7837	98.0679	0.641734	0.181614	4.54308e-05	0.00039735																		WBGene00019591	fbxc-25	51.928	60.4792	69.4339	40.3798	25.3837	135.694	22.8829	56.3518	57.8167	0.975962	0.385433	0.000515867	0.00479507
WBGene00016578	sdz-5	87.8888	86.2546	49.5569	64.9056	131.14	111.836	147.209	118.961	99.719	-0.732765	0.211113	4.55174e-05	0.000397724																		WBGene00012822	Y43F8B.12	16.5262	4.40283	1.03758	15.6115	30.9805	5.80291	15.1004	8.48747	12.2437	-1.60296	0.647285	0.000518106	0.00481189
WBGene00013516	Y73F4A.3	127.595	142.876	144.571	141.344	87.649	105.085	89.7951	82.0872	115.125	0.555867	0.155037	4.74183e-05	0.000412746																		WBGene00019461	K07A3.3	53.2209	35.3452	23.2657	29.2071	63.8667	24.3441	98.0528	14.7297	42.754	-1.06568	0.426991	0.00051896	0.00481361
WBGene00015781	C14F11.6	54.1604	38.9094	23.0498	49.7834	10.8062	13.293	21.7323	6.90377	27.3298	1.44403	0.440701	4.77772e-05	0.000415671																		WBGene00022076	daao-1	24.9079	45.0904	72.4602	33.9577	11.5481	41.6629	30.9559	73.3425	41.7407	0.983609	0.390303	0.000519024	0.00481361
WBGene00016788	C49G7.10	566.033	634.2	1079.2	1128.51	301.768	275.307	447.389	431.738	608.019	1.07302	0.322005	4.89581e-05	0.000424927																		WBGene00016541	C39H7.1	382.957	274.942	184.823	287.264	330.278	151.149	530.847	132.867	284.391	-0.850133	0.331857	0.000522177	0.00483473
WBGene00013976	hizr-1	60.4997	47.5204	43.0596	60.0451	81.5336	95.7536	87.4136	102.192	72.2522	-0.720084	0.208434	4.97827e-05	0.00043126																		WBGene00012449	nhr-231	56.0785	31.8894	23.1407	51.3927	70.7725	39.7378	58.3628	32.9596	45.5417	-0.735415	0.278455	0.00052577	0.00485985
WBGene00019414	fbxb-51	26.3496	27.1269	18.6849	21.645	56.8883	43.003	64.2061	43.1841	37.636	-1.00387	0.299959	5.06392e-05	0.000437429																		WBGene00001500	ftn-1	28.9882	8.80273	11.4785	15.6063	44.0201	14.5167	40.4116	11.6806	21.9381	-1.18292	0.475648	0.000531666	0.00490614
WBGene00015371	C03A7.13	100.152	77.606	124.307	128.45	201.457	149.579	198.039	162.08	142.709	-0.647327	0.185281	5.10398e-05	0.00044068																		WBGene00016125	C26B2.2	43.5468	16.4995	9.42817	22.9463	26.2073	8.71597	34.4925	14.8752	22.089	-1.09693	0.439332	0.000532289	0.00490915
WBGene00018543	ugt-32	92.4549	111.563	118.62	142.848	51.2767	48.4262	81.8695	73.1112	90.0211	0.769831	0.224744	5.13872e-05	0.000443047																		WBGene00001820	ham-1	101.835	171.523	125.369	116.545	79.1732	264.677	97.0933	130.808	135.878	0.676748	0.254242	0.000535062	0.0049291
WBGene00044797	F13E9.13	58.1173	52.2818	38.1805	31.2918	68.8867	96.7097	89.6933	90.7976	65.7448	-0.829659	0.244304	5.1704e-05	0.000445567																		WBGene00019783	M70.1	54.1206	38.6251	34.6264	55.7615	45.2007	15.5757	86.6261	18.1523	43.5861	-0.951319	0.378314	0.000539084	0.00495802
WBGene00219423	C23H5.15	67.6557	80.1592	95.0334	94.1832	44.2624	56.8463	44.3372	40.5949	65.384	0.764915	0.223464	5.29027e-05	0.000455033																		WBGene00019868	R04B3.3	72.7425	21.99	31.6087	56.896	45.3495	31.9946	53.6808	34.032	43.5367	-0.761701	0.291968	0.000541404	0.00497108
WBGene00010752	K10G4.3	51.2635	32.8253	62.5443	73.6837	10.1474	15.0129	28.8218	25.596	37.4869	1.2777	0.390073	5.3063e-05	0.000456196																		WBGene00022469	Y119C1B.3	38.755	20.5092	14.5489	35.1594	44.1586	21.888	42.6484	21.4826	29.8938	-0.845828	0.328328	0.000543826	0.00498778
WBGene00001068	dpy-6	110.351	129.204	134.881	115.031	187.308	202.52	158.11	177.839	151.906	-0.509985	0.141837	5.3304e-05	0.000457618																		WBGene00012859	Y45F3A.1	90.346	70.377	41.019	70.6652	105.393	43.614	92.7019	53.16	70.9095	-0.657999	0.246619	0.000546085	0.00500573
WBGene00017343	F10E7.1	34.1343	39.7835	21.1244	30.0014	61.328	60.2734	73.0116	59.0125	47.3336	-0.901748	0.268738	5.37832e-05	0.000461296																		WBGene00009539	F38C2.7	43.5205	82.5085	76.3496	40.3882	45.5132	69.7073	52.9818	70.1095	60.1348	0.599687	0.2207	0.000548159	0.00501783
WBGene00015465	C05C8.8	9.89654	13.5748	5.68705	13.2131	35.7384	33.3478	29.878	24.6688	20.7506	-1.35845	0.416917	5.57338e-05	0.000475714																		WBGene00022741	ZK430.5	183.039	239.655	193.198	156.912	144.363	353.047	111.673	192.555	196.805	0.6	0.220809	0.000548313	0.00501783
WBGene00009544	F38E11.9	82.5767	78.5568	75.7523	64.5416	110.234	122.178	119.02	123.898	97.0947	-0.586443	0.166714	5.57784e-05	0.000475714																		WBGene00044298	T23B7.2	16.5355	2.19652	0	12.8281	9.24881	4.83011	13.8252	2.11987	7.69801	-1.99365	0.796082	0.000547862	0.00501783
WBGene00011073	R07A4.2	68.9367	51.256	64.9845	67.4937	29.4431	34.3574	17.7266	37.9215	46.5149	0.937076	0.280186	5.62604e-05	0.000479375																		WBGene00003469	msp-142	350.456	282.903	203.813	244.511	295.599	178.853	484.38	184.634	278.144	-0.579981	0.213073	0.000551926	0.00504809
WBGene00044402	Y82E9BL.18	64.6986	48.4099	58.4894	62.5822	30.3093	24.715	18.8244	36.1425	43.0214	0.940044	0.281463	5.75005e-05	0.000489023																		WBGene00022002	Y59E9AR.7	1246.48	905.919	727.642	992.13	1243.81	469.823	1854.91	506.139	993.356	-0.840277	0.331672	0.000571165	0.00519823
WBGene00021893	ndnf-1	106.832	81.5175	151.934	109.188	172.967	168.996	238.934	186.717	152.136	-0.679019	0.197684	5.9211e-05	0.000501692																		WBGene00015929	C17H12.3	72.579	42.907	58.8918	60.5976	72.2368	27.1468	147.801	31.9071	64.2584	-0.914408	0.36601	0.000574086	0.00521807
WBGene00022375	Y94H6A.2	38.4799	40.7206	47.9334	26.4294	14.664	15.0593	16.5996	15.8591	26.9681	1.14659	0.34886	5.92771e-05	0.000501934																		WBGene00019313	btb-10	115.17	175.971	120.689	102.793	86.2531	214.101	104.412	137.104	132.061	0.563397	0.207321	0.000596939	0.00540159
WBGene00021107	W09B7.2	24.1336	25.178	22.7462	43.3152	60.6005	56.9601	54.2538	66.9909	44.2723	-0.938173	0.283185	5.93501e-05	0.000501934																		WBGene00010611	K07A1.4	62.233	35.1963	22.0201	34.8771	52.3896	25.1841	68.9108	24.4416	40.6566	-0.834949	0.330232	0.000598018	0.00540537
WBGene00017186	F07B7.2	24.1336	25.178	22.7462	43.3152	60.6005	56.9601	54.2538	66.9909	44.2723	-0.938173	0.283185	5.93501e-05	0.000501934																		WBGene00000741	col-168	242.806	170.47	207.829	229.447	228.706	95.9125	394.623	164.742	216.817	-0.643182	0.243913	0.000598168	0.00540537
WBGene00001858	hil-7	46.3291	84.6287	14.8182	48.5855	7.42532	9.09114	22.5802	3.97494	29.6791	1.89201	0.599276	6.00242e-05	0.000507163																		WBGene00020740	T23F4.2	96.1156	59.5885	72.7581	91.4487	114.731	60.9468	86.3873	55.3294	79.6632	-0.549633	0.201274	0.000606791	0.0054692
WBGene00011888	cutl-15	82.521	83.4148	89.3699	87.6501	55.8706	49.4957	45.3638	51.0933	68.0974	0.677265	0.196945	6.00822e-05	0.000507417																		WBGene00015084	B0244.9	36.2293	13.2052	13.5562	25.7061	20.0836	7.7414	40.4377	12.742	21.2127	-1.09429	0.447839	0.000606881	0.0054692
WBGene00007560	C14A4.9	8.73969	14.516	0.814867	9.70494	0	0	0	0	4.22194	5.76847	2.64288	6.06992e-05	0.00051239																		WBGene00020715	nspd-4	234.975	153.827	104.724	152.839	253.75	53.9545	329.429	88.2337	171.466	-1.02667	0.422727	0.000611096	0.00550119
WBGene00008494	F01D5.3	163.82	145.888	145.399	148.42	107.821	90.1239	98.6487	107.637	125.97	0.5177	0.145866	6.15992e-05	0.000518781																		WBGene00011491	T05F1.5	98.642	70.3786	62.0358	82.5964	76.9407	31.0125	136.239	36.147	74.249	-0.798267	0.315926	0.000614027	0.00552157
WBGene00012629	slc-36.3	2.20029	7.75901	4.8747	2.40158	23.8161	20.4429	21.0228	14.0951	12.0766	-1.86445	0.574579	6.22906e-05	0.000524361																		WBGene00022258	Y73C8B.1	80.9466	43.991	68.2509	97.2845	103.169	64.9151	88.2948	49.9569	74.6012	-0.588093	0.218767	0.000616495	0.00553339
WBGene00008228	C50B8.6	270.768	269.111	397.236	434.565	216.817	197.694	219.266	245.962	281.427	0.573421	0.164275	6.33077e-05	0.000532676																		WBGene00009938	F52F12.5	62.093	39.6189	42.7311	46.8198	64.1334	15.4809	92.4931	20.1716	47.9427	-0.942378	0.382632	0.00061853	0.00554102
WBGene00019565	cyp-35A3	95.7557	91.1903	93.4333	45.6156	148.338	121.603	162.633	150.627	113.649	-0.733178	0.216406	6.33945e-05	0.000533159																		WBGene00022876	ZK1248.5	35.2885	16.4963	23.1071	30.2864	36.1811	11.6273	57.3146	18.0704	28.5465	-0.960646	0.389702	0.000625317	0.00558436
WBGene00012744	Y40H7A.4	15.4172	23.7734	18.6403	34.2364	44.1495	54.7159	46.929	54.4943	36.5445	-1.03368	0.318978	6.34625e-05	0.000533484																		WBGene00017175	irld-3	29.0163	24.2019	11.5075	28.4549	37.023	6.77739	49.5142	12.7476	24.9054	-1.11023	0.459028	0.000626973	0.00559245
WBGene00018568	F47E1.4	120.149	129.128	156.001	107.925	184.736	187.357	239.992	181.402	163.336	-0.554352	0.158121	6.40269e-05	0.000537234																		WBGene00021517	Y41D4B.15	13.4841	4.39489	0	13.754	7.68886	0.968199	16.0219	3.18639	7.4373	-2.05178	0.845474	0.000636886	0.00564742
WBGene00015455	C04G6.5	39.5882	67.5823	64.9538	54.7866	12.0596	28.9172	17.7258	32.5085	39.7652	1.14261	0.351927	6.54007e-05	0.000547173																		WBGene00018930	F56B3.6	102.614	62.7018	55.4778	62.4154	89.4474	18.3975	130.041	40.3705	70.1831	-0.902387	0.367414	0.000646669	0.00572803
WBGene00018354	F42G2.5	63.807	103.776	108.056	96.0645	58.6253	48.4169	53.1106	39.6425	71.4373	0.794725	0.237255	6.54222e-05	0.000547173																		WBGene00016506	abhd-5.1	114.241	90.169	78.9008	135.823	186.148	110.494	135.012	85.0591	116.981	-0.54694	0.202648	0.000667833	0.00588091
WBGene00044998	M199.9	0	0.960907	1.64202	3.62826	11.0917	11.7622	8.79571	27.0546	8.11692	-2.82609	0.863172	6.63072e-05	0.000553301																		WBGene00044492	Y54G2A.49	33.2557	11.0694	9.39564	36.0195	20.2471	10.3233	25.4357	14.938	20.0855	-1.06154	0.438397	0.000669423	0.00589178
WBGene00021095	mlt-8	124.091	199.601	66.6165	97.387	40.3648	51.6082	69.7374	50.2323	87.4547	1.04831	0.322849	6.64924e-05	0.000554592																		WBGene00011114	R07E5.6	56.09	42.8841	18.9432	42.2147	53.0658	20.3556	69.7643	23.3926	40.8388	-0.86096	0.349036	0.000674464	0.0059327
WBGene00021468	epg-2	2135.98	2379.48	1197.63	1735.34	3352.1	3102.01	4008.09	3153.47	2633.01	-0.766082	0.229165	6.73175e-05	0.000560701																		WBGene00008309	nhr-170	66.4536	56.0829	35.7494	75.2545	98.4841	48.4571	83.5753	51.0311	64.386	-0.632377	0.241822	0.000674831	0.0059327
WBGene00022346	pals-17	147.965	193.588	137.286	202.252	118.532	112.807	85.274	103.15	137.607	0.61674	0.179301	6.75175e-05	0.000562109																		WBGene00020362	fbxb-10	21.7939	49.4897	33.6026	25.6977	10.7786	47.4758	20.6388	39.3282	31.1007	0.903229	0.368434	0.00067809	0.0059554
WBGene00013955	kri-1	130.444	137.173	109.252	137.376	83.7873	79.7336	73.9098	89.5183	105.149	0.577226	0.166397	6.83132e-05	0.000567693																		WBGene00008485	ugt-43	104.331	57.5289	52.6772	98.8667	78.2241	64.361	83.6012	55.3726	74.3703	-0.554354	0.20659	0.000678656	0.00595721
WBGene00012257	lpr-4	28.5982	36.8514	4.87466	34.8276	3.66461	7.53101	4.42607	0.880976	15.2068	2.30287	0.737746	7.08115e-05	0.000586576																		WBGene00019703	fbxb-41	56.0209	109.984	88.1251	67.9175	30.8098	148.214	73.4614	86.0839	82.5771	0.760726	0.30289	0.000679694	0.00596316
WBGene00021261	Y22D7AR.7	24.2478	20.3874	8.93754	10.7932	54.8767	57.0663	37.6034	30.8213	30.5917	-1.28891	0.405508	7.20858e-05	0.000596317																		WBGene00013101	Y51H4A.5	3.1133	17.5964	22.0498	10.0956	8.46923	28.0974	10.3205	24.4469	15.5236	1.21478	0.50718	0.000681784	0.00597655
WBGene00011175	R09E10.5	158.924	262.31	47.1274	110.229	16.445	33.3958	45.3309	23.77	87.1916	1.95658	0.633134	7.39478e-05	0.000611163																		WBGene00271817	F55C12.19	60.0297	39.6171	37.5315	56.0042	95.0242	39.6715	68.1871	40.3467	54.5515	-0.686671	0.267143	0.00068528	0.00599313
WBGene00008392	D1086.5	95.2637	99.6465	120.222	77.0999	136.099	139.613	193.849	176.359	129.769	-0.630047	0.185083	7.49303e-05	0.000618158																		WBGene00003435	msp-40	776.646	558.098	459.606	626.715	710.435	283.281	1189.48	334.199	617.308	-0.819103	0.332071	0.000691131	0.0060411
WBGene00001064	dpy-2	118.761	152.233	38.1845	72.0705	21.0762	50.56	36.5174	20.2636	63.7082	1.35723	0.431597	7.53177e-05	0.000621072																		WBGene00008633	fbxa-18	11.3762	5.5024	4.16176	22.9522	11.6001	3.86944	18.5361	3.18402	10.1478	-1.53892	0.649	0.000701891	0.00611442
WBGene00016647	fbxc-4	205.42	215.14	242.909	251.226	121.979	152.694	127.289	192.985	188.705	0.553853	0.160079	7.60063e-05	0.000625614																		WBGene00019687	K12H6.7	58.1241	76.9822	88.2344	56.9016	56.1939	105.616	52.7245	81.8493	72.0782	0.549896	0.205255	0.000703321	0.00611859
WBGene00016648	fbxc-2	205.42	215.14	242.909	251.226	121.979	152.694	127.289	192.985	188.705	0.553853	0.160079	7.60063e-05	0.000625614																		WBGene00008830	nhr-176	97.5932	91.274	66.2236	113.801	140.82	74.62	129.411	81.8588	99.4501	-0.523117	0.193525	0.000705169	0.00613146
WBGene00019073	fbxc-3	205.42	215.14	242.909	251.226	121.979	152.694	127.289	192.985	188.705	0.553853	0.160079	7.60063e-05	0.000625614																		WBGene00013230	fbxb-22	61.1988	93.4894	84.9452	64.247	63.9423	150.14	58.5657	88.204	83.0915	0.620678	0.238161	0.000711956	0.00617426
WBGene00019687	K12H6.7	61.5072	60.0797	59.3053	55.2994	91.7247	93.5464	128.4	89.0049	79.8584	-0.674977	0.200925	7.76513e-05	0.00063771																		WBGene00007457	C08F11.10	47.7174	30.7961	35.6619	37.6302	63.1668	24.2169	86.1095	14.8782	42.5221	-0.918998	0.38146	0.000731182	0.00631455
WBGene00022410	Y97E10C.1	174.474	140.165	137.129	156.347	117.39	80.6346	90.1037	97.8365	124.26	0.576519	0.16791	7.79899e-05	0.000639623																		WBGene00007060	wht-6	108.08	50.5764	66.3871	66.0724	86.8501	59.143	131.326	43.6044	76.505	-0.676976	0.266714	0.000734657	0.00634125
WBGene00284855	C04C11.25	28.335	34.0589	74.8933	79.6862	15.4534	5.55281	29.4298	9.48516	34.6118	1.5979	0.513268	7.83928e-05	0.000642637																		WBGene00000731	col-158	32.1849	52.785	74.6325	31.2034	50.0182	87.218	45.8094	73.3539	55.9007	0.696352	0.276154	0.000763887	0.00657641
WBGene00013883	npr-13	9.68202	2.16848	7.34116	19.1472	45.8741	26.5078	42.3076	27.7999	22.6035	-1.7379	0.584236	8.02604e-05	0.000656466																		WBGene00008138	C47D12.4	39.4218	64.8909	59.798	52.3148	28.4993	89.1216	26.4008	62.7029	52.8938	0.742804	0.298529	0.000765563	0.00658742
WBGene00019858	R03H10.6	29.7387	44.6422	36.5618	43.1932	15.557	18.2994	15.4862	15.8531	27.4165	1.07645	0.335856	8.04431e-05	0.00065753																		WBGene00018563	F47D12.7	91.4569	42.8796	40.048	48.6365	69.1685	42.6616	110.755	44.6688	61.2844	-0.730493	0.294673	0.000775244	0.0066638
WBGene00020283	T06A4.3	77.2866	46.047	53.9596	66.7729	140.862	104.304	101.317	91.3981	85.2434	-0.748983	0.227111	8.14729e-05	0.000664588																		WBGene00015634	C09D4.3	60.2498	34.0868	31.5786	45.8853	44.6015	27.1419	90.3285	27.6468	45.1899	-0.796775	0.326813	0.000778719	0.00668673
WBGene00010142	F56A8.8	154.269	116.044	124.283	157.894	220.847	188.957	213.835	185.204	170.167	-0.502821	0.144746	8.30122e-05	0.000675627																		WBGene00015574	irg-1	17.5993	4.40143	7.30374	24.7867	23.1689	6.77435	18.4764	10.6186	14.1412	-1.21285	0.516307	0.000781858	0.00671021
WBGene00001065	dpy-3	38.3981	77.4747	8.93603	43.3123	6.42682	10.7476	14.3936	5.28865	25.6222	1.8788	0.613431	8.46936e-05	0.000687464																		WBGene00016161	C27D6.3	83.7205	67.1443	33.2471	57.851	78.1724	22.2456	128.743	38.1991	63.6654	-0.889956	0.373654	0.000784171	0.00672657
WBGene00019730	asns-2	796.556	774.778	1029.03	1094.8	1267.68	1370.11	2084.23	1971.04	1298.53	-0.751749	0.228923	8.49609e-05	0.000689018																		WBGene00010719	K09E4.1	98.6245	91.2752	63.0588	92.6929	98.5058	40.7004	184.42	42.5228	88.975	-0.799924	0.329777	0.000786325	0.00673693
WBGene00021583	clec-72	122.134	94.0855	91.8073	123.668	56.7853	76.3963	66.3856	52.8549	85.5147	0.682956	0.205622	8.59116e-05	0.000696107																		WBGene00003432	msp-36	743.374	522.916	393.23	551.449	665.622	237.836	1001.15	323.585	554.895	-0.805134	0.332602	0.000786599	0.00673693
WBGene00012017	T25C8.1	16.4934	13.5744	17.0611	10.8111	32.0743	34.4229	39.8378	36.1225	25.0497	-1.10709	0.347887	8.62705e-05	0.000698392																		WBGene00194703	F26B1.8	420.098	298.258	217.731	304.797	378.674	153.831	643.135	160.302	322.103	-0.857174	0.358563	0.000794086	0.00679053
WBGene00015152	B0348.2	25.6902	19.2321	23.4011	49.6652	8.63062	10.9203	2.82527	9.69178	18.7571	1.59017	0.513352	8.69713e-05	0.000703378																		WBGene00012169	ttbk-4	60.2157	61.5827	46.2487	79.8441	82.3398	32.9487	90.4791	35.082	61.0926	-0.680494	0.271736	0.000802785	0.00685783
WBGene00010105	fbxb-62	16.4359	15.4847	9.748	14.4494	42.2773	27.9301	66.4518	26.4501	27.4034	-1.32499	0.425646	8.72964e-05	0.000705439																		WBGene00016800	C50C3.2	98.8293	71.4526	55.9971	56.8907	112.069	39.7723	135.482	42.5588	76.6315	-0.759426	0.311533	0.000816165	0.0069542
WBGene00013009	fbxc-23	49.3629	76.5012	66.6138	74.5999	25.7099	37.6148	35.4313	37.903	50.4671	0.84633	0.26126	8.81343e-05	0.000711261																		WBGene00044759	T06E6.15	30.0583	6.60025	5.23326	16.5219	13.8802	7.7463	26.4701	8.49904	14.3762	-1.26625	0.550716	0.000824641	0.00701662
WBGene00001074	dpy-13	18.6552	16.4656	109.671	66.1599	15.6047	10.7487	8.85704	12.3396	32.3127	1.83423	0.598172	8.88571e-05	0.000716775																		WBGene00016307	fbxc-18	131.552	172.404	125.909	119.169	64.7204	259.007	88.4178	160.429	140.201	0.67977	0.272515	0.000824762	0.00701662
WBGene00011284	ttr-27	83.8561	91.6405	113.707	140.269	177.367	146.834	185.179	171.269	138.765	-0.594736	0.176282	8.94588e-05	0.000720989																		WBGene00012467	arrd-8	9.34108	3.29925	1.05032	12.8488	20.0151	3.87575	9.17034	2.12593	7.71581	-1.81878	0.782029	0.000832788	0.00706236
WBGene00077712	nipi-4	84.0834	83.5335	84.4725	60.6168	148.405	113.33	128.325	114.949	102.214	-0.608439	0.180975	9.2176e-05	0.0007419																		WBGene00021468	epg-2	2014.51	3166.38	2814.2	2249.17	1132.56	4887.15	1651.27	2842.01	2594.66	0.765933	0.319344	0.000833124	0.00706236
WBGene00011450	ttr-22	30.3902	30.8343	38.1864	61.7795	16.6631	6.42509	18.8471	14.1439	27.1587	1.29789	0.417454	9.32382e-05	0.000749454																		WBGene00206380	C42D4.18	46.6713	57.1948	64.9994	42.2199	47.7714	101.701	41.3555	85.0116	60.8656	0.650024	0.258557	0.000854802	0.00721658
WBGene00012449	nhr-231	59.3849	54.3019	74.7443	61.2567	33.903	36.5764	23.2379	34.3594	47.2206	0.839475	0.259724	9.35506e-05	0.000751632																		WBGene00044633	F54H12.7	48.5775	23.1158	39.4777	44.0779	48.7621	10.6392	62.6342	13.7941	36.3848	-0.971016	0.418808	0.000864849	0.00727545
WBGene00019704	fbxb-40	43.9126	29.0633	21.1221	22.8487	55.9743	56.9772	73.0635	59.0486	45.2513	-0.930219	0.293145	9.58201e-05	0.000768507																		WBGene00044757	Y55F3BR.11	96.8763	73.737	74.4538	106.646	149.8	81.1927	116.492	77.463	97.0826	-0.517706	0.196485	0.000873157	0.00732674
WBGene00005548	sri-36	8.78438	11.6317	8.94442	16.8603	0	0	2.21651	0	6.05467	3.87946	1.14741	9.63769e-05	0.000772631																		WBGene00003444	msp-51	1175.38	852.078	699.536	952.168	1100.06	408.963	1718.25	517.737	928.021	-0.79696	0.334098	0.000873041	0.00732674
WBGene00045397	Y54G2A.52	195.892	202.508	250.189	281.848	143.26	150.013	170.767	166.895	195.171	0.503511	0.146689	9.81149e-05	0.000784143																		WBGene00007170	B0393.5	49.9193	97.8409	87.6243	77.9974	60.6636	156.155	70.6512	98.9368	87.4736	0.628477	0.249569	0.000875206	0.00733839
WBGene00206380	C42D4.18	49.3379	44.5329	50.3656	43.3313	86.348	71.991	78.6227	83.7477	63.5346	-0.680347	0.206642	9.98602e-05	0.000794943																		WBGene00206519	F36H5.13	20.7711	49.483	35.7687	22.9431	16.9225	77.5395	13.7299	22.328	32.4357	1.0366	0.451135	0.000888388	0.0074282
WBGene00022337	pals-16	109.724	110.41	84.4866	105.864	74.359	54.8157	58.6795	56.4107	81.8437	0.653773	0.198023	0.000100816	0.000802197																		WBGene00007489	C09G5.7	109.032	50.5841	67.3028	71.5832	83.0901	56.2118	97.2974	35.0847	71.2732	-0.636742	0.254953	0.000894559	0.00747225
WBGene00019839	R02F11.1	7.68318	13.5762	16.2843	8.45228	0	2.15296	0	0	6.01862	3.89483	1.15575	0.000100959	0.000802984																		WBGene00000695	col-121	43.5966	76.981	60.9362	58.7367	13.8547	195.736	36.6692	69.0958	69.4508	1.10067	0.488513	0.000901034	0.00751496
WBGene00269425	C49G7.13	19.7587	8.71852	25.9963	16.8371	1.83538	3.22499	5.53525	3.52536	10.6789	2.01234	0.65386	0.000101321	0.000805516																		WBGene00003448	msp-55	510.457	355.542	296.044	390.568	474.697	175.96	747.272	187.794	392.292	-0.844267	0.360941	0.000911276	0.0075737
WBGene00022096	Y69A2AR.25	76.8447	91.0636	104.798	132.285	54.1405	61.2766	61.9937	54.6424	79.6305	0.705332	0.216761	0.000104782	0.000830481																		WBGene00014129	ZK892.5	42.5114	28.599	17.8103	32.1247	37.7677	9.68458	51.7337	17.0005	29.654	-0.923838	0.398729	0.000912924	0.00757979
WBGene00021461	nekl-1	82.9971	89.0614	75.3347	104.823	54.3573	52.0973	40.9792	55.017	69.3334	0.691828	0.21242	0.000108079	0.000852524																		WBGene00013009	fbxc-23	46.6814	35.1954	39.8604	72.5068	63.1645	36.8102	71.1777	34.0077	49.9255	-0.647869	0.261364	0.000934717	0.00772202
WBGene00219796	C03D6.9	76.1584	50.1962	37.6591	51.1431	95.4245	118.945	101.854	81.9728	76.6691	-0.778948	0.243987	0.000108939	0.000858565																		WBGene00018708	oac-32	114.573	63.3262	68.3237	111.178	97.7783	48.1485	80.4803	74.9538	82.3452	-0.554162	0.216496	0.000942225	0.00776575
WBGene00045468	F08A8.8	43.8121	51.2824	47.1147	48.1778	29.4198	15.037	25.4755	16.7531	34.634	0.978792	0.312502	0.0001092	0.000859871																		WBGene00017756	F23F12.12	578.906	872.17	1066	562.612	791.003	1331.04	837.821	1047.9	885.932	0.531823	0.205625	0.000942648	0.00776575
WBGene00019019	frpr-10	40.6114	18.4049	26.8086	20.4463	11.0131	3.22488	9.96365	4.40678	16.8599	1.61064	0.53054	0.000110682	0.000870788																		WBGene00015271	C01B4.7	220.16	105.452	54.3481	108.596	102.008	74.6739	119.276	51.6462	104.52	-0.7474	0.316884	0.000946045	0.00778455
WBGene00008779	F14B4.1	228.152	238.826	155.188	145.108	117.984	93.6752	133.823	117.121	153.735	0.643628	0.196304	0.000110933	0.000872373																		WBGene00021219	Y19D10A.4	220.16	105.452	54.3481	108.596	102.008	74.6739	119.276	51.6462	104.52	-0.7474	0.316884	0.000946045	0.00778455
WBGene00008495	F01D5.5	237.495	242.157	211.16	170.467	172.701	132.917	143.029	128.009	179.742	0.5201	0.153858	0.000112691	0.000885059																		WBGene00077531	F40G9.15	13.4725	39.6028	35.5732	31.2085	8.48391	88.1083	16.1185	30.8074	32.9219	1.16344	0.523215	0.000949658	0.00780735
WBGene00020156	T02B11.4	99.4186	97.5982	103.16	144.77	63.5672	65.4555	64.2849	73.2226	88.9346	0.643812	0.196706	0.000113026	0.000886922																		WBGene00015048	faah-2	2341.37	1412.84	1539.51	2484.14	4700.72	2221.25	3839.4	1784.58	2540.48	-0.759509	0.317189	0.000949759	0.00780735
WBGene00008176	C48B4.13	5.46637	2.90001	4.87375	8.44134	21.1773	18.2465	19.9467	19.4052	12.5571	-1.60962	0.52934	0.000114395	0.000896895																		WBGene00022621	ZC477.7	95.284	63.8123	64.7716	76.19	81.8155	36.782	116.483	50.9797	73.2647	-0.626755	0.252992	0.000952025	0.0078221
WBGene00012069	T26H5.4	1.06628	5.75261	6.50597	17.5984	0	0	0	0	3.86541	5.54768	2.65231	0.000114521	0.000897491																		WBGene00016680	C45G9.9	232.439	157.271	102.876	157.859	216.374	59.0988	381.958	76.5266	173.05	-1.03087	0.460953	0.000955679	0.00784823
WBGene00045248	ZK180.7	19.6575	17.3902	15.4334	20.5141	3.68634	8.58306	2.21685	1.76457	11.1557	1.85592	0.61187	0.000114632	0.000897979																		WBGene00043995	F40F12.9	48.6358	15.2375	17.2741	29.7881	44.9867	21.361	35.2136	22.416	29.3641	-0.84109	0.357788	0.000964583	0.00791742
WBGene00017243	F08C6.5	64.6308	41.6092	42.2409	40.9476	19.3048	22.5566	26.5824	16.7527	34.3281	0.998458	0.321806	0.000115005	0.000899731																		WBGene00016605	C43E11.5	65.4123	39.5883	43.1047	54.1468	71.5588	26.1663	88.1663	46.7777	54.3651	-0.679668	0.280296	0.000981795	0.00803878
WBGene00019952	fbxb-74	52.8049	41.7038	25.9984	34.8238	90.6874	63.4795	87.4116	65.1902	57.7624	-0.858439	0.273421	0.000116201	0.000907916																		WBGene00021880	Y54G2A.15	24.8277	16.5066	13.5351	23.8694	34.0137	10.6418	50.9333	14.862	23.6487	-0.98913	0.436351	0.000985824	0.00805584
WBGene00009213	thn-1	8.74494	7.73277	21.9318	9.6482	49.7265	30.0513	26.5965	41.4578	24.4862	-1.3595	0.445468	0.000116378	0.000908906																		WBGene00009313	F32B4.2	22.7751	9.90331	10.4334	19.2787	27.8024	8.70982	34.6457	12.7423	18.2863	-1.03192	0.45542	0.000993889	0.00810974
WBGene00015607	fbxb-13	51.5744	32.9306	24.3712	34.8852	74.354	79.5391	87.464	52.8842	54.7503	-0.899233	0.288441	0.000116585	0.000910131																		WBGene00016071	C24H12.1	30.1113	43.9867	63.0849	41.2983	15.3884	102.728	33.2026	53.1571	47.8697	0.901681	0.394573	0.000996155	0.00812186
WBGene00010655	K08D8.1	22.466	35.7386	20.5953	29.2085	12.0639	4.29393	11.0369	5.26737	17.5838	1.46767	0.484295	0.000117159	0.000913047																		WBGene00019949	R08C7.5	38.2178	27.9674	18.838	28.29	44.3559	16.3863	65.1028	15.8604	31.8773	-0.905313	0.396827	0.00100743	0.00818287
WBGene00011520	nhr-213	57.1411	62.7782	53.6348	62.5854	30.1916	34.4299	29.9819	31.7276	45.3088	0.78324	0.246144	0.00011823	0.000920603																		WBGene00007763	C27B7.6	23.8893	24.1912	11.5752	30.2846	36.148	10.6622	75.4914	14.886	28.391	-1.11111	0.504856	0.001013	0.00821714
WBGene00017252	sdz-10	45.0422	41.6732	29.2467	28.8473	60.527	73.1232	78.5854	62.5649	52.4512	-0.801133	0.253572	0.000120498	0.000934661																		WBGene00019260	H34I24.1	18.6641	15.3994	12.5728	28.4532	28.5175	9.68471	41.3836	9.5629	20.5298	-1.02135	0.45395	0.00101573	0.00822718
WBGene00019039	fbxb-18	12.0623	20.332	8.93588	13.2386	28.4726	29.0132	44.2928	43.1948	24.9428	-1.2081	0.397154	0.000120625	0.000935245																		WBGene00017249	fbxb-108	22.8527	41.7841	34.7337	22.025	17.6875	77.547	27.4441	38.2796	35.2942	0.875337	0.382765	0.00103504	0.00835901
WBGene00020542	fbxb-82	31.8393	39.7217	24.3717	34.8723	58.7231	64.5046	77.49	53.7598	48.1603	-0.834036	0.266104	0.000123183	0.000952635																		WBGene00012855	Y44A6D.5	53.9957	37.3883	24.1859	47.7222	43.0846	19.3832	78.9863	30.8318	41.9473	-0.78944	0.339933	0.001038	0.00837885
WBGene00018646	mul-1	48.6173	54.1488	35.0474	25.2782	15.928	12.338	15.9465	19.045	28.2936	1.15387	0.378905	0.000123344	0.000953477																		WBGene00018437	btb-8	134.945	189.153	139.741	145.006	65.423	276.166	98.5424	178.588	153.445	0.664571	0.275439	0.00104006	0.00839139
WBGene00010453	fozi-1	148.092	155.602	84.376	108.478	94.9464	49.1265	52.3078	41.6495	91.8223	0.909666	0.293191	0.000124973	0.000964835																		WBGene00013710	Y106G6G.1	56.0615	49.4864	40.9904	65.1602	62.334	17.4432	95.0676	29.7662	52.0387	-0.805029	0.348785	0.00104439	0.00842225
WBGene00008763	F13G3.3	18.1551	16.9438	17.9904	11.3953	42.4976	51.054	28.0008	35.8999	27.7421	-1.08824	0.355722	0.000127896	0.00098281																		WBGene00015987	C18G1.9	45.6725	37.3908	18.9111	33.0394	50.0308	17.4418	72.1931	11.6931	35.7966	-0.962495	0.430557	0.00104599	0.00843105
WBGene00000738	col-165	12.0998	10.6768	0	13.2508	0	0	0	0	4.50343	5.76984	2.74317	0.00012842	0.000986417																		WBGene00019151	pck-3	63.3964	57.1728	35.8326	60.5661	66.8627	25.2091	107.329	35.097	56.4332	-0.760849	0.326533	0.00105651	0.00850343
WBGene00022419	Y102A11A.9	114.129	91.507	113.597	105.971	84.2168	61.6565	52.7082	54.5222	84.7884	0.660522	0.204885	0.0001289	0.000989265																		WBGene00000546	clp-6	99.7705	75.864	81.1484	98.1906	105.291	61.0834	147.296	70.1937	92.3546	-0.528199	0.207738	0.00105759	0.00850799
WBGene00012323	oac-54	40.7084	38.7966	43.8724	51.6312	80.6034	68.8622	69.7061	84.5691	59.8437	-0.70256	0.220133	0.000130518	0.000999998																		WBGene00044207	Y6G8.5	16.1375	7.04967	0.959067	12.6447	7.76312	0.88666	29.7294	4.17295	9.91787	-1.79056	0.850328	0.00106472	0.00855886
WBGene00009415	F35E2.8	18.6224	15.4825	10.5602	10.8391	38.6095	42.9649	27.69	30.8602	24.4536	-1.1452	0.377822	0.000131058	0.00100371																		WBGene00044177	C30G7.3	102.735	79.1845	48.2951	61.4914	102.405	36.8167	146.795	49.956	78.4599	-0.751684	0.323391	0.00108003	0.00866328
WBGene00018442	sdz-18	26.3821	28.0163	35.5849	36.2739	52.7292	70.0967	86.7438	49.3534	48.1475	-0.884598	0.2859	0.000131968	0.00101026																		WBGene00011133	R08A2.2	30.1071	10.997	13.6635	19.2727	21.5476	8.7216	32.071	6.37848	17.8449	-1.05913	0.478032	0.00108185	0.00866589
WBGene00000133	amt-1	62.761	55.3078	99.9344	70.805	125.405	91.4853	179.212	148.854	104.221	-0.787479	0.251022	0.000133168	0.00101892																		WBGene00014238	ZK1225.4	18.7	14.2942	15.7931	33.9548	37.6761	6.78579	38.8647	15.9507	22.7524	-1.01137	0.455144	0.00108193	0.00866589
WBGene00012886	Y45F10D.6	135.263	145.806	197.378	241.563	106.997	96.5148	130.801	90.9063	143.154	0.666909	0.208046	0.000133212	0.00101892																		WBGene00013079	ttr-26	444.249	256.186	325.857	498.392	714.576	455.289	668.245	289.713	456.563	-0.650731	0.270822	0.00108613	0.00868696
WBGene00020449	fbxa-54	189.014	196.768	145.423	168.241	123.775	121.528	48.6974	63.4422	132.111	0.835517	0.268566	0.000133496	0.00102066																		WBGene00044586	Y61A9LA.12	14.4828	28.612	29.1518	13.771	10.8229	30.9581	17.3646	31.844	22.1259	0.874407	0.385612	0.00110989	0.00884278
WBGene00012591	nspe-1	569.107	447.583	439.176	569.19	276.329	328.07	143.819	157.083	366.295	0.995814	0.326803	0.000133787	0.00102246																		WBGene00017279	F09C12.8	35.2949	18.6952	21.0161	40.3813	26.1677	10.6593	68.741	21.2608	30.277	-0.964893	0.439236	0.00113704	0.00903741
WBGene00015182	B0416.7	160.517	136.705	95.0059	110.642	79.3722	82.6225	57.6766	72.4287	99.3713	0.675153	0.212086	0.000137164	0.00104562																		WBGene00235332	K04A8.20	8.40255	1.12277	6.32045	15.054	14.3078	2.96544	20.2715	3.25319	8.96222	-1.58732	0.737975	0.00116045	0.00921016
WBGene00006310	sul-3	57.1414	76.7967	76.7045	89.6091	124.281	128.998	112.612	110.581	97.0904	-0.588587	0.18098	0.000139855	0.00106524																		WBGene00008383	D1081.5	26.9757	12.0981	9.44431	17.4381	16.1732	4.84382	35.5727	6.37684	16.1153	-1.18584	0.55479	0.00116865	0.0092575
WBGene00012041	T26E3.8	46.1152	40.692	35.7452	37.2755	69.7298	65.5815	92.9865	63.4533	56.4474	-0.752736	0.239942	0.000140149	0.00106704																		WBGene00015627	C09B9.2	75.7625	67.0855	44.1076	69.7508	72.367	25.1917	107.769	30.8253	61.6074	-0.758929	0.332191	0.00117455	0.00929095
WBGene00021252	cht-4	32.9719	26.1729	26.8099	44.4596	12.8345	11.8308	12.174	13.2168	22.5588	1.1632	0.386775	0.000141787	0.0010777																		WBGene00004144	pqn-60	83.7048	64.9417	58.1522	65.2013	97.5445	53.1977	201.928	43.4973	83.5209	-0.800685	0.357063	0.00120852	0.00950518
WBGene00012581	Y38E10A.3	61.3462	49.3512	64.9861	26.495	87.3291	92.3756	118.512	92.5799	74.1219	-0.807229	0.25983	0.000144242	0.00109499																		WBGene00010933	M162.7	50.9355	41.7785	23.1981	39.4591	66.8455	19.3936	95.8525	34.0363	46.4374	-0.854115	0.385172	0.0012074	0.00950518
WBGene00010120	dot-1.4	95.5838	92.0719	87.7403	86.5379	135.72	140.873	156.062	115.435	113.753	-0.529056	0.160695	0.000145841	0.00110528																		WBGene00009643	F42G4.6	61.2506	57.1846	29.4269	59.6539	119.285	44.5764	132.877	54.2164	69.8089	-0.791523	0.351543	0.00121519	0.00953499
WBGene00022076	daao-1	26.3542	35.8496	12.1859	32.4635	46.7884	52.6823	71.9521	77.5524	44.4786	-1.05409	0.351831	0.000146042	0.00110634																		WBGene00004123	pqn-36	60.9884	45.6802	30.1595	59.9074	79.0207	45.5162	74.6319	41.4314	54.6669	-0.605879	0.251717	0.00123482	0.0096616
WBGene00017389	lgc-38	65.3759	47.0536	75.7618	69.5197	30.6003	29.8254	40.2147	33.9999	49.0439	0.812021	0.262928	0.000152074	0.0011482																		WBGene00010366	H05L14.1	107.079	69.263	89.6513	94.5173	88.3483	39.759	179.101	36.165	87.9855	-0.77863	0.348112	0.00126219	0.00985248
WBGene00000707	col-133	773.539	636.302	770.127	1018.96	458.095	565.35	326.614	487.425	629.551	0.696225	0.221266	0.0001522	0.00114868																		WBGene00019512	K08A2.2	31.1368	23.0948	15.7546	32.122	38.4908	13.5651	63.0472	22.3222	29.9417	-0.881507	0.402779	0.00127192	0.00991393
WBGene00012501	Y26D4A.3	5.43114	10.6021	5.68794	9.68854	0.925715	0	0	0	4.04193	3.94869	1.47441	0.00015415	0.00116197																		WBGene00012297	W06D4.3	26.9626	6.59958	12.5769	21.1103	23.8893	13.5594	28.728	7.43819	17.608	-1.00975	0.466309	0.00127459	0.00992097
WBGene00017201	grsp-4	67.5902	90.7246	80.4049	93.0444	144.901	122.226	108.647	143.889	106.428	-0.576797	0.178264	0.000154153	0.00116197																		WBGene00004335	ref-2	46.794	88.921	55.7481	50.729	31.5123	138.913	26.287	49.8667	61.0964	0.85723	0.391416	0.00130301	0.0101281
WBGene00013310	Y57G11C.14	61.3411	70.6368	73.1091	57.8105	99.2861	95.5949	106.331	120.797	85.6133	-0.595515	0.184874	0.00015582	0.00117356																		WBGene00008602	oac-14	577.934	155.022	160.257	690.078	1950.93	569.19	1554.4	335.038	749.107	-1.46753	0.752967	0.00130878	0.0101682
WBGene00269355	T28A11.25	17.4754	10.628	29.2423	13.2727	40.5456	47.2091	43.2273	43.2308	30.6039	-1.08427	0.363282	0.00016278	0.00122192																		WBGene00012728	Y39G8B.9	49.3875	29.6986	28.8777	40.4826	55.9733	33.8384	80.5579	27.5902	43.3008	-0.714266	0.313444	0.00131556	0.0102117
WBGene00016071	C24H12.1	31.8798	43.6266	16.2485	34.8414	63.2443	70.9907	101.813	51.1026	51.7184	-1.01023	0.340477	0.000164725	0.001235																		WBGene00022487	fbxa-21	18.6646	18.6991	11.5259	24.7818	53.1795	16.4642	51.7254	10.6256	25.7083	-1.0495	0.498553	0.00133112	0.0103031
WBGene00009983	cut-2	12.0691	19.3696	25.1835	20.4517	1.83609	3.2244	3.32152	8.81425	11.7838	1.80445	0.619052	0.00017204	0.00128138																		WBGene00009962	F53B6.7	78.8651	62.6881	57.7397	79.8472	82.3892	38.7538	114.694	57.3955	71.5466	-0.575889	0.241013	0.0013525	0.0104319
WBGene00015830	fbxb-98	13.1797	17.4422	7.3116	18.0328	31.1873	40.8588	43.1693	28.1998	24.9227	-1.16096	0.398383	0.000176828	0.00130952																		WBGene00021862	fbxa-48	12.4624	6.59776	8.4156	30.2849	20.7692	6.78462	18.3079	6.37937	13.7502	-1.17604	0.560093	0.00135322	0.0104319
WBGene00013636	Y105C5A.12	5.36532	8.713	4.12221	4.88092	0	0	0	0	2.88518	5.05392	2.54552	0.000178981	0.00132277																		WBGene00021461	nekl-1	78.5967	52.3039	35.2441	84.5274	71.5322	46.8436	100.152	66.0065	66.9008	-0.592099	0.249586	0.00135542	0.0104402
WBGene00012168	W01A8.6	80.255	84.348	108.866	81.6929	145.728	145.212	144.971	116.301	113.422	-0.551857	0.171652	0.000180103	0.00132998																		WBGene00010246	F58D5.7	67.4012	48.3976	34.5795	47.7278	64.7386	27.1178	96.5481	38.2523	53.0954	-0.704111	0.311188	0.00136262	0.0104881
WBGene00007341	C05D12.4	95.5237	69.7574	83.6763	92.5881	109.183	145.139	141.694	133.076	108.83	-0.558668	0.17482	0.0001827	0.00134697																		WBGene00016765	C49C8.1	32.2028	6.59744	9.47381	9.17705	20.7625	9.69357	35.4444	4.25337	15.9506	-1.27105	0.622252	0.00136834	0.0105175
WBGene00004230	ptr-16	67.148	50.8377	71.1902	58.9321	128.967	125.417	90.9879	83.738	84.6523	-0.682317	0.220235	0.000184382	0.00135772																		WBGene00015907	C17F3.1	141.673	117.356	107.058	122.55	132.576	79.3769	246.779	63.6284	126.375	-0.639159	0.276358	0.00137092	0.0105324
WBGene00000512	ckb-2	1883.59	1859.32	2374.07	2453.81	1106.78	1399.58	1714.28	1220.32	1751.47	0.577411	0.181648	0.000185108	0.00136086																		WBGene00009416	F35E2.9	50.925	39.5812	37.9405	45.8834	66.0941	28.1179	74.2166	19.1438	45.2378	-0.726707	0.323603	0.00138363	0.0106104
WBGene00008484	E04D5.5	151.27	144.231	95.0439	116.771	67.9882	97.7705	69.7673	59.0668	100.239	0.682486	0.220864	0.000186617	0.0013714																		WBGene00007792	C28D4.4	17.6448	8.79797	6.30241	10.0954	16.1654	0.968952	36.6782	4.25191	12.6131	-1.48938	0.74653	0.00138724	0.0106331
WBGene00019183	npr-30	12.9684	22.0808	15.3892	8.6912	41.6119	35.9164	41.5942	28.9235	25.897	-1.1024	0.375973	0.000187543	0.00137764																		WBGene00021214	hasp-2	43.6605	38.4799	22.1455	44.0472	48.4034	11.6364	60.4725	21.273	36.2648	-0.83334	0.384052	0.0013886	0.0106333
WBGene00001623	glt-5	128.843	107.712	125.122	123.597	78.7129	61.3522	92.9216	78.3881	99.5811	0.563829	0.176797	0.000187969	0.00138021																		WBGene00235267	Y77E11A.23	53.9637	89.082	90.2983	70.669	41.5764	89.1365	45.8692	74.4035	69.3748	0.561954	0.233971	0.00138919	0.0106333
WBGene00016309	sdz-4	107.674	84.3204	70.6798	73.3147	121.043	130.122	160.487	124.246	108.986	-0.591633	0.187439	0.000188136	0.00138088																		WBGene00007610	C15H7.3	44.6484	35.1893	21.029	44.9692	33.854	18.4137	85.8656	19.1366	37.8882	-0.884842	0.415061	0.0013983	0.0106981
WBGene00019020	F57H12.5	45.122	80.6548	61.2406	60.2469	33.609	34.153	19.6619	33.7176	46.0507	0.874741	0.292015	0.0001905	0.0013971																		WBGene00009641	F42G4.2	83.0855	62.6783	61.019	79.8418	90.7649	49.4318	88.0968	51.0358	70.7442	-0.502373	0.202868	0.0014071	0.0107505
WBGene00011020	R05A10.3	125.257	109.521	132.423	140.617	74.2747	96.786	86.3304	73.1372	104.793	0.550678	0.172456	0.000191162	0.00140083																		WBGene00012255	lpr-6	39.4076	62.648	63.5398	40.2994	13.2095	132.224	37.1299	45.4092	54.2334	0.947607	0.451952	0.00140645	0.0107505
WBGene00017713	F22E5.20	52.4938	31.9046	26.8057	47.0211	89.2917	55.8186	83.1053	79.3801	58.2276	-0.83687	0.28038	0.000193735	0.00141796																		WBGene00015781	C14F11.6	50.7414	63.9972	68.2596	36.5343	21.6528	141.268	47.0574	56.5465	60.7571	0.846063	0.393883	0.0014158	0.0107921
WBGene00012104	sygl-1	155.575	137.418	133.222	139.689	109.38	76.2672	88.6049	99.6312	117.473	0.522815	0.162306	0.000193916	0.00141858																		WBGene00016825	C50E10.1	40.3472	34.1127	19.7855	42.2317	43.2873	15.4793	67.1266	25.478	35.981	-0.793532	0.364514	0.00144058	0.0109558
WBGene00021565	Y45G12C.1	56.0623	85.3124	95.0539	64.8789	122.826	102.182	158.255	133.044	102.202	-0.664195	0.214611	0.000196821	0.00143708																		WBGene00011677	cyp-13A1	23.8966	17.5926	10.5312	32.1192	23.8333	5.81665	33.1406	12.761	19.9614	-0.9755	0.467072	0.00147659	0.0111732
WBGene00013104	Y51H4A.8	150.645	119.775	140.518	148.479	104.173	91.179	97.5416	78.5345	116.356	0.522915	0.16285	0.000198135	0.00144578																		WBGene00015258	B0554.5	90.3777	48.381	45.2665	72.4985	64.5926	56.2234	88.0331	45.7241	63.8871	-0.548884	0.229527	0.00147771	0.0111766
WBGene00018456	fbxc-39	44.5684	45.3277	18.8511	24.5973	69.493	70.2663	63.2796	66.6237	50.3759	-0.901094	0.307886	0.000201741	0.00147005																		WBGene00010010	gmeb-2	25.9827	64.8689	38.9964	19.271	17.6759	38.7837	33.11	46.7964	35.6856	0.773357	0.355435	0.00148488	0.0112206
WBGene00019154	glf-1	35.23	46.5719	4.87483	52.8082	4.5773	6.45748	13.2753	3.52325	20.9148	1.93962	0.70501	0.000209271	0.00151912																		WBGene00018158	comp-1	84.1268	45.0841	31.5641	38.5442	60.7639	12.6004	92.6646	34.0243	49.9216	-0.888704	0.424559	0.00149372	0.0112822
WBGene00001345	fos-1	358.146	299.569	408.243	419.862	198.891	201.799	274.917	314.453	309.485	0.517926	0.161935	0.000209642	0.0015203																		WBGene00007274	C03C11.1	40.3958	24.2043	19.854	39.4716	27.7832	18.3918	51.8844	14.8696	29.6069	-0.79879	0.370053	0.00150855	0.0113683
WBGene00271824	R03H10.11	38.1299	31.8374	17.8674	19.3438	59.1062	60.0272	55.4376	48.555	41.2881	-0.903078	0.307889	0.000212533	0.00153942																		WBGene00022157	Y71G12B.22	37.3321	25.2985	14.6722	30.2887	43.156	21.3075	64.3545	22.3144	32.3405	-0.81645	0.380939	0.00151791	0.0114285
WBGene00044455	F23F12.13	46.2311	51.4183	30.8737	32.4091	71.4164	64.5702	70.8047	90.7269	57.3063	-0.765932	0.255278	0.000213595	0.00154589																		WBGene00021386	Y37F4.5	25.9636	6.59775	12.6238	20.1899	16.9228	11.6309	37.7586	5.31617	17.1254	-1.099	0.539996	0.00152375	0.011462
WBGene00020401	T10B11.5	72.3142	65.8081	65.7989	75.8623	99.2641	108.496	122.937	102.275	89.0944	-0.555573	0.176219	0.000213707	0.00154608																		WBGene00021993	Y59E9AL.3	719.438	590.54	439.307	639.673	665.685	295.562	1099.65	354.002	600.483	-0.698398	0.31706	0.00155203	0.0116325
WBGene00009297	sdz-16	115.389	73.6676	83.679	87.7243	149.444	132.284	209.176	119.835	121.4	-0.659467	0.215699	0.00021603	0.00156164																		WBGene00007495	C09G9.5	54.9349	28.6008	43.9635	62.4154	61.6879	38.7317	74.8021	39.3081	50.5555	-0.595493	0.257007	0.0015604	0.0116794
WBGene00019768	M04F3.2	65.0585	75.1416	78.0064	82.4276	110.209	113.525	123.095	110.453	94.7394	-0.53196	0.167957	0.000222315	0.0016007																		WBGene00017741	F23C8.13	47.2648	28.8429	23.7157	43.6677	43.2225	19.3781	36.2465	19.1185	32.6821	-0.704006	0.320043	0.00158353	0.0118373
WBGene00012824	Y43F8B.14	39.6501	35.9071	35.7493	28.7962	20.1332	15.0699	12.1678	12.3303	24.9755	1.03749	0.358799	0.00022444	0.00161472																		WBGene00020071	R13H9.5	33.204	35.1938	19.9428	47.725	45.4336	14.5321	69.9783	23.3827	36.174	-0.826	0.392058	0.00159719	0.0118956
WBGene00011167	chil-23	8.40324	3.70506	11.642	6.27266	24.4654	28.4421	15.8574	30.2974	16.1357	-1.41733	0.503518	0.00023382	0.00167689																		WBGene00003443	msp-50	675.662	476.623	421.364	501.639	605.679	249.43	914.892	268.42	514.214	-0.7208	0.332493	0.00160712	0.0119588
WBGene00016923	C54F6.5	22.46	33.7896	21.4464	26.7321	7.42913	10.7431	8.83698	10.5219	17.7449	1.23575	0.435771	0.000234287	0.00167958																		WBGene00018336	F42A9.7	50.8259	29.6967	27.2661	38.5482	34.6677	17.4355	63.1599	18.0658	34.9582	-0.777325	0.364252	0.001616	0.0119985
WBGene00012889	icap-1	90.7113	73.8176	105.066	89.684	126.41	131.694	153.96	132.163	112.938	-0.523874	0.166933	0.000248184	0.00176458																		WBGene00001103	dsl-1	69.4478	91.3021	78.5115	46.8115	41.638	98.767	35.6721	63.7436	65.7367	0.619527	0.272353	0.00161368	0.0119985
WBGene00012710	Y39C12A.9	48.1681	50.301	47.1143	63.86	93.8135	71.9484	104.132	82.0083	70.1682	-0.653364	0.216488	0.000251141	0.00178073																		WBGene00006625	try-7	11.42	4.39878	5.25528	13.7662	11.5432	4.84535	22.9074	1.06308	9.39992	-1.43035	0.721355	0.00161517	0.0119985
WBGene00045414	T19H5.7	58.9758	40.5714	35.2274	37.7344	80.551	78.2493	69.7807	73.9785	59.3836	-0.702227	0.235641	0.000255336	0.00180625																		WBGene00018345	F42C5.3	29.3656	6.21804	21.285	40.7172	38.5527	20.7952	31.2444	13.0382	25.152	-0.901383	0.43153	0.00161607	0.0119985
WBGene00009429	irg-5	45.0362	65.8971	48.7442	73.3271	99.9723	113.98	73.0535	123.371	80.4227	-0.708606	0.239326	0.000265423	0.00186959																		WBGene00022700	ZK353.4	22.8187	10.9989	10.4856	17.4385	20.8019	8.71756	33.3073	6.37605	16.3681	-1.02286	0.502752	0.0016236	0.012049
WBGene00019973	R09A1.3	217.338	246.052	333.889	228.508	141.328	113.948	185.986	200.066	208.389	0.59227	0.19378	0.000267381	0.00188193																		WBGene00008376	D1054.9	4.46039	11.3254	21.6431	11.3618	4.61811	27.9536	2.86972	18.4816	12.8392	1.28129	0.64677	0.00162995	0.0120906
WBGene00012256	lpr-5	51.7921	82.512	17.0625	44.3782	14.6361	16.1496	21.0146	3.52258	31.3835	1.51572	0.562524	0.000273153	0.00191957																		WBGene00019312	K02E7.7	12.4212	20.9083	14.5981	6.42655	10.0421	50.3185	2.31089	19.1128	17.0173	1.29318	0.661725	0.00163419	0.0121133
WBGene00000562	cng-1	31.6704	22.7452	31.7933	37.8534	47.2231	56.1533	72.9882	61.8641	45.2864	-0.802785	0.277322	0.000273601	0.00192198																		WBGene00006044	ssp-16	54.6075	56.1378	33.0761	55.1693	72.2025	18.367	89.7075	25.4652	50.5916	-0.792842	0.375454	0.00163519	0.0121133
WBGene00007482	C09F12.2	53.9871	60.18	64.9995	53.9797	84.1692	107.657	105.077	83.6641	76.7142	-0.602506	0.198532	0.000276474	0.00193991																		WBGene00010136	F55H12.5	67.4424	47.292	54.5738	85.3547	67.7693	36.8139	95.2295	54.2042	63.585	-0.566208	0.243796	0.00164168	0.0121523
WBGene00008858	pals-1	14.2625	12.5898	16.2474	22.8588	32.1333	41.9161	40.966	33.4946	26.8086	-0.988627	0.350883	0.000277512	0.00194569																		WBGene00014254	cyp-13A10	69.6207	32.9853	47.4057	100.027	63.8015	51.3837	61.6867	39.3485	58.2824	-0.619797	0.273197	0.00164193	0.0121523
WBGene00007619	C15H11.11	62.2982	51.1677	50.7085	63.2527	31.5179	28.9401	32.0999	30.8472	43.854	0.746601	0.255034	0.000280301	0.00196373																		WBGene00019586	K09F6.3	57.2035	51.6681	52.7958	56.8919	91.3708	26.1885	111.65	31.9161	59.9606	-0.744823	0.347957	0.00166064	0.0122579
WBGene00044726	Y53F4B.43	29.5891	30.9719	20.3084	20.4679	41.3531	54.7893	70.8794	44.9638	39.1654	-0.892766	0.314143	0.000282704	0.00197827																		WBGene00008519	cyp-13B1	33.2466	75.8684	61.0767	51.3908	38.442	120.209	49.1432	58.4874	60.983	0.685872	0.312441	0.00167528	0.012355
WBGene00044383	T05A7.11	5.50319	9.70394	5.69071	7.2102	0	0	0	0.881531	3.6237	3.74145	1.50096	0.00028932	0.00202068																		WBGene00017398	slc-17.6	922.084	505.743	513.501	669.846	942.045	563.872	1074.54	760.738	744.046	-0.505233	0.211684	0.0016812	0.0123744
WBGene00020476	T13B5.9	62.6531	75.6148	69.8685	75.696	113.667	122.615	102.923	97.8021	90.1049	-0.543562	0.17707	0.000293729	0.00204715																		WBGene00022847	ZK1055.6	595.164	482.779	266.296	864.31	1377.6	665.92	1145.31	389.908	723.411	-0.864745	0.424417	0.00168788	0.0124013
WBGene00304173	F07E5.13	31.8072	15.4928	17.8719	20.4568	46.8341	36.5381	47.6124	51.1264	33.4674	-0.927753	0.329448	0.000294865	0.0020523																		WBGene00022652	ZK84.5	46.0423	30.6118	24.7165	35.0579	41.4741	18.4114	55.0417	18.0123	33.671	-0.733251	0.340759	0.0016883	0.0124013
WBGene00008016	C38D9.8	60.378	68.7821	46.306	52.9139	91.7636	104.278	110.703	76.6756	76.475	-0.642223	0.216073	0.000296918	0.00206422																		WBGene00010686	K08F9.3	33.7221	17.8352	16.7854	46.2205	34.748	27.0497	37.7293	12.7027	28.3491	-0.787926	0.373134	0.0017415	0.0127412
WBGene00010187	F57B1.1	13.1841	14.5378	16.2482	16.8267	43.0998	43.015	25.4568	30.8414	25.4012	-1.02692	0.368021	0.000297467	0.00206725																		WBGene00019415	K05F6.4	97.6018	93.4719	114.603	57.8176	46.1655	146.339	58.3915	91.43	88.2275	0.619845	0.277287	0.00174657	0.0127671
WBGene00013154	Y53F4B.7	24.9291	27.9378	18.6934	30.3081	47.2565	39.6154	52.1269	68.0175	38.6106	-0.876981	0.309694	0.000298337	0.00207154																		WBGene00012404	Y6G8.2	88.0092	111.177	137.957	67.4523	107.994	191.826	71.8209	107.337	110.447	0.565057	0.245402	0.00175852	0.0128488
WBGene00000749	col-176	42.7844	47.4521	56.8656	40.9074	22.0357	23.6443	22.1442	27.325	35.3948	0.835953	0.292139	0.00030432	0.00210762																		WBGene00009149	F26D2.10	35.3592	18.6888	16.891	29.3637	28.4124	7.75922	50.1411	20.2128	25.8535	-0.883042	0.435037	0.0017643	0.0128755
WBGene00009423	F35E8.10	25.1776	35.7902	62.5482	53.0176	19.3153	13.9599	13.2936	23.8091	30.8639	1.09894	0.399539	0.00031715	0.00218564																		WBGene00016288	C31H1.5	73.6857	48.3897	28.3538	42.2176	64.6696	32.9427	68.7916	24.4475	47.9373	-0.692084	0.32045	0.00176992	0.0129036
WBGene00016308	C32B5.15	12.2414	6.69184	11.5275	3.65616	19.912	21.2158	38.2284	27.6902	17.6454	-1.34076	0.494996	0.000317533	0.00218745																		WBGene00013418	Y65A5A.1	43.5213	58.5224	62.7841	52.6938	20.7995	95.8425	33.4241	68.7475	54.5419	0.722556	0.338982	0.00177654	0.0129367
WBGene00015500	C06A5.2	37.2	45.4509	44.6767	49.4186	20.2439	20.3988	15.5112	28.2213	32.6402	0.887023	0.314341	0.000318463	0.00219303																		WBGene00001903	his-29	1410.65	2147.06	1980.96	1771.44	985.107	2945.03	1337.62	1922.64	1812.56	0.565848	0.246258	0.0017768	0.0129367
WBGene00002270	lec-7	34.386	34.5025	44.4051	53.3637	24.2609	20.2913	16.9661	15.1956	30.4214	0.940307	0.337587	0.000324878	0.00223297																		WBGene00001908	his-34	1410.65	2147.06	1980.96	1771.44	985.107	2945.03	1337.62	1922.64	1812.56	0.565848	0.246258	0.0017768	0.0129367
WBGene00185092	K08D8.7	104	73.8864	88.282	77.4296	64.8023	37.1201	50.6343	43.5718	67.4659	0.691908	0.237775	0.000327855	0.00225087																		WBGene00011919	T22C1.9	37.3375	34.0968	20.9683	36.7129	47.0001	17.4346	57.4358	15.9398	33.3657	-0.774733	0.371638	0.00181767	0.0131821
WBGene00021180	Y9C9A.13	35.2588	34.9442	36.5623	28.7881	54.8905	63.519	70.7879	55.4819	47.5291	-0.714767	0.247565	0.000336332	0.00230472																		WBGene00010466	K01D12.7	111.339	88.0134	74.2606	97.0147	95.837	66.0822	148.942	62.3153	92.9755	-0.510324	0.217643	0.00183634	0.0133054
WBGene00015229	fbxa-125	50.4159	60.9791	67.4243	65.0113	35.8364	41.8993	26.5792	28.212	47.0447	0.750478	0.262033	0.0003384	0.00231801																		WBGene00016088	clec-266	544.49	925.906	661.005	565.165	240.693	1472.55	423.478	793.592	703.359	0.84983	0.418628	0.00184681	0.0133525
WBGene00008105	C45B11.2	35.0614	36.7751	37.3673	24.0833	17.4631	12.8906	15.5056	11.4618	23.826	1.02294	0.37187	0.000341129	0.00233583																		WBGene00014121	ZK858.8	66.3618	51.6978	42.9584	55.9886	66.2831	34.8651	83.9141	30.8139	54.1103	-0.599836	0.268874	0.00185428	0.0134003
WBGene00016714	C46F2.1	107.645	90.123	126.735	174.304	169.681	192.474	211.414	207.969	160.043	-0.566706	0.18939	0.000341876	0.00234006																		WBGene00017405	bath-31	60.199	95.6781	85.0794	60.5727	73.1306	114.335	49.2885	82.9117	77.6494	0.506895	0.214871	0.00186343	0.0134486
WBGene00003762	nlp-24	1836.99	1488.36	2281.61	2482.59	3122.11	2861.61	2953.73	3169.16	2524.52	-0.510199	0.167087	0.000343111	0.00234586																		WBGene00008154	C47E12.11	29.2849	18.4753	20.5158	37.1856	28.1409	15.3223	46.417	13.6572	26.1249	-0.796112	0.385635	0.00186417	0.0134486
WBGene00020537	fbxb-37	119.751	108.547	40.6205	75.7219	155.897	139.797	220.258	153.327	126.74	-0.810166	0.28893	0.000343275	0.0023461																		WBGene00015696	C10H11.7	32.1683	17.5967	22.0455	22.9446	46.2001	4.8442	43.585	13.8174	25.4002	-0.983229	0.503861	0.00186688	0.0134586
WBGene00020413	T10E9.3	41.8609	51.4398	109.686	71.9809	128.1	110.88	151.538	131.225	99.5888	-0.771249	0.272555	0.000354997	0.00241621																		WBGene00235300	T06A10.107	25.7158	5.49801	15.4693	19.3291	21.7776	9.66923	28.0176	3.18266	16.0824	-1.08964	0.564886	0.00189812	0.0136571
WBGene00016883	C52E2.4	20.0903	26.5482	18.1159	24.3016	42.8369	35.9885	49.2984	51.7416	33.6152	-0.860402	0.309184	0.000355144	0.00241631																		WBGene00020860	nspd-10	129.139	96.4221	102.887	121.664	103.935	53.2889	172.015	45.5728	103.115	-0.636288	0.292902	0.00189884	0.0136571
WBGene00017911	fbxb-106	36.2114	19.3708	21.1217	37.2912	65.1749	37.6197	88.5712	59.0546	45.5519	-0.957456	0.351758	0.000357757	0.00243226																		WBGene00010991	R03D7.5	32.5463	20.5453	19.4728	33.4695	41.0553	14.0512	32.2874	16.8973	26.2906	-0.751314	0.359115	0.00190129	0.0136688
WBGene00012238	W04A8.3	37.3111	34.8687	30.8702	26.4636	68.8433	53.7437	65.3204	50.2394	45.9576	-0.741342	0.260769	0.000362907	0.00246451																		WBGene00015223	B0507.6	21.8269	6.59675	8.43304	26.6122	26.1275	13.5747	35.3868	17.0173	19.4469	-0.940927	0.474724	0.00190927	0.0137143
WBGene00044807	T19H5.6	8.77462	0.968687	3.25205	0	22.0728	29.0304	11.084	12.3532	10.942	-2.04871	0.788155	0.0003657	0.0024807																		WBGene00012138	T28F4.3	29.0879	15.3939	17.8974	32.1195	33.0641	20.357	41.1549	12.7604	25.2294	-0.775346	0.374364	0.00192827	0.0138388
WBGene00001437	fkh-5	41.7969	26.1838	34.9351	33.6269	66.8797	54.8685	70.8173	55.5017	48.0762	-0.73148	0.257308	0.000366705	0.00248566																		WBGene00005815	srw-68	6.739	5.19216	2.27235	7.79948	19.6234	5.24336	40.9758	4.01508	11.4826	-1.55792	0.860016	0.00193999	0.0139054
WBGene00013698	Y106G6D.1	143.961	172.537	121.05	155.02	207.205	222.623	276.689	177.109	184.524	-0.504714	0.166339	0.000369355	0.00249989																		WBGene00045392	F26D11.12	66.0161	34.1231	57.9712	77.1783	91.5138	51.2381	80.3245	51.9851	63.7938	-0.547696	0.241794	0.00201698	0.0143572
WBGene00019968	R08F11.4	41.7666	57.1942	56.0571	72.094	38.5018	24.7376	28.7745	20.2655	42.4239	0.84949	0.306533	0.000374357	0.00253092																		WBGene00021519	Y41D4B.17	54.0079	40.6856	28.4085	74.3352	51.5332	39.7401	66.3502	36.151	48.9015	-0.594573	0.270747	0.00205386	0.0145759
WBGene00017504	F16B4.2	134.152	123.112	124.134	116.761	72.5576	78.4274	88.6633	95.7439	104.194	0.500413	0.164524	0.000377395	0.00254956																		WBGene00044949	Y49A10A.2	114.67	175.275	181.987	169.913	123.994	309.732	136.989	177.812	173.797	0.506163	0.21892	0.00205653	0.0145886
WBGene00008633	fbxa-18	11.9799	24.1164	12.1829	19.3469	4.61878	6.43078	1.10885	3.53129	10.4145	1.71394	0.6515	0.000378606	0.00255679																		WBGene00017092	E02C12.6	19.7282	12.0963	15.7713	23.8612	52.3205	12.5988	25.188	5.31571	20.86	-1.03912	0.550262	0.002081	0.0147432
WBGene00017726	F22H10.2	559.18	595.394	744.196	792.856	273.438	307.63	390.639	516.166	522.437	0.724365	0.255863	0.000381431	0.00257395																		WBGene00019404	K05B2.4	15.5773	7.69745	5.25922	15.6014	15.3854	2.90764	19.4544	6.37927	11.0327	-1.15309	0.612283	0.00209182	0.0147946
WBGene00011894	ttr-23	62.8974	75.1815	117.562	127.565	45.8686	45.5192	54.9625	59.2644	73.6026	0.756801	0.269371	0.000386368	0.00259954																		WBGene00013424	Y66A7A.4	40.5078	26.3904	14.7321	43.1326	47.6848	10.6622	38.8897	30.8352	31.6043	-0.791929	0.396416	0.00211639	0.0149492
WBGene00009839	fbxa-188	53.8108	70.7333	61.7422	58.912	40.3639	32.2555	35.4219	29.9629	47.9003	0.706814	0.248218	0.000388368	0.00261158																		WBGene00006509	tag-164	52.8951	49.4953	38.7918	61.4941	60.0981	32.9322	85.0038	25.5037	50.7768	-0.63286	0.297398	0.00214036	0.0150928
WBGene00007866	C32H11.3	10.9902	4.84672	12.1863	3.60494	17.4189	34.4162	26.5616	23.7904	16.7269	-1.35781	0.515637	0.000389326	0.00261557																		WBGene00019530	scrm-8	18.5042	9.95374	13.7172	19.3814	22.8916	7.79331	39.7909	7.48113	17.4392	-0.998291	0.529092	0.00214439	0.0151148
WBGene00001441	fkh-9	169.04	134.435	97.2551	141.024	79.3025	70.6572	101.484	81.8386	109.38	0.602306	0.206508	0.00039034	0.00262141																		WBGene00017254	fbxb-111	15.5655	39.5925	37.7933	16.5201	17.7098	60.0684	19.498	18.069	28.1021	0.870293	0.449526	0.00218078	0.0153386
WBGene00043992	bbs-4	20.7866	20.9729	11.6473	17.9191	43.5107	33.4599	59.9577	29.8325	29.7609	-1.01778	0.382758	0.00039918	0.00267735																		WBGene00021398	Y38C1AA.7	246.261	200.307	126.051	135.874	214.07	88.0408	305.386	101.914	177.238	-0.619744	0.292671	0.002212	0.0155121
WBGene00010104	fbxb-60	18.6262	22.2585	10.5603	14.4501	32.1693	34.3747	40.9792	40.5574	26.7469	-0.97492	0.361831	0.000399259	0.00267735																		WBGene00009449	F35H8.4	27.8189	17.6119	5.16814	15.6313	27.173	7.73346	30.2908	7.42736	17.3569	-1.03208	0.558272	0.00221559	0.0155307
WBGene00012631	Y38H6C.19	72.1249	87.9472	65.7954	74.7867	44.2105	54.7306	36.5733	40.5787	59.5934	0.657437	0.230232	0.000417347	0.0027863																		WBGene00008001	C38C10.3	44.6074	15.3979	26.225	25.6986	30.0411	9.68697	44.7709	12.753	26.1476	-0.867383	0.45345	0.00224353	0.0156999
WBGene00020363	fbxa-3	38.4247	48.4397	51.1804	37.2787	21.1045	25.8013	14.3912	23.7956	32.552	0.872738	0.319462	0.000419664	0.00279561																		WBGene00015268	BE0003N10.3	49.6499	77.6691	68.2075	64.8276	53.5276	123.503	34.9308	80.4344	69.0938	0.604926	0.281611	0.00224851	0.0157282
WBGene00017434	F13H8.1	59.8538	65.3925	83.8615	94.6853	41.1018	38.045	30.3413	54.3888	58.4588	0.742577	0.266463	0.000426565	0.00283637																		WBGene00010331	F59D12.3	9.33663	7.69894	1.04906	18.3561	16.9458	2.90612	16.0706	5.31378	9.70963	-1.33554	0.742783	0.00225308	0.0157535
WBGene00017535	atf-8	19.7522	23.2453	22.7465	20.4497	9.17938	6.44916	7.74994	7.0512	14.5779	1.23208	0.467811	0.000426829	0.00283709																		WBGene00009546	fbxb-3	58.1468	59.3819	76.7557	44.9692	42.3175	118.235	43.5052	69.1046	64.052	0.606557	0.283685	0.00225742	0.0157706
WBGene00044459	Y55F3C.9	101.308	106.122	84.7813	96.0933	157.784	152.973	155.535	113.373	120.996	-0.504222	0.168812	0.000428112	0.00284387																		WBGene00016416	C34F11.5	93.5748	69.2616	48.5311	68.8227	67.5961	37.8216	109.478	41.4853	67.0714	-0.603058	0.283369	0.00226984	0.0158506
WBGene00021979	Y58A7A.5	220.656	219.91	524.801	527.934	111.033	94.6028	197.051	141.012	254.625	1.19248	0.462832	0.000438225	0.00289945																		WBGene00019234	ugt-8	131.959	59.3743	84.2624	100.028	163.745	95.9777	109.687	85.0755	103.764	-0.509677	0.225085	0.00227119	0.0158533
WBGene00004994	spp-9	2.15662	1.93319	2.45408	37.7961	0	0	0	0.884819	5.6531	4.20041	1.81576	0.000439401	0.00290577																		WBGene00020361	fbxc-19	15.5833	30.7876	28.4274	22.0248	13.8403	46.531	13.7171	29.7746	25.0857	0.791394	0.40114	0.00228302	0.0159134
WBGene00011846	chil-25	129.822	113.478	90.1821	88.8559	74.194	53.7979	47.5776	73.9985	83.9882	0.638308	0.223847	0.000446084	0.00294675																		WBGene00019531	scrm-5	23.862	20.8968	17.8372	34.8764	40.0502	12.5936	53.9401	21.2557	28.164	-0.799336	0.41028	0.00230569	0.0160486
WBGene00004219	ptr-4	88.2402	105.863	30.876	69.5201	30.1635	33.3883	35.3851	31.6971	53.1416	0.964953	0.365209	0.000451561	0.00297428																		WBGene00271824	R03H10.11	36.2028	47.318	45.7949	30.2956	17.01	60.9462	18.5302	41.3958	37.1867	0.714238	0.354056	0.00230768	0.0160486
WBGene00014093	ZK829.1	61.3669	55.1672	63.3622	63.8139	45.9498	26.857	32.1176	27.3312	46.9957	0.737893	0.266439	0.000457097	0.00300747																		WBGene00014007	ZK596.2	34.2407	34.0941	28.338	47.7251	43.1248	11.6256	69.9834	14.8797	35.5014	-0.837398	0.4394	0.00231238	0.0160676
WBGene00016337	fbxb-38	24.1348	19.3682	16.2473	21.6569	46.8258	33.3169	56.4676	35.258	31.6594	-0.898925	0.33772	0.000468174	0.00307431																		WBGene00014104	ZK849.6	19.4457	5.47114	5.14578	15.6809	13.2988	4.84686	17.5714	7.41222	11.1091	-1.1035	0.60201	0.0023502	0.016295
WBGene00008221	nhr-168	48.0586	40.6605	27.5724	38.5467	78.6168	67.3615	56.508	71.0285	53.5441	-0.70665	0.254965	0.000468272	0.00307431																		WBGene00013474	Y69E1A.2	699.844	537.736	382.735	505.674	671.687	249.07	965.105	297.682	538.692	-0.715311	0.361448	0.00237848	0.0164566
WBGene00017639	F20D6.10	124.439	124.21	125.122	105.597	83.2883	73.1925	95.1337	69.5803	100.07	0.509575	0.172122	0.000469663	0.00308233																		WBGene00010893	cutl-9	30.1346	51.6769	40.0325	36.7072	13.8363	103.737	15.9924	35.0948	40.9015	0.918877	0.498863	0.00239407	0.0165438
WBGene00017405	bath-31	63.7014	63.9544	77.178	51.6943	100.901	107.523	109.584	89.0056	82.9426	-0.560397	0.193081	0.000475491	0.00311496																		WBGene00018232	F40E3.5	59.5158	45.5072	42.1099	67.4289	69.9379	44.4749	88.8138	47.7058	58.1868	-0.523242	0.23585	0.0023989	0.0165702
WBGene00019586	K09F6.3	60.6978	60.2329	96.6923	117.421	175.419	159.436	103.93	149.664	115.437	-0.688751	0.248355	0.000482513	0.00315641																		WBGene00013304	ptp-5.2	24.932	17.5931	16.8436	41.2966	32.296	15.5099	49.1604	22.3304	27.4953	-0.765177	0.391482	0.00240759	0.0166164
WBGene00020660	T21G5.2	47.2569	63.9761	51.1824	68.4947	117.35	91.4174	75.2583	96.9242	76.4825	-0.623169	0.220143	0.000483853	0.00316289																		WBGene00016462	C35E7.10	65.7428	65.0788	36.8723	70.433	63.3478	29.3693	81.4199	27.183	54.9309	-0.643759	0.315269	0.00242074	0.0166794
WBGene00017315	ugt-36	52.8449	62.0958	50.3732	73.2115	24.7175	33.3636	35.4009	36.1133	46.0151	0.735221	0.268167	0.000488267	0.00318945																		WBGene00022709	ZK354.8	65.4447	50.5803	35.7904	55.98	51.5215	22.2953	72.031	25.5203	47.3954	-0.658798	0.32348	0.00242311	0.0166887
WBGene00008851	F15B9.8	31.2886	50.5568	6.54041	19.4407	9.27915	6.47825	5.57837	3.55272	16.5894	1.69955	0.687012	0.000492807	0.00321448																		WBGene00017853	F27C1.3	21.789	10.9982	10.4949	17.4381	20.0229	8.71907	28.6839	3.18848	15.1668	-1.00493	0.551859	0.00243777	0.0167827
WBGene00017720	F22F7.2	50.624	54.323	50.3725	58.8246	91.5745	81.7826	84.0846	79.2792	68.8581	-0.565128	0.196437	0.000501085	0.00326262																		WBGene00010215	nhr-193	87.2016	64.8828	55.6967	98.1997	74.6523	46.5138	71.0266	44.6483	67.8527	-0.510759	0.23025	0.0024438	0.0168173
WBGene00013806	Y116A8C.29	89.4077	118.678	101.083	109.404	69.584	62.1431	70.8363	71.4801	86.5771	0.527702	0.180972	0.00050743	0.00330275																		WBGene00014159	arrd-4	62.2799	73.682	70.3889	50.4769	39.2556	107.557	38.9629	66.9694	63.6966	0.577316	0.270274	0.00244849	0.0168216
WBGene00001625	glt-7	16.5124	17.4636	21.9366	22.8051	50.3544	34.4385	42.0395	36.114	30.208	-0.868576	0.326771	0.000508115	0.00330602																		WBGene00015097	B0273.1	54.6404	30.4252	39.4956	49.1866	55.0139	19.2475	108.559	44.092	50.0825	-0.750479	0.391405	0.00244776	0.0168216
WBGene00018106	F36H5.8	19.7135	14.5131	14.6217	10.8407	32.1806	34.3689	33.2298	32.6251	24.0117	-0.941928	0.358883	0.000514277	0.00334048																		WBGene00000019	abt-1	67.6342	46.0951	47.446	60.609	53.0122	20.369	93.4768	33.0032	52.7057	-0.678977	0.338344	0.00244597	0.0168216
WBGene00019548	K09C4.2	7.60971	9.63964	12.9987	29.053	3.70018	3.21297	1.10847	2.6507	8.74666	1.96636	0.784113	0.000514331	0.00334048																		WBGene00194815	Y43F8B.23	8.27423	3.295	0	10.0805	25.4207	5.79875	14.9571	4.24167	9.00849	-1.51502	0.879654	0.00245602	0.0168663
WBGene00185005	T03F6.10	50.8737	34.6917	56.9254	64.268	93.5949	103.912	82.0618	74.1819	70.0637	-0.657426	0.236926	0.000517116	0.00335497																		WBGene00012824	Y43F8B.14	37.4101	21.99	17.9112	33.9541	33.8203	13.5734	27.4121	12.762	24.8541	-0.751682	0.384308	0.00249349	0.0170389
WBGene00020865	T27E4.7	211.326	193.913	309.434	325.223	138.54	144.706	174.079	205.702	212.865	0.55698	0.194231	0.000528438	0.00341745																		WBGene00019279	K01A2.4	41.5031	81.3092	61.046	57.7048	30.6763	107.435	25.0572	49.8981	56.8287	0.712991	0.360752	0.00249859	0.0170667
[truncated: 369 more rows]

## Sheet: S2
Supplementary Table 2. Gene splicing analysis results. Events with BH-adjusted P value below 0.05 and diff.psi>5% were defined as significant. SE, exon skipping; IR, intron retention; AFE, alternative first exon; ALE, alternative last exon; A3SS, alternative 3' splice site; A5SS, alternative 5' splice site.
[truncated: 640 more rows]

[truncated: 16 more sheets: S3, S4, S5, S6, S7, S8, S9, S10, S11, S12, S13, S14, S15, S16, S17, S18]
